# Supplementary material
Source: ML conference proceedings conference paper supplement (https://openreview.net/forum?id=Skh18goLXF)
Supplement: supplementary_material [file attachment]

## Sheet: Sheet1
Buble size	Dataset	Dataset old name	typ sieci	architektura sieci 2x	rozdzielczość zdjęć	szacunkowy czas (min)	augmentacja ID	typ augmentacji danych 4x	ilość danych rzeczywistych z 2021 roku (zbiór treningowy)	ilość danych rzeczywistych z 2022 roku (zbiór treningowy)	ilość danych z generatora (zbiór treningowy) 3x	ilość danych rzeczywistych z 2021 roku (zbiór walidacyjny)	ilość danych rzeczywistych z 2022 roku (zbiór walidacyjny)	ilość danych z generatora (zbiór walidacyjny)	ilość danych rzeczywistych z 2021 roku (zbiór testowy)	ilość danych rzeczywistych z 2022 roku (zbiór testowy)	ilość danych z generatora (zbiór testowy)	dropout	learning rate decay	optymizator	początkowa wartość learning rate 2x	learning rate change	drop out 2x	train_mae 50 epok	train_mae_cm2 50 epok	train_mean_absolute_percentage_error_cm 50 epok	train_mse 50 epok	val_mae 50 epok	val_mae_cm2 50 epok	val_mean_absolute_percentage_error_cm 50 epok	val_mse 50 epok	test_mae 50 epok	test_mae_cm2 50 epok	test_mean_absolute_percentage_error_cm 50 epok	test_mse 50 epok	train_mae 100 epok	train_mae_cm2 100 epok	train_mean_absolute_percentage_error_cm 100 epok	train_mse 100 epok	val_mae 100 epok	val_mae_cm2 100 epok	val_mean_absolute_percentage_error_cm 100 epok	val_mse 100 epok	test_mae 100 epok	test_mae_cm2 100 epok	test_mean_absolute_percentage_error_cm 100 epok	test_mse 100 epok	@dropdown
0.5	Rendering 1	dataset09.01.2023	sieć mobilna B	MobileNet V3 Large	224	2	1	Brightness, contrast	650	0	5000	0	115	0	0	115	0	Tak	CosineDecay	Adam	1e-05			0.686363	5.91317	35.9506	0.902617	1.0426	7.82637	51.4671	2.06901	0.945663	6.7211	53.6974	1.58482	0.689345	5.94434	36.4041	0.905473	1.06063	8.09072	59.4546	2.13766	0.902658	6.5281	50.4382	1.63774
0.5	Rendering 1	dataset09.01.2023	sieć mobilna B	MobileNet V3 Large	224	2	1	Brightness, contrast	650	0	2500	0	115	0	0	115	0	Tak	CosineDecay	Adam	1e-05			0.900411	7.1908	50.0237	1.4859	1.10786	7.77766	61.0933	2.24583	1.22019	9.22948	51.924	2.69458	0.850986	6.73843	47.2302	1.30861	1.03469	6.89405	57.5903	1.95042	1.14906	8.15986	59.2508	2.28499
0.5	Rendering 1	dataset09.01.2023	sieć mobilna B	MobileNet V3 Large	224	2	1	Brightness, contrast	650	0	0	0	115	0	0	115	0	Tak	CosineDecay	Adam	1e-05			0.846432	4.98658	57.1154	1.16746	1.14534	7.94198	64.8248	2.53457	1.3032	9.51501	57.2984	3.05032	0.838822	4.93929	57.34	1.17832	1.05971	6.90518	62.5001	2.06414	1.21287	8.48325	58.9157	2.85781
0.5	Rendering 1	dataset09.01.2023	sieć mobilna B	MobileNet V3 Large	224	2	1	Brightness, contrast	650	0	5000	0	115	0	0	115	0	Tak	CosineDecay	Adam	0.001			0.2597	2.41511	13.269	0.138111	0.835798	6.31112	59.2494	1.22321	0.767532	5.42493	62.2053	1.02343	0.239294	2.22345	12.221	0.117463	0.871579	6.62823	64.7688	1.38857	0.731827	5.30098	55.64	1.01368
0.5	Rendering 1	dataset09.01.2023	sieć mobilna B	MobileNet V3 Large	224	2	1	Brightness, contrast	650	0	2500	0	115	0	0	115	0	Tak	CosineDecay	Adam	0.001			0.281258	2.55027	14.7201	0.160523	0.919503	6.81517	51.7238	1.48789	1.12383	8.75202	50.6611	2.17515	0.264755	2.39657	13.9033	0.140976	0.943526	6.56312	58.5888	1.43905	1.02129	7.6215	52.4455	1.87307
0.5	Rendering 1	dataset09.01.2023	sieć mobilna B	MobileNet V3 Large	224	2	1	Brightness, contrast	650	0	0	0	115	0	0	115	0	Tak	CosineDecay	Adam	0.001			0.380294	2.43412	24.5126	0.254382	0.906558	6.70869	42.5796	1.68194	1.14422	8.91726	44.5148	2.53459	0.399566	2.68555	25.9471	0.283943	0.817792	5.81131	42.3884	1.20934	1.00395	7.54932	43.5375	1.93941
0.5	Rendering 1	dataset09.01.2023	sieć mobilna B	MobileNet V3 Large	224	2	1	Brightness, contrast	650	0	5000	0	115	0	0	115	0	Tak	PiecewiseConstantDecay	Adam		decay_steps=100000, decay_rate=0.96,	Tak	0.692135	5.94353	36.2508	0.898787	1.25214	9.25141	58.4806	2.93085	1.08104	7.87766	55.4684	2.29767	0.679156	5.90155	35.9392	0.879138	1.03173	7.19467	61.9344	1.88838	1.17033	8.59241	58.743	2.58414
0.5	Rendering 1	dataset09.01.2023	sieć mobilna B	MobileNet V3 Large	224	2	1	Brightness, contrast	650	0	2500	0	115	0	0	115	0	Tak	PiecewiseConstantDecay	Adam		decay_steps=100000, decay_rate=0.96,	Tak	0.821427	6.63691	44.4719	1.20608	0.925046	6.61842	64.5981	1.61835	0.839082	5.86619	55.8386	1.35193	0.805589	6.53889	44.5234	1.21208	0.934171	6.80332	62.9731	1.61362	0.934241	6.89983	55.1864	1.69531
0.5	Rendering 1	dataset09.01.2023	sieć mobilna B	MobileNet V3 Large	224	2	1	Brightness, contrast	650	0	0	0	115	0	0	115	0	Tak	PiecewiseConstantDecay	Adam		decay_steps=100000, decay_rate=0.96,	Tak	0.904206	5.3864	58.8516	1.38297	1.28731	8.25862	68.8864	2.8502	1.14465	7.3102	56.8437	2.19867	0.914305	5.45373	61.3907	1.41405	1.23767	8.41715	61.4783	2.63871	1.32737	8.93347	59.7025	2.88149
0.5	Rendering 1	dataset09.01.2023	sieć mobilna B	MobileNet V3 Large	224	2	1	Brightness, contrast	650	0	5000	0	115	0	0	115	0	Tak	PiecewiseConstantDecay	Adam		decay_steps=100000, decay_rate=0.96,	Nie	0.270344	2.47967	14.0433	0.149926	0.973022	7.45742	73.491	1.53673	0.878098	6.48214	68.5432	1.3427	0.251013	2.30718	12.9271	0.130245	0.934522	6.49911	78.4397	1.35047	0.945412	7.10218	69.1077	1.58217
0.5	Rendering 1	dataset09.01.2023	sieć mobilna B	MobileNet V3 Large	224	2	1	Brightness, contrast	650	0	2500	0	115	0	0	115	0	Tak	PiecewiseConstantDecay	Adam		decay_steps=100000, decay_rate=0.96,	Nie	0.300621	2.70709	15.7622	0.181927	0.938726	7.2834	59.4332	1.51931	0.808353	6.02861	58.7383	1.17788	0.288394	2.59766	15.0616	0.167458	0.816529	5.73482	69.3505	1.09867	0.922563	6.94748	64.755	1.46573
0.5	Rendering 1	dataset09.01.2023	sieć mobilna B	MobileNet V3 Large	224	2	1	Brightness, contrast	650	0	0	0	115	0	0	115	0	Tak	PiecewiseConstantDecay	Adam		decay_steps=100000, decay_rate=0.96,	Nie	0.34316	2.30132	21.8397	0.212834	0.821074	5.86491	41.7383	1.3261	0.933249	7.01989	44.8084	1.57918	0.356841	2.35992	23.7695	0.222698	0.903197	6.66038	45.6846	1.53646	0.851553	6.31084	42.1595	1.44391
0.5	Rendering 1	dataset09.01.2023	sieć mobilna B	MobileNet V3 Large	224	2	1	Brightness, contrast	650	0	5000	0	115	0	0	115	0	Nie	PiecewiseConstantDecay	Adam		decay_steps=100000, decay_rate=0.96,	Tak	0.205	1.771	11.759	0.082	1.008	7.156	86.99	1.557	1.026	7.872	70.315	1.612	0.203	1.776	11.158	0.086	0.887	6.549	62.773	1.262	0.947	6.459	91.061	1.283
0.5	Rendering 1	dataset09.01.2023	sieć mobilna B	MobileNet V3 Large	224	2	1	Brightness, contrast	650	0	2500	0	115	0	0	115	0	Nie	PiecewiseConstantDecay	Adam		decay_steps=100000, decay_rate=0.96,	Tak	0.256	1.634	18.355	0.109	1.136	7.698	65.048	2.285	1.282	8.934	64.849	2.816	0.248	1.605	17.764	0.102	1.039	7.263	51.146	1.945	1.025	6.644	71.973	1.837
0.5	Rendering 1	dataset09.01.2023	sieć mobilna B	MobileNet V3 Large	224	2	1	Brightness, contrast	650	0	0	0	115	0	0	115	0	Nie	PiecewiseConstantDecay	Adam		decay_steps=100000, decay_rate=0.96,	Tak	0.048	0.45	2.448	0.005	0.537	4.093	43.682	0.539	0.615	4.941	46.246	0.685	0.032	0.302	1.658	0.002	0.554	4.273	44.952	0.57	0.579	3.99	55.441	0.541
0.5	Rendering 1	dataset09.01.2023	sieć mobilna B	MobileNet V3 Large	224	2	1	Brightness, contrast	650	0	5000	0	115	0	0	115	0	Nie	PiecewiseConstantDecay	Adam		decay_steps=100000, decay_rate=0.96,	Nie	0.054	0.494	2.892	0.006	0.67	5.204	45.734	0.871	0.698	5.746	43.035	0.968	0.038	0.334	2.024	0.003	0.637	5.036	41.121	0.826	0.616	4.351	51.35	0.678
0.5	Rendering 1	dataset09.01.2023	sieć mobilna B	MobileNet V3 Large	224	2	1	Brightness, contrast	650	0	2500	0	115	0	0	115	0	Nie	PiecewiseConstantDecay	Adam		decay_steps=100000, decay_rate=0.96,	Nie	0.092	0.625	6.43	0.017	1.042	7.664	43.951	2.18	1.171	8.843	46.657	2.607	0.061	0.408	4.109	0.006	1.101	7.918	47.48	2.165	0.879	6.094	45.997	1.509
0.5	Rendering 1	dataset09.01.2023	sieć mobilna B	MobileNet V3 Large	224	2	1	Brightness, contrast	650	0	0	0	115	0	0	115	0	Nie	PiecewiseConstantDecay	Adam		decay_steps=100000, decay_rate=0.96,	Nie	0.236	2.084	13.01	0.108	0.947	6.869	66.222	1.67	1.106	8.404	73.21	2.135	0.225	1.977	12.458	0.096	0.928	6.69	64.016	1.575	0.905	6.055	80.776	1.516
0.5	Rendering 1	dataset09.01.2023	sieć mobilna B	MobileNet V3 Large	224	2	1	Brightness, contrast	650	0	5000	0	115	0	0	115	0	Tak	CosineDecay	RMSprop	1e-05			0.981316	5.7899	67.733	1.57689	1.0498	7.49538	67.0401	1.87966	1.11245	8.61721	61.0701	2.24973	0.978642	5.65694	64.7722	1.57459	0.871664	5.88991	69.197	1.3914	1.09395	7.5975	86.3499	1.92079
0.5	Rendering 1	dataset09.01.2023	sieć mobilna B	MobileNet V3 Large	224	2	1	Brightness, contrast	650	0	2500	0	115	0	0	115	0	Tak	CosineDecay	RMSprop	1e-05			0.676126	5.64472	38.0725	0.834484	1.01416	7.72024	57.3455	1.84921	1.00348	7.98568	51.8206	1.93837	0.613666	5.13794	34.9083	0.692857	0.882817	6.15559	71.3433	1.39024	0.891838	6.5639	58.1776	1.32089
0.5	Rendering 1	dataset09.01.2023	sieć mobilna B	MobileNet V3 Large	224	2	1	Brightness, contrast	650	0	0	0	115	0	0	115	0	Tak	CosineDecay	RMSprop	1e-05			0.925935	5.61278	67.0746	1.39584	1.50966	10.0015	63.4072	3.78291	1.61184	11.0245	66.2661	4.24161	0.815298	4.8262	56.4013	1.10204	1.25745	7.70307	58.1078	2.69718	1.40229	9.09906	63.2544	3.21796
0.5	Rendering 1	dataset09.01.2023	sieć mobilna B	MobileNet V3 Large	224	2	1	Brightness, contrast	650	0	5000	0	115	0	0	115	0	Tak	CosineDecay	RMSprop	0.001			0.21816	2.07896	10.7428	0.104687	0.733657	5.84067	37.4441	1.03952	0.655288	4.8754	40.6898	0.783545	0.204242	1.93288	10.1409	0.0921233	0.680474	5.52988	35.9004	0.975647	0.613359	4.68406	39.1531	0.766804
0.5	Rendering 1	dataset09.01.2023	sieć mobilna B	MobileNet V3 Large	224	2	1	Brightness, contrast	650	0	2500	0	115	0	0	115	0	Tak	CosineDecay	RMSprop	0.001			0.660119	5.52472	36.2874	0.824699	0.998843	7.19928	93.3419	1.48016	1.01887	8.09864	67.2383	1.69493	0.665417	5.51997	37.1698	0.813621	0.938397	6.59979	88.1343	1.34077	0.948492	7.03091	76.1469	1.455
0.5	Rendering 1	dataset09.01.2023	sieć mobilna B	MobileNet V3 Large	224	2	1	Brightness, contrast	650	0	0	0	115	0	0	115	0	Tak	CosineDecay	RMSprop	0.001			0.323153	2.15605	21.6713	0.181237	1.26629	9.11894	49.0643	2.86821	1.38604	10.1881	50.8448	3.40009	0.270912	1.85992	18.0598	0.13636	0.945082	6.54399	42.0087	1.83882	1.08469	7.92664	44.0905	2.41505
0.5	Rendering 1	dataset09.01.2023	sieć mobilna B	MobileNet V3 Large	224	2	1	Brightness, contrast	650	0	5000	0	115	0	0	115	0	Tak	PiecewiseConstantDecay	RMSprop		decay_steps=100000, decay_rate=0.96,	Tak	0.563788	5.02452	29.5549	0.612114	1.00255	7.50066	82.2473	1.52311	0.849878	6.32413	77.4583	1.21093	0.538559	4.76876	28.6394	0.552742	0.785658	5.33536	85.2055	0.9873	0.935318	6.95534	81.4772	1.38125
0.5	Rendering 1	dataset09.01.2023	sieć mobilna B	MobileNet V3 Large	224	2	1	Brightness, contrast	650	0	2500	0	115	0	0	115	0	Tak	PiecewiseConstantDecay	RMSprop		decay_steps=100000, decay_rate=0.96,	Tak	0.746164	6.21552	41.5142	1.02439	1.07504	8.11465	71.0443	2.1041	0.999427	7.28348	79.0676	1.80707	0.731724	6.01599	40.2005	0.996121	0.918519	6.3156	87.1202	1.34885	1.01082	7.52241	70.2568	1.84959
0.5	Rendering 1	dataset09.01.2023	sieć mobilna B	MobileNet V3 Large	224	2	1	Brightness, contrast	650	0	0	0	115	0	0	115	0	Tak	PiecewiseConstantDecay	RMSprop		decay_steps=100000, decay_rate=0.96,	Tak	0.835895	4.89571	57.8886	1.10938	1.30623	9.302	59.5995	2.99539	1.27594	8.55739	68.7293	2.71493	0.832621	5.14775	58.9359	1.12276	1.10584	7.23069	68.2329	1.93432	1.29417	9.02343	66.0578	3.01806
0.5	Rendering 1	dataset09.01.2023	sieć mobilna B	MobileNet V3 Large	224	2	1	Brightness, contrast	650	0	5000	0	115	0	0	115	0	Tak	PiecewiseConstantDecay	RMSprop		decay_steps=100000, decay_rate=0.96,	Nie	0.180032	1.71855	8.83177	0.0754395	1.37986	9.86591	55.085	3.15421	1.26921	8.79881	55.0156	2.6423	0.162224	1.5325	7.9826	0.0634751	1.17517	7.86709	54.5225	2.21793	1.2669	9.12663	51.4436	2.80025
0.5	Rendering 1	dataset09.01.2023	sieć mobilna B	MobileNet V3 Large	224	2	1	Brightness, contrast	650	0	2500	0	115	0	0	115	0	Tak	PiecewiseConstantDecay	RMSprop		decay_steps=100000, decay_rate=0.96,	Nie	0.235063	2.15558	12.0361	0.117047	1.07759	8.36482	44.8674	2.08915	0.995874	7.38265	44.8089	1.73231	0.219971	2.01988	11.3404	0.10176	0.924921	6.61942	43.3485	1.51285	1.01345	7.82995	42.723	1.93117
0.5	Rendering 1	dataset09.01.2023	sieć mobilna B	MobileNet V3 Large	224	2	1	Brightness, contrast	650	0	0	0	115	0	0	115	0	Tak	PiecewiseConstantDecay	RMSprop		decay_steps=100000, decay_rate=0.96,	Nie	0.301385	2.03658	19.9005	0.165585	0.924388	6.79331	39.5488	1.87033	0.9138	6.47581	41.0614	1.63059	0.278332	1.83853	18.2661	0.147298	1.05688	7.83944	44.4666	2.18689	1.11303	8.16956	46.9186	2.31772
0.5	Rendering 1	dataset09.01.2023	sieć mobilna B	MobileNet V3 Large	224	2	1	Brightness, contrast	650	0	5000	0	115	0	0	115	0	Nie	PiecewiseConstantDecay	RMSprop		decay_steps=100000, decay_rate=0.96,	Tak	0.375	3.362	19.982	0.295	1.016	7.322	73.953	1.862	1.087	8.189	76.392	1.98	0.383	3.432	20.237	0.303	0.963	7.075	58.199	1.8	0.923	6.135	85.218	1.476
0.5	Rendering 1	dataset09.01.2023	sieć mobilna B	MobileNet V3 Large	224	2	1	Brightness, contrast	650	0	2500	0	115	0	0	115	0	Nie	PiecewiseConstantDecay	RMSprop		decay_steps=100000, decay_rate=0.96,	Tak	0.305	1.981	20.278	0.158	1.164	7.949	61.776	2.249	1.264	8.932	55.131	2.65	0.27	1.765	19.069	0.132	1.144	7.746	59.452	2.026	1.047	6.671	67.021	1.928
0.5	Rendering 1	dataset09.01.2023	sieć mobilna B	MobileNet V3 Large	224	2	1	Brightness, contrast	650	0	0	0	115	0	0	115	0	Nie	PiecewiseConstantDecay	RMSprop		decay_steps=100000, decay_rate=0.96,	Tak	0.1	0.951	5.019	0.022	0.771	5.811	50.867	1.132	0.831	6.627	49.003	1.335	0.079	0.756	3.888	0.014	0.733	5.593	46.31	1.029	0.674	4.735	50.553	0.968
0.5	Rendering 1	dataset09.01.2023	sieć mobilna B	MobileNet V3 Large	224	2	1	Brightness, contrast	650	0	5000	0	115	0	0	115	0	Nie	PiecewiseConstantDecay	RMSprop		decay_steps=100000, decay_rate=0.96,	Nie	0.142	1.298	7.392	0.043	0.928	6.892	52.609	1.634	0.996	7.7	50.069	1.877	0.127	1.177	6.453	0.035	0.907	6.683	48.687	1.506	0.833	5.669	53.898	1.271
0.5	Rendering 1	dataset09.01.2023	sieć mobilna B	MobileNet V3 Large	224	2	1	Brightness, contrast	650	0	2500	0	115	0	0	115	0	Nie	PiecewiseConstantDecay	RMSprop		decay_steps=100000, decay_rate=0.96,	Nie	0.145	0.973	9.747	0.037	1.144	8.172	54.178	2.503	1.269	9.32	55.639	2.969	0.125	0.838	8.578	0.027	0.978	7.256	45.947	1.83	0.846	5.86	50.061	1.475
0.5	Rendering 1	dataset09.01.2023	sieć mobilna B	MobileNet V3 Large	224	2	1	Brightness, contrast	650	0	0	0	115	0	0	115	0	Nie	PiecewiseConstantDecay	RMSprop		decay_steps=100000, decay_rate=0.96,	Nie	0.176	1.571	9.591	0.061	0.947	6.876	83.887	1.341	1.005	7.723	80.79	1.562	0.173	1.559	9.401	0.06	0.908	6.76	73.558	1.236	0.944	6.427	98.35	1.37
0.5	Rendering 1	dataset09.01.2023	sieć mobilna B	MobileNet V3 Large	224	2	4	Brightness, contrast, hue, saturation	650	0	5000	0	115	0	0	115	0	Tak	CosineDecay	Adam	1e-05
0.5	Rendering 1	dataset09.01.2023	sieć mobilna B	MobileNet V3 Large	224	2	4	Brightness, contrast, hue, saturation	650	0	2500	0	115	0	0	115	0	Tak	CosineDecay	Adam	1e-05
0.5	Rendering 1	dataset09.01.2023	sieć mobilna B	MobileNet V3 Large	224	2	4	Brightness, contrast, hue, saturation	650	0	0	0	115	0	0	115	0	Tak	CosineDecay	Adam	1e-05			0.330462	2.22569	21.6496	0.199234	1.06128	7.83923	44.0458	2.01158	0.93858	7.28069	40.526	1.84742	0.339581	2.30793	22.1506	0.212995	0.953053	7.2168	40.9728	1.7911	0.913373	6.5449	41.3213	1.43675
0.5	Rendering 1	dataset09.01.2023	sieć mobilna B	MobileNet V3 Large	224	2	4	Brightness, contrast, hue, saturation	650	0	5000	0	115	0	0	115	0	Tak	CosineDecay	Adam	0.001
0.5	Rendering 1	dataset09.01.2023	sieć mobilna B	MobileNet V3 Large	224	2	4	Brightness, contrast, hue, saturation	650	0	2500	0	115	0	0	115	0	Tak	CosineDecay	Adam	0.001
0.5	Rendering 1	dataset09.01.2023	sieć mobilna B	MobileNet V3 Large	224	2	4	Brightness, contrast, hue, saturation	650	0	0	0	115	0	0	115	0	Tak	CosineDecay	Adam	0.001			0.862768	5.12724	55.4747	1.19024	1.30463	8.98293	60.1879	2.67977	1.17004	8.36237	65.6289	2.40861	0.843177	5.06976	57.1935	1.20051	1.18358	8.40617	62.2858	2.55086	1.15287	7.74055	65.8874	2.01496
0.5	Rendering 1	dataset09.01.2023	sieć mobilna B	MobileNet V3 Large	224	2	4	Brightness, contrast, hue, saturation	650	0	5000	0	115	0	0	115	0	Tak	PiecewiseConstantDecay	Adam		decay_steps=100000, decay_rate=0.96,	Tak	0.710087	6.10745	37.751	0.970654	1.06893	8.32001	49.8508	2.21492	1.0217	7.58932	52.7978	2.04215	0.712367	6.08329	37.5761	0.964931	0.945574	6.69174	52.4977	1.7233	1.04147	7.90313	51.1922	2.1947
0.5	Rendering 1	dataset09.01.2023	sieć mobilna B	MobileNet V3 Large	224	2	4	Brightness, contrast, hue, saturation	650	0	2500	0	115	0	0	115	0	Tak	PiecewiseConstantDecay	Adam		decay_steps=100000, decay_rate=0.96,	Tak	0.794443	6.67075	42.6322	1.18191	1.251	9.25276	57.1111	2.94998	1.09985	7.90244	52.3316	2.44545	0.794212	6.69146	41.7223	1.19563	1.01558	7.0237	53.0219	1.86647	1.17948	8.63006	55.9949	2.68848
0.5	Rendering 1	dataset09.01.2023	sieć mobilna B	MobileNet V3 Large	224	2	4	Brightness, contrast, hue, saturation	650	0	0	0	115	0	0	115	0	Tak	PiecewiseConstantDecay	Adam		decay_steps=100000, decay_rate=0.96,	Tak	1.0313	5.91449	72.4326	1.7181	1.41701	9.77147	67.7127	3.4451	1.21222	8.23687	62.8861	2.45996	1.03092	6.16948	73.6356	1.64444	1.10857	7.24381	64.8898	1.89209	1.3316	9.24415	60.1396	3.17267
0.5	Rendering 1	dataset09.01.2023	sieć mobilna B	MobileNet V3 Large	224	2	4	Brightness, contrast, hue, saturation	650	0	5000	0	115	0	0	115	0	Tak	PiecewiseConstantDecay	Adam		decay_steps=100000, decay_rate=0.96,	Nie	0.228672	2.1269	11.4834	0.110186	0.900759	7.34194	40.15	1.65951	0.824131	6.49298	39.1382	1.47089	0.207583	1.98461	10.1543	0.0944698	0.754763	5.67888	38.5483	1.12669	0.853853	6.87572	40.6502	1.50987
0.5	Rendering 1	dataset09.01.2023	sieć mobilna B	MobileNet V3 Large	224	2	4	Brightness, contrast, hue, saturation	650	0	2500	0	115	0	0	115	0	Tak	PiecewiseConstantDecay	Adam		decay_steps=100000, decay_rate=0.96,	Nie	0.299685	2.73326	15.5824	0.185518	0.905399	7.0894	54.8418	1.61152	0.817455	6.17967	54.0737	1.29262	0.276327	2.4881	14.4628	0.153167	0.780174	5.59602	58.8001	1.17755	0.872151	6.80091	51.5848	1.53671
0.5	Rendering 1	dataset09.01.2023	sieć mobilna B	MobileNet V3 Large	224	2	4	Brightness, contrast, hue, saturation	650	0	0	0	115	0	0	115	0	Tak	PiecewiseConstantDecay	Adam		decay_steps=100000, decay_rate=0.96,	Nie	0.362759	2.4484	24.5184	0.240761	0.89647	7.17799	42.189	1.65146	0.842324	6.46981	43.5186	1.41338	0.384562	2.52274	24.5043	0.265626	0.824011	5.98823	44.349	1.25318	0.956245	7.349	46.238	1.75485
0.5	Rendering 1	dataset09.01.2023	sieć mobilna B	MobileNet V3 Large	224	2	4	Brightness, contrast, hue, saturation	650	0	5000	0	115	0	0	115	0	Nie	PiecewiseConstantDecay	Adam		decay_steps=100000, decay_rate=0.96,	Tak	0.105	0.963	5.52	0.023	1.095	7.906	50.129	2.42	1.27	9.252	51.941	3.17	0.086	0.8	4.417	0.016	1.203	8.413	53.479	2.608	0.93	6.277	55.199	1.719
0.5	Rendering 1	dataset09.01.2023	sieć mobilna B	MobileNet V3 Large	224	2	4	Brightness, contrast, hue, saturation	650	0	2500	0	115	0	0	115	0	Nie	PiecewiseConstantDecay	Adam		decay_steps=100000, decay_rate=0.96,	Tak	0.139	1.242	7.429	0.04	1.046	7.566	54.672	2.182	1.193	8.817	59.181	2.54	0.126	1.136	6.586	0.035	1.123	7.95	52.866	2.345	0.903	6.121	56.465	1.419
0.5	Rendering 1	dataset09.01.2023	sieć mobilna B	MobileNet V3 Large	224	2	4	Brightness, contrast, hue, saturation	650	0	0	0	115	0	0	115	0	Nie	PiecewiseConstantDecay	Adam		decay_steps=100000, decay_rate=0.96,	Tak	0.162	1.055	11.057	0.046	0.852	6.422	42.595	1.436	0.909	7.106	40.789	1.679	0.141	0.954	9.317	0.037	0.826	6.187	39.823	1.259	0.667	4.759	37.527	0.948
0.5	Rendering 1	dataset09.01.2023	sieć mobilna B	MobileNet V3 Large	224	2	4	Brightness, contrast, hue, saturation	650	0	5000	0	115	0	0	115	0	Nie	PiecewiseConstantDecay	Adam		decay_steps=100000, decay_rate=0.96,	Nie
0.5	Rendering 1	dataset09.01.2023	sieć mobilna B	MobileNet V3 Large	224	2	4	Brightness, contrast, hue, saturation	650	0	2500	0	115	0	0	115	0	Nie	PiecewiseConstantDecay	Adam		decay_steps=100000, decay_rate=0.96,	Nie
0.5	Rendering 1	dataset09.01.2023	sieć mobilna B	MobileNet V3 Large	224	2	4	Brightness, contrast, hue, saturation	650	0	0	0	115	0	0	115	0	Nie	PiecewiseConstantDecay	Adam		decay_steps=100000, decay_rate=0.96,	Nie
0.5	Rendering 1	dataset09.01.2023	sieć mobilna B	MobileNet V3 Large	224	2	4	Brightness, contrast, hue, saturation	650	0	5000	0	115	0	0	115	0	Tak	CosineDecay	RMSprop	1e-05
0.5	Rendering 1	dataset09.01.2023	sieć mobilna B	MobileNet V3 Large	224	2	4	Brightness, contrast, hue, saturation	650	0	2500	0	115	0	0	115	0	Tak	CosineDecay	RMSprop	1e-05
0.5	Rendering 1	dataset09.01.2023	sieć mobilna B	MobileNet V3 Large	224	2	4	Brightness, contrast, hue, saturation	650	0	0	0	115	0	0	115	0	Tak	CosineDecay	RMSprop	1e-05			0.852049	5.12559	57.8988	1.22983	1.79711	11.5646	70.1227	4.85221	1.68406	10.7309	67.6713	4.67885	0.861071	5.33919	60.2886	1.21582	1.73061	11.1569	68.8261	4.66961	1.59769	10.199	67.2845	4.10845
0.5	Rendering 1	dataset09.01.2023	sieć mobilna B	MobileNet V3 Large	224	2	4	Brightness, contrast, hue, saturation	650	0	5000	0	115	0	0	115	0	Tak	CosineDecay	RMSprop	0.001
0.5	Rendering 1	dataset09.01.2023	sieć mobilna B	MobileNet V3 Large	224	2	4	Brightness, contrast, hue, saturation	650	0	2500	0	115	0	0	115	0	Tak	CosineDecay	RMSprop	0.001
0.5	Rendering 1	dataset09.01.2023	sieć mobilna B	MobileNet V3 Large	224	2	4	Brightness, contrast, hue, saturation	650	0	0	0	115	0	0	115	0	Tak	CosineDecay	RMSprop	0.001			0.274889	1.91679	18.2343	0.132896	1.21893	9.06269	48.6305	2.49457	1.04155	8.07886	42.9134	2.27363	0.257148	1.75535	17.1945	0.121954	1.15912	8.70976	48.8961	2.45221	1.04549	7.85381	42.7994	2.1082
0.5	Rendering 1	dataset09.01.2023	sieć mobilna B	MobileNet V3 Large	224	2	4	Brightness, contrast, hue, saturation	650	0	5000	0	115	0	0	115	0	Tak	PiecewiseConstantDecay	RMSprop		decay_steps=100000, decay_rate=0.96,	Tak	0.60258	5.23603	32.8258	0.681367	0.906884	6.81199	85.0291	1.44336	0.839304	6.03201	78.9592	1.2999	0.604821	5.30589	32.129	0.710733	0.954562	7.15916	83.1609	1.52783	0.810087	6.12339	65.6826	1.25902
0.5	Rendering 1	dataset09.01.2023	sieć mobilna B	MobileNet V3 Large	224	2	4	Brightness, contrast, hue, saturation	650	0	2500	0	115	0	0	115	0	Tak	PiecewiseConstantDecay	RMSprop		decay_steps=100000, decay_rate=0.96,	Tak	0.730431	6.04994	40.7292	0.982682	1.03817	8.08452	60.5914	1.88614	1.02368	7.76522	68.6787	1.80612	0.739297	6.16095	39.7039	1.01582	0.917718	6.82612	69.9534	1.44285	1.02694	8.09542	60.6876	1.86581
0.5	Rendering 1	dataset09.01.2023	sieć mobilna B	MobileNet V3 Large	224	2	4	Brightness, contrast, hue, saturation	650	0	0	0	115	0	0	115	0	Tak	PiecewiseConstantDecay	RMSprop		decay_steps=100000, decay_rate=0.96,	Tak	0.885725	5.30106	62.8869	1.28411	1.32456	9.47138	61.176	3.0604	1.28049	9.22018	57.5664	2.72098	0.875341	5.32354	62.0137	1.26755	1.16048	8.09094	59.1453	2.37291	1.4045	10.1393	61.411	3.34462
0.5	Rendering 1	dataset09.01.2023	sieć mobilna B	MobileNet V3 Large	224	2	4	Brightness, contrast, hue, saturation	650	0	5000	0	115	0	0	115	0	Tak	PiecewiseConstantDecay	RMSprop		decay_steps=100000, decay_rate=0.96,	Nie	0.21328	2.01815	10.5397	0.0980133	1.09302	8.09899	46.5492	2.06806	0.973395	7.0582	44.3372	1.74947	0.206051	1.95621	10.1025	0.0904895	1.09037	8.17039	46.4753	2.05904	1.03114	7.72093	43.6107	1.96764
0.5	Rendering 1	dataset09.01.2023	sieć mobilna B	MobileNet V3 Large	224	2	4	Brightness, contrast, hue, saturation	650	0	2500	0	115	0	0	115	0	Tak	PiecewiseConstantDecay	RMSprop		decay_steps=100000, decay_rate=0.96,	Nie	0.23902	2.2008	12.2746	0.119972	0.724863	5.90056	39.0935	0.953503	0.668937	5.2517	39.5357	0.86414	0.227455	2.07921	11.7622	0.105549	0.660754	4.92975	42.3573	0.806052	0.720085	5.86732	39.759	1.05563
0.5	Rendering 1	dataset09.01.2023	sieć mobilna B	MobileNet V3 Large	224	2	4	Brightness, contrast, hue, saturation	650	0	0	0	115	0	0	115	0	Tak	PiecewiseConstantDecay	RMSprop		decay_steps=100000, decay_rate=0.96,	Nie	0.273696	1.87076	17.7512	0.142737	0.952809	7.07014	42.5156	1.76946	0.979975	7.32728	41.1196	1.92727	0.258235	1.74508	17.1126	0.117968	0.890519	6.55813	40.4725	1.56819	1.1689	9.00755	45.3178	2.4965
0.5	Rendering 1	dataset09.01.2023	sieć mobilna B	MobileNet V3 Large	224	2	4	Brightness, contrast, hue, saturation	650	0	5000	0	115	0	0	115	0	Nie	PiecewiseConstantDecay	RMSprop		decay_steps=100000, decay_rate=0.96,	Tak	0.054	0.507	2.729	0.006	0.516	4.022	37.681	0.524	0.526	4.358	33.959	0.542	0.04	0.379	2.041	0.004	0.518	3.995	40.417	0.518	0.477	3.26	46.35	0.447
0.5	Rendering 1	dataset09.01.2023	sieć mobilna B	MobileNet V3 Large	224	2	4	Brightness, contrast, hue, saturation	650	0	2500	0	115	0	0	115	0	Nie	PiecewiseConstantDecay	RMSprop		decay_steps=100000, decay_rate=0.96,	Tak	0.058	0.529	3.033	0.007	0.537	4.156	40.19	0.547	0.592	4.863	40.052	0.631	0.044	0.402	2.258	0.004	0.537	4.171	40.227	0.513	0.585	4.046	55.671	0.604
0.5	Rendering 1	dataset09.01.2023	sieć mobilna B	MobileNet V3 Large	224	2	4	Brightness, contrast, hue, saturation	650	0	0	0	115	0	0	115	0	Nie	PiecewiseConstantDecay	RMSprop		decay_steps=100000, decay_rate=0.96,	Tak	0.111	0.738	7.743	0.021	0.867	6.687	36.658	1.662	0.992	7.882	38.04	2.087	0.07	0.47	4.612	0.009	0.864	6.656	36.051	1.541	0.646	4.804	33.333	0.952
0.5	Rendering 1	dataset09.01.2023	sieć mobilna B	MobileNet V3 Large	224	2	4	Brightness, contrast, hue, saturation	650	0	5000	0	115	0	0	115	0	Nie	PiecewiseConstantDecay	RMSprop		decay_steps=100000, decay_rate=0.96,	Nie	0.291	2.636	15.534	0.169	0.946	6.934	59.135	1.69	1.065	8.077	60.214	2.037	0.292	2.624	15.744	0.172	0.941	6.908	55.805	1.607	0.763	5.226	62.285	1.066
0.5	Rendering 1	dataset09.01.2023	sieć mobilna B	MobileNet V3 Large	224	2	4	Brightness, contrast, hue, saturation	650	0	2500	0	115	0	0	115	0	Nie	PiecewiseConstantDecay	RMSprop		decay_steps=100000, decay_rate=0.96,	Nie	0.378	3.235	21.344	0.279	1.013	7.42	68.68	1.899	1.069	8.063	64.583	2.134	0.347	2.99	19.646	0.239	0.904	6.589	52.696	1.501	0.847	5.592	75.425	1.215
0.5	Rendering 1	dataset09.01.2023	sieć mobilna B	MobileNet V3 Large	224	2	4	Brightness, contrast, hue, saturation	650	0	0	0	115	0	0	115	0	Nie	PiecewiseConstantDecay	RMSprop		decay_steps=100000, decay_rate=0.96,	Nie	0.334	2.086	23.689	0.188	1.076	7.488	60.581	2.145	1.279	8.924	62.82	2.779	0.276	1.748	19.738	0.127	1.139	7.718	58.532	2.273	0.952	6.034	63.423	1.634
0.5	Rendering 1	dataset09.01.2023	sieć mobilna B	MobileNet V3 Large	224	1.66667	1	Flip	650	0	5000	0	115	0	0	115	0	Tak	PiecewiseConstantDecay	Adam	1e-05	decay_steps=100000, decay_rate=0.96,	Tak	0.826825	7.009	43.994	1.29425	1.32141	9.12063	60.8363	2.90447	1.20499	8.60883	55.8026	2.87649	0.817394	6.90463	44.1803	1.25126	1.18761	8.4759	57.0374	2.57197	1.12127	7.61459	56.2996	2.12662
0.5	Rendering 1	dataset09.01.2023	sieć mobilna B	MobileNet V3 Large	224	1.66667	1	Flip	650	0	2500	0	115	0	0	115	0	Tak	PiecewiseConstantDecay	Adam	1e-05	decay_steps=100000, decay_rate=0.96,	Tak	0.911279	7.2688	50.1807	1.4933	1.29866	9.12342	55.6113	2.79542	1.13991	8.18312	56.6491	2.30682	0.904759	7.29898	49.8125	1.46511	1.14969	8.28394	55.2352	2.25334	1.13131	7.70973	54.6424	2.12083
0.5	Rendering 1	dataset09.01.2023	sieć mobilna B	MobileNet V3 Large	224	1.66667	1	Flip	650	0	0	0	115	0	0	115	0	Tak	PiecewiseConstantDecay	Adam	1e-05	decay_steps=100000, decay_rate=0.96,	Tak	1.02206	6.1007	70.313	1.74936	1.33376	9.36473	59.3504	3.02351	1.28079	9.02266	57.8305	2.98283	1.09119	6.4065	73.346	1.93242	1.28182	9.22417	60.5455	2.84288	1.3343	9.02037	64.5763	2.99633
0.5	Rendering 1	dataset09.01.2023	sieć mobilna B	MobileNet V3 Large	224	1.66667	1	Flip	650	0	5000	0	115	0	0	115	0	Tak	PiecewiseConstantDecay	Adam	1e-05	decay_steps=100000, decay_rate=0.96,	Nie	0.826825	7.009	43.994	1.29425	1.32141	9.12063	60.8363	2.90447	1.20499	8.60883	55.8026	2.87649	0.817394	6.90463	44.1803	1.25126	1.18761	8.4759	57.0374	2.57197	1.12127	7.61459	56.2996	2.12662
0.5	Rendering 1	dataset09.01.2023	sieć mobilna B	MobileNet V3 Large	224	1.66667	1	Flip	650	0	2500	0	115	0	0	115	0	Tak	PiecewiseConstantDecay	Adam	1e-05	decay_steps=100000, decay_rate=0.96,	Nie	0.911279	7.2688	50.1807	1.4933	1.29866	9.12342	55.6113	2.79542	1.13991	8.18312	56.6491	2.30682	0.904759	7.29898	49.8125	1.46511	1.14969	8.28394	55.2352	2.25334	1.13131	7.70973	54.6424	2.12083
0.5	Rendering 1	dataset09.01.2023	sieć mobilna B	MobileNet V3 Large	224	1.66667	1	Flip	650	0	0	0	115	0	0	115	0	Tak	PiecewiseConstantDecay	Adam	1e-05	decay_steps=100000, decay_rate=0.96,	Nie	1.02206	6.1007	70.313	1.74936	1.33376	9.36473	59.3504	3.02351	1.28079	9.02266	57.8305	2.98283	1.09119	6.4065	73.346	1.93242	1.28182	9.22417	60.5455	2.84288	1.3343	9.02037	64.5763	2.99633
0.5	Rendering 1	dataset09.01.2023	sieć mobilna B	MobileNet V3 Large	224	1.66667	1	Flip	650	0	5000	0	115	0	0	115	0	Tak	PiecewiseConstantDecay	Adam	0.001	decay_steps=100000, decay_rate=0.96,	Tak	0.316027	2.9126	16.1006	0.205707	0.946902	7.12517	69.3246	1.48301	0.90775	7.07681	60.9649	1.61672	0.305037	2.82343	15.5131	0.189013	0.921499	7.07706	66.7269	1.62376	0.870093	6.56697	65.0915	1.41539
0.5	Rendering 1	dataset09.01.2023	sieć mobilna B	MobileNet V3 Large	224	1.66667	1	Flip	650	0	2500	0	115	0	0	115	0	Tak	PiecewiseConstantDecay	Adam	0.001	decay_steps=100000, decay_rate=0.96,	Tak	0.392816	3.44026	20.3817	0.307738	0.771746	5.64564	77.5799	0.9436	0.753988	5.64296	69.2255	0.949727	0.374675	3.32922	19.4633	0.286546	0.793385	5.81085	83.1898	1.03517	0.764963	5.5542	74.6319	0.950103
0.5	Rendering 1	dataset09.01.2023	sieć mobilna B	MobileNet V3 Large	224	1.66667	1	Flip	650	0	0	0	115	0	0	115	0	Tak	PiecewiseConstantDecay	Adam	0.001	decay_steps=100000, decay_rate=0.96,	Tak	0.500709	3.31293	31.0674	0.460414	1.04309	7.86691	43.3598	2.01804	0.942935	7.32768	42.2784	1.94938	0.491968	3.23028	30.6283	0.475747	0.98523	7.47924	46.8682	1.89804	0.898103	6.73172	39.1298	1.68309
0.5	Rendering 1	dataset09.01.2023	sieć mobilna B	MobileNet V3 Large	224	1.66667	1	Flip	650	0	5000	0	115	0	0	115	0	Tak	PiecewiseConstantDecay	Adam	0.001	decay_steps=100000, decay_rate=0.96,	Nie	0.316027	2.9126	16.1006	0.205707	0.946902	7.12517	69.3246	1.48301	0.90775	7.07681	60.9649	1.61672	0.305037	2.82343	15.5131	0.189013	0.921499	7.07706	66.7269	1.62376	0.870093	6.56697	65.0915	1.41539
0.5	Rendering 1	dataset09.01.2023	sieć mobilna B	MobileNet V3 Large	224	1.66667	1	Flip	650	0	2500	0	115	0	0	115	0	Tak	PiecewiseConstantDecay	Adam	0.001	decay_steps=100000, decay_rate=0.96,	Nie	0.392816	3.44026	20.3817	0.307738	0.771746	5.64564	77.5799	0.9436	0.753988	5.64296	69.2255	0.949727	0.374675	3.32922	19.4633	0.286546	0.793385	5.81085	83.1898	1.03517	0.764963	5.5542	74.6319	0.950103
0.5	Rendering 1	dataset09.01.2023	sieć mobilna B	MobileNet V3 Large	224	1.66667	1	Flip	650	0	0	0	115	0	0	115	0	Tak	PiecewiseConstantDecay	Adam	0.001	decay_steps=100000, decay_rate=0.96,	Nie	0.500709	3.31293	31.0674	0.460414	1.04309	7.86691	43.3598	2.01804	0.942935	7.32768	42.2784	1.94938	0.491968	3.23028	30.6283	0.475747	0.98523	7.47924	46.8682	1.89804	0.898103	6.73172	39.1298	1.68309
0.5	Rendering 1	dataset09.01.2023	sieć mobilna B	MobileNet V3 Large	224	2	1	Flip	650	0	5000	0	115	0	0	115	0	Tak	ExponentialDecay	Adam	1e-05	decay_steps=100000, decay_rate=0.96,	Tak	0.471164	4.22284	24.5608	0.438037	0.833236	6.17784	58.0077	1.31014	0.80656	5.7536	58.5181	1.23931	0.33708	3.0523	17.6411	0.225694	0.847682	6.24343	66.4844	1.17752	0.785192	5.68247	58.0698	1.07576
0.5	Rendering 1	dataset09.01.2023	sieć mobilna B	MobileNet V3 Large	224	2	1	Flip	650	0	2500	0	115	0	0	115	0	Tak	ExponentialDecay	Adam	1e-05	decay_steps=100000, decay_rate=0.96,	Tak	0.588712	5.06595	32.0251	0.648352	0.767476	5.74408	52.256	1.16771	0.768292	5.49765	55.0308	1.14261	0.435648	3.85233	23.313	0.37739	0.853923	6.43326	53.7534	1.39752	0.804558	5.91982	49.7825	1.30233
0.5	Rendering 1	dataset09.01.2023	sieć mobilna B	MobileNet V3 Large	224	2	1	Flip	650	0	0	0	115	0	0	115	0	Tak	ExponentialDecay	Adam	1e-05	decay_steps=100000, decay_rate=0.96,	Tak	0.629757	3.92989	42.8909	0.661542	1.16068	8.16157	54.5854	2.50625	1.42559	10.3071	54.4913	3.49433	0.530394	3.36857	36.8837	0.466119	0.96676	6.712	46.4969	1.64044	1.20177	8.61508	49.8247	2.67887
0.5	Rendering 1	dataset09.01.2023	sieć mobilna B	MobileNet V3 Large	224	2	1	Flip	650	0	5000	0	115	0	0	115	0	Tak	ExponentialDecay	Adam	0.001	decay_steps=100000, decay_rate=0.96,	Tak	0.214374	2.00554	10.7044	0.0975855	0.657945	4.98748	55.8665	0.82365	0.595578	4.29242	53.2828	0.72599	0.168275	1.57575	8.49192	0.064514	0.964885	7.26968	51.0998	1.72615	0.900994	6.56085	45.9131	1.56604
0.5	Rendering 1	dataset09.01.2023	sieć mobilna B	MobileNet V3 Large	224	2	1	Flip	650	0	2500	0	115	0	0	115	0	Tak	ExponentialDecay	Adam	0.001	decay_steps=100000, decay_rate=0.96,	Tak	0.271495	2.48538	14.1318	0.157524	0.774308	5.98072	45.8754	1.22388	0.903943	7.50136	40.512	1.66034	0.218722	2.0474	10.991	0.100703	0.64906	4.89402	37.936	0.784556	0.794184	6.43762	39.3446	1.39485
0.5	Rendering 1	dataset09.01.2023	sieć mobilna B	MobileNet V3 Large	224	2	1	Flip	650	0	0	0	115	0	0	115	0	Tak	ExponentialDecay	Adam	0.001	decay_steps=100000, decay_rate=0.96,	Tak	0.312291	2.07217	21.3656	0.170466	0.970422	7.23037	41.7156	1.88541	1.23038	9.46154	46.3176	2.75572	0.26795	1.8295	17.4271	0.133096	0.862145	6.20929	40.9433	1.39349	1.00337	7.67793	40.6718	2.13462
0.5	Rendering 1	dataset09.01.2023	sieć mobilna B	MobileNet V3 Large	224	1.66667	1	Flip	650	0	5000	0	115	0	0	115	0	Tak	PiecewiseConstantDecay	RMSprop	1e-05	decay_steps=100000, decay_rate=0.96,	Tak	0.747991	6.47291	39.5848	1.05793	1.02131	7.71049	52.9512	1.85304	1.03889	7.74078	64.5088	1.99898	0.725503	6.23333	38.4034	1.00217	0.975521	7.38076	58.4218	1.65244	0.942549	6.70828	60.8595	1.50005
0.5	Rendering 1	dataset09.01.2023	sieć mobilna B	MobileNet V3 Large	224	1.66667	1	Flip	650	0	2500	0	115	0	0	115	0	Tak	PiecewiseConstantDecay	RMSprop	1e-05	decay_steps=100000, decay_rate=0.96,	Tak	0.821839	6.69484	45.1799	1.24616	1.10611	8.18288	50.2181	2.31192	1.07649	8.00082	59.291	2.25768	0.802776	6.57104	43.2736	1.2122	1.05977	8.02774	54.736	2.10784	1.01188	7.12859	56.0776	1.85774
0.5	Rendering 1	dataset09.01.2023	sieć mobilna B	MobileNet V3 Large	224	1.66667	1	Flip	650	0	0	0	115	0	0	115	0	Tak	PiecewiseConstantDecay	RMSprop	1e-05	decay_steps=100000, decay_rate=0.96,	Tak	1.01242	5.86831	67.3042	1.72188	1.57237	10.1515	63.68	3.91342	1.42388	9.51477	63.7499	3.59784	1.05094	6.22988	73.7729	1.81336	1.49845	9.78605	64.0328	3.68576	1.53395	9.41597	68.666	3.51862
0.5	Rendering 1	dataset09.01.2023	sieć mobilna B	MobileNet V3 Large	224	1.66667	1	Flip	650	0	5000	0	115	0	0	115	0	Tak	PiecewiseConstantDecay	RMSprop	1e-05	decay_steps=100000, decay_rate=0.96,	Nie	0.747991	6.47291	39.5848	1.05793	1.02131	7.71049	52.9512	1.85304	1.03889	7.74078	64.5088	1.99898	0.725503	6.23333	38.4034	1.00217	0.975521	7.38076	58.4218	1.65244	0.942549	6.70828	60.8595	1.50005
0.5	Rendering 1	dataset09.01.2023	sieć mobilna B	MobileNet V3 Large	224	1.66667	1	Flip	650	0	2500	0	115	0	0	115	0	Tak	PiecewiseConstantDecay	RMSprop	1e-05	decay_steps=100000, decay_rate=0.96,	Nie	0.821839	6.69484	45.1799	1.24616	1.10611	8.18288	50.2181	2.31192	1.07649	8.00082	59.291	2.25768	0.802776	6.57104	43.2736	1.2122	1.05977	8.02774	54.736	2.10784	1.01188	7.12859	56.0776	1.85774
0.5	Rendering 1	dataset09.01.2023	sieć mobilna B	MobileNet V3 Large	224	1.66667	1	Flip	650	0	0	0	115	0	0	115	0	Tak	PiecewiseConstantDecay	RMSprop	1e-05	decay_steps=100000, decay_rate=0.96,	Nie	1.01242	5.86831	67.3042	1.72188	1.57237	10.1515	63.68	3.91342	1.42388	9.51477	63.7499	3.59784	1.05094	6.22988	73.7729	1.81336	1.49845	9.78605	64.0328	3.68576	1.53395	9.41597	68.666	3.51862
0.5	Rendering 1	dataset09.01.2023	sieć mobilna B	MobileNet V3 Large	224	1.66667	1	Flip	650	0	5000	0	115	0	0	115	0	Tak	PiecewiseConstantDecay	RMSprop	0.001	decay_steps=100000, decay_rate=0.96,	Tak	0.239076	2.23932	11.9568	0.121557	0.971627	7.12827	42.9227	1.45574	0.870386	6.69176	39.1655	1.32217	0.234715	2.20829	11.7583	0.113927	0.914948	6.89813	41.8575	1.39064	0.833484	5.9998	39.4026	1.09653
0.5	Rendering 1	dataset09.01.2023	sieć mobilna B	MobileNet V3 Large	224	1.66667	1	Flip	650	0	2500	0	115	0	0	115	0	Tak	PiecewiseConstantDecay	RMSprop	0.001	decay_steps=100000, decay_rate=0.96,	Tak	0.266091	2.42184	13.8116	0.145482	1.04017	7.68609	44.7724	1.79597	0.943327	7.30168	41.3174	1.6452	0.251109	2.26951	12.9609	0.131132	1.01182	7.61367	45.0977	1.83363	0.913184	6.58374	42.1885	1.4193
0.5	Rendering 1	dataset09.01.2023	sieć mobilna B	MobileNet V3 Large	224	1.66667	1	Flip	650	0	0	0	115	0	0	115	0	Tak	PiecewiseConstantDecay	RMSprop	0.001	decay_steps=100000, decay_rate=0.96,	Tak	0.307046	2.04039	20.4045	0.165763	0.914931	6.95412	39.8003	1.5001	0.795623	6.36058	36.9628	1.35313	0.279364	1.90016	18.5943	0.142468	0.772977	6.18563	35.6655	1.2387	0.700008	5.2648	33.8913	0.933462
0.5	Rendering 1	dataset09.01.2023	sieć mobilna B	MobileNet V3 Large	224	1.66667	1	Flip	650	0	5000	0	115	0	0	115	0	Tak	PiecewiseConstantDecay	RMSprop	0.001	decay_steps=100000, decay_rate=0.96,	Nie	0.239076	2.23932	11.9568	0.121557	0.971627	7.12827	42.9227	1.45574	0.870386	6.69176	39.1655	1.32217	0.234715	2.20829	11.7583	0.113927	0.914948	6.89813	41.8575	1.39064	0.833484	5.9998	39.4026	1.09653
0.5	Rendering 1	dataset09.01.2023	sieć mobilna B	MobileNet V3 Large	224	1.66667	1	Flip	650	0	2500	0	115	0	0	115	0	Tak	PiecewiseConstantDecay	RMSprop	0.001	decay_steps=100000, decay_rate=0.96,	Nie	0.266091	2.42184	13.8116	0.145482	1.04017	7.68609	44.7724	1.79597	0.943327	7.30168	41.3174	1.6452	0.251109	2.26951	12.9609	0.131132	1.01182	7.61367	45.0977	1.83363	0.913184	6.58374	42.1885	1.4193
0.5	Rendering 1	dataset09.01.2023	sieć mobilna B	MobileNet V3 Large	224	1.66667	1	Flip	650	0	0	0	115	0	0	115	0	Tak	PiecewiseConstantDecay	RMSprop	0.001	decay_steps=100000, decay_rate=0.96,	Nie	0.307046	2.04039	20.4045	0.165763	0.914931	6.95412	39.8003	1.5001	0.795623	6.36058	36.9628	1.35313	0.279364	1.90016	18.5943	0.142468	0.772977	6.18563	35.6655	1.2387	0.700008	5.2648	33.8913	0.933462
0.5	Rendering 1	dataset09.01.2023	sieć mobilna B	MobileNet V3 Large	224	2	1	Flip	650	0	5000	0	115	0	0	115	0	Tak	ExponentialDecay	RMSprop	1e-05	decay_steps=100000, decay_rate=0.96,	Tak	0.386422	3.55537	19.7256	0.309935	1.95158	15.8054	283.731	4.87152	1.67111	12.7172	230.136	3.60415	0.310943	2.88316	15.846	0.200344	2.12441	18.3585	298.342	5.61097	1.91225	15.6097	267.094	4.54054
0.5	Rendering 1	dataset09.01.2023	sieć mobilna B	MobileNet V3 Large	224	2	1	Flip	650	0	2500	0	115	0	0	115	0	Tak	ExponentialDecay	RMSprop	1e-05	decay_steps=100000, decay_rate=0.96,	Tak	0.499175	4.39394	26.6815	0.474253	1.17056	8.51437	151.422	2.09731	0.984949	7.53776	98.8198	1.41358	0.375448	3.32684	20.2481	0.276577	1.5987	12.2541	224.612	3.35937	1.48255	11.6154	180.298	2.76238
0.5	Rendering 1	dataset09.01.2023	sieć mobilna B	MobileNet V3 Large	224	2	1	Flip	650	0	0	0	115	0	0	115	0	Tak	ExponentialDecay	RMSprop	1e-05	decay_steps=100000, decay_rate=0.96,	Tak	0.490097	3.13001	33.9324	0.407343	1.09337	7.8295	47.9648	2.22294	1.32175	9.79884	51.1607	2.94695	0.43079	2.7626	29.2617	0.31072	0.922332	6.51162	43.4152	1.56202	1.19538	8.60357	49.1772	2.62705
0.5	Rendering 1	dataset09.01.2023	sieć mobilna B	MobileNet V3 Large	224	2	1	Flip	650	0	5000	0	115	0	0	115	0	Tak	ExponentialDecay	RMSprop	0.001	decay_steps=100000, decay_rate=0.96,	Tak	0.213386	2.0123	10.5173	0.102991	0.946416	6.82125	50.6767	1.5843	0.862276	6.04008	49.6074	1.30985	0.161561	1.54142	7.92915	0.0595432	1.20637	8.41273	53.3139	2.36833	1.10892	7.65442	49.6621	2.01256
0.5	Rendering 1	dataset09.01.2023	sieć mobilna B	MobileNet V3 Large	224	2	1	Flip	650	0	2500	0	115	0	0	115	0	Tak	ExponentialDecay	RMSprop	0.001	decay_steps=100000, decay_rate=0.96,	Tak	0.287566	2.60139	14.6456	0.174843	0.776827	5.91222	38.5443	1.0704	1.00417	7.84862	42.4465	1.64295	0.22663	2.11762	11.1645	0.113527	0.637932	4.83304	36.0536	0.791693	0.793142	6.19213	38.3499	1.26457
0.5	Rendering 1	dataset09.01.2023	sieć mobilna B	MobileNet V3 Large	224	2	1	Flip	650	0	0	0	115	0	0	115	0	Tak	ExponentialDecay	RMSprop	0.001	decay_steps=100000, decay_rate=0.96,	Tak	0.424598	2.80737	28.4996	0.320836	0.976504	7.19339	42.6252	1.7515	1.29687	9.70578	50.9523	2.70265	0.320879	2.13966	21.0084	0.183022	0.862555	6.26498	38.8192	1.42307	1.00794	7.72918	39.4031	2.06476
0.5	Rendering 1	dataset09.01.2023	sieć mobilna B	MobileNet V3 Large	224	1.66667	4	Flip, rotation	650	0	5000	0	115	0	0	115	0	Tak	PiecewiseConstantDecay	Adam	1e-05	decay_steps=100000, decay_rate=0.96,	Tak	1.04993	8.37957	52.4161	2.04702	1.16729	8.41403	63.7106	2.59951	1.06872	7.56338	55.0162	2.14581	1.01805	8.22743	52.162	1.92159	1.16476	8.32469	57.1529	2.40527	1.10687	7.62103	61.1447	2.17155
0.5	Rendering 1	dataset09.01.2023	sieć mobilna B	MobileNet V3 Large	224	1.66667	4	Flip, rotation	650	0	2500	0	115	0	0	115	0	Tak	PiecewiseConstantDecay	Adam	1e-05	decay_steps=100000, decay_rate=0.96,	Tak	1.16657	8.97292	61.2054	2.47398	1.43895	9.41305	66.7487	3.59381	1.27754	8.19471	56.8173	2.93629	1.12317	8.73839	59.4787	2.23671	1.37047	9.05907	62.3633	3.24283	1.29822	8.21253	65.1922	2.70068
0.5	Rendering 1	dataset09.01.2023	sieć mobilna B	MobileNet V3 Large	224	1.66667	4	Flip, rotation	650	0	0	0	115	0	0	115	0	Tak	PiecewiseConstantDecay	Adam	1e-05	decay_steps=100000, decay_rate=0.96,	Tak	1.27534	6.8221	80.893	2.77244	1.2271	8.51624	87.1661	2.51945	1.13194	7.75617	70.4333	2.37834	1.17979	6.36748	71.8693	2.32589	1.26066	8.78043	80.6487	2.94941	1.02163	6.89418	75.7575	1.86498
0.5	Rendering 1	dataset09.01.2023	sieć mobilna B	MobileNet V3 Large	224	1.66667	4	Flip, rotation	650	0	5000	0	115	0	0	115	0	Tak	PiecewiseConstantDecay	Adam	1e-05	decay_steps=100000, decay_rate=0.96,	Nie	1.04993	8.37957	52.4161	2.04702	1.16729	8.41403	63.7106	2.59951	1.06872	7.56338	55.0162	2.14581	1.01805	8.22743	52.162	1.92159	1.16476	8.32469	57.1529	2.40527	1.10687	7.62103	61.1447	2.17155
0.5	Rendering 1	dataset09.01.2023	sieć mobilna B	MobileNet V3 Large	224	1.66667	4	Flip, rotation	650	0	2500	0	115	0	0	115	0	Tak	PiecewiseConstantDecay	Adam	1e-05	decay_steps=100000, decay_rate=0.96,	Nie	1.16657	8.97292	61.2054	2.47398	1.43895	9.41305	66.7487	3.59381	1.27754	8.19471	56.8173	2.93629	1.12317	8.73839	59.4787	2.23671	1.37047	9.05907	62.3633	3.24283	1.29822	8.21253	65.1922	2.70068
0.5	Rendering 1	dataset09.01.2023	sieć mobilna B	MobileNet V3 Large	224	1.66667	4	Flip, rotation	650	0	0	0	115	0	0	115	0	Tak	PiecewiseConstantDecay	Adam	1e-05	decay_steps=100000, decay_rate=0.96,	Nie	1.27534	6.8221	80.893	2.77244	1.2271	8.51624	87.1661	2.51945	1.13194	7.75617	70.4333	2.37834	1.17979	6.36748	71.8693	2.32589	1.26066	8.78043	80.6487	2.94941	1.02163	6.89418	75.7575	1.86498
0.5	Rendering 1	dataset09.01.2023	sieć mobilna B	MobileNet V3 Large	224	1.66667	4	Flip, rotation	650	0	5000	0	115	0	0	115	0	Tak	PiecewiseConstantDecay	Adam	0.001	decay_steps=100000, decay_rate=0.96,	Tak	0.333338	3.08938	16.5811	0.238467	0.883308	6.71588	50.2726	1.40548	0.804295	5.92561	50.08	1.20951	0.33327	3.08967	16.531	0.237879	0.855141	6.65527	46.3281	1.30911	0.779514	5.72202	49.8777	1.05798
0.5	Rendering 1	dataset09.01.2023	sieć mobilna B	MobileNet V3 Large	224	1.66667	4	Flip, rotation	650	0	2500	0	115	0	0	115	0	Tak	PiecewiseConstantDecay	Adam	0.001	decay_steps=100000, decay_rate=0.96,	Tak	0.421547	3.70966	21.685	0.358788	1.03607	7.36444	58.1578	1.83457	1.06316	7.22419	66.3672	1.81378	0.413285	3.66193	21.7539	0.350609	1.04898	7.43039	56.7923	1.74537	0.997993	6.68954	62.9561	1.52782
0.5	Rendering 1	dataset09.01.2023	sieć mobilna B	MobileNet V3 Large	224	1.66667	4	Flip, rotation	650	0	0	0	115	0	0	115	0	Tak	PiecewiseConstantDecay	Adam	0.001	decay_steps=100000, decay_rate=0.96,	Tak	0.628269	4.0323	37.0494	0.72609	1.08144	7.79482	47.4916	2.18695	1.03977	7.25388	47.6591	1.87884	0.613061	4.00154	36.4677	0.719056	1.12383	8.03463	49.6774	2.2043	1.02262	7.0407	48.2038	1.82416
0.5	Rendering 1	dataset09.01.2023	sieć mobilna B	MobileNet V3 Large	224	1.66667	4	Flip, rotation	650	0	5000	0	115	0	0	115	0	Tak	PiecewiseConstantDecay	Adam	0.001	decay_steps=100000, decay_rate=0.96,	Nie	0.333338	3.08938	16.5811	0.238467	0.883308	6.71588	50.2726	1.40548	0.804295	5.92561	50.08	1.20951	0.33327	3.08967	16.531	0.237879	0.855141	6.65527	46.3281	1.30911	0.779514	5.72202	49.8777	1.05798
0.5	Rendering 1	dataset09.01.2023	sieć mobilna B	MobileNet V3 Large	224	1.66667	4	Flip, rotation	650	0	2500	0	115	0	0	115	0	Tak	PiecewiseConstantDecay	Adam	0.001	decay_steps=100000, decay_rate=0.96,	Nie	0.421547	3.70966	21.685	0.358788	1.03607	7.36444	58.1578	1.83457	1.06316	7.22419	66.3672	1.81378	0.413285	3.66193	21.7539	0.350609	1.04898	7.43039	56.7923	1.74537	0.997993	6.68954	62.9561	1.52782
0.5	Rendering 1	dataset09.01.2023	sieć mobilna B	MobileNet V3 Large	224	1.66667	4	Flip, rotation	650	0	0	0	115	0	0	115	0	Tak	PiecewiseConstantDecay	Adam	0.001	decay_steps=100000, decay_rate=0.96,	Nie	0.628269	4.0323	37.0494	0.72609	1.08144	7.79482	47.4916	2.18695	1.03977	7.25388	47.6591	1.87884	0.613061	4.00154	36.4677	0.719056	1.12383	8.03463	49.6774	2.2043	1.02262	7.0407	48.2038	1.82416
0.5	Rendering 1	dataset09.01.2023	sieć mobilna B	MobileNet V3 Large	224	2	4	Flip, rotation	650	0	5000	0	115	0	0	115	0	Tak	ExponentialDecay	Adam	1e-05	decay_steps=100000, decay_rate=0.96,	Tak	0.558441	4.96432	28.3668	0.645088	0.768226	5.62119	43.6401	1.20413	0.906709	6.88407	46.746	1.59451	0.41638	3.78599	21.0938	0.367488	0.830419	6.18834	38.2029	1.34081	0.80215	5.94024	40.785	1.25812
0.5	Rendering 1	dataset09.01.2023	sieć mobilna B	MobileNet V3 Large	224	2	4	Flip, rotation	650	0	2500	0	115	0	0	115	0	Tak	ExponentialDecay	Adam	1e-05	decay_steps=100000, decay_rate=0.96,	Tak	0.733882	6.121	38.6059	1.07737	0.87469	6.14089	49.1381	1.52345	1.02122	7.58058	50.6748	1.96125	0.559102	4.83137	29.2278	0.628895	0.828895	6.14219	40.8183	1.40033	0.808044	6.04458	42.787	1.29783
0.5	Rendering 1	dataset09.01.2023	sieć mobilna B	MobileNet V3 Large	224	2	4	Flip, rotation	650	0	0	0	115	0	0	115	0	Tak	ExponentialDecay	Adam	1e-05	decay_steps=100000, decay_rate=0.96,	Tak	0.845679	5.17141	55.546	1.23574	0.816836	5.62835	66.755	1.18718	0.888678	6.65995	64.0554	1.44803	0.725181	4.51399	48.3929	0.945017	0.917331	6.69317	54.3936	1.68401	0.95388	6.82366	58.0085	1.72805
0.5	Rendering 1	dataset09.01.2023	sieć mobilna B	MobileNet V3 Large	224	2	4	Flip, rotation	650	0	5000	0	115	0	0	115	0	Tak	ExponentialDecay	Adam	0.001	decay_steps=100000, decay_rate=0.96,	Tak	0.302205	2.83627	14.9497	0.195885	0.702101	5.16588	47.5976	0.893693	0.767607	6.01168	42.2257	1.11885	0.393018	3.72139	18.7889	0.357094	0.70468	5.41733	46.6661	0.976554	0.715257	5.46523	50.0276	1.01043
0.5	Rendering 1	dataset09.01.2023	sieć mobilna B	MobileNet V3 Large	224	2	4	Flip, rotation	650	0	2500	0	115	0	0	115	0	Tak	ExponentialDecay	Adam	0.001	decay_steps=100000, decay_rate=0.96,	Tak	0.376365	3.42076	19.0615	0.3014	0.784927	5.81052	58.982	1.1815	0.861632	6.70448	54.9487	1.42653	0.326283	3.00463	16.154	0.238229	0.78716	6.09269	53.7565	1.27806	0.870081	6.50308	61.1257	1.44342
0.5	Rendering 1	dataset09.01.2023	sieć mobilna B	MobileNet V3 Large	224	2	4	Flip, rotation	650	0	0	0	115	0	0	115	0	Tak	ExponentialDecay	Adam	0.001	decay_steps=100000, decay_rate=0.96,	Tak	0.392177	2.6005	25.0524	0.278716	0.742921	5.35038	39.6672	1.02653	0.902465	6.86555	40.2552	1.64665	0.339767	2.33456	21.7426	0.23318	0.748378	5.72056	32.7398	1.20838	0.731213	5.47061	34.9096	1.08195
0.5	Rendering 1	dataset09.01.2023	sieć mobilna B	MobileNet V3 Large	224	1.66667	4	Flip, rotation	650	0	5000	0	115	0	0	115	0	Tak	PiecewiseConstantDecay	RMSprop	1e-05	decay_steps=100000, decay_rate=0.96,	Tak	0.873644	7.28119	45.1844	1.4382	1.12515	8.27095	105.567	2.00756	1.00027	7.247	88.9836	1.52484	0.843665	7.09653	44.0962	1.3592	1.05162	7.92952	83.6151	1.68913	1.05715	7.62342	104.355	1.77611
0.5	Rendering 1	dataset09.01.2023	sieć mobilna B	MobileNet V3 Large	224	1.66667	4	Flip, rotation	650	0	2500	0	115	0	0	115	0	Tak	PiecewiseConstantDecay	RMSprop	1e-05	decay_steps=100000, decay_rate=0.96,	Tak	0.976076	7.71528	51.1931	1.76187	1.09776	7.94566	75.3577	2.26179	1.06015	7.40179	73.3731	1.9044	0.977822	7.80962	50.195	1.78179	1.10345	7.93489	68.4825	2.12004	1.0315	7.13786	76.8757	1.85451
0.5	Rendering 1	dataset09.01.2023	sieć mobilna B	MobileNet V3 Large	224	1.66667	4	Flip, rotation	650	0	0	0	115	0	0	115	0	Tak	PiecewiseConstantDecay	RMSprop	1e-05	decay_steps=100000, decay_rate=0.96,	Tak	1.24443	6.79264	81.3425	2.58997	1.46118	9.95335	96.1271	3.32607	1.32795	8.64757	75.3743	3.02564	1.23829	7.04498	85.5807	2.56661	1.34893	9.20201	82.465	2.96575	1.24788	8.12365	81.7382	2.49565
0.5	Rendering 1	dataset09.01.2023	sieć mobilna B	MobileNet V3 Large	224	1.66667	4	Flip, rotation	650	0	5000	0	115	0	0	115	0	Tak	PiecewiseConstantDecay	RMSprop	1e-05	decay_steps=100000, decay_rate=0.96,	Nie	0.873644	7.28119	45.1844	1.4382	1.12515	8.27095	105.567	2.00756	1.00027	7.247	88.9836	1.52484	0.843665	7.09653	44.0962	1.3592	1.05162	7.92952	83.6151	1.68913	1.05715	7.62342	104.355	1.77611
0.5	Rendering 1	dataset09.01.2023	sieć mobilna B	MobileNet V3 Large	224	1.66667	4	Flip, rotation	650	0	2500	0	115	0	0	115	0	Tak	PiecewiseConstantDecay	RMSprop	1e-05	decay_steps=100000, decay_rate=0.96,	Nie	0.976076	7.71528	51.1931	1.76187	1.09776	7.94566	75.3577	2.26179	1.06015	7.40179	73.3731	1.9044	0.977822	7.80962	50.195	1.78179	1.10345	7.93489	68.4825	2.12004	1.0315	7.13786	76.8757	1.85451
0.5	Rendering 1	dataset09.01.2023	sieć mobilna B	MobileNet V3 Large	224	1.66667	4	Flip, rotation	650	0	0	0	115	0	0	115	0	Tak	PiecewiseConstantDecay	RMSprop	1e-05	decay_steps=100000, decay_rate=0.96,	Nie	1.24443	6.79264	81.3425	2.58997	1.46118	9.95335	96.1271	3.32607	1.32795	8.64757	75.3743	3.02564	1.23829	7.04498	85.5807	2.56661	1.34893	9.20201	82.465	2.96575	1.24788	8.12365	81.7382	2.49565
0.5	Rendering 1	dataset09.01.2023	sieć mobilna B	MobileNet V3 Large	224	1.66667	4	Flip, rotation	650	0	5000	0	115	0	0	115	0	Tak	PiecewiseConstantDecay	RMSprop	0.001	decay_steps=100000, decay_rate=0.96,	Tak	0.270427	2.5234	13.7108	0.156859	0.927101	6.92889	53.7462	1.48927	0.908721	6.58816	57.4573	1.39536	0.255022	2.38851	12.8385	0.142593	0.913511	6.77009	50.726	1.40293	0.861049	6.14559	55.4382	1.27055
0.5	Rendering 1	dataset09.01.2023	sieć mobilna B	MobileNet V3 Large	224	1.66667	4	Flip, rotation	650	0	2500	0	115	0	0	115	0	Tak	PiecewiseConstantDecay	RMSprop	0.001	decay_steps=100000, decay_rate=0.96,	Tak	0.340696	3.12006	17.3657	0.253661	1.23964	8.56845	58.7334	2.4614	1.20221	8.05306	58.7032	2.22959	0.319268	2.89894	16.1124	0.223734	1.23175	8.60214	55.2876	2.4434	1.14052	7.59383	57.9312	2.00411
0.5	Rendering 1	dataset09.01.2023	sieć mobilna B	MobileNet V3 Large	224	1.66667	4	Flip, rotation	650	0	0	0	115	0	0	115	0	Tak	PiecewiseConstantDecay	RMSprop	0.001	decay_steps=100000, decay_rate=0.96,	Tak	0.58069	3.83855	37.3709	0.649944	1.11686	8.08712	45.5607	2.37462	1.096	7.65612	48.2245	2.10146	0.53106	3.54261	32.1072	0.545054	1.19779	8.53426	48.9308	2.55544	1.10939	7.51088	49.9615	2.13309
0.5	Rendering 1	dataset09.01.2023	sieć mobilna B	MobileNet V3 Large	224	1.66667	4	Flip, rotation	650	0	5000	0	115	0	0	115	0	Tak	PiecewiseConstantDecay	RMSprop	0.001	decay_steps=100000, decay_rate=0.96,	Nie	0.270427	2.5234	13.7108	0.156859	0.927101	6.92889	53.7462	1.48927	0.908721	6.58816	57.4573	1.39536	0.255022	2.38851	12.8385	0.142593	0.913511	6.77009	50.726	1.40293	0.861049	6.14559	55.4382	1.27055
0.5	Rendering 1	dataset09.01.2023	sieć mobilna B	MobileNet V3 Large	224	1.66667	4	Flip, rotation	650	0	2500	0	115	0	0	115	0	Tak	PiecewiseConstantDecay	RMSprop	0.001	decay_steps=100000, decay_rate=0.96,	Nie	0.340696	3.12006	17.3657	0.253661	1.23964	8.56845	58.7334	2.4614	1.20221	8.05306	58.7032	2.22959	0.319268	2.89894	16.1124	0.223734	1.23175	8.60214	55.2876	2.4434	1.14052	7.59383	57.9312	2.00411
0.5	Rendering 1	dataset09.01.2023	sieć mobilna B	MobileNet V3 Large	224	1.66667	4	Flip, rotation	650	0	0	0	115	0	0	115	0	Tak	PiecewiseConstantDecay	RMSprop	0.001	decay_steps=100000, decay_rate=0.96,	Nie	0.58069	3.83855	37.3709	0.649944	1.11686	8.08712	45.5607	2.37462	1.096	7.65612	48.2245	2.10146	0.53106	3.54261	32.1072	0.545054	1.19779	8.53426	48.9308	2.55544	1.10939	7.51088	49.9615	2.13309
0.5	Rendering 1	dataset09.01.2023	sieć mobilna B	MobileNet V3 Large	224	2	4	Flip, rotation	650	0	5000	0	115	0	0	115	0	Tak	ExponentialDecay	RMSprop	1e-05	decay_steps=100000, decay_rate=0.96,	Tak	0.515623	4.66458	26.0789	0.540582	1.24817	9.94211	140.497	2.22386	1.09485	9.09979	102.182	1.79714	0.396026	3.63243	20.1844	0.326693	1.20912	9.51976	135.419	2.11112	1.13894	9.16551	127.772	2.09866
0.5	Rendering 1	dataset09.01.2023	sieć mobilna B	MobileNet V3 Large	224	2	4	Flip, rotation	650	0	2500	0	115	0	0	115	0	Tak	ExponentialDecay	RMSprop	1e-05	decay_steps=100000, decay_rate=0.96,	Tak	0.607809	5.21369	32.0604	0.720679	1.00527	7.34435	106.384	1.4339	0.904927	6.85889	85.6975	1.29832	0.473906	4.1111	25.3979	0.441257	0.975551	7.41446	95.5301	1.41008	1.01831	7.46717	119.029	1.5235
0.5	Rendering 1	dataset09.01.2023	sieć mobilna B	MobileNet V3 Large	224	2	4	Flip, rotation	650	0	0	0	115	0	0	115	0	Tak	ExponentialDecay	RMSprop	1e-05	decay_steps=100000, decay_rate=0.96,	Tak	0.705503	4.49483	45.264	0.898004	0.969149	7.02414	60.9857	1.77639	0.951461	7.03274	48.8978	1.81244	0.689274	4.55514	44.5052	0.87593	1.07859	8.11846	48.0568	2.27296	1.01571	7.69636	52.0803	2.03005
0.5	Rendering 1	dataset09.01.2023	sieć mobilna B	MobileNet V3 Large	224	2	4	Flip, rotation	650	0	5000	0	115	0	0	115	0	Tak	ExponentialDecay	RMSprop	0.001	decay_steps=100000, decay_rate=0.96,	Tak	0.280311	2.64147	13.4922	0.191393	1.12044	8.03639	65.3515	2.10685	1.24688	9.47102	54.3611	2.45898	0.218687	2.0642	10.7143	0.108688	1.05516	7.07017	78.3308	1.61814	1.19259	8.53545	66.7993	2.16577
0.5	Rendering 1	dataset09.01.2023	sieć mobilna B	MobileNet V3 Large	224	2	4	Flip, rotation	650	0	2500	0	115	0	0	115	0	Tak	ExponentialDecay	RMSprop	0.001	decay_steps=100000, decay_rate=0.96,	Tak	0.317353	2.88666	16.2272	0.225414	1.14906	8.06322	51.5045	2.25641	1.20059	8.3634	52.9133	2.2886	0.329962	3.02578	16.4383	0.256878	1.20011	8.53316	53.06	2.34753	1.11208	8.10856	48.9669	2.10634
0.5	Rendering 1	dataset09.01.2023	sieć mobilna B	MobileNet V3 Large	224	2	4	Flip, rotation	650	0	0	0	115	0	0	115	0	Tak	ExponentialDecay	RMSprop	0.001	decay_steps=100000, decay_rate=0.96,	Tak	0.452433	3.0124	28.5741	0.38727	1.03967	7.37874	44.067	2.01792	1.09692	7.65344	47.6502	2.0302	0.366745	2.42628	23.8668	0.247023	1.26883	8.88357	53.1789	2.51692	1.12116	8.13966	47.0528	2.27686
0.5	Rendering 1	dataset09.01.2023	sieć mobilna A	MobileNet V3 Large	224		1	Gaussian noise (strength 0.05)	650	0	5000	0	115	0	0	115	0	Tak	CosineDecay	Adam	1		Tak	0.743	6.505	35.852	1.13	0.849	6.522	52.501	1.438	0.882	6.692	56.223	1.588	0.755	6.599	37.092	1.176	0.744	5.646	44.917	1.234	0.841	6.32	56.889	1.403
0.5	Rendering 1	dataset09.01.2023	sieć mobilna A	MobileNet V3 Large	224		1	Gaussian noise (strength 0.05)	650	0	2500	0	115	0	0	115	0	Tak	CosineDecay	Adam	1		Tak	0.659	5.678	34.198	0.892	0.863	6.597	49.71	1.632	0.89	6.706	51.061	1.639	0.668	5.766	33.456	0.926	0.853	6.461	49.586	1.543	0.888	6.549	54.273	1.625
0.5	Rendering 1	dataset09.01.2023	sieć mobilna A	MobileNet V3 Large	224		1	Gaussian noise (strength 0.05)	650	0	0	0	115	0	0	115	0	Tak	CosineDecay	Adam	1		Tak	0.587	3.76	37.046	0.632	0.821	6.211	49.752	1.343	0.921	6.9	56.873	1.572	0.599	3.879	37.857	0.65	0.915	6.749	56.066	1.515	0.87	6.386	58.455	1.368
0.5	Rendering 1	dataset09.01.2023	sieć mobilna A	MobileNet V3 Large	224		1	Gaussian noise (strength 0.05)	650	0	5000	0	115	0	0	115	0	Tak	CosineDecay	Adam	1		Nie	0.29	2.658	14.941	0.17	0.822	6.262	71.459	1.221	0.727	5.552	60.207	0.951	0.287	2.657	14.731	0.169	0.745	5.558	63.65	1.043	0.821	6.091	81.5	1.189
0.5	Rendering 1	dataset09.01.2023	sieć mobilna A	MobileNet V3 Large	224		1	Gaussian noise (strength 0.05)	650	0	2500	0	115	0	0	115	0	Tak	CosineDecay	Adam	1		Nie	0.235	2.12	12.368	0.111	0.534	4.246	38.153	0.568	0.518	4.122	38.046	0.593	0.233	2.103	12.286	0.11	0.534	4.093	40.038	0.553	0.464	3.586	36.109	0.468
0.5	Rendering 1	dataset09.01.2023	sieć mobilna A	MobileNet V3 Large	224		1	Gaussian noise (strength 0.05)	650	0	0	0	115	0	0	115	0	Tak	CosineDecay	Adam	1		Nie	0.265	1.809	17.252	0.121	0.961	7.151	40.067	1.872	0.97	7.264	39.988	1.871	0.225	1.535	14.677	0.094	0.92	6.93	37.939	1.72	0.912	6.804	38.769	1.652
0.5	Rendering 1	dataset09.01.2023	sieć mobilna B	MobileNet V3 Large	224	#NAME?	1	Gaussian noise (strength 0.05)	650	0	5000	0	115	0	0	115	0	Tak	PiecewiseConstantDecay	Adam	1e-05	decay_steps=100000, decay_rate=0.96,	Nie	0.75441	6.41644	40.6446	1.06236	1.29134	9.14882	55.8754	2.88188	1.20043	8.67657	52.1076	2.71303	0.744101	6.33111	39.4171	1.04948	1.25918	9.0358	54.9328	2.92826	1.13675	8.07581	52.1389	2.3021
0.5	Rendering 1	dataset09.01.2023	sieć mobilna B	MobileNet V3 Large	224	#NAME?	1	Gaussian noise (strength 0.05)	650	0	2500	0	115	0	0	115	0	Tak	PiecewiseConstantDecay	Adam	1e-05	decay_steps=100000, decay_rate=0.96,	Nie	0.957266	7.57423	53.5898	1.65143	1.09628	7.95087	54.3444	2.0917	1.06545	7.75967	54.3197	2.11697	0.943213	7.49111	52.2721	1.63706	1.08587	7.96601	55.2383	2.04429	1.0792	7.76024	54.0173	2.20425
0.5	Rendering 1	dataset09.01.2023	sieć mobilna B	MobileNet V3 Large	224	#NAME?	1	Gaussian noise (strength 0.05)	650	0	0	0	115	0	0	115	0	Tak	PiecewiseConstantDecay	Adam	1e-05	decay_steps=100000, decay_rate=0.96,	Nie	1.2524	7.04243	86.9906	2.44319	1.69623	10.5179	68.7462	4.36406	1.54106	9.64268	71.6908	3.72107	1.14246	6.60037	78.9484	2.11634	1.58877	10.0945	68.2792	4.09816	1.60293	9.89649	71.9281	4.04925
0.5	Rendering 1	dataset09.01.2023	sieć mobilna B	MobileNet V3 Large	224	#NAME?	1	Gaussian noise (strength 0.05)	650	0	5000	0	115	0	0	115	0	Tak	PiecewiseConstantDecay	Adam	0.001	decay_steps=100000, decay_rate=0.96,	Nie	0.279884	2.63191	14.1557	0.167578	0.934364	7.21164	62.2852	1.4966	0.870085	6.35664	61.7725	1.28216	0.255113	2.38443	12.8977	0.138501	0.925496	6.97078	69.5782	1.42542	1.0219	7.60646	79.1587	1.60353
0.5	Rendering 1	dataset09.01.2023	sieć mobilna B	MobileNet V3 Large	224	#NAME?	1	Gaussian noise (strength 0.05)	650	0	2500	0	115	0	0	115	0	Tak	PiecewiseConstantDecay	Adam	0.001	decay_steps=100000, decay_rate=0.96,	Nie	0.339892	3.08818	17.4868	0.233544	0.902451	6.78251	66.1703	1.40629	0.867728	6.59384	57.0028	1.36496	0.318723	2.90424	16.7448	0.206112	0.971993	7.24011	68.2013	1.57569	0.860325	6.45297	61.4798	1.38029
0.5	Rendering 1	dataset09.01.2023	sieć mobilna B	MobileNet V3 Large	224	#NAME?	1	Gaussian noise (strength 0.05)	650	0	0	0	115	0	0	115	0	Tak	PiecewiseConstantDecay	Adam	0.001	decay_steps=100000, decay_rate=0.96,	Nie	0.374254	2.57655	24.8799	0.24381	1.06049	8.05299	44.8057	2.2332	1.0229	7.81291	45.1039	2.15258	0.353272	2.30336	22.9332	0.211037	1.08722	8.13396	46.4505	2.38872	0.998503	7.54503	42.4848	2.08072
0.5	Rendering 1	dataset09.01.2023	sieć mobilna B	MobileNet V3 Large	224		1	Gaussian noise (strength 0.05)	650	0	5000	0	115	0	0	115	0	Nie	PiecewiseConstantDecay	Adam		decay_steps=100000, decay_rate=0.96,	Tak	0.315962	2.83094	17.0408	0.203523	0.82682	5.61217	66.4497	1.25224	1.02165	7.72188	57.43	1.8074	0.308392	2.7871	16.555	0.198811	0.902369	6.47759	56.1281	1.38852	0.93048	6.77038	69.9885	1.62072
0.5	Rendering 1	dataset09.01.2023	sieć mobilna B	MobileNet V3 Large	224		1	Gaussian noise (strength 0.05)	650	0	2500	0	115	0	0	115	0	Nie	PiecewiseConstantDecay	Adam		decay_steps=100000, decay_rate=0.96,	Tak	0.405397	3.51782	22.0592	0.33761	0.816061	5.55162	67.6747	1.36045	0.976487	7.49287	50.1847	1.71951	0.374736	3.25853	20.8199	0.279776	0.915784	6.54125	57.3102	1.5464	0.901028	6.40802	66.1743	1.50727
0.5	Rendering 1	dataset09.01.2023	sieć mobilna B	MobileNet V3 Large	224		1	Gaussian noise (strength 0.05)	650	0	0	0	115	0	0	115	0	Nie	PiecewiseConstantDecay	Adam		decay_steps=100000, decay_rate=0.96,	Tak	0.424759	2.64384	31.3337	0.305809	0.901248	5.94103	77.8253	1.5377	1.10548	8.20979	57.3228	2.30753	0.428286	2.74169	30.2954	0.330563	1.07098	7.43715	78.8687	2.01425	1.08187	7.5899	84.5515	2.02531
0.5	Rendering 1	dataset09.01.2023	sieć mobilna B	MobileNet V3 Large	224		1	Gaussian noise (strength 0.05)	650	0	5000	0	115	0	0	115	0	Nie	PiecewiseConstantDecay	Adam		decay_steps=100000, decay_rate=0.96,	Tak	0.135052	1.25603	6.97037	0.0392916	0.771453	5.41987	48.6122	1.32536	1.13575	8.6616	49.2639	2.4691	0.119887	1.13399	6.0559	0.0327334	0.957863	6.9929	46.6387	1.9347	0.958513	7.08622	53.624	1.94044
0.5	Rendering 1	dataset09.01.2023	sieć mobilna B	MobileNet V3 Large	224		1	Gaussian noise (strength 0.05)	650	0	2500	0	115	0	0	115	0	Nie	PiecewiseConstantDecay	Adam		decay_steps=100000, decay_rate=0.96,	Tak	0.133863	1.21952	7.0762	0.0401536	0.747438	5.17618	54.6566	1.07811	0.98242	7.61065	47.4819	1.74492	0.122965	1.12243	6.36051	0.0360535	0.885589	6.5439	48.608	1.46588	0.894218	6.57548	58.5168	1.49147
0.5	Rendering 1	dataset09.01.2023	sieć mobilna B	MobileNet V3 Large	224		1	Gaussian noise (strength 0.05)	650	0	0	0	115	0	0	115	0	Nie	PiecewiseConstantDecay	Adam		decay_steps=100000, decay_rate=0.96,	Tak	0.168575	1.12534	11.4629	0.0528813	0.764325	5.35697	45.3447	1.1785	1.02007	7.90029	45.6532	1.91466	0.196675	1.32208	12.8402	0.0698832	0.849062	6.36907	40.5333	1.47505	0.828476	6.30951	45.806	1.53746
0.5	Rendering 1	dataset09.01.2023	sieć mobilna B	MobileNet V3 Large	224	2	1	Gaussian noise (strength 0.05)	650	0	5000	0	115	0	0	115	0	Tak	ExponentialDecay	Adam				0.447531	4.10079	22.8028	0.402194	0.757349	5.86451	36.629	1.18902	0.779096	5.89637	41.7056	1.2044	0.364841	3.41343	18.4437	0.2735	0.766461	5.94344	40.8964	1.20013	0.767179	5.85642	46.1855	1.15501
0.5	Rendering 1	dataset09.01.2023	sieć mobilna B	MobileNet V3 Large	224	2	1	Gaussian noise (strength 0.05)	650	0	2500	0	115	0	0	115	0	Tak	ExponentialDecay	Adam				0.494919	4.34042	25.5051	0.49606	0.867902	6.54824	38.9536	1.46045	0.879644	6.51917	42.5631	1.47199	0.424771	3.87833	22.4944	0.367907	0.98706	7.28166	44.0446	1.79553	0.959232	7.0994	44.2589	1.7738
0.5	Rendering 1	dataset09.01.2023	sieć mobilna B	MobileNet V3 Large	224	2	1	Gaussian noise (strength 0.05)	650	0	0	0	115	0	0	115	0	Tak	ExponentialDecay	Adam				0.669044	4.20812	43.6151	0.770717	1.11437	7.89181	47.7837	2.16894	1.09238	7.69214	47.9108	2.10584	0.501006	3.29677	34.2973	0.420443	1.12534	8.03799	48.8519	2.2341	1.06696	7.63571	47.9728	2.01486
0.5	Rendering 1	dataset09.01.2023	sieć mobilna B	MobileNet V3 Large	224	2	1	Gaussian noise (strength 0.05)	650	0	5000	0	115	0	0	115	0	Tak	ExponentialDecay	Adam				0.549692	4.92634	27.1642	0.656482	1.68706	10.223	75.9502	4.13567	1.93285	11.0186	76.4685	5.47256	0.458174	4.16403	22.6674	0.475123	1.82831	10.8715	73.7055	4.88324	1.78575	10.633	75.7046	4.70901
0.5	Rendering 1	dataset09.01.2023	sieć mobilna B	MobileNet V3 Large	224	2	1	Gaussian noise (strength 0.05)	650	0	2500	0	115	0	0	115	0	Tak	ExponentialDecay	Adam				0.63774	5.63241	31.5863	0.842828	1.01493	7.3089	71.2341	1.9261	1.07841	7.50446	90.5179	1.97899	0.544207	4.93577	26.5207	0.631854	1.01258	7.28959	53.2486	1.94178	0.990138	6.91755	65.9458	1.80598
0.5	Rendering 1	dataset09.01.2023	sieć mobilna B	MobileNet V3 Large	224	2	1	Gaussian noise (strength 0.05)	650	0	0	0	115	0	0	115	0	Tak	ExponentialDecay	Adam				0.844692	5.2233	56.9783	1.22551	1.3827	9.30481	61.3458	3.63742	1.38777	9.22685	59.8611	3.75182	0.809374	5.01637	44.8011	1.258	1.51704	10.1747	72.1143	4.09063	1.49125	10.0968	67.7982	4.0782
0.5	Rendering 1	dataset09.01.2023	sieć mobilna A	MobileNet V3 Large	224		1	Gaussian noise (strength 0.05)	650	0	5000	0	115	0	0	115	0	Tak	CosineDecay	RMSprop	1		Tak	0.635	5.673	32.193	0.825	0.908	6.976	45.765	1.836	0.96	7.242	49.868	1.911	0.631	5.672	31.448	0.816	0.864	6.459	43.684	1.66	0.871	6.573	49.93	1.707
0.5	Rendering 1	dataset09.01.2023	sieć mobilna A	MobileNet V3 Large	224		1	Gaussian noise (strength 0.05)	650	0	2500	0	115	0	0	115	0	Tak	CosineDecay	RMSprop	1		Tak	0.61	5.324	31.591	0.761	0.867	6.596	47.577	1.719	0.91	6.828	53.08	1.803	0.596	5.144	31.283	0.739	0.838	6.302	48.682	1.564	0.897	6.614	52.715	1.695
0.5	Rendering 1	dataset09.01.2023	sieć mobilna A	MobileNet V3 Large	224		1	Gaussian noise (strength 0.05)	650	0	0	0	115	0	0	115	0	Tak	CosineDecay	RMSprop	1		Tak	0.512	3.317	33.743	0.459	0.785	6.031	40.272	1.431	0.833	6.25	47.955	1.472	0.524	3.466	33.831	0.513	0.846	6.309	48.629	1.471	0.796	5.922	47.478	1.266
0.5	Rendering 1	dataset09.01.2023	sieć mobilna A	MobileNet V3 Large	224		1	Gaussian noise (strength 0.05)	650	0	5000	0	115	0	0	115	0	Tak	CosineDecay	RMSprop	1		Nie	0.253	2.315	12.971	0.131	0.723	5.747	44.211	0.94	0.677	5.369	41.241	0.854	0.253	2.335	12.9	0.132	0.682	5.27	46.278	0.91	0.689	5.365	50.636	0.921
0.5	Rendering 1	dataset09.01.2023	sieć mobilna A	MobileNet V3 Large	224		1	Gaussian noise (strength 0.05)	650	0	2500	0	115	0	0	115	0	Tak	CosineDecay	RMSprop	1		Nie	0.244	2.246	12.571	0.124	0.839	6.407	40.843	1.239	0.877	6.593	46.873	1.324	0.239	2.183	12.207	0.121	0.791	6.038	38.984	1.13	0.778	5.895	39.104	1.079
0.5	Rendering 1	dataset09.01.2023	sieć mobilna A	MobileNet V3 Large	224		1	Gaussian noise (strength 0.05)	650	0	0	0	115	0	0	115	0	Tak	CosineDecay	RMSprop	1		Nie	0.278	1.85	18.497	0.13	0.706	5.597	32.561	1.167	0.714	5.69	33.774	1.225	0.221	1.504	14.278	0.087	0.912	6.843	38.702	1.678	0.879	6.607	39.624	1.513
0.5	Rendering 1	dataset09.01.2023	sieć mobilna B	MobileNet V3 Large	224	#NAME?	1	Gaussian noise (strength 0.05)	650	0	5000	0	115	0	0	115	0	Tak	PiecewiseConstantDecay	RMSprop	1e-05	decay_steps=100000, decay_rate=0.96,	Nie	0.651894	5.65873	34.8175	0.804674	0.903757	6.89972	65.2977	1.3617	0.872673	6.64049	64.1648	1.24084	0.647176	5.6679	34.8145	0.806612	0.979946	7.32464	80.4695	1.56156	0.848662	6.43997	64.2611	1.21236
0.5	Rendering 1	dataset09.01.2023	sieć mobilna B	MobileNet V3 Large	224	#NAME?	1	Gaussian noise (strength 0.05)	650	0	2500	0	115	0	0	115	0	Tak	PiecewiseConstantDecay	RMSprop	1e-05	decay_steps=100000, decay_rate=0.96,	Nie	0.675891	5.61743	37.6732	0.84824	1.04379	7.82874	53.7717	1.8624	1.01276	7.60332	49.0652	1.91258	0.681464	5.79828	37.0521	0.876777	1.05249	7.86123	59.5266	1.78975	0.918447	6.94143	51.153	1.64902
0.5	Rendering 1	dataset09.01.2023	sieć mobilna B	MobileNet V3 Large	224	#NAME?	1	Gaussian noise (strength 0.05)	650	0	0	0	115	0	0	115	0	Tak	PiecewiseConstantDecay	RMSprop	1e-05	decay_steps=100000, decay_rate=0.96,	Nie	0.907191	5.39551	62.7149	1.29478	1.29259	9.05037	60.5437	2.63805	1.35537	9.27952	63.6558	3.0128	0.933208	5.3957	62.9629	1.37037	1.27843	9.01034	58.9973	2.86571	1.22329	8.43928	56.868	2.49116
0.5	Rendering 1	dataset09.01.2023	sieć mobilna B	MobileNet V3 Large	224	#NAME?	1	Gaussian noise (strength 0.05)	650	0	5000	0	115	0	0	115	0	Tak	PiecewiseConstantDecay	RMSprop	0.001	decay_steps=100000, decay_rate=0.96,	Nie	0.21271	2.03902	10.3799	0.0988309	0.769793	6.26624	34.2414	1.18021	0.76079	6.15204	36.5774	1.14082	0.199196	1.91266	9.73225	0.0865288	0.751015	6.08726	35.8133	1.09986	0.763318	6.0073	37.0321	1.11084
0.5	Rendering 1	dataset09.01.2023	sieć mobilna B	MobileNet V3 Large	224	#NAME?	1	Gaussian noise (strength 0.05)	650	0	2500	0	115	0	0	115	0	Tak	PiecewiseConstantDecay	RMSprop	0.001	decay_steps=100000, decay_rate=0.96,	Nie	0.248638	2.28479	12.6761	0.129055	0.826827	6.58618	37.3848	1.30144	0.823187	6.56638	39.4721	1.34957	0.231214	2.10593	11.8418	0.109425	0.827016	6.61361	40.2091	1.34389	0.819946	6.3465	39.9256	1.25506
0.5	Rendering 1	dataset09.01.2023	sieć mobilna B	MobileNet V3 Large	224	#NAME?	1	Gaussian noise (strength 0.05)	650	0	0	0	115	0	0	115	0	Tak	PiecewiseConstantDecay	RMSprop	0.001	decay_steps=100000, decay_rate=0.96,	Nie	0.288578	2.02021	18.7523	0.157277	1.19606	8.78891	49.7418	2.53553	1.09938	8.28769	43.7889	2.32588	0.289556	1.97462	18.4003	0.15406	1.1605	8.5942	47.1845	2.57001	1.08976	7.99749	46.0864	2.25919
0.5	Rendering 1	dataset09.01.2023	sieć mobilna B	MobileNet V3 Large	224		1	Gaussian noise (strength 0.05)	650	0	5000	0	115	0	0	115	0	Nie	PiecewiseConstantDecay	RMSprop		decay_steps=100000, decay_rate=0.96,	Tak	0.238989	2.17993	12.6147	0.115487	0.886676	6.24383	89.9596	1.26492	0.825415	6.27028	66.8249	1.10157	0.236795	2.15414	12.4244	0.115289	0.869869	6.32169	83.6703	1.20268	0.989956	7.0777	101.946	1.46622
0.5	Rendering 1	dataset09.01.2023	sieć mobilna B	MobileNet V3 Large	224		1	Gaussian noise (strength 0.05)	650	0	2500	0	115	0	0	115	0	Nie	PiecewiseConstantDecay	RMSprop		decay_steps=100000, decay_rate=0.96,	Tak	0.313081	2.70296	17.7163	0.195798	0.875294	6.1054	78.1503	1.26062	0.916628	6.96633	61.1443	1.41686	0.323875	2.81662	18.0935	0.204919	0.892444	6.35395	73.1836	1.2259	0.926469	6.66573	82.908	1.40609
0.5	Rendering 1	dataset09.01.2023	sieć mobilna B	MobileNet V3 Large	224		1	Gaussian noise (strength 0.05)	650	0	0	0	115	0	0	115	0	Nie	PiecewiseConstantDecay	RMSprop		decay_steps=100000, decay_rate=0.96,	Tak	0.400178	2.606	27.9338	0.270668	0.940089	6.22201	59.0314	1.62988	1.23529	9.0624	55.4512	2.76399	0.341581	2.15107	25.4239	0.193619	1.05742	7.40864	57.7094	1.9574	1.05633	7.35964	60.2907	2.04857
0.5	Rendering 1	dataset09.01.2023	sieć mobilna B	MobileNet V3 Large	224		1	Gaussian noise (strength 0.05)	650	0	5000	0	115	0	0	115	0	Nie	PiecewiseConstantDecay	RMSprop		decay_steps=100000, decay_rate=0.96,	Tak	0.0571858	0.54883	2.82819	0.00761115	0.634495	4.59573	60.3085	0.762598	0.595662	4.90437	41.0406	0.691218	0.0392576	0.372602	1.96601	0.00354259	0.626679	4.93626	51.9087	0.778974	0.658865	4.97853	62.6006	0.868015
0.5	Rendering 1	dataset09.01.2023	sieć mobilna B	MobileNet V3 Large	224		1	Gaussian noise (strength 0.05)	650	0	2500	0	115	0	0	115	0	Nie	PiecewiseConstantDecay	RMSprop		decay_steps=100000, decay_rate=0.96,	Tak	0.0671685	0.614021	3.50511	0.00963294	0.580091	4.0778	54.5102	0.657464	0.615334	5.12064	35.6893	0.737362	0.0493338	0.454806	2.55864	0.00545389	0.615123	4.74922	48.037	0.766292	0.64584	4.87442	56.0307	0.774922
0.5	Rendering 1	dataset09.01.2023	sieć mobilna B	MobileNet V3 Large	224		1	Gaussian noise (strength 0.05)	650	0	0	0	115	0	0	115	0	Nie	PiecewiseConstantDecay	RMSprop		decay_steps=100000, decay_rate=0.96,	Tak	0.110382	0.751895	7.39038	0.023665	0.716049	5.13324	40.5891	1.11386	1.14908	8.71298	48.4029	2.3534	0.102548	0.694716	6.89243	0.0192676	0.875982	6.59433	41.3214	1.48564	0.916318	6.82609	49.1289	1.68433
0.5	Rendering 1	dataset09.01.2023	sieć mobilna B	MobileNet V3 Large	224	2	1	Gaussian noise (strength 0.05)	650	0	5000	0	115	0	0	115	0	Tak	ExponentialDecay	RMSprop				0.353644	3.23155	18.3067	0.254232	0.98327	7.16019	43.8363	1.67891	0.997589	7.17102	46.5997	1.72864	0.278515	2.56541	14.4117	0.154811	1.20341	8.39935	51.5733	2.43798	1.16391	8.1827	51.1733	2.34624
0.5	Rendering 1	dataset09.01.2023	sieć mobilna B	MobileNet V3 Large	224	2	1	Gaussian noise (strength 0.05)	650	0	2500	0	115	0	0	115	0	Tak	ExponentialDecay	RMSprop				0.431354	3.90773	22.8166	0.380562	0.791003	5.97512	36.5861	1.17568	0.777605	5.81179	38.362	1.13708	0.370342	3.31929	19.6298	0.270548	1.17651	8.23512	50.6842	2.26911	1.13453	7.9818	49.7047	2.15169
0.5	Rendering 1	dataset09.01.2023	sieć mobilna B	MobileNet V3 Large	224	2	1	Gaussian noise (strength 0.05)	650	0	0	0	115	0	0	115	0	Tak	ExponentialDecay	RMSprop				0.519033	3.41704	35.218	0.473964	1.02082	7.45954	42.0577	1.98187	0.983268	7.18505	42.2662	1.83348	0.430716	2.78542	29.1768	0.301869	1.20291	8.51596	49.7688	2.50149	1.11142	7.9736	47.4525	2.21666
0.5	Rendering 1	dataset09.01.2023	sieć mobilna B	MobileNet V3 Large	224	2	1	Gaussian noise (strength 0.05)	650	0	5000	0	115	0	0	115	0	Tak	ExponentialDecay	RMSprop				1.27507	11.3565	214.587	4.4379	1.50792	9.54422	58.281	4.12275	1.49151	9.25026	57.9661	4.10874	0.740161	6.32468	34.3348	1.35265	1.22364	8.29569	64.2108	2.52157	1.17414	8.20541	66.3291	2.56182
0.5	Rendering 1	dataset09.01.2023	sieć mobilna B	MobileNet V3 Large	224	2	1	Gaussian noise (strength 0.05)	650	0	2500	0	115	0	0	115	0	Tak	ExponentialDecay	RMSprop				2.25569	14.0399	89.0793	7.73653	1.91416	11.3706	69.9355	5.7445	1.8664	11.036	69.535	5.54551	2.24681	14.0143	89.4454	7.68046	1.94717	11.5576	71.0801	5.97295	1.89028	11.249	70.2216	5.8385
0.5	Rendering 1	dataset09.01.2023	sieć mobilna B	MobileNet V3 Large	224	2	1	Gaussian noise (strength 0.05)	650	0	0	0	115	0	0	115	0	Tak	ExponentialDecay	RMSprop				0.813818	5.5482	52.2774	1.34592	0.996002	7.48497	57.183	1.82426	0.9588	7.11939	62.4533	1.78672	0.753106	5.06455	44.1129	1.09189	1.95859	11.4524	76.445	5.4231	1.89171	11.1114	74.3549	5.26113
0.5	Rendering 1	dataset09.01.2023	sieć mobilna A	MobileNet V3 Large	224		2	Gaussian noise (strength 0.1)	650	0	5000	0	115	0	0	115	0	Tak	CosineDecay	Adam	1		Tak	0.751	6.545	37.626	1.144	0.895	6.853	51.681	1.637	0.97	7.306	56.415	1.869	0.738	6.472	36.443	1.114	0.82	6.186	46.289	1.506	0.859	6.376	55.489	1.489
0.5	Rendering 1	dataset09.01.2023	sieć mobilna A	MobileNet V3 Large	224		2	Gaussian noise (strength 0.1)	650	0	2500	0	115	0	0	115	0	Tak	CosineDecay	Adam	1		Tak	0.704	6.126	35.475	0.985	0.811	6.218	52.05	1.401	0.81	6.149	55.374	1.37	0.721	6.24	36.051	1.047	0.744	5.66	50.021	1.171	0.828	6.13	58.665	1.328
0.5	Rendering 1	dataset09.01.2023	sieć mobilna A	MobileNet V3 Large	224		2	Gaussian noise (strength 0.1)	650	0	0	0	115	0	0	115	0	Tak	CosineDecay	Adam	1		Tak	0.733	4.577	45.543	0.934	0.899	6.679	52.516	1.609	0.928	6.958	52.151	1.66	0.695	4.377	42.441	0.878	0.902	6.746	51.279	1.586	0.884	6.561	52.08	1.599
0.5	Rendering 1	dataset09.01.2023	sieć mobilna A	MobileNet V3 Large	224		2	Gaussian noise (strength 0.1)	650	0	5000	0	115	0	0	115	0	Tak	CosineDecay	Adam	1		Nie	0.258	2.397	13.294	0.14	0.787	5.934	71.127	1.216	0.684	5.242	58.544	0.955	0.259	2.381	13.37	0.138	0.767	5.691	66.658	1.21	0.747	5.428	74.577	1.142
0.5	Rendering 1	dataset09.01.2023	sieć mobilna A	MobileNet V3 Large	224		2	Gaussian noise (strength 0.1)	650	0	2500	0	115	0	0	115	0	Tak	CosineDecay	Adam	1		Nie	0.256	2.307	13.535	0.132	0.676	5.32	43.737	0.899	0.699	5.441	47.941	1.071	0.25	2.25	13.203	0.128	0.666	5.223	42.759	0.886	0.638	4.901	40.732	0.826
0.5	Rendering 1	dataset09.01.2023	sieć mobilna A	MobileNet V3 Large	224		2	Gaussian noise (strength 0.1)	650	0	0	0	115	0	0	115	0	Tak	CosineDecay	Adam	1		Nie	0.225	1.504	15.142	0.092	0.936	7.066	38.619	1.863	0.958	7.234	40.001	1.902	0.228	1.557	14.765	0.096	0.947	7.091	39.155	1.83	0.915	6.877	39.123	1.698
0.5	Rendering 1	dataset09.01.2023	sieć mobilna B	MobileNet V3 Large	224	#NAME?	2	Gaussian noise (strength 0.1)	650	0	5000	0	115	0	0	115	0	Tak	PiecewiseConstantDecay	Adam	1e-05	decay_steps=100000, decay_rate=0.96,	Nie	0.788899	6.6597	40.9922	1.20657	1.48672	9.92997	60.8974	3.59874	1.37806	8.82422	61.5231	2.88544	0.795566	6.7544	41.7228	1.21544	1.38327	9.36807	59.2157	3.12805	1.47722	9.81868	61.6256	3.43847
0.5	Rendering 1	dataset09.01.2023	sieć mobilna B	MobileNet V3 Large	224	#NAME?	2	Gaussian noise (strength 0.1)	650	0	2500	0	115	0	0	115	0	Tak	PiecewiseConstantDecay	Adam	1e-05	decay_steps=100000, decay_rate=0.96,	Nie	0.855145	7.10827	45.906	1.38113	1.17215	8.48094	52.15	2.53999	1.06317	7.3572	47.7649	2.10024	0.829972	6.94185	43.8702	1.33683	1.15136	8.30063	53.3495	2.52121	1.17795	8.4067	55.3624	2.41714
0.5	Rendering 1	dataset09.01.2023	sieć mobilna B	MobileNet V3 Large	224	#NAME?	2	Gaussian noise (strength 0.1)	650	0	0	0	115	0	0	115	0	Tak	PiecewiseConstantDecay	Adam	1e-05	decay_steps=100000, decay_rate=0.96,	Nie	1.27392	7.0817	86.0224	2.65126	1.25342	8.80224	59.2854	2.82868	1.3222	9.14169	66.4734	3.05703	1.24303	6.9654	84.2854	2.46455	1.31563	9.14082	64.6962	3.0478	1.19748	8.33376	65.2819	2.61117
0.5	Rendering 1	dataset09.01.2023	sieć mobilna B	MobileNet V3 Large	224	#NAME?	2	Gaussian noise (strength 0.1)	650	0	5000	0	115	0	0	115	0	Tak	PiecewiseConstantDecay	Adam	0.001	decay_steps=100000, decay_rate=0.96,	Nie	0.26108	2.43878	13.1513	0.142642	0.960413	7.52335	48.8199	1.79074	0.901874	6.66154	47.9878	1.57853	0.236313	2.2292	11.8094	0.120618	0.958039	7.39226	51.6777	1.83053	1.066	8.03102	58.8231	2.05597
0.5	Rendering 1	dataset09.01.2023	sieć mobilna B	MobileNet V3 Large	224	#NAME?	2	Gaussian noise (strength 0.1)	650	0	2500	0	115	0	0	115	0	Tak	PiecewiseConstantDecay	Adam	0.001	decay_steps=100000, decay_rate=0.96,	Nie	0.323239	2.91535	16.8012	0.215049	0.725692	5.62757	51.115	0.942076	0.657769	4.8164	51.0267	0.796802	0.325492	2.96808	16.77	0.223878	0.708986	5.42265	55.5201	0.892941	0.821671	6.14849	65.8807	1.15742
0.5	Rendering 1	dataset09.01.2023	sieć mobilna B	MobileNet V3 Large	224	#NAME?	2	Gaussian noise (strength 0.1)	650	0	0	0	115	0	0	115	0	Tak	PiecewiseConstantDecay	Adam	0.001	decay_steps=100000, decay_rate=0.96,	Nie	0.41489	2.73096	27.3881	0.300844	0.935882	7.12665	45.8124	1.71079	0.850665	6.65428	41.8887	1.49363	0.411243	2.73439	27.1149	0.274812	0.980008	7.3852	48.3739	1.88231	0.881891	6.75185	43.2522	1.55874
0.5	Rendering 1	dataset09.01.2023	sieć mobilna B	MobileNet V3 Large	224		2	Gaussian noise (strength 0.1)	650	0	5000	0	115	0	0	115	0	Nie	PiecewiseConstantDecay	Adam		decay_steps=100000, decay_rate=0.96,	Tak	0.379612	3.48565	19.4282	0.312319	0.792874	5.46581	65.0277	1.25953	0.868171	6.72345	45.7539	1.43282	0.363307	3.35251	18.3787	0.285943	0.811112	5.9893	51.6492	1.22747	0.847152	6.18507	61.9278	1.29282
0.5	Rendering 1	dataset09.01.2023	sieć mobilna B	MobileNet V3 Large	224		2	Gaussian noise (strength 0.1)	650	0	2500	0	115	0	0	115	0	Nie	PiecewiseConstantDecay	Adam		decay_steps=100000, decay_rate=0.96,	Tak	0.46181	4.05275	24.4671	0.436192	0.816897	5.51618	54.8322	1.25208	0.956482	7.34432	45.9421	1.77735	0.474932	4.18984	25.4368	0.471216	0.890419	6.45099	47.9253	1.57637	0.889231	6.59324	57.2028	1.57087
0.5	Rendering 1	dataset09.01.2023	sieć mobilna B	MobileNet V3 Large	224		2	Gaussian noise (strength 0.1)	650	0	0	0	115	0	0	115	0	Nie	PiecewiseConstantDecay	Adam		decay_steps=100000, decay_rate=0.96,	Tak	0.497636	3.11789	35.0311	0.433807	0.8967	5.87979	59.9574	1.51493	1.24602	8.92769	63.9873	2.56907	0.521611	3.25489	35.084	0.479801	0.988254	6.85235	57.0774	1.7858	1.01465	7.15472	66.2933	1.88356
0.5	Rendering 1	dataset09.01.2023	sieć mobilna B	MobileNet V3 Large	224		2	Gaussian noise (strength 0.1)	650	0	5000	0	115	0	0	115	0	Nie	PiecewiseConstantDecay	Adam		decay_steps=100000, decay_rate=0.96,	Tak	0.147222	1.41162	7.3163	0.0502934	0.694663	4.94698	49.5208	1.00525	0.891157	7.15717	41.672	1.51498	0.126723	1.21046	6.3025	0.0384344	0.803566	6.08155	48.3751	1.26284	0.771223	5.99086	49.1871	1.30578
0.5	Rendering 1	dataset09.01.2023	sieć mobilna B	MobileNet V3 Large	224		2	Gaussian noise (strength 0.1)	650	0	2500	0	115	0	0	115	0	Nie	PiecewiseConstantDecay	Adam		decay_steps=100000, decay_rate=0.96,	Tak	0.158932	1.46252	8.24744	0.057242	0.694683	4.96318	47.2781	0.981677	0.896263	7.07525	42.2829	1.50619	0.139451	1.28897	7.16414	0.0442444	0.812215	6.08641	44.6102	1.25098	0.829916	6.20975	52.9433	1.25759
0.5	Rendering 1	dataset09.01.2023	sieć mobilna B	MobileNet V3 Large	224		2	Gaussian noise (strength 0.1)	650	0	0	0	115	0	0	115	0	Nie	PiecewiseConstantDecay	Adam		decay_steps=100000, decay_rate=0.96,	Tak	0.173664	1.16047	11.6471	0.0525077	0.714734	5.10918	36.5381	1.09794	1.06192	8.18679	43.8931	2.10672	0.168405	1.14298	11.2449	0.0539252	0.851205	6.42147	37.8517	1.43347	0.852267	6.52455	39.237	1.65126
0.5	Rendering 1	dataset09.01.2023	sieć mobilna B	MobileNet V3 Large	224	2	2	Gaussian noise (strength 0.1)	650	0	5000	0	115	0	0	115	0	Tak	ExponentialDecay	Adam				0.417651	3.83027	21.4014	0.354515	0.872908	6.56352	40.0747	1.42634	0.830934	6.21185	42.1069	1.26558	0.337471	3.12708	17.0464	0.240821	0.747953	5.82857	42.8881	1.0993	0.712651	5.49802	46.0881	0.980487
0.5	Rendering 1	dataset09.01.2023	sieć mobilna B	MobileNet V3 Large	224	2	2	Gaussian noise (strength 0.1)	650	0	2500	0	115	0	0	115	0	Tak	ExponentialDecay	Adam				0.483927	4.31361	25.226	0.493314	0.849659	6.42395	37.6445	1.44805	0.88221	6.49578	45.0002	1.42056	0.390993	3.48163	19.9657	0.312853	0.908685	6.79712	42.6542	1.51232	0.870795	6.56305	43.413	1.44087
0.5	Rendering 1	dataset09.01.2023	sieć mobilna B	MobileNet V3 Large	224	2	2	Gaussian noise (strength 0.1)	650	0	0	0	115	0	0	115	0	Tak	ExponentialDecay	Adam				0.604329	3.97955	42.1427	0.628058	1.02626	7.41738	43.8614	1.95206	1.03772	7.42016	47.288	1.9981	0.493875	3.27333	32.9813	0.449076	1.08691	7.81247	47.7259	2.02335	1.02984	7.45841	45.7672	1.98249
0.5	Rendering 1	dataset09.01.2023	sieć mobilna B	MobileNet V3 Large	224	2	2	Gaussian noise (strength 0.1)	650	0	5000	0	115	0	0	115	0	Tak	ExponentialDecay	Adam				0.398741	3.70363	19.3932	0.395308	1.43927	9.22324	63.7881	3.2286	1.43083	9.09202	63.8254	3.27287	0.320543	2.95774	16.153	0.242039	1.50478	9.67892	69.3661	3.44299	1.44921	9.32572	67.5447	3.26703
0.5	Rendering 1	dataset09.01.2023	sieć mobilna B	MobileNet V3 Large	224	2	2	Gaussian noise (strength 0.1)	650	0	2500	0	115	0	0	115	0	Tak	ExponentialDecay	Adam				0.742401	6.36735	36.6651	1.12627	1.45572	9.43718	74.4977	3.49862	1.52516	9.55154	86.1253	3.63719	0.546985	4.9234	26.8794	0.647303	1.61033	10.0933	71.7383	4.22772	1.68075	10.3028	84.1769	4.64028
0.5	Rendering 1	dataset09.01.2023	sieć mobilna B	MobileNet V3 Large	224	2	2	Gaussian noise (strength 0.1)	650	0	0	0	115	0	0	115	0	Tak	ExponentialDecay	Adam				0.523184	3.50687	32.674	0.545999	0.824877	6.30941	39.9777	1.43338	0.851682	6.41787	44.4429	1.5088	0.508464	3.18818	29.5543	0.490993	0.695857	5.51379	41.6319	0.928321	0.737892	5.57635	51.94	1.05819
0.5	Rendering 1	dataset09.01.2023	sieć mobilna A	MobileNet V3 Large	224		2	Gaussian noise (strength 0.1)	650	0	5000	0	115	0	0	115	0	Tak	CosineDecay	RMSprop	1		Tak	0.698	6.251	34.596	0.996	0.926	7.066	54.664	1.677	0.929	7.038	56.742	1.719	0.679	6.02	33.621	0.958	0.852	6.355	49.232	1.476	0.87	6.562	59.054	1.506
0.5	Rendering 1	dataset09.01.2023	sieć mobilna A	MobileNet V3 Large	224		2	Gaussian noise (strength 0.1)	650	0	2500	0	115	0	0	115	0	Tak	CosineDecay	RMSprop	1		Tak	0.657	5.624	34.056	0.885	0.774	6.053	44.977	1.325	0.794	6.118	50.404	1.385	0.656	5.681	33.608	0.899	0.736	5.684	46.578	1.249	0.761	5.832	46.414	1.214
0.5	Rendering 1	dataset09.01.2023	sieć mobilna A	MobileNet V3 Large	224		2	Gaussian noise (strength 0.1)	650	0	0	0	115	0	0	115	0	Tak	CosineDecay	RMSprop	1		Tak	0.539	3.49	33.632	0.535	0.815	6.208	44.729	1.427	0.866	6.526	48.135	1.552	0.535	3.536	33.671	0.538	0.89	6.658	49.866	1.52	0.812	6.073	48.058	1.295
0.5	Rendering 1	dataset09.01.2023	sieć mobilna A	MobileNet V3 Large	224		2	Gaussian noise (strength 0.1)	650	0	5000	0	115	0	0	115	0	Tak	CosineDecay	RMSprop	1		Nie	0.25	2.322	12.677	0.13	0.829	6.433	46.356	1.162	0.757	5.919	39.388	1.01	0.256	2.372	12.941	0.137	0.759	5.684	46.515	1.03	0.782	5.943	49.479	1.083
0.5	Rendering 1	dataset09.01.2023	sieć mobilna A	MobileNet V3 Large	224		2	Gaussian noise (strength 0.1)	650	0	2500	0	115	0	0	115	0	Tak	CosineDecay	RMSprop	1		Nie	0.245	2.228	12.764	0.125	0.791	5.994	41.422	1.053	0.829	6.26	47.117	1.252	0.25	2.288	12.821	0.135	0.727	5.567	37.154	0.94	0.738	5.569	40.026	0.967
0.5	Rendering 1	dataset09.01.2023	sieć mobilna A	MobileNet V3 Large	224		2	Gaussian noise (strength 0.1)	650	0	0	0	115	0	0	115	0	Tak	CosineDecay	RMSprop	1		Nie	0.265	1.756	17.685	0.126	0.835	6.394	35.87	1.423	0.852	6.507	37.911	1.452	0.221	1.512	14.469	0.089	0.875	6.644	37.111	1.551	0.862	6.475	38.381	1.478
0.5	Rendering 1	dataset09.01.2023	sieć mobilna B	MobileNet V3 Large	224	#NAME?	2	Gaussian noise (strength 0.1)	650	0	5000	0	115	0	0	115	0	Tak	PiecewiseConstantDecay	RMSprop	1e-05	decay_steps=100000, decay_rate=0.96,	Nie	0.687199	6.00944	36.4976	0.909297	0.916146	7.08987	66.3854	1.41452	0.743649	5.49907	55.7942	0.943723	0.666203	5.81838	35.1274	0.870824	0.879149	6.68625	71.0178	1.20641	0.88114	6.63103	70.8652	1.25399
0.5	Rendering 1	dataset09.01.2023	sieć mobilna B	MobileNet V3 Large	224	#NAME?	2	Gaussian noise (strength 0.1)	650	0	2500	0	115	0	0	115	0	Tak	PiecewiseConstantDecay	RMSprop	1e-05	decay_steps=100000, decay_rate=0.96,	Nie	0.74413	6.17158	41.0307	1.06147	1.12622	8.23593	52.3994	2.34899	1.06669	8.02729	47.6876	2.17665	0.717292	5.99968	39.176	1.00224	1.10949	8.18686	54.7674	2.18488	0.970935	7.24914	46.5531	1.80631
0.5	Rendering 1	dataset09.01.2023	sieć mobilna B	MobileNet V3 Large	224	#NAME?	2	Gaussian noise (strength 0.1)	650	0	0	0	115	0	0	115	0	Tak	PiecewiseConstantDecay	RMSprop	1e-05	decay_steps=100000, decay_rate=0.96,	Nie	0.949617	5.54176	63.9791	1.50177	1.52517	10.0919	61.2648	4.0603	1.42385	9.67555	58.9049	3.55375	0.944313	5.59338	64.0345	1.47768	1.47965	9.83185	61.4467	3.83865	1.40227	9.20659	59.992	3.58474
0.5	Rendering 1	dataset09.01.2023	sieć mobilna B	MobileNet V3 Large	224	#NAME?	2	Gaussian noise (strength 0.1)	650	0	5000	0	115	0	0	115	0	Tak	PiecewiseConstantDecay	RMSprop	0.001	decay_steps=100000, decay_rate=0.96,	Nie	0.23074	2.19049	11.3287	0.115528	0.813956	6.45789	48.134	1.2473	0.669613	5.15229	35.3178	0.849482	0.215312	2.05999	10.4903	0.100601	0.759672	6.0376	40.6616	1.00936	0.826545	6.37424	48.5226	1.12973
0.5	Rendering 1	dataset09.01.2023	sieć mobilna B	MobileNet V3 Large	224	#NAME?	2	Gaussian noise (strength 0.1)	650	0	2500	0	115	0	0	115	0	Tak	PiecewiseConstantDecay	RMSprop	0.001	decay_steps=100000, decay_rate=0.96,	Nie	0.238059	2.16437	12.316	0.12168	0.858224	6.74808	40.3459	1.41555	0.872745	6.7922	40.5634	1.47314	0.21953	1.98617	11.3776	0.103113	0.869796	6.7849	45.0045	1.43664	0.823732	6.32103	42.3137	1.25292
0.5	Rendering 1	dataset09.01.2023	sieć mobilna B	MobileNet V3 Large	224	#NAME?	2	Gaussian noise (strength 0.1)	650	0	0	0	115	0	0	115	0	Tak	PiecewiseConstantDecay	RMSprop	0.001	decay_steps=100000, decay_rate=0.96,	Nie	0.31928	2.18527	20.7257	0.181474	0.978542	7.57531	43.3643	1.83805	0.925305	7.23636	39.9515	1.77274	0.289864	1.93453	18.9512	0.156003	0.980493	7.47525	45.6559	1.8253	0.889239	6.83955	40.7461	1.6226
0.5	Rendering 1	dataset09.01.2023	sieć mobilna B	MobileNet V3 Large	224		2	Gaussian noise (strength 0.1)	650	0	5000	0	115	0	0	115	0	Nie	PiecewiseConstantDecay	RMSprop		decay_steps=100000, decay_rate=0.96,	Tak	0.297194	2.7223	15.5066	0.192522	0.819059	5.69935	84.583	1.12991	0.833419	6.49211	57.4747	1.10281	0.308382	2.81361	16.1178	0.205396	0.794446	5.91969	64.6007	1.03118	0.916176	6.59025	89.4656	1.30603
0.5	Rendering 1	dataset09.01.2023	sieć mobilna B	MobileNet V3 Large	224		2	Gaussian noise (strength 0.1)	650	0	2500	0	115	0	0	115	0	Nie	PiecewiseConstantDecay	RMSprop		decay_steps=100000, decay_rate=0.96,	Tak	0.400098	3.54531	22.0255	0.330961	0.842186	5.8065	75.5341	1.25154	0.897865	7.04231	52.1239	1.40219	0.3909	3.45244	21.3214	0.312303	0.891534	6.43824	65.548	1.42956	0.953693	6.90409	78.8277	1.46423
0.5	Rendering 1	dataset09.01.2023	sieć mobilna B	MobileNet V3 Large	224		2	Gaussian noise (strength 0.1)	650	0	0	0	115	0	0	115	0	Nie	PiecewiseConstantDecay	RMSprop		decay_steps=100000, decay_rate=0.96,	Tak	0.480918	2.9987	34.3423	0.390313	0.940713	6.31139	78.7658	1.68347	1.19107	8.71763	67.3722	2.56446	0.477871	2.97565	36.5851	0.375932	0.999013	6.94557	60.07	1.75985	1.03468	7.2168	78.517	1.86876
0.5	Rendering 1	dataset09.01.2023	sieć mobilna B	MobileNet V3 Large	224		2	Gaussian noise (strength 0.1)	650	0	5000	0	115	0	0	115	0	Nie	PiecewiseConstantDecay	RMSprop		decay_steps=100000, decay_rate=0.96,	Tak	0.0683282	0.643977	3.47931	0.0107307	0.651915	4.57912	76.7857	0.890276	0.543073	4.36364	40.2841	0.554586	0.0507837	0.475261	2.59739	0.00609438	0.58283	4.41028	53.5935	0.704678	0.668746	4.94408	70.6704	0.899526
0.5	Rendering 1	dataset09.01.2023	sieć mobilna B	MobileNet V3 Large	224		2	Gaussian noise (strength 0.1)	650	0	2500	0	115	0	0	115	0	Nie	PiecewiseConstantDecay	RMSprop		decay_steps=100000, decay_rate=0.96,	Tak	0.0823977	0.755214	4.26392	0.0162251	0.588318	4.32994	50.7371	0.740312	0.624241	5.2049	36.4661	0.75448	0.0650858	0.601479	3.34205	0.0108873	0.603461	4.78546	46.0869	0.804712	0.646946	5.04178	55.1844	0.871955
0.5	Rendering 1	dataset09.01.2023	sieć mobilna B	MobileNet V3 Large	224		2	Gaussian noise (strength 0.1)	650	0	0	0	115	0	0	115	0	Nie	PiecewiseConstantDecay	RMSprop		decay_steps=100000, decay_rate=0.96,	Tak	0.139607	0.927387	9.48966	0.0346074	0.694503	5.02853	36.1841	1.07415	1.06844	8.27646	43.4384	2.14257	0.127834	0.853853	8.77881	0.0286019	0.81514	6.19064	37.5901	1.36341	0.813741	6.32456	38.8423	1.50755
0.5	Rendering 1	dataset09.01.2023	sieć mobilna B	MobileNet V3 Large	224	2	2	Gaussian noise (strength 0.1)	650	0	5000	0	115	0	0	115	0	Tak	ExponentialDecay	RMSprop				0.353788	3.27559	18.1468	0.258458	0.871078	6.47976	43.0443	1.36584	0.874953	6.38468	46.3118	1.32593	0.291691	2.70989	14.7719	0.176913	0.840637	6.39777	45.2294	1.27874	0.783419	5.85217	46.4098	1.1254
0.5	Rendering 1	dataset09.01.2023	sieć mobilna B	MobileNet V3 Large	224	2	2	Gaussian noise (strength 0.1)	650	0	2500	0	115	0	0	115	0	Tak	ExponentialDecay	RMSprop				0.500319	4.57536	25.4205	0.517969	0.870028	6.46139	39.691	1.36413	0.898339	6.58123	44.5965	1.42937	0.331402	3.02771	17.313	0.21817	1.13624	7.9219	52.4942	2.05029	1.10057	7.69511	52.6265	1.97606
0.5	Rendering 1	dataset09.01.2023	sieć mobilna B	MobileNet V3 Large	224	2	2	Gaussian noise (strength 0.1)	650	0	0	0	115	0	0	115	0	Tak	ExponentialDecay	RMSprop				0.539201	3.43666	36.8118	0.495638	1.34907	9.06086	55.4606	2.97578	1.31764	8.81994	54.8337	2.87118	0.470613	3.13275	30.497	0.397103	1.31843	9.03981	53.6733	2.91477	1.2318	8.57748	51.0859	2.59497
0.5	Rendering 1	dataset09.01.2023	sieć mobilna B	MobileNet V3 Large	224	2	2	Gaussian noise (strength 0.1)	650	0	5000	0	115	0	0	115	0	Tak	ExponentialDecay	RMSprop				2.41387	15.3404	90.7435	8.68386	1.95863	11.4994	71.03	5.94314	1.90995	11.1622	70.4951	5.739	2.40703	15.321	91.0241	8.63698	1.97251	11.6298	71.7582	6.08426	1.91302	11.3138	70.5866	5.94507
0.5	Rendering 1	dataset09.01.2023	sieć mobilna B	MobileNet V3 Large	224	2	2	Gaussian noise (strength 0.1)	650	0	2500	0	115	0	0	115	0	Tak	ExponentialDecay	RMSprop				2.29269	14.4451	89.7594	7.88659	1.90366	11.3394	69.6807	5.69803	1.85611	11.0056	69.313	5.50027	2.29847	14.462	89.5918	7.92282	1.90925	11.4469	70.1219	5.80647	1.85695	11.1517	69.8438	5.67923
0.5	Rendering 1	dataset09.01.2023	sieć mobilna B	MobileNet V3 Large	224	2	2	Gaussian noise (strength 0.1)	650	0	0	0	115	0	0	115	0	Tak	ExponentialDecay	RMSprop				1.20861	8.14122	72.7844	3.07995	1.54483	10.0392	61.7944	4.02962	1.47711	9.70565	60.5078	3.80701	1.15251	6.30872	55.4819	2.3434	0.904754	6.84778	41.0408	1.91601	0.878008	6.65682	43.3962	1.73089
0.5	Rendering 1	dataset09.01.2023	sieć mobilna B	MobileNet V3 Large	224	2	3	hue	650	0	5000	0	115	0	0	115	0	Tak	CosineDecay	Adam	1e-05			0.62993	5.45427	33.6321	0.764022	1.09865	8.12532	58.161	2.24364	0.921656	6.50378	55.8008	1.58919	0.614185	5.31937	32.6912	0.735854	1.02951	7.77365	56.7691	2.15619	0.911624	6.5574	50.201	1.72862
0.5	Rendering 1	dataset09.01.2023	sieć mobilna B	MobileNet V3 Large	224	2	3	hue	650	0	2500	0	115	0	0	115	0	Tak	CosineDecay	Adam	1e-05			0.802331	6.5232	42.8584	1.17119	1.39575	9.54299	60.5603	3.32562	1.19131	7.78035	58.4984	2.44747	0.814967	6.70347	44.1026	1.23427	1.28936	9.01853	59.0038	3.18169	1.20063	7.92296	56.0656	2.67323
0.5	Rendering 1	dataset09.01.2023	sieć mobilna B	MobileNet V3 Large	224	2	3	hue	650	0	0	0	115	0	0	115	0	Tak	CosineDecay	Adam	1e-05			0.907305	5.49826	61.3538	1.38578	1.58253	10.5589	67.1552	3.92548	1.4369	9.65966	65.8992	3.56325	0.930789	5.54936	63.8046	1.40625	1.46616	9.92965	60.2043	3.67319	1.40739	9.27353	63.0794	3.40569
0.5	Rendering 1	dataset09.01.2023	sieć mobilna B	MobileNet V3 Large	224	2	3	hue	650	0	5000	0	115	0	0	115	0	Tak	CosineDecay	Adam	0.001
0.5	Rendering 1	dataset09.01.2023	sieć mobilna B	MobileNet V3 Large	224	2	3	hue	650	0	2500	0	115	0	0	115	0	Tak	CosineDecay	Adam	0.001			0.360535	3.23329	18.8031	0.263573	0.999044	7.43012	63.3537	1.7227	0.98922	7.79732	54.7892	1.7858	0.29961	2.72699	15.4505	0.182542	0.870511	6.50849	47.0658	1.4456	1.05129	8.24929	47.3164	1.90997
0.5	Rendering 1	dataset09.01.2023	sieć mobilna B	MobileNet V3 Large	224	2	3	hue	650	0	0	0	115	0	0	115	0	Tak	CosineDecay	Adam	0.001			0.367192	2.41282	24.1544	0.240402	0.851787	6.60675	42.726	1.36393	0.962102	7.71248	41.9127	1.83675	0.39965	2.66702	26.4338	0.279002	0.786785	6.09389	37.9899	1.3654	0.927988	7.48895	43.5095	1.7276
0.5	Rendering 1	dataset09.01.2023	sieć mobilna B	MobileNet V3 Large	224	2	3	hue	650	0	5000	0	115	0	0	115	0	Tak	PiecewiseConstantDecay	Adam		decay_steps=100000, decay_rate=0.96,	Tak	0.793122	6.7112	42.0548	1.1792	1.35909	9.69806	61.603	3.05847	1.22872	8.52418	60.169	2.6599	0.776205	6.60421	40.5543	1.14359	1.14046	7.6691	61.8066	2.19552	1.25393	8.91151	59.7723	2.71219
0.5	Rendering 1	dataset09.01.2023	sieć mobilna B	MobileNet V3 Large	224	2	3	hue	650	0	2500	0	115	0	0	115	0	Tak	PiecewiseConstantDecay	Adam		decay_steps=100000, decay_rate=0.96,	Tak	0.83757	6.76473	45.0922	1.30125	1.23776	8.99249	57.8122	2.73185	1.17009	8.17731	58.8697	2.45387	0.84012	6.80678	45.5812	1.28598	1.03062	7.02748	58.113	1.86673	1.21081	8.73426	60.2909	2.60342
0.5	Rendering 1	dataset09.01.2023	sieć mobilna B	MobileNet V3 Large	224	2	3	hue	650	0	0	0	115	0	0	115	0	Tak	PiecewiseConstantDecay	Adam		decay_steps=100000, decay_rate=0.96,	Tak	1.07261	6.12557	72.1207	1.83458	1.1026	8.2269	80.0389	2.09483	0.986329	7.10236	73.1138	1.63582	1.02612	6.05557	71.9305	1.75321	0.878764	5.98532	75.2597	1.29261	1.05123	7.66687	78.4759	1.77822
0.5	Rendering 1	dataset09.01.2023	sieć mobilna B	MobileNet V3 Large	224	2	3	hue	650	0	5000	0	115	0	0	115	0	Tak	PiecewiseConstantDecay	Adam		decay_steps=100000, decay_rate=0.96,	Nie	0.250598	2.32771	12.8021	0.131045	0.951779	7.40035	57.9058	1.57048	0.866596	6.48938	57.7105	1.34585	0.231886	2.16116	11.7334	0.112253	0.81317	5.83745	57.1844	1.16028	0.904396	6.98171	56.9412	1.49259
0.5	Rendering 1	dataset09.01.2023	sieć mobilna B	MobileNet V3 Large	224	2	3	hue	650	0	2500	0	115	0	0	115	0	Tak	PiecewiseConstantDecay	Adam		decay_steps=100000, decay_rate=0.96,	Nie	0.295038	2.63937	15.6374	0.179238	0.90384	7.04844	68.6366	1.41851	0.801147	6.03153	62.7864	1.17857	0.286635	2.58184	14.8893	0.171704	0.822086	5.87617	70.4649	1.16565	0.88567	6.77277	69.1161	1.40216
0.5	Rendering 1	dataset09.01.2023	sieć mobilna B	MobileNet V3 Large	224	2	3	hue	650	0	0	0	115	0	0	115	0	Tak	PiecewiseConstantDecay	Adam		decay_steps=100000, decay_rate=0.96,	Nie	0.386107	2.53698	26.0135	0.26502	0.91514	7.00262	42.6853	1.64849	0.812846	5.84402	41.3177	1.33283	0.40862	2.72417	26.7828	0.291459	0.960137	7.34233	42.6959	1.79324	0.922494	7.00371	40.3392	1.71625
0.5	Rendering 1	dataset09.01.2023	sieć mobilna B	MobileNet V3 Large	224	2	3	hue	650	0	5000	0	115	0	0	115	0	Nie	PiecewiseConstantDecay	Adam		decay_steps=100000, decay_rate=0.96,	Tak	0.107	1	5.556	0.025	0.853	6.363	54.839	1.323	0.958	7.455	54.328	1.675	0.066	0.62	3.373	0.01	0.878	6.54	54.436	1.395	0.805	5.432	75.014	1.067
0.5	Rendering 1	dataset09.01.2023	sieć mobilna B	MobileNet V3 Large	224	2	3	hue	650	0	2500	0	115	0	0	115	0	Nie	PiecewiseConstantDecay	Adam		decay_steps=100000, decay_rate=0.96,	Tak	0.121	1.073	6.611	0.031	0.832	6.337	46.673	1.403	0.916	7.168	50.113	1.671	0.106	0.957	5.652	0.023	0.77	5.856	43.482	1.203	0.66	4.639	50.968	0.855
0.5	Rendering 1	dataset09.01.2023	sieć mobilna B	MobileNet V3 Large	224	2	3	hue	650	0	0	0	115	0	0	115	0	Nie	PiecewiseConstantDecay	Adam		decay_steps=100000, decay_rate=0.96,	Tak	0.161	1.045	10.694	0.043	0.901	6.624	44.962	1.549	1.018	7.689	46.677	1.95	0.133	0.903	8.943	0.032	0.961	6.943	47.711	1.61	0.738	5.121	42.419	1.06
0.5	Rendering 1	dataset09.01.2023	sieć mobilna B	MobileNet V3 Large	224	2	3	hue	650	0	5000	0	115	0	0	115	0	Nie	PiecewiseConstantDecay	Adam		decay_steps=100000, decay_rate=0.96,	Nie	0.221	1.98	12.04	0.098	0.866	6.495	75.36	1.299	0.963	7.431	75.411	1.507	0.209	1.875	11.435	0.089	0.831	6.192	67.825	1.107	0.855	5.906	82.708	1.128
0.5	Rendering 1	dataset09.01.2023	sieć mobilna B	MobileNet V3 Large	224	2	3	hue	650	0	2500	0	115	0	0	115	0	Nie	PiecewiseConstantDecay	Adam		decay_steps=100000, decay_rate=0.96,	Nie	0.261	2.289	14.528	0.131	0.94	6.801	78.219	1.503	0.914	7.034	65.551	1.553	0.252	2.217	13.779	0.126	0.787	5.811	62.241	1.071	0.877	5.951	85.246	1.306
0.5	Rendering 1	dataset09.01.2023	sieć mobilna B	MobileNet V3 Large	224	2	3	hue	650	0	0	0	115	0	0	115	0	Nie	PiecewiseConstantDecay	Adam		decay_steps=100000, decay_rate=0.96,	Nie	0.306	1.938	22.136	0.159	1.1	7.645	72.187	2.05	1.189	8.712	64.046	2.603	0.339	2.12	24.646	0.187	0.99	6.948	56.273	1.679	0.937	6.187	72.598	1.5
0.5	Rendering 1	dataset09.01.2023	sieć mobilna B	MobileNet V3 Large	224	2	3	hue	650	0	5000	0	115	0	0	115	0	Tak	CosineDecay	RMSprop	1e-05			0.57391	5.07733	30.7804	0.627066	0.966078	6.95263	94.9285	1.31968	0.87832	6.05523	87.9348	1.1558	0.547108	4.80865	29.8527	0.559209	0.984262	7.12794	99.9603	1.41291	0.905162	6.34652	85.24	1.14736
0.5	Rendering 1	dataset09.01.2023	sieć mobilna B	MobileNet V3 Large	224	2	3	hue	650	0	2500	0	115	0	0	115	0	Tak	CosineDecay	RMSprop	1e-05			0.707951	5.84876	39.6959	0.94905	0.891462	6.74359	63.301	1.35513	0.803881	5.79026	65.1974	1.16292	0.713813	5.90176	39.5339	0.957899	0.974208	7.34411	75.2908	1.66798	0.815057	5.92469	61.3515	1.32229
0.5	Rendering 1	dataset09.01.2023	sieć mobilna B	MobileNet V3 Large	224	2	3	hue	650	0	0	0	115	0	0	115	0	Tak	CosineDecay	RMSprop	1e-05			0.757619	4.73071	53.2561	0.988938	1.41491	9.80712	60.3545	3.16768	1.23546	8.90101	54.3481	2.90741	0.775154	4.85598	56.0835	0.972808	1.35109	9.55152	58.3742	3.09324	1.25443	8.78347	56.3187	2.72144
0.5	Rendering 1	dataset09.01.2023	sieć mobilna B	MobileNet V3 Large	224	2	3	hue	650	0	5000	0	115	0	0	115	0	Tak	CosineDecay	RMSprop	0.001			0.201841	1.91487	9.9208	0.0887038	1.16493	8.35385	52.1101	2.14605	1.04046	7.03989	50.619	1.73378	0.188214	1.79137	9.21097	0.0787966	1.1256	8.18441	53.0613	2.18934	0.970573	6.72205	48.131	1.60029
0.5	Rendering 1	dataset09.01.2023	sieć mobilna B	MobileNet V3 Large	224	2	3	hue	650	0	2500	0	115	0	0	115	0	Tak	CosineDecay	RMSprop	0.001			0.245802	2.29302	12.4258	0.125984	1.0748	7.94002	45.8693	1.99968	0.939493	6.57377	45.1223	1.51861	0.222019	2.06858	11.1464	0.108482	1.0699	7.96555	48.1696	2.11417	0.90227	6.45029	43.3499	1.50828
0.5	Rendering 1	dataset09.01.2023	sieć mobilna B	MobileNet V3 Large	224	2	3	hue	650	0	0	0	115	0	0	115	0	Tak	CosineDecay	RMSprop	0.001			0.256698	1.75135	16.765	0.115581	1.19129	8.96301	45.0846	2.56276	1.03445	8.09055	39.5958	2.43684	0.26397	1.80083	16.8756	0.142486	1.15591	8.72672	45.9416	2.5379	1.05267	7.91578	40.6982	2.28905
0.5	Rendering 1	dataset09.01.2023	sieć mobilna B	MobileNet V3 Large	224	2	3	hue	650	0	5000	0	115	0	0	115	0	Tak	PiecewiseConstantDecay	RMSprop		decay_steps=100000, decay_rate=0.96,	Tak	0.587996	5.12839	31.335	0.667551	0.939814	7.19875	77.9138	1.36747	0.878756	6.6342	70.281	1.37328	0.567606	4.98801	30.1766	0.626784	0.917446	6.77365	84.1055	1.30628	0.871884	6.68614	72.818	1.33779
0.5	Rendering 1	dataset09.01.2023	sieć mobilna B	MobileNet V3 Large	224	2	3	hue	650	0	2500	0	115	0	0	115	0	Tak	PiecewiseConstantDecay	RMSprop		decay_steps=100000, decay_rate=0.96,	Tak	0.686348	5.64112	39.1748	0.875427	0.983628	7.41582	59.4403	1.70443	0.914439	6.64328	57.467	1.49037	0.683569	5.5762	39.0658	0.86575	0.982015	7.4948	62.1276	1.85517	1.07408	7.87635	72.6412	1.9551
0.5	Rendering 1	dataset09.01.2023	sieć mobilna B	MobileNet V3 Large	224	2	3	hue	650	0	0	0	115	0	0	115	0	Tak	PiecewiseConstantDecay	RMSprop		decay_steps=100000, decay_rate=0.96,	Tak	0.834236	5.04773	65.4319	1.14032	1.34892	9.05188	57.647	2.9414	1.5297	10.5697	67.9193	3.88572	0.832297	4.9967	58.2026	1.10915	1.3777	9.43357	55.2841	3.18782	1.25214	8.29822	63.3162	2.68913
0.5	Rendering 1	dataset09.01.2023	sieć mobilna B	MobileNet V3 Large	224	2	3	hue	650	0	5000	0	115	0	0	115	0	Tak	PiecewiseConstantDecay	RMSprop		decay_steps=100000, decay_rate=0.96,	Nie	0.185327	1.76506	9.1069	0.0786603	1.20902	8.48134	52.8583	2.19809	1.31839	9.73758	53.9629	2.79883	0.171172	1.61885	8.45836	0.0666809	1.25805	9.00412	52.9181	2.42983	1.14984	7.88027	52.1633	2.05294
0.5	Rendering 1	dataset09.01.2023	sieć mobilna B	MobileNet V3 Large	224	2	3	hue	650	0	2500	0	115	0	0	115	0	Tak	PiecewiseConstantDecay	RMSprop		decay_steps=100000, decay_rate=0.96,	Nie	0.243262	2.24002	12.3275	0.123659	0.878347	6.85124	38.0819	1.49965	0.990169	8.12898	39.7469	2.00002	0.225059	2.07902	11.4014	0.106834	0.880832	7.03759	38.4351	1.48195	0.77284	5.95969	38.1203	1.17216
0.5	Rendering 1	dataset09.01.2023	sieć mobilna B	MobileNet V3 Large	224	2	3	hue	650	0	0	0	115	0	0	115	0	Tak	PiecewiseConstantDecay	RMSprop		decay_steps=100000, decay_rate=0.96,	Nie	0.265646	1.77934	17.371	0.122767	1.06869	8.38481	41.8	2.42507	0.958312	7.30034	40.6368	1.97688	0.240937	1.64288	15.9053	0.103968	0.84418	6.21735	40.1204	1.44398	1.01592	7.91513	40.487	2.25775
0.5	Rendering 1	dataset09.01.2023	sieć mobilna B	MobileNet V3 Large	224	2	3	hue	650	0	5000	0	115	0	0	115	0	Nie	PiecewiseConstantDecay	RMSprop		decay_steps=100000, decay_rate=0.96,	Tak	0.05	0.473	2.504	0.005	0.512	3.767	46.396	0.519	0.556	4.342	44.549	0.552	0.036	0.338	1.837	0.003	0.498	3.7	44.781	0.504	0.586	3.939	64.608	0.672
0.5	Rendering 1	dataset09.01.2023	sieć mobilna B	MobileNet V3 Large	224	2	3	hue	650	0	2500	0	115	0	0	115	0	Nie	PiecewiseConstantDecay	RMSprop		decay_steps=100000, decay_rate=0.96,	Tak	0.057	0.518	3.055	0.007	0.529	4.181	37.473	0.59	0.619	5.194	37.312	0.787	0.04	0.366	2.084	0.003	0.516	4.111	35.026	0.567	0.517	3.713	45.641	0.519
0.5	Rendering 1	dataset09.01.2023	sieć mobilna B	MobileNet V3 Large	224	2	3	hue	650	0	0	0	115	0	0	115	0	Nie	PiecewiseConstantDecay	RMSprop		decay_steps=100000, decay_rate=0.96,	Tak	0.119	0.784	8.328	0.023	0.904	6.934	38.929	1.829	1.031	8.058	42.868	2.203	0.075	0.511	5.088	0.011	0.931	7.026	40.441	1.757	0.732	5.303	39.271	1.202
0.5	Rendering 1	dataset09.01.2023	sieć mobilna B	MobileNet V3 Large	224	2	3	hue	650	0	5000	0	115	0	0	115	0	Nie	PiecewiseConstantDecay	RMSprop		decay_steps=100000, decay_rate=0.96,	Nie	0.281	2.479	15.587	0.155	0.92	6.763	60.76	1.603	1.046	8.027	66.983	2.023	0.266	2.346	14.718	0.137	0.927	6.821	53.258	1.687	0.843	5.797	69.955	1.325
0.5	Rendering 1	dataset09.01.2023	sieć mobilna B	MobileNet V3 Large	224	2	3	hue	650	0	2500	0	115	0	0	115	0	Nie	PiecewiseConstantDecay	RMSprop		decay_steps=100000, decay_rate=0.96,	Nie	0.342	2.99	18.806	0.238	1.075	7.653	77.641	1.843	1.147	8.596	74.102	2.34	0.316	2.767	17.72	0.194	0.991	7.048	67.495	1.672	0.89	5.954	82.05	1.254
0.5	Rendering 1	dataset09.01.2023	sieć mobilna B	MobileNet V3 Large	224	2	3	hue	650	0	0	0	115	0	0	115	0	Nie	PiecewiseConstantDecay	RMSprop		decay_steps=100000, decay_rate=0.96,	Nie	0.325	2.022	24.504	0.181	1.158	7.856	64.689	2.366	1.251	8.754	65.132	2.644	0.325	2.024	23.213	0.174	1.194	7.824	68.932	2.355	0.995	6.168	77.055	1.626
0.5	Rendering 1	dataset09.01.2023	sieć mobilna B	MobileNet V3 Large	224	#NAME?	0	None	650	0	0	0	115	0	0	115	0	Tak	PiecewiseConstantDecay	RMSprop	0.001	decay_steps=100000, decay_rate=0.96,	Nie	0.0605405	0.519314	3.34804	0.0074929	0.541337	4.11627	40.6185	0.53749	0.544868	3.84651	48.7143	0.529552	0.0392808	0.333101	2.20963	0.00308478	0.627254	4.88565	49.4947	0.720993	0.522375	3.86529	44.1373	0.547863
0.5	Rendering 1	dataset09.01.2023	sieć mobilna B	MobileNet V3 Large	224	3		Rotation	650	0	5000	0	115	0	0	115	0	Nie	PiecewiseConstantDecay	Adam	1e-05			0.495276	4.37348	25.3006	0.502134	0.885543	6.12567	55.6118	1.51451	0.976354	7.16494	53.6552	1.8208	0.49384	4.3693	25.2564	0.510624	0.888584	6.37761	56.6401	1.51467	0.927609	6.69159	58.0915	1.55749
0.5	Rendering 1	dataset09.01.2023	sieć mobilna B	MobileNet V3 Large	224	3		Rotation	650	0	2500	0	115	0	0	115	0	Nie	PiecewiseConstantDecay	Adam	1e-05			0.610341	5.19891	31.3148	0.765708	0.930697	6.37034	63.8433	1.47309	1.05247	7.56054	63.0333	1.93528	0.581074	4.98873	29.5643	0.711437	0.915596	6.50736	52.6774	1.57672	1.0121	7.17407	65.3624	1.74455
0.5	Rendering 1	dataset09.01.2023	sieć mobilna B	MobileNet V3 Large	224	3		Rotation	650	0	0	0	115	0	0	115	0	Nie	PiecewiseConstantDecay	Adam	1e-05			0.719494	4.44701	46.8158	0.967093	1.13228	7.35256	83.8287	2.24209	1.19897	8.14664	79.8246	2.44173	0.697639	4.28052	47.3174	0.903669	1.15921	7.9306	81.1714	2.22809	1.13185	7.38617	83.7589	2.18322
0.5	Rendering 1	dataset09.01.2023	sieć mobilna B	MobileNet V3 Large	224	3		Rotation	650	0	5000	0	115	0	0	115	0	Nie	PiecewiseConstantDecay	Adam	0.001			0.211914	1.95835	10.7405	0.103915	0.844338	6.05729	73.9715	1.28301	0.889869	6.75296	62.4908	1.3969	0.180507	1.69125	9.01224	0.0819738	0.769509	5.7647	52.4075	1.08541	0.844572	6.15627	62.5824	1.29775
0.5	Rendering 1	dataset09.01.2023	sieć mobilna B	MobileNet V3 Large	224	3		Rotation	650	0	2500	0	115	0	0	115	0	Nie	PiecewiseConstantDecay	Adam	0.001			0.281896	2.55394	14.219	0.183804	0.687675	4.80696	60.1948	0.965045	0.840071	6.40698	70.56	1.46385	0.243586	2.22114	12.2789	0.139267	0.716838	5.33771	50.0135	0.939235	0.813518	6.13902	65.5942	1.33241
0.5	Rendering 1	dataset09.01.2023	sieć mobilna B	MobileNet V3 Large	224	3		Rotation	650	0	0	0	115	0	0	115	0	Nie	PiecewiseConstantDecay	Adam	0.001			0.384917	2.6191	23.352	0.330583	0.844019	5.90965	46.6121	1.24478	0.993916	7.20775	48.0501	1.63885	0.343094	2.36326	21.3666	0.240563	0.890614	6.44927	46.3286	1.52399	0.937493	6.69337	48.6276	1.58896
0.5	Rendering 1	dataset09.01.2023	sieć mobilna B	MobileNet V3 Large	224	3		Rotation	650	0	5000	0	115	0	0	115	0	Nie	PiecewiseConstantDecay	RMSprop	1e-05			0.427755	3.87055	21.9266	0.401821	1.12291	8.18882	135.183	1.96152	1.11059	8.56029	125.037	2.04065	0.44329	4.03099	22.3249	0.417376	1.07238	7.89566	118.676	1.77103	1.08042	8.03723	128.212	1.85513
0.5	Rendering 1	dataset09.01.2023	sieć mobilna B	MobileNet V3 Large	224	3		Rotation	650	0	2500	0	115	0	0	115	0	Nie	PiecewiseConstantDecay	RMSprop	1e-05			0.517004	4.49666	27.53	0.565735	0.964866	6.88265	97.304	1.33962	1.01361	7.6894	93.688	1.59096	0.536611	4.69179	27.7279	0.603038	0.980369	7.22324	99.1841	1.43292	0.99789	7.3054	101.178	1.49018
0.5	Rendering 1	dataset09.01.2023	sieć mobilna B	MobileNet V3 Large	224	3		Rotation	650	0	0	0	115	0	0	115	0	Nie	PiecewiseConstantDecay	RMSprop	1e-05			0.656455	4.13082	43.8212	0.782695	1.0339	6.98724	74.6438	1.70805	1.11614	8.02515	65.8158	2.21927	0.674131	4.26871	43.9833	0.803905	1.06833	7.39323	66.4861	2.02943	1.19049	7.96516	81.3255	2.23341
0.5	Rendering 1	dataset09.01.2023	sieć mobilna B	MobileNet V3 Large	224	3		Rotation	650	0	5000	0	115	0	0	115	0	Nie	PiecewiseConstantDecay	RMSprop	0.001			0.149632	1.40514	7.47411	0.0577933	0.517885	4.09936	51.2051	0.81754	0.558407	4.60446	47.3927	0.837943	0.132634	1.24293	6.73145	0.0457274	0.510511	4.2723	43.3105	0.746919	0.521978	4.25096	47.8561	0.783026
0.5	Rendering 1	dataset09.01.2023	sieć mobilna B	MobileNet V3 Large	224	3		Rotation	650	0	2500	0	115	0	0	115	0	Nie	PiecewiseConstantDecay	RMSprop	0.001			0.169253	1.55075	8.74381	0.0713179	0.613906	4.63829	67.0461	1.09197	0.578114	4.9374	49.8043	0.954971	0.148839	1.36069	7.70054	0.0573734	0.56093	4.71115	46.1966	0.911867	0.601909	4.90342	54.9484	0.959219
0.5	Rendering 1	dataset09.01.2023	sieć mobilna B	MobileNet V3 Large	224	3		Rotation	650	0	0	0	115	0	0	115	0	Nie	PiecewiseConstantDecay	RMSprop	0.001			0.240242	1.61724	15.5358	0.109986	0.653157	4.66332	34.004	0.820329	0.806098	6.10781	37.5185	1.25671	0.207093	1.41136	13.8074	0.084753	0.656611	5.05981	31.9285	1.03451	0.667977	5.10345	33.8455	0.969407
0.5	Rendering 1	dataset09.01.2023	sieć mobilna B	MobileNet V3 Large	224	2		Rotation 90° x	650	0	5000	0	115	0	0	115	0	Nie	PiecewiseConstantDecay	Adam	1e-05			0.339736	3.03988	18.0564	0.236371	0.824372	6.05959	58.3889	1.2476	0.912081	6.91177	57.8845	1.51434	0.311963	2.79529	16.7748	0.203136	0.872126	6.33396	64.0426	1.35681	0.916133	6.68968	66.1023	1.47716
0.5	Rendering 1	dataset09.01.2023	sieć mobilna B	MobileNet V3 Large	224	2		Rotation 90° x	650	0	2500	0	115	0	0	115	0	Nie	PiecewiseConstantDecay	Adam	1e-05			0.242949	2.05865	14.1257	0.11226	0.845477	5.87738	64.0655	1.23952	0.924129	7.09746	53.8789	1.60205	0.178943	1.56511	9.9763	0.0622331	0.882887	6.41145	59.2825	1.37969	0.803946	5.89292	51.911	1.24279
0.5	Rendering 1	dataset09.01.2023	sieć mobilna B	MobileNet V3 Large	224	2		Rotation 90° x	650	0	0	0	115	0	0	115	0	Nie	PiecewiseConstantDecay	Adam	1e-05			0.239802	1.5078	18.3518	0.0926095	0.757945	5.33976	48.8591	1.10205	1.00045	7.41646	47.4722	2.00851	0.196792	1.22824	14.4279	0.0635308	0.944699	6.84163	51.1594	1.6637	0.933883	6.74236	50.7375	1.70962
0.5	Rendering 1	dataset09.01.2023	sieć mobilna B	MobileNet V3 Large	224	2		Rotation 90° x	650	0	5000	0	115	0	0	115	0	Nie	PiecewiseConstantDecay	Adam	0.001			0.124708	1.13736	6.69431	0.0323254	0.844314	6.01749	57.3103	1.40236	0.891178	6.8407	49.5819	1.52591	0.100188	0.910715	5.32993	0.0203502	0.768485	5.74246	52.454	1.07337	0.788547	5.74969	58.1502	1.0567
0.5	Rendering 1	dataset09.01.2023	sieć mobilna B	MobileNet V3 Large	224	2		Rotation 90° x	650	0	2500	0	115	0	0	115	0	Nie	PiecewiseConstantDecay	Adam	0.001			0.157467	1.40778	8.42568	0.049757	1.0257	6.84972	80.6196	1.70487	1.10599	7.94941	66.7018	2.1312	0.114546	1.02354	6.25808	0.0267094	1.04735	7.40751	61.6862	2.14821	1.07702	7.46275	70.3201	1.94032
0.5	Rendering 1	dataset09.01.2023	sieć mobilna B	MobileNet V3 Large	224	2		Rotation 90° x	650	0	0	0	115	0	0	115	0	Nie	PiecewiseConstantDecay	Adam	0.001			0.189218	1.24427	12.8304	0.0643188	0.725763	5.32042	39.1471	1.02847	0.798692	6.28487	36.9661	1.30955	0.129536	0.851301	8.8904	0.0265917	0.741851	5.70442	38.7636	1.15789	0.740089	5.63088	39.82	1.03928
0.5	Rendering 1	dataset09.01.2023	sieć mobilna B	MobileNet V3 Large	224	2		Rotation 90° x	650	0	5000	0	115	0	0	115	0	Nie	PiecewiseConstantDecay	RMSprop	1e-05			0.23752	2.13598	12.8829	0.115234	0.875277	6.47373	76.0624	1.17489	0.881528	6.54569	71.9787	1.25002	0.236085	2.13216	12.7107	0.117479	0.835788	6.05671	72.9958	1.10849	0.845115	5.88307	80.378	1.1154
0.5	Rendering 1	dataset09.01.2023	sieć mobilna B	MobileNet V3 Large	224	2		Rotation 90° x	650	0	2500	0	115	0	0	115	0	Nie	PiecewiseConstantDecay	RMSprop	1e-05			0.324488	2.83309	18.261	0.216747	0.822598	5.96906	75.3393	1.01458	0.790793	5.46538	82.0818	0.98718	0.31286	2.73902	17.6466	0.204719	0.879334	6.4545	88.2853	1.14076	0.779139	5.29459	87.4899	0.897737
0.5	Rendering 1	dataset09.01.2023	sieć mobilna B	MobileNet V3 Large	224	2		Rotation 90° x	650	0	0	0	115	0	0	115	0	Nie	PiecewiseConstantDecay	RMSprop	1e-05			0.285918	1.85026	20.3901	0.146097	0.990271	7.26615	63.0861	1.64913	0.874419	6.1913	61.9258	1.43146	0.294085	1.90649	20.5295	0.148139	0.899733	6.72077	60.4119	1.54882	0.895585	6.35373	59.2762	1.66087
0.5	Rendering 1	dataset09.01.2023	sieć mobilna B	MobileNet V3 Large	224	2		Rotation 90° x	650	0	5000	0	115	0	0	115	0	Nie	PiecewiseConstantDecay	RMSprop	0.001			0.0808087	0.735179	4.42905	0.0171682	0.582098	4.24851	55.8543	0.648575	0.509483	3.85992	49.8112	0.539432	0.0642478	0.595296	3.32262	0.00982917	0.651544	4.87532	80.903	0.931445	0.601794	4.43755	55.1135	0.670959
0.5	Rendering 1	dataset09.01.2023	sieć mobilna B	MobileNet V3 Large	224	2		Rotation 90° x	650	0	2500	0	115	0	0	115	0	Nie	PiecewiseConstantDecay	RMSprop	0.001			0.079837	0.736409	4.15892	0.0129921	0.621588	4.4924	61.3199	0.773732	0.546057	4.2653	42.5811	0.554295	0.0616502	0.560286	3.25527	0.00799565	0.658043	5.01949	54.5562	0.746181	0.724233	5.32418	69.472	0.95472
0.5	Rendering 1	dataset09.01.2023	sieć mobilna B	MobileNet V3 Large	224	2		Rotation 90° x	650	0	0	0	115	0	0	115	0	Nie	PiecewiseConstantDecay	RMSprop	0.001			0.145052	0.963705	9.9282	0.0366904	0.72791	5.27944	39.4577	1.03129	0.913099	6.97339	42.4835	1.59272	0.0982263	0.673553	6.46617	0.0171266	0.821061	6.15709	41.8031	1.33791	0.807502	6.0065	42.4886	1.27404
0.5	Rendering 1	dataset09.01.2023	sieć mobilna B	MobileNet V3 Large	224	1		Flip	650	0	5000	0	115	0	0	115	0	Nie	PiecewiseConstantDecay	Adam	1e-05			0.398049	3.66016	20.149	0.341849	0.98424	7.17192	66.2185	1.60486	0.977001	7.02251	58.3739	1.59175	0.375269	3.44189	19.071	0.299558	0.861694	6.19161	55.0136	1.26712	0.902003	6.22471	67.3265	1.3156
0.5	Rendering 1	dataset09.01.2023	sieć mobilna B	MobileNet V3 Large	224	1		Flip	650	0	2500	0	115	0	0	115	0	Nie	PiecewiseConstantDecay	Adam	1e-05			1.05496	8.25931	51.6485	2.08853	2.03901	11.9166	73.6071	6.48861	1.85572	10.2762	73.5467	5.33567	1.06084	8.36205	51.5082	2.13483	1.91656	11.423	71.709	6.08001	1.80639	10.1204	71.6489	5.17084
0.5	Rendering 1	dataset09.01.2023	sieć mobilna B	MobileNet V3 Large	224	1		Flip	650	0	0	0	115	0	0	115	0	Nie	PiecewiseConstantDecay	Adam	1e-05			0.442727	2.85898	30.3514	0.337362	1.09396	7.63858	63.6924	1.96416	0.953977	6.0912	60.5804	1.69354	0.448258	2.91106	30.2276	0.345323	1.04724	7.53107	62.0044	1.9949	0.967168	6.42393	63.679	1.67612
0.5	Rendering 1	dataset09.01.2023	sieć mobilna B	MobileNet V3 Large	224	1		Flip	650	0	5000	0	115	0	0	115	0	Nie	PiecewiseConstantDecay	Adam	0.001			0.11608	1.05887	6.20517	0.0278249	0.913559	6.94185	53.9992	1.68263	0.907988	6.93039	49.2262	1.57989	0.0873667	0.814523	4.54993	0.0163736	0.875965	6.48955	53.8449	1.50117	0.818271	5.96154	59.4254	1.24152
0.5	Rendering 1	dataset09.01.2023	sieć mobilna B	MobileNet V3 Large	224	1		Flip	650	0	2500	0	115	0	0	115	0	Nie	PiecewiseConstantDecay	Adam	0.001			0.436049	3.87516	21.961	0.408797	1.63256	10.5259	65.18	4.0333	1.46692	8.98135	63.1394	3.24277	0.368832	3.29449	18.6431	0.297616	1.48346	9.86794	59.5688	3.67286	1.41778	8.83626	60.9803	3.16111
0.5	Rendering 1	dataset09.01.2023	sieć mobilna B	MobileNet V3 Large	224	1		Flip	650	0	0	0	115	0	0	115	0	Nie	PiecewiseConstantDecay	Adam	0.001			0.191686	1.26755	13.6737	0.065857	0.753026	5.93385	39.9821	1.13142	0.633041	4.71313	38.1047	0.795211	0.170649	1.16198	11.6456	0.0539711	0.728384	5.78748	43.5269	1.15517	0.613472	4.74904	34.5178	0.897047
0.5	Rendering 1	dataset09.01.2023	sieć mobilna B	MobileNet V3 Large	224	1		Flip	650	0	5000	0	115	0	0	115	0	Nie	PiecewiseConstantDecay	RMSprop	1e-05			0.314334	2.90301	16.0709	0.211272	0.975724	7.2313	78.7374	1.55075	0.908235	6.7917	69.3492	1.35079	0.303317	2.81624	15.4996	0.197388	0.873411	6.45077	69.4358	1.29708	0.894874	6.2481	83.8875	1.29268
0.5	Rendering 1	dataset09.01.2023	sieć mobilna B	MobileNet V3 Large	224	1		Flip	650	0	2500	0	115	0	0	115	0	Nie	PiecewiseConstantDecay	RMSprop	1e-05			0.323989	2.90078	17.5244	0.210416	0.869805	6.2328	90.3695	1.20851	0.812845	5.74978	79.3168	1.06479	0.309136	2.71894	16.8486	0.193139	0.965023	6.97078	108.448	1.39165	0.823976	5.88946	90.7637	1.13254
0.5	Rendering 1	dataset09.01.2023	sieć mobilna B	MobileNet V3 Large	224	1		Flip	650	0	0	0	115	0	0	115	0	Nie	PiecewiseConstantDecay	RMSprop	1e-05			0.372181	2.46526	25.5894	0.25775	1.11751	7.98164	58.6528	2.31479	1.01028	6.89182	58.319	1.89887	0.361992	2.33741	24.9422	0.237077	1.14438	8.07587	58.507	2.43404	1.05862	6.95149	61.1783	2.02477
0.5	Rendering 1	dataset09.01.2023	sieć mobilna B	MobileNet V3 Large	224	1		Flip	650	0	5000	0	115	0	0	115	0	Nie	PiecewiseConstantDecay	RMSprop	0.001			0.079216	0.74048	4.02647	0.0135542	0.470478	3.91791	27.5074	0.460654	0.526111	4.33216	31.2504	0.593579	0.0665682	0.624955	3.38227	0.00975155	0.490076	3.96602	31.1191	0.479289	0.460956	3.67993	29.0485	0.465041
0.5	Rendering 1	dataset09.01.2023	sieć mobilna B	MobileNet V3 Large	224	1		Flip	650	0	2500	0	115	0	0	115	0	Nie	PiecewiseConstantDecay	RMSprop	0.001			0.0848753	0.785321	4.33468	0.0166125	0.559804	4.27737	43.5286	0.562617	0.507911	3.49093	48.9286	0.496255	0.0681727	0.628739	3.51139	0.0106423	0.621434	4.67488	52.4359	0.605057	0.544472	3.88605	48.0847	0.534553
0.5	Rendering 1	dataset09.01.2023	sieć mobilna B	MobileNet V3 Large	224	1		Flip	650	0	0	0	115	0	0	115	0	Nie	PiecewiseConstantDecay	RMSprop	0.001			0.101446	0.704869	6.85855	0.0207921	0.70218	5.62573	36.5821	1.00747	0.580088	4.43423	32.8017	0.753234	0.0752918	0.507568	5.11077	0.0104419	0.650509	5.33812	35.2915	0.945198	0.566276	4.4469	32.2131	0.738807
0.5	Rendering 1	dataset09.01.2023	sieć mobilna B	MobileNet V3 Large	224	4		Flip, rotation	650	0	5000	0	115	0	0	115	0	Nie	PiecewiseConstantDecay	Adam	1e-05			0.478928	4.28062	24.0904	0.493537	0.913874	6.47411	65.5985	1.37494	0.992959	7.42973	62.5422	1.71783	0.45085	4.04105	23.2359	0.427975	0.904504	6.64456	64.471	1.43203	0.97393	7.09081	63.5411	1.67367
0.5	Rendering 1	dataset09.01.2023	sieć mobilna B	MobileNet V3 Large	224	4		Flip, rotation	650	0	2500	0	115	0	0	115	0	Nie	PiecewiseConstantDecay	Adam	1e-05			0.618062	5.22019	31.9617	0.781792	1.03248	7.08111	68.298	1.94781	1.0674	7.84835	62.5276	2.19741	0.621009	5.29667	31.7261	0.806462	1.04523	7.37771	63.6395	2.05029	1.00285	7.14673	67.0644	1.94198
0.5	Rendering 1	dataset09.01.2023	sieć mobilna B	MobileNet V3 Large	224	4		Flip, rotation	650	0	0	0	115	0	0	115	0	Nie	PiecewiseConstantDecay	Adam	1e-05			0.706128	4.44389	46.3619	0.926427	1.00616	6.70956	63.8478	1.67052	1.05531	7.67436	58.1755	2.05628	0.633624	4.00203	40.6799	0.737086	1.1208	7.6578	72.6233	2.26256	1.11522	7.45402	72.7086	2.36088
0.5	Rendering 1	dataset09.01.2023	sieć mobilna B	MobileNet V3 Large	224	4		Flip, rotation	650	0	5000	0	115	0	0	115	0	Nie	PiecewiseConstantDecay	Adam	0.001			0.220162	2.05556	10.9536	0.113191	0.724227	5.1281	56.3762	0.985096	0.854623	6.56308	54.4118	1.45934	0.19132	1.79658	9.42635	0.0928989	0.732666	5.43246	47.6807	1.05693	0.733853	5.42216	47.4973	1.08744
0.5	Rendering 1	dataset09.01.2023	sieć mobilna B	MobileNet V3 Large	224	4		Flip, rotation	650	0	2500	0	115	0	0	115	0	Nie	PiecewiseConstantDecay	Adam	0.001			0.291598	2.64732	14.5509	0.200648	0.708925	5.21345	54.0864	0.881886	0.739411	5.75078	49.5965	0.975459	0.26208	2.34574	13.5339	0.159776	0.654157	4.98941	45.1625	0.741604	0.741991	5.52371	54.2066	0.930678
0.5	Rendering 1	dataset09.01.2023	sieć mobilna B	MobileNet V3 Large	224	4		Flip, rotation	650	0	0	0	115	0	0	115	0	Nie	PiecewiseConstantDecay	Adam	0.001			0.358287	2.45381	21.4985	0.283871	0.886315	6.14334	44.9248	1.41382	1.00156	7.33811	43.6497	1.88748	0.422351	2.88041	24.9622	0.424298	0.928752	6.63895	41.2582	1.74859	0.964707	6.87686	44.9308	1.71366
0.5	Rendering 1	dataset09.01.2023	sieć mobilna B	MobileNet V3 Large	224	4		Flip, rotation	650	0	5000	0	115	0	0	115	0	Nie	PiecewiseConstantDecay	RMSprop	1e-05			0.419363	3.79386	21.6132	0.380548	1.13317	8.5042	129.225	2.01848	1.18337	9.12593	136.009	2.24587	0.434449	3.91317	22.7013	0.410991	1.20791	9.16415	137.253	2.13086	1.16271	8.5746	142.636	2.09444
0.5	Rendering 1	dataset09.01.2023	sieć mobilna B	MobileNet V3 Large	224	4		Flip, rotation	650	0	2500	0	115	0	0	115	0	Nie	PiecewiseConstantDecay	RMSprop	1e-05			0.515846	4.47632	26.9757	0.56677	0.993075	6.92119	105.39	1.55558	0.994147	7.52942	100.534	1.65637	0.497645	4.31802	26.2645	0.530226	0.941613	6.80753	94.2889	1.45958	0.942435	6.83336	101.261	1.47913
0.5	Rendering 1	dataset09.01.2023	sieć mobilna B	MobileNet V3 Large	224	4		Flip, rotation	650	0	0	0	115	0	0	115	0	Nie	PiecewiseConstantDecay	RMSprop	1e-05			0.663479	4.2526	42.9531	0.771649	1.03961	7.16865	89.7325	1.85507	1.16717	8.29699	84.1639	2.301	0.65084	4.16137	43.8396	0.753469	1.10098	7.81625	91.8109	2.00704	1.11926	7.68196	90.3919	2.12025
0.5	Rendering 1	dataset09.01.2023	sieć mobilna B	MobileNet V3 Large	224	4		Flip, rotation	650	0	5000	0	115	0	0	115	0	Nie	PiecewiseConstantDecay	RMSprop	0.001			0.149241	1.39654	7.51758	0.0554054	0.560254	4.21694	59.5439	0.856841	0.551717	4.44044	48.0699	0.855866	0.127229	1.19694	6.38944	0.0418695	0.576398	4.74755	49.2855	0.898323	0.571612	4.50415	56.1201	0.837833
0.5	Rendering 1	dataset09.01.2023	sieć mobilna B	MobileNet V3 Large	224	4		Flip, rotation	650	0	2500	0	115	0	0	115	0	Nie	PiecewiseConstantDecay	RMSprop	0.001			0.23294	1.60811	15.0968	0.115143	0.705459	5.0548	39.518	0.895274	0.835909	6.35138	39.5039	1.3123	0.201624	1.35341	13.3206	0.0773774	0.695048	5.30182	35.9695	1.06026	0.729798	5.45968	40.4743	1.08245
0.5	Rendering 1	dataset09.01.2023	sieć mobilna B	MobileNet V3 Large	224	4		Flip, rotation	650	0	0	0	115	0	0	115	0	Nie	PiecewiseConstantDecay	RMSprop	0.001			0.159064	1.46547	8.19514	0.0610204	0.562346	4.22177	49.0496	0.729073	0.548853	4.29138	43.327	0.683246	0.146874	1.33377	7.59804	0.0546528	0.578663	4.65561	46.3431	0.749943	0.651615	5.05416	58.6376	0.920641
0.5	Rendering 1	dataset09.01.2023	sieć mobilna A	MobileNet V3 Large	224		3	Poisson noise (strength 0.05)	650	0	5000	0	115	0	0	115	0	Tak	CosineDecay	Adam	1		Tak	0.727	6.403	35.495	1.098	0.978	7.41	54.22	1.902	0.957	7.164	52.796	1.957	0.736	6.462	36.431	1.101	0.91	6.725	49.231	1.697	0.964	7.181	55.602	1.939
0.5	Rendering 1	dataset09.01.2023	sieć mobilna A	MobileNet V3 Large	224		3	Poisson noise (strength 0.05)	650	0	2500	0	115	0	0	115	0	Tak	CosineDecay	Adam	1		Tak	0.678	5.891	34.15	0.95	0.828	6.341	48.838	1.42	0.828	6.312	49.678	1.41	0.699	6.031	35.017	1.021	0.755	5.748	46.51	1.238	0.795	6.008	49.673	1.304
0.5	Rendering 1	dataset09.01.2023	sieć mobilna A	MobileNet V3 Large	224		3	Poisson noise (strength 0.05)	650	0	0	0	115	0	0	115	0	Tak	CosineDecay	Adam	1		Tak	0.605	3.875	38.01	0.676	0.819	6.265	47.536	1.441	0.859	6.533	49.391	1.544	0.59	3.776	37.211	0.647	0.827	6.252	47.943	1.391	0.846	6.323	51.82	1.372
0.5	Rendering 1	dataset09.01.2023	sieć mobilna A	MobileNet V3 Large	224		3	Poisson noise (strength 0.05)	650	0	5000	0	115	0	0	115	0	Tak	CosineDecay	Adam	1		Nie	0.277	2.55	14.321	0.155	0.615	4.801	40.457	0.696	0.587	4.576	39.866	0.687	0.275	2.545	14.177	0.154	0.597	4.513	43.245	0.736	0.606	4.573	45.045	0.775
0.5	Rendering 1	dataset09.01.2023	sieć mobilna A	MobileNet V3 Large	224		3	Poisson noise (strength 0.05)	650	0	2500	0	115	0	0	115	0	Tak	CosineDecay	Adam	1		Nie	0.253	2.317	13.285	0.131	0.619	4.912	38.075	0.772	0.613	4.819	41.748	0.79	0.248	2.267	12.985	0.127	0.607	4.743	38.889	0.702	0.589	4.545	38.736	0.651
0.5	Rendering 1	dataset09.01.2023	sieć mobilna A	MobileNet V3 Large	224		3	Poisson noise (strength 0.05)	650	0	0	0	115	0	0	115	0	Tak	CosineDecay	Adam	1		Nie	0.247	1.648	16.38	0.109	0.983	7.299	41.315	1.868	1.003	7.45	41.776	1.934	0.222	1.547	14.247	0.092	0.974	7.225	40.439	1.869	0.947	6.957	41.814	1.677
0.5	Rendering 1	dataset09.01.2023	sieć mobilna B	MobileNet V3 Large	224	#NAME?	3	Poisson noise (strength 0.05)	650	0	5000	0	115	0	0	115	0	Tak	PiecewiseConstantDecay	Adam	1e-05	decay_steps=100000, decay_rate=0.96,	Nie	0.709828	6.13898	37.2478	0.981195	1.07337	8.09794	52.6364	2.19883	0.957576	6.97059	46.9743	1.74599	0.696918	6.02431	36.6235	0.929901	0.977651	7.41944	51.1675	1.90531	1.05683	7.86899	57.6886	1.98987
0.5	Rendering 1	dataset09.01.2023	sieć mobilna B	MobileNet V3 Large	224	#NAME?	3	Poisson noise (strength 0.05)	650	0	2500	0	115	0	0	115	0	Tak	PiecewiseConstantDecay	Adam	1e-05	decay_steps=100000, decay_rate=0.96,	Nie	0.878358	7.09853	47.7513	1.43698	1.20895	8.78436	50.6156	2.68441	1.16852	7.96555	53.806	2.4372	0.872042	7.13086	47.9855	1.41766	1.25253	8.84397	56.6029	3.03784	1.29292	9.16571	58.8294	2.90983
0.5	Rendering 1	dataset09.01.2023	sieć mobilna B	MobileNet V3 Large	224	#NAME?	3	Poisson noise (strength 0.05)	650	0	0	0	115	0	0	115	0	Tak	PiecewiseConstantDecay	Adam	1e-05	decay_steps=100000, decay_rate=0.96,	Nie	1.00496	5.8952	68.8859	1.61961	1.53366	9.78741	68.924	3.68175	1.41825	9.17189	64.8909	3.33577	0.95055	5.59095	61.347	1.49734	1.58301	10.4507	66.9092	4.15556	1.50372	9.97818	62.0384	3.72187
0.5	Rendering 1	dataset09.01.2023	sieć mobilna B	MobileNet V3 Large	224	#NAME?	3	Poisson noise (strength 0.05)	650	0	5000	0	115	0	0	115	0	Tak	PiecewiseConstantDecay	Adam	0.001	decay_steps=100000, decay_rate=0.96,	Nie	0.258749	2.38973	13.2463	0.13814	0.799702	6.11807	54.6577	1.11484	0.810751	5.9687	57.0862	1.14293	0.23622	2.21338	11.9964	0.11799	0.837594	6.35393	60.0987	1.22816	0.935553	7.0333	67.3751	1.41854
0.5	Rendering 1	dataset09.01.2023	sieć mobilna B	MobileNet V3 Large	224	#NAME?	3	Poisson noise (strength 0.05)	650	0	2500	0	115	0	0	115	0	Tak	PiecewiseConstantDecay	Adam	0.001	decay_steps=100000, decay_rate=0.96,	Nie	0.363552	3.30752	18.7942	0.27125	0.896327	6.92398	54.3	1.48135	0.844836	6.16884	54.5831	1.3433	0.332235	3.01985	17.1835	0.228459	0.875659	6.74778	55.2889	1.55144	0.928399	7.02078	61.7877	1.52635
0.5	Rendering 1	dataset09.01.2023	sieć mobilna B	MobileNet V3 Large	224	#NAME?	3	Poisson noise (strength 0.05)	650	0	0	0	115	0	0	115	0	Tak	PiecewiseConstantDecay	Adam	0.001	decay_steps=100000, decay_rate=0.96,	Nie	0.431783	2.84343	28.3755	0.327518	0.782586	6.11632	38.3913	1.24323	0.778322	5.96572	40.7159	1.16665	0.435852	2.87833	28.3878	0.337759	0.845356	6.61261	43.7336	1.41889	0.793058	6.40721	37.9953	1.22054
0.5	Rendering 1	dataset09.01.2023	sieć mobilna B	MobileNet V3 Large	224		3	Poisson noise (strength 0.05)	650	0	5000	0	115	0	0	115	0	Nie	PiecewiseConstantDecay	Adam		decay_steps=100000, decay_rate=0.96,	Tak	0.349919	3.15563	18.6592	0.246473	0.784057	5.37402	57.7624	1.1966	0.983521	7.46794	55.2537	1.68438	0.340036	3.05618	18.0356	0.242035	0.892929	6.49546	53.842	1.5494	0.880773	6.46042	61.8443	1.40679
0.5	Rendering 1	dataset09.01.2023	sieć mobilna B	MobileNet V3 Large	224		3	Poisson noise (strength 0.05)	650	0	2500	0	115	0	0	115	0	Nie	PiecewiseConstantDecay	Adam		decay_steps=100000, decay_rate=0.96,	Tak	0.407573	3.54734	22.4465	0.346152	0.831024	5.72633	60.4907	1.40899	0.924384	7.07255	50.2702	1.6455	0.395825	3.39892	22.0577	0.315836	0.940135	6.79926	60.2953	1.52524	0.921441	6.66806	59.7868	1.51988
0.5	Rendering 1	dataset09.01.2023	sieć mobilna B	MobileNet V3 Large	224		3	Poisson noise (strength 0.05)	650	0	0	0	115	0	0	115	0	Nie	PiecewiseConstantDecay	Adam		decay_steps=100000, decay_rate=0.96,	Tak	0.345887	2.27461	23.1986	0.22882	0.898591	6.00259	59.3177	1.48342	1.14901	8.45624	52.285	2.44101	0.365042	2.36643	24.9959	0.256887	0.97481	6.89861	50.7268	1.74975	0.979099	7.00343	54.4837	1.83678
0.5	Rendering 1	dataset09.01.2023	sieć mobilna B	MobileNet V3 Large	224		3	Poisson noise (strength 0.05)	650	0	5000	0	115	0	0	115	0	Nie	PiecewiseConstantDecay	Adam		decay_steps=100000, decay_rate=0.96,	Tak	0.105618	0.985709	5.48725	0.0241045	0.631492	4.36995	57.915	0.847455	0.849844	6.79213	45.7944	1.33534	0.083108	0.791168	4.15977	0.0156486	0.747973	5.56856	55.0113	1.06597	0.794279	5.84323	65.4757	1.11571
0.5	Rendering 1	dataset09.01.2023	sieć mobilna B	MobileNet V3 Large	224		3	Poisson noise (strength 0.05)	650	0	2500	0	115	0	0	115	0	Nie	PiecewiseConstantDecay	Adam		decay_steps=100000, decay_rate=0.96,	Tak	0.133772	1.23836	6.9443	0.0384522	0.722697	5.12974	47.1441	1.12702	1.06238	8.19269	49.3086	2.05533	0.113512	1.05425	5.84698	0.0285936	0.870624	6.49881	45.9877	1.45511	0.866572	6.46383	52.6268	1.43514
0.5	Rendering 1	dataset09.01.2023	sieć mobilna B	MobileNet V3 Large	224		3	Poisson noise (strength 0.05)	650	0	0	0	115	0	0	115	0	Nie	PiecewiseConstantDecay	Adam		decay_steps=100000, decay_rate=0.96,	Tak	0.184577	1.20454	12.8397	0.0592992	0.829645	5.75604	49.2456	1.39523	1.10697	8.4842	48.3537	2.23394	0.177579	1.15784	12.4772	0.0537023	0.97373	7.07168	50.2685	1.8126	0.910818	6.78901	50.0531	1.61639
0.5	Rendering 1	dataset09.01.2023	sieć mobilna B	MobileNet V3 Large	224	2	3	Poisson noise (strength 0.05)	650	0	5000	0	115	0	0	115	0	Tak	ExponentialDecay	Adam				0.425209	3.85324	21.7508	0.374435	0.675666	5.32931	33.9713	0.922671	0.714848	5.44351	41.1921	0.984722	0.342784	3.14141	17.496	0.242225	0.686584	5.40829	39.5996	0.954104	0.694281	5.36563	45.3466	0.976782
0.5	Rendering 1	dataset09.01.2023	sieć mobilna B	MobileNet V3 Large	224	2	3	Poisson noise (strength 0.05)	650	0	2500	0	115	0	0	115	0	Tak	ExponentialDecay	Adam				0.481725	4.29296	25.9263	0.465477	0.818588	6.24626	37.4354	1.37936	0.838681	6.23363	42.2	1.31936	0.377405	3.34534	20.1401	0.283051	0.858578	6.50787	40.3791	1.38777	0.815289	6.21487	40.4574	1.31603
0.5	Rendering 1	dataset09.01.2023	sieć mobilna B	MobileNet V3 Large	224	2	3	Poisson noise (strength 0.05)	650	0	0	0	115	0	0	115	0	Tak	ExponentialDecay	Adam				0.521946	3.48253	35.2912	0.465689	1.21604	8.44892	48.9442	2.58839	1.20471	8.27741	51.4073	2.54028	0.454307	3.04752	30.9827	0.360013	1.3398	9.10528	54.9325	2.91798	1.26314	8.66654	53.0798	2.7365
0.5	Rendering 1	dataset09.01.2023	sieć mobilna B	MobileNet V3 Large	224	2	3	Poisson noise (strength 0.05)	650	0	5000	0	115	0	0	115	0	Tak	ExponentialDecay	Adam				0.525014	4.86703	24.999	0.597373	0.881436	7.11637	84.4198	1.59832	0.959561	7.50079	94.5195	1.82663	0.368533	3.49296	17.9727	0.292592	0.920322	7.12056	87.4023	1.64374	0.841148	6.4917	88.0906	1.47131
0.5	Rendering 1	dataset09.01.2023	sieć mobilna B	MobileNet V3 Large	224	2	3	Poisson noise (strength 0.05)	650	0	2500	0	115	0	0	115	0	Tak	ExponentialDecay	Adam				0.981145	7.92316	46.653	1.91774	1.28011	8.66622	65.8318	2.90655	1.30136	8.63616	70.3799	3.0702	0.67312	5.85092	33.3434	0.966044	1.28234	8.75091	59.8021	3.06846	1.15804	8.0042	58.8658	2.67788
0.5	Rendering 1	dataset09.01.2023	sieć mobilna B	MobileNet V3 Large	224	2	3	Poisson noise (strength 0.05)	650	0	0	0	115	0	0	115	0	Tak	ExponentialDecay	Adam				2.01449	9.2139	86.9117	5.36977	1.89011	12.1812	91.4391	5.63617	1.61322	9.85063	80.9674	4.14645	0.909365	5.44964	52.2944	1.43901	1.34996	9.29356	54.6009	3.34824	1.35337	9.198	61.5764	3.30464
0.5	Rendering 1	dataset09.01.2023	sieć mobilna A	MobileNet V3 Large	224		3	Poisson noise (strength 0.05)	650	0	5000	0	115	0	0	115	0	Tak	CosineDecay	RMSprop	1		Tak	0.632	5.638	32.527	0.808	0.892	6.861	48.839	1.657	0.934	7.149	49.586	1.842	0.623	5.546	31.666	0.791	0.793	6.024	40.278	1.49	0.859	6.505	50.879	1.574
0.5	Rendering 1	dataset09.01.2023	sieć mobilna A	MobileNet V3 Large	224		3	Poisson noise (strength 0.05)	650	0	2500	0	115	0	0	115	0	Tak	CosineDecay	RMSprop	1		Tak	0.609	5.216	31.903	0.764	0.838	6.393	47.471	1.523	0.877	6.613	52.207	1.564	0.616	5.346	31.938	0.788	0.841	6.313	52.292	1.463	0.842	6.335	51.129	1.438
0.5	Rendering 1	dataset09.01.2023	sieć mobilna A	MobileNet V3 Large	224		3	Poisson noise (strength 0.05)	650	0	0	0	115	0	0	115	0	Tak	CosineDecay	RMSprop	1		Tak	0.479	3.163	30.663	0.447	0.773	5.984	41.428	1.262	0.842	6.427	44.475	1.48	0.543	3.541	35.483	0.523	0.807	6.09	44.876	1.257	0.799	5.994	47.016	1.235
0.5	Rendering 1	dataset09.01.2023	sieć mobilna A	MobileNet V3 Large	224		3	Poisson noise (strength 0.05)	650	0	5000	0	115	0	0	115	0	Tak	CosineDecay	RMSprop	1		Nie	0.25	2.309	12.828	0.133	0.861	6.693	51.328	1.262	0.795	6.197	44.99	1.106	0.251	2.336	12.676	0.131	0.785	5.933	49.39	1.1	0.799	6.137	53.376	1.162
0.5	Rendering 1	dataset09.01.2023	sieć mobilna A	MobileNet V3 Large	224		3	Poisson noise (strength 0.05)	650	0	2500	0	115	0	0	115	0	Tak	CosineDecay	RMSprop	1		Nie	0.239	2.172	12.314	0.12	0.761	5.852	39.616	1.02	0.779	5.882	46.89	1.035	0.238	2.145	12.489	0.116	0.711	5.456	37.334	0.899	0.707	5.362	39.545	0.86
0.5	Rendering 1	dataset09.01.2023	sieć mobilna A	MobileNet V3 Large	224		3	Poisson noise (strength 0.05)	650	0	0	0	115	0	0	115	0	Tak	CosineDecay	RMSprop	1		Nie	0.267	1.817	17.805	0.123	0.953	7.155	39.629	1.772	0.962	7.24	41.367	1.782	0.206	1.384	13.582	0.078	0.813	6.329	34.87	1.398	0.79	6.121	35.521	1.338
0.5	Rendering 1	dataset09.01.2023	sieć mobilna B	MobileNet V3 Large	224	#NAME?	3	Poisson noise (strength 0.05)	650	0	5000	0	115	0	0	115	0	Tak	PiecewiseConstantDecay	RMSprop	1e-05	decay_steps=100000, decay_rate=0.96,	Nie	0.581197	5.0803	30.9052	0.656157	0.885438	6.69117	72.8301	1.26913	0.804141	5.81503	65.2505	1.04549	0.565797	4.96776	30.3996	0.634513	0.912067	6.85581	79.5426	1.33894	0.967711	7.11444	84.9614	1.49106
0.5	Rendering 1	dataset09.01.2023	sieć mobilna B	MobileNet V3 Large	224	#NAME?	3	Poisson noise (strength 0.05)	650	0	2500	0	115	0	0	115	0	Tak	PiecewiseConstantDecay	RMSprop	1e-05	decay_steps=100000, decay_rate=0.96,	Nie	0.74351	6.23282	40.9307	1.04088	0.929739	6.95217	55.2488	1.55331	0.868314	6.34302	51.3505	1.25466	0.735601	6.16531	39.7775	1.02033	0.944237	7.13597	60.4922	1.59432	1.02012	7.41845	68.1213	1.77047
0.5	Rendering 1	dataset09.01.2023	sieć mobilna B	MobileNet V3 Large	224	#NAME?	3	Poisson noise (strength 0.05)	650	0	0	0	115	0	0	115	0	Tak	PiecewiseConstantDecay	RMSprop	1e-05	decay_steps=100000, decay_rate=0.96,	Nie	0.807475	5.00617	55.9961	1.07475	1.56542	10.2436	59.869	4.10348	1.4886	9.89176	58.7127	3.75336	0.822743	4.90592	58.4043	1.10499	1.46592	9.84457	55.8829	3.77651	1.42995	9.31583	57.5702	3.55709
0.5	Rendering 1	dataset09.01.2023	sieć mobilna B	MobileNet V3 Large	224	#NAME?	3	Poisson noise (strength 0.05)	650	0	5000	0	115	0	0	115	0	Tak	PiecewiseConstantDecay	RMSprop	0.001	decay_steps=100000, decay_rate=0.96,	Nie	0.165676	1.56879	8.23452	0.0645082	1.30817	9.29973	54.4362	2.79064	1.1752	7.94757	52.1127	2.14873	0.152453	1.45972	7.44421	0.0558106	1.23707	8.83519	52.8954	2.65957	1.26589	9.01232	53.2334	2.63248
0.5	Rendering 1	dataset09.01.2023	sieć mobilna B	MobileNet V3 Large	224	#NAME?	3	Poisson noise (strength 0.05)	650	0	2500	0	115	0	0	115	0	Tak	PiecewiseConstantDecay	RMSprop	0.001	decay_steps=100000, decay_rate=0.96,	Nie	0.243238	2.25752	12.4138	0.124852	0.637575	5.38144	31.4234	0.948434	0.529914	4.251	25.7849	0.626199	0.219055	2.00574	11.2133	0.10244	0.607566	5.1811	29.6375	0.899349	0.737193	5.97647	38.5853	1.06355
0.5	Rendering 1	dataset09.01.2023	sieć mobilna B	MobileNet V3 Large	224	#NAME?	3	Poisson noise (strength 0.05)	650	0	0	0	115	0	0	115	0	Tak	PiecewiseConstantDecay	RMSprop	0.001	decay_steps=100000, decay_rate=0.96,	Nie	0.277672	1.90063	18.3267	0.143593	1.04581	8.00376	41.964	2.1452	0.988471	7.64451	40.2376	2.03252	0.257625	1.71443	16.8288	0.118686	1.05686	8.02355	43.9098	2.24944	0.981172	7.41175	41.7459	1.97513
0.5	Rendering 1	dataset09.01.2023	sieć mobilna B	MobileNet V3 Large	224		3	Poisson noise (strength 0.05)	650	0	5000	0	115	0	0	115	0	Nie	PiecewiseConstantDecay	RMSprop		decay_steps=100000, decay_rate=0.96,	Tak	0.23292	2.10718	12.3514	0.111073	0.803144	5.58055	85.9295	1.13467	0.841919	6.57182	63.6929	1.22053	0.238357	2.17866	12.5045	0.118797	0.795352	5.81869	71.9834	1.11599	0.946451	6.94027	97.0168	1.40207
0.5	Rendering 1	dataset09.01.2023	sieć mobilna B	MobileNet V3 Large	224		3	Poisson noise (strength 0.05)	650	0	2500	0	115	0	0	115	0	Nie	PiecewiseConstantDecay	RMSprop		decay_steps=100000, decay_rate=0.96,	Tak	0.305763	2.66091	16.8546	0.188282	0.867212	6.03344	76.0944	1.35195	0.982566	7.53468	65.2051	1.65517	0.284589	2.48945	15.8293	0.165198	0.929298	6.81642	72.3499	1.41479	0.977339	7.11715	88.3501	1.50425
0.5	Rendering 1	dataset09.01.2023	sieć mobilna B	MobileNet V3 Large	224		3	Poisson noise (strength 0.05)	650	0	0	0	115	0	0	115	0	Nie	PiecewiseConstantDecay	RMSprop		decay_steps=100000, decay_rate=0.96,	Tak	0.358963	2.24089	26.2393	0.220041	0.933644	6.2217	68.1745	1.58976	1.14952	8.392	58.3442	2.38339	0.40405	2.5905	28.5335	0.261547	1.00185	7.05283	60.8558	1.89463	0.997635	7.07107	71.2699	1.82262
0.5	Rendering 1	dataset09.01.2023	sieć mobilna B	MobileNet V3 Large	224		3	Poisson noise (strength 0.05)	650	0	5000	0	115	0	0	115	0	Nie	PiecewiseConstantDecay	RMSprop		decay_steps=100000, decay_rate=0.96,	Tak	0.0558879	0.526593	2.82439	0.00697727	0.530727	3.68913	51.4241	0.541449	0.566615	4.68515	35.7159	0.590355	0.0419536	0.395722	2.12011	0.00394415	0.560455	4.3496	41.6277	0.600881	0.593472	4.41069	52.6828	0.646081
0.5	Rendering 1	dataset09.01.2023	sieć mobilna B	MobileNet V3 Large	224		3	Poisson noise (strength 0.05)	650	0	2500	0	115	0	0	115	0	Nie	PiecewiseConstantDecay	RMSprop		decay_steps=100000, decay_rate=0.96,	Tak	0.0626559	0.565752	3.34101	0.00859557	0.568834	4.02305	51.9556	0.597084	0.592126	4.86838	38.1768	0.661758	0.0432773	0.390234	2.30953	0.00400369	0.610618	4.76746	48.0091	0.750223	0.653153	4.91001	58.6996	0.766547
0.5	Rendering 1	dataset09.01.2023	sieć mobilna B	MobileNet V3 Large	224		3	Poisson noise (strength 0.05)	650	0	0	0	115	0	0	115	0	Nie	PiecewiseConstantDecay	RMSprop		decay_steps=100000, decay_rate=0.96,	Tak	0.142502	0.96532	9.47676	0.0360322	0.810252	5.73163	41.0527	1.41137	1.20857	9.13948	46.6749	2.72658	0.104304	0.715012	6.89638	0.020587	0.965575	7.12812	43.0018	1.87933	0.965933	7.23399	44.7354	2.0178
0.5	Rendering 1	dataset09.01.2023	sieć mobilna B	MobileNet V3 Large	224	2	3	Poisson noise (strength 0.05)	650	0	5000	0	115	0	0	115	0	Tak	ExponentialDecay	RMSprop				0.342784	3.18258	17.436	0.241322	0.985124	7.15228	44.2419	1.65867	1.00665	7.22479	48.7851	1.72389	0.277936	2.58044	14.3439	0.154797	0.950704	7.05452	45.3998	1.60587	0.935555	6.91891	48.4213	1.56963
0.5	Rendering 1	dataset09.01.2023	sieć mobilna B	MobileNet V3 Large	224	2	3	Poisson noise (strength 0.05)	650	0	2500	0	115	0	0	115	0	Tak	ExponentialDecay	RMSprop				0.449033	4.02015	23.6013	0.405302	0.737321	5.69869	35.5228	1.03267	0.704255	5.43334	35.4502	0.971352	0.358492	3.15513	19.0157	0.25524	1.21485	8.42169	52.0662	2.40456	1.14499	8.05044	49.4694	2.23712
0.5	Rendering 1	dataset09.01.2023	sieć mobilna B	MobileNet V3 Large	224	2	3	Poisson noise (strength 0.05)	650	0	0	0	115	0	0	115	0	Tak	ExponentialDecay	RMSprop				0.522683	3.25441	36.1613	0.451062	1.19997	8.36143	49.874	2.47518	1.11323	7.85993	47.3827	2.20458	0.506791	3.39175	34.3881	0.433421	1.34593	9.13686	55.2293	2.94482	1.26798	8.69893	53.3442	2.69684
0.5	Rendering 1	dataset09.01.2023	sieć mobilna B	MobileNet V3 Large	224	2	3	Poisson noise (strength 0.05)	650	0	5000	0	115	0	0	115	0	Tak	ExponentialDecay	RMSprop				2.4232	15.4237	90.9886	8.74036	1.96337	11.5129	71.1512	5.96439	1.9146	11.1754	70.6024	5.7597	2.43185	15.4502	90.5847	8.79786	1.94562	11.5532	71.0415	5.96607	1.88891	11.2451	70.2064	5.83192
0.5	Rendering 1	dataset09.01.2023	sieć mobilna B	MobileNet V3 Large	224	2	3	Poisson noise (strength 0.05)	650	0	2500	0	115	0	0	115	0	Tak	ExponentialDecay	RMSprop				1.459	10.8998	67.1584	3.94541	1.72533	10.2813	67.9544	4.54478	1.66676	9.97404	65.9901	4.38476	0.672538	5.69294	32.5617	1.0536	0.79049	5.76025	39.4067	1.28737	0.767183	5.63905	41.3624	1.14269
0.5	Rendering 1	dataset09.01.2023	sieć mobilna B	MobileNet V3 Large	224	2	3	Poisson noise (strength 0.05)	650	0	0	0	115	0	0	115	0	Tak	ExponentialDecay	RMSprop				1.64297	11.5693	167.537	5.18232	3.08191	13.3725	98.0529	11.7637	3.03305	13.0283	98.6047	11.4421	1.57185	8.17594	69.3696	3.58273	1.90332	11.4293	69.9696	5.78081	1.85174	11.1362	69.7838	5.6547
0.5	Rendering 1	dataset09.01.2023	sieć mobilna A	MobileNet V3 Large	224		4	Poisson noise (strength 0.1)	650	0	5000	0	115	0	0	115	0	Tak	CosineDecay	Adam	1		Tak	0.709	6.194	35.579	1.037	0.757	5.975	45.584	1.275	0.836	6.44	53.357	1.515	0.729	6.377	35.916	1.09	0.741	5.643	44.707	1.25	0.775	5.899	55.259	1.327
0.5	Rendering 1	dataset09.01.2023	sieć mobilna A	MobileNet V3 Large	224		4	Poisson noise (strength 0.1)	650	0	2500	0	115	0	0	115	0	Tak	CosineDecay	Adam	1		Tak	0.686	5.956	34.09	0.987	0.856	6.528	54.516	1.489	0.853	6.464	56.64	1.536	0.709	6.166	35.294	1.044	0.836	6.317	56.467	1.455	0.834	6.187	55.285	1.387
0.5	Rendering 1	dataset09.01.2023	sieć mobilna A	MobileNet V3 Large	224		4	Poisson noise (strength 0.1)	650	0	0	0	115	0	0	115	0	Tak	CosineDecay	Adam	1		Tak	0.59	3.805	37.575	0.62	0.901	6.768	45.781	1.719	0.967	7.16	51.873	1.825	0.571	3.676	35.048	0.617	0.952	7.035	53.347	1.71	0.885	6.588	46.351	1.585
0.5	Rendering 1	dataset09.01.2023	sieć mobilna A	MobileNet V3 Large	224		4	Poisson noise (strength 0.1)	650	0	5000	0	115	0	0	115	0	Tak	CosineDecay	Adam	1		Nie	0.266	2.478	13.445	0.149	0.676	5.385	43.222	0.91	0.674	5.228	46.844	0.924	0.264	2.45	13.505	0.146	0.637	5.06	39.456	0.849	0.683	5.306	46.905	0.941
0.5	Rendering 1	dataset09.01.2023	sieć mobilna A	MobileNet V3 Large	224		4	Poisson noise (strength 0.1)	650	0	2500	0	115	0	0	115	0	Tak	CosineDecay	Adam	1		Nie	0.237	2.148	12.412	0.117	0.63	4.984	42.999	0.859	0.641	5.042	44.716	0.901	0.249	2.299	12.695	0.13	0.623	4.904	42.29	0.805	0.601	4.627	41.051	0.77
0.5	Rendering 1	dataset09.01.2023	sieć mobilna A	MobileNet V3 Large	224		4	Poisson noise (strength 0.1)	650	0	0	0	115	0	0	115	0	Tak	CosineDecay	Adam	1		Nie	0.258	1.755	17.038	0.118	0.914	6.988	37.776	1.766	0.955	7.254	39.628	1.925	0.23	1.589	14.934	0.1	0.919	6.99	38.474	1.781	0.897	6.781	39.799	1.691
0.5	Rendering 1	dataset09.01.2023	sieć mobilna B	MobileNet V3 Large	224	#NAME?	4	Poisson noise (strength 0.1)	650	0	5000	0	115	0	0	115	0	Tak	PiecewiseConstantDecay	Adam	1e-05	decay_steps=100000, decay_rate=0.96,	Nie	0.775081	6.63838	41.0244	1.15366	1.2325	8.70678	53.4357	2.74081	1.13116	8.05998	48.8848	2.49178	0.766088	6.57794	40.3835	1.11518	1.2752	9.10787	54.7088	2.92021	1.24494	8.88732	52.7911	2.85008
0.5	Rendering 1	dataset09.01.2023	sieć mobilna B	MobileNet V3 Large	224	#NAME?	4	Poisson noise (strength 0.1)	650	0	2500	0	115	0	0	115	0	Tak	PiecewiseConstantDecay	Adam	1e-05	decay_steps=100000, decay_rate=0.96,	Nie	0.83931	7.00047	44.6041	1.32384	1.31362	8.96531	60.1959	2.94819	1.22741	8.52311	53.8012	2.87821	0.841574	6.96196	44.3227	1.32683	1.36505	9.51148	59.7187	3.21357	1.24615	8.79927	53.6316	2.86333
0.5	Rendering 1	dataset09.01.2023	sieć mobilna B	MobileNet V3 Large	224	#NAME?	4	Poisson noise (strength 0.1)	650	0	0	0	115	0	0	115	0	Tak	PiecewiseConstantDecay	Adam	1e-05	decay_steps=100000, decay_rate=0.96,	Nie	0.970884	5.69352	66.7359	1.47337	1.53453	10.1445	60.8893	3.89894	1.46203	9.55369	62.7029	3.82858	0.960524	5.66462	67.7292	1.4903	1.57459	10.4881	66.6318	4.10123	1.55136	10.3346	61.233	4.26886
0.5	Rendering 1	dataset09.01.2023	sieć mobilna B	MobileNet V3 Large	224	#NAME?	4	Poisson noise (strength 0.1)	650	0	5000	0	115	0	0	115	0	Tak	PiecewiseConstantDecay	Adam	0.001	decay_steps=100000, decay_rate=0.96,	Nie	0.284327	2.65441	14.253	0.173103	0.975392	7.4931	57.449	1.73558	0.896615	6.62098	53.859	1.44825	0.264031	2.48747	13.2353	0.147974	0.959467	7.29768	60.9249	1.64948	1.03549	7.75602	66.4369	1.81458
0.5	Rendering 1	dataset09.01.2023	sieć mobilna B	MobileNet V3 Large	224	#NAME?	4	Poisson noise (strength 0.1)	650	0	2500	0	115	0	0	115	0	Tak	PiecewiseConstantDecay	Adam	0.001	decay_steps=100000, decay_rate=0.96,	Nie	0.318338	2.84494	16.7813	0.208147	0.909557	6.74588	60.9656	1.37674	0.82888	6.33361	52.1432	1.26608	0.317302	2.84441	16.5742	0.208717	0.97307	7.47757	59.3709	1.5809	0.870067	6.76285	54.3549	1.41737
0.5	Rendering 1	dataset09.01.2023	sieć mobilna B	MobileNet V3 Large	224	#NAME?	4	Poisson noise (strength 0.1)	650	0	0	0	115	0	0	115	0	Tak	PiecewiseConstantDecay	Adam	0.001	decay_steps=100000, decay_rate=0.96,	Nie	0.397322	2.64705	26.6307	0.275051	0.886141	6.775	44.5666	1.50601	0.846588	6.48744	42.1569	1.39909	0.409674	2.68909	26.8358	0.292261	0.920923	7.19531	46.5901	1.61748	0.881678	6.94566	42.504	1.5213
0.5	Rendering 1	dataset09.01.2023	sieć mobilna B	MobileNet V3 Large	224		4	Poisson noise (strength 0.1)	650	0	5000	0	115	0	0	115	0	Nie	PiecewiseConstantDecay	Adam		decay_steps=100000, decay_rate=0.96,	Tak	0.388358	3.5364	20.5823	0.318559	0.76054	5.24788	59.0572	1.18368	0.895336	6.98102	44.9071	1.58152	0.383519	3.50436	20.1612	0.302458	0.819954	6.09302	47.8801	1.31204	0.881407	6.48662	60.8938	1.50091
0.5	Rendering 1	dataset09.01.2023	sieć mobilna B	MobileNet V3 Large	224		4	Poisson noise (strength 0.1)	650	0	2500	0	115	0	0	115	0	Nie	PiecewiseConstantDecay	Adam		decay_steps=100000, decay_rate=0.96,	Tak	0.471983	4.13117	25.4817	0.454575	0.790933	5.46819	65.796	1.18945	0.966982	7.47051	54.7732	1.64858	0.47145	4.09939	25.4085	0.45031	0.847938	6.14587	55.7135	1.32479	0.879284	6.32558	66.1276	1.33528
0.5	Rendering 1	dataset09.01.2023	sieć mobilna B	MobileNet V3 Large	224		4	Poisson noise (strength 0.1)	650	0	0	0	115	0	0	115	0	Nie	PiecewiseConstantDecay	Adam		decay_steps=100000, decay_rate=0.96,	Tak	0.425714	2.76621	28.4406	0.313281	0.872479	5.79667	51.2901	1.52708	1.31806	9.38119	59.9266	2.9185	0.420399	2.71857	28.9508	0.307274	1.02538	7.06047	51.5117	1.88097	1.07666	7.55852	61.2915	2.22303
0.5	Rendering 1	dataset09.01.2023	sieć mobilna B	MobileNet V3 Large	224		4	Poisson noise (strength 0.1)	650	0	5000	0	115	0	0	115	0	Nie	PiecewiseConstantDecay	Adam		decay_steps=100000, decay_rate=0.96,	Tak	0.128519	1.21436	6.50723	0.0376445	0.660179	4.59154	57.3768	0.931068	0.888148	6.97334	48.3448	1.42835	0.102457	0.976334	5.13118	0.0254913	0.776491	5.8013	53.7794	1.20346	0.842868	6.22028	64.4727	1.38123
0.5	Rendering 1	dataset09.01.2023	sieć mobilna B	MobileNet V3 Large	224		4	Poisson noise (strength 0.1)	650	0	2500	0	115	0	0	115	0	Nie	PiecewiseConstantDecay	Adam		decay_steps=100000, decay_rate=0.96,	Tak	0.194513	1.81648	9.83454	0.0851832	0.637126	4.62402	43.2193	0.959799	0.854097	6.83121	40.2466	1.50887	0.169742	1.56809	8.74514	0.0664137	0.757878	5.75072	44.1214	1.12386	0.800416	6.04375	48.9105	1.30934
0.5	Rendering 1	dataset09.01.2023	sieć mobilna B	MobileNet V3 Large	224		4	Poisson noise (strength 0.1)	650	0	0	0	115	0	0	115	0	Nie	PiecewiseConstantDecay	Adam		decay_steps=100000, decay_rate=0.96,	Tak	0.187171	1.25655	12.8825	0.0640139	0.806048	5.66848	45.5827	1.38845	1.09944	8.43082	47.6336	2.24682	0.199269	1.32396	13.2755	0.0691545	0.939777	6.94162	45.511	1.71674	0.886538	6.65006	46.8851	1.6545
0.5	Rendering 1	dataset09.01.2023	sieć mobilna B	MobileNet V3 Large	224	2	4	Poisson noise (strength 0.1)	650	0	5000	0	115	0	0	115	0	Tak	ExponentialDecay	Adam				0.440497	4.03029	22.2937	0.400549	0.824841	6.30164	38.209	1.34953	0.845233	6.35886	45.1639	1.36645	0.358025	3.31752	18.0955	0.2696	0.796225	6.11589	42.978	1.19571	0.750704	5.73736	44.3117	1.08314
0.5	Rendering 1	dataset09.01.2023	sieć mobilna B	MobileNet V3 Large	224	2	4	Poisson noise (strength 0.1)	650	0	2500	0	115	0	0	115	0	Tak	ExponentialDecay	Adam				0.491153	4.25339	25.89	0.494393	0.861921	6.47636	38.8433	1.46858	0.891143	6.58379	44.6774	1.53447	0.408829	3.61376	21.5051	0.337182	0.920875	6.83373	45.4487	1.55922	0.873905	6.53295	44.5796	1.44929
0.5	Rendering 1	dataset09.01.2023	sieć mobilna B	MobileNet V3 Large	224	2	4	Poisson noise (strength 0.1)	650	0	0	0	115	0	0	115	0	Tak	ExponentialDecay	Adam				0.623747	4.01959	42.2313	0.672047	1.14869	8.11027	48.3912	2.38152	1.12699	7.92101	48.7873	2.30141	0.524159	3.41594	35.3668	0.467226	1.29304	8.90138	53.567	2.78374	1.24676	8.60834	51.7757	2.69921
0.5	Rendering 1	dataset09.01.2023	sieć mobilna B	MobileNet V3 Large	224	2	4	Poisson noise (strength 0.1)	650	0	5000	0	115	0	0	115	0	Tak	ExponentialDecay	Adam				0.637732	5.60129	31.5584	0.861515	1.51229	10.0558	110.176	3.99438	1.59114	10.6146	140.879	4.223	0.503334	4.60749	24.6573	0.555207	1.50896	9.90868	84.9573	3.94841	1.44139	9.65324	107.317	3.76419
0.5	Rendering 1	dataset09.01.2023	sieć mobilna B	MobileNet V3 Large	224	2	4	Poisson noise (strength 0.1)	650	0	2500	0	115	0	0	115	0	Tak	ExponentialDecay	Adam				0.79623	6.75615	37.7582	1.36705	1.62514	9.94245	67.1486	4.18177	1.6019	9.71174	67.6901	3.99546	0.609219	5.38479	29.0712	0.841751	1.58007	9.79377	63.3546	4.06385	1.5039	9.28097	64.4052	3.72242
0.5	Rendering 1	dataset09.01.2023	sieć mobilna B	MobileNet V3 Large	224	2	4	Poisson noise (strength 0.1)	650	0	0	0	115	0	0	115	0	Tak	ExponentialDecay	Adam				0.745238	4.80938	46.5312	1.08122	1.30722	8.98668	50.5686	3.18075	1.30926	8.98415	52.0472	3.22175	0.631381	4.06988	36.8104	0.833631	1.42302	9.58217	54.303	3.6626	1.36461	9.23551	52.3041	3.59063
0.5	Rendering 1	dataset09.01.2023	sieć mobilna A	MobileNet V3 Large	224		4	Poisson noise (strength 0.1)	650	0	5000	0	115	0	0	115	0	Tak	CosineDecay	RMSprop	1		Tak	0.671	5.951	34.121	0.929	0.827	6.455	51.374	1.438	0.874	6.707	55.319	1.492	0.684	6.062	34.479	0.968	0.764	5.85	46.327	1.246	0.844	6.324	60.324	1.374
0.5	Rendering 1	dataset09.01.2023	sieć mobilna A	MobileNet V3 Large	224		4	Poisson noise (strength 0.1)	650	0	2500	0	115	0	0	115	0	Tak	CosineDecay	RMSprop	1		Tak	0.64	5.54	32.901	0.822	0.768	5.921	46.499	1.261	0.779	5.907	49.617	1.287	0.621	5.38	31.987	0.781	0.755	5.767	48.835	1.2	0.735	5.518	49.538	1.07
0.5	Rendering 1	dataset09.01.2023	sieć mobilna A	MobileNet V3 Large	224		4	Poisson noise (strength 0.1)	650	0	0	0	115	0	0	115	0	Tak	CosineDecay	RMSprop	1		Tak	0.529	3.434	33.857	0.535	0.814	6.247	42.037	1.509	0.852	6.538	43.892	1.578	0.535	3.5	34.471	0.556	0.833	6.337	42.035	1.49	0.806	6.112	45.182	1.345
0.5	Rendering 1	dataset09.01.2023	sieć mobilna A	MobileNet V3 Large	224		4	Poisson noise (strength 0.1)	650	0	5000	0	115	0	0	115	0	Tak	CosineDecay	RMSprop	1		Nie	0.267	2.487	13.522	0.15	0.645	5.174	56.164	0.958	0.611	4.995	50.578	0.904	0.271	2.535	13.699	0.152	0.647	5.145	54.396	0.969	0.654	5.179	61.512	0.987
0.5	Rendering 1	dataset09.01.2023	sieć mobilna A	MobileNet V3 Large	224		4	Poisson noise (strength 0.1)	650	0	2500	0	115	0	0	115	0	Tak	CosineDecay	RMSprop	1		Nie	0.25	2.313	12.762	0.134	0.727	5.694	39.753	1.004	0.756	5.875	43.307	1.085	0.253	2.315	13.016	0.133	0.659	5.214	33.651	0.859	0.68	5.223	38.518	0.824
0.5	Rendering 1	dataset09.01.2023	sieć mobilna A	MobileNet V3 Large	224		4	Poisson noise (strength 0.1)	650	0	0	0	115	0	0	115	0	Tak	CosineDecay	RMSprop	1		Nie	0.271	1.772	18.541	0.131	0.828	6.379	34.152	1.571	0.832	6.425	34.773	1.648	0.222	1.483	14.647	0.088	0.94	7.08	37.654	1.874	0.91	6.852	38.099	1.71
0.5	Rendering 1	dataset09.01.2023	sieć mobilna B	MobileNet V3 Large	224	#NAME?	4	Poisson noise (strength 0.1)	650	0	5000	0	115	0	0	115	0	Tak	PiecewiseConstantDecay	RMSprop	1e-05	decay_steps=100000, decay_rate=0.96,	Nie	0.623086	5.45046	32.8209	0.761896	0.899179	6.70105	68.0499	1.27133	0.835121	6.25705	61.6782	1.21142	0.615286	5.42276	32.3046	0.752578	0.950225	7.15352	68.1751	1.4852	0.867582	6.63971	60.4953	1.32461
0.5	Rendering 1	dataset09.01.2023	sieć mobilna B	MobileNet V3 Large	224	#NAME?	4	Poisson noise (strength 0.1)	650	0	2500	0	115	0	0	115	0	Tak	PiecewiseConstantDecay	RMSprop	1e-05	decay_steps=100000, decay_rate=0.96,	Nie	0.785692	6.4769	42.6323	1.20533	0.900184	6.79835	49.9392	1.46479	0.880174	6.59631	50.1428	1.48617	0.758189	6.22967	42.0334	1.09047	0.980648	7.46208	58.522	1.65865	0.965834	7.41911	55.246	1.7436
0.5	Rendering 1	dataset09.01.2023	sieć mobilna B	MobileNet V3 Large	224	#NAME?	4	Poisson noise (strength 0.1)	650	0	0	0	115	0	0	115	0	Tak	PiecewiseConstantDecay	RMSprop	1e-05	decay_steps=100000, decay_rate=0.96,	Nie	1.05147	6.11233	67.3393	1.80571	1.12311	8.04889	58.8202	2.20388	1.0768	7.69826	56.4358	2.12197	0.99587	5.79269	65.9156	1.56267	1.16555	8.50183	53.6387	2.61608	1.21309	8.72889	61.223	2.49207
0.5	Rendering 1	dataset09.01.2023	sieć mobilna B	MobileNet V3 Large	224	#NAME?	4	Poisson noise (strength 0.1)	650	0	5000	0	115	0	0	115	0	Tak	PiecewiseConstantDecay	RMSprop	0.001	decay_steps=100000, decay_rate=0.96,	Nie	0.224652	2.13815	10.9333	0.111563	0.887601	6.66921	53.2385	1.24119	0.821313	6.27682	45.9613	1.18587	0.212702	2.01759	10.5532	0.098804	0.945511	7.28721	51.3382	1.52277	0.932879	7.14483	51.6617	1.44733
0.5	Rendering 1	dataset09.01.2023	sieć mobilna B	MobileNet V3 Large	224	#NAME?	4	Poisson noise (strength 0.1)	650	0	2500	0	115	0	0	115	0	Tak	PiecewiseConstantDecay	RMSprop	0.001	decay_steps=100000, decay_rate=0.96,	Nie	0.245693	2.24676	12.6608	0.126804	0.819738	6.43679	48.8814	1.25029	0.780393	6.22828	41.0394	1.32681	0.231146	2.13601	11.7329	0.113401	0.794362	6.45192	46.1485	1.28121	0.795591	6.46756	46.2477	1.32258
0.5	Rendering 1	dataset09.01.2023	sieć mobilna B	MobileNet V3 Large	224	#NAME?	4	Poisson noise (strength 0.1)	650	0	0	0	115	0	0	115	0	Tak	PiecewiseConstantDecay	RMSprop	0.001	decay_steps=100000, decay_rate=0.96,	Nie	0.328947	2.20848	21.6365	0.187915	1.05657	7.86461	49.9311	2.03131	1.00442	7.49538	45.6241	2.01835	0.290207	1.95422	19.398	0.154961	1.01534	7.79889	47.4893	2.03352	1.01662	7.80632	46.5458	2.01414
0.5	Rendering 1	dataset09.01.2023	sieć mobilna B	MobileNet V3 Large	224		4	Poisson noise (strength 0.1)	650	0	5000	0	115	0	0	115	0	Nie	PiecewiseConstantDecay	RMSprop		decay_steps=100000, decay_rate=0.96,	Tak	0.291708	2.67017	15.1734	0.18337	0.802556	5.61768	77.7579	1.0561	0.859244	6.74113	61.8395	1.19125	0.301794	2.75028	16.0343	0.193738	0.859455	6.27129	70.6498	1.19283	0.877215	6.23487	84.6498	1.17941
0.5	Rendering 1	dataset09.01.2023	sieć mobilna B	MobileNet V3 Large	224		4	Poisson noise (strength 0.1)	650	0	2500	0	115	0	0	115	0	Nie	PiecewiseConstantDecay	RMSprop		decay_steps=100000, decay_rate=0.96,	Tak	0.372945	3.28626	20.2742	0.288047	0.833174	5.7776	75.9724	1.24614	0.851431	6.70405	49.6225	1.38101	0.373268	3.30465	20.1378	0.285114	0.81644	5.9627	60.8027	1.21417	0.859336	6.30377	74.7149	1.25359
0.5	Rendering 1	dataset09.01.2023	sieć mobilna B	MobileNet V3 Large	224		4	Poisson noise (strength 0.1)	650	0	0	0	115	0	0	115	0	Nie	PiecewiseConstantDecay	RMSprop		decay_steps=100000, decay_rate=0.96,	Tak	0.417662	2.63878	28.8735	0.315267	0.887215	5.95196	56.1728	1.48416	1.10802	7.90037	52.2192	2.24695	0.467099	2.93982	32.9885	0.367745	1.05553	7.30405	58.2837	1.98396	1.0058	7.05015	58.7602	1.94063
0.5	Rendering 1	dataset09.01.2023	sieć mobilna B	MobileNet V3 Large	224		4	Poisson noise (strength 0.1)	650	0	5000	0	115	0	0	115	0	Nie	PiecewiseConstantDecay	RMSprop		decay_steps=100000, decay_rate=0.96,	Tak	0.0687296	0.650459	3.45894	0.0104947	0.652217	4.76751	63.2439	0.83784	0.59223	4.93167	39.9905	0.665408	0.0543885	0.519333	2.69599	0.0068232	0.654647	5.07393	58.356	0.858757	0.711566	5.40246	69.7	0.982221
0.5	Rendering 1	dataset09.01.2023	sieć mobilna B	MobileNet V3 Large	224		4	Poisson noise (strength 0.1)	650	0	2500	0	115	0	0	115	0	Nie	PiecewiseConstantDecay	RMSprop		decay_steps=100000, decay_rate=0.96,	Tak	0.0806537	0.746351	4.1964	0.014898	0.574003	4.17316	52.5547	0.657831	0.51315	4.32214	31.4801	0.541991	0.0591421	0.54877	3.03941	0.00816967	0.555411	4.22167	45.9333	0.602742	0.623365	4.74605	57.217	0.78995
0.5	Rendering 1	dataset09.01.2023	sieć mobilna B	MobileNet V3 Large	224		4	Poisson noise (strength 0.1)	650	0	0	0	115	0	0	115	0	Nie	PiecewiseConstantDecay	RMSprop		decay_steps=100000, decay_rate=0.96,	Tak	0.145231	0.98724	9.64068	0.0384618	0.766445	5.47013	41.0506	1.23542	1.20114	9.00994	49.0496	2.59956	0.115086	0.782452	7.68433	0.0256151	0.894013	6.66184	40.3339	1.60648	0.940669	7.01411	47.2914	1.8328
0.5	Rendering 1	dataset09.01.2023	sieć mobilna B	MobileNet V3 Large	224	2	4	Poisson noise (strength 0.1)	650	0	5000	0	115	0	0	115	0	Tak	ExponentialDecay	RMSprop				0.380698	3.51893	19.3641	0.293089	0.840623	6.21298	42.6937	1.24044	0.852691	6.16474	48.4773	1.29317	0.31486	2.93399	16.1537	0.203845	1.08453	7.62105	55.959	1.90621	1.04456	7.25941	58.1769	1.79491
0.5	Rendering 1	dataset09.01.2023	sieć mobilna B	MobileNet V3 Large	224	2	4	Poisson noise (strength 0.1)	650	0	2500	0	115	0	0	115	0	Tak	ExponentialDecay	RMSprop				0.405796	3.64671	21.4628	0.335777	0.637324	4.95939	34.1395	0.811968	0.639496	4.87929	37.7743	0.807346	0.353566	3.20057	18.4081	0.252851	1.01256	7.43098	46.8428	1.82748	0.992493	7.29017	48.1879	1.74894
0.5	Rendering 1	dataset09.01.2023	sieć mobilna B	MobileNet V3 Large	224	2	4	Poisson noise (strength 0.1)	650	0	0	0	115	0	0	115	0	Tak	ExponentialDecay	RMSprop				0.667828	4.38936	45.342	0.749886	1.06624	7.7589	43.7438	2.14375	1.07088	7.66215	47.5168	2.08685	0.42016	2.76744	27.8868	0.303898	1.38647	9.35977	55.9636	3.13975	1.32943	9.00363	55.2135	2.94131
0.5	Rendering 1	dataset09.01.2023	sieć mobilna B	MobileNet V3 Large	224	2	4	Poisson noise (strength 0.1)	650	0	5000	0	115	0	0	115	0	Tak	ExponentialDecay	RMSprop				2.38152	15.132	91.4466	8.42684	1.96262	11.5107	71.132	5.96102	1.91387	11.1733	70.5854	5.75642	2.38348	15.1378	91.3987	8.4391	1.94418	11.549	71.0056	5.95968	1.88765	11.2414	70.1922	5.8258
0.5	Rendering 1	dataset09.01.2023	sieć mobilna B	MobileNet V3 Large	224	2	4	Poisson noise (strength 0.1)	650	0	2500	0	115	0	0	115	0	Tak	ExponentialDecay	RMSprop				2.33207	14.6611	89.7416	8.1805	1.95305	11.4835	70.8869	5.91824	1.90449	11.1466	70.3684	5.71473	2.33459	14.7692	97.8275	8.2486	1.95605	11.5831	71.3076	6.01221	1.89815	11.2716	70.3254	5.87608
0.5	Rendering 1	dataset09.01.2023	sieć mobilna B	MobileNet V3 Large	224	2	4	Poisson noise (strength 0.1)	650	0	0	0	115	0	0	115	0	Tak	ExponentialDecay	RMSprop				1.30123	9.25646	107.651	3.00857	1.56922	12.2016	189.8	3.34473	1.55648	12.1986	191.581	3.53884	2.01893	15.2437	177.473	7.51956	1.99414	11.5194	75.5834	5.74241	1.91064	11.1341	73.7934	5.46835
0.5	Rendering 1	dataset09.01.2023	sieć mobilna B	MobileNet V3 Large	224	1.66667	3	Rotation	650	0	5000	0	115	0	0	115	0	Tak	PiecewiseConstantDecay	Adam	1e-05	decay_steps=100000, decay_rate=0.96,	Tak	0.974653	7.83474	50.7319	1.78926	1.16544	8.33186	61.3812	2.43559	1.1467	8.06913	61.1893	2.36268	0.967309	7.75809	48.9837	1.74723	1.12957	8.26007	57.5664	2.31202	1.14516	7.90385	66.6624	2.24553
0.5	Rendering 1	dataset09.01.2023	sieć mobilna B	MobileNet V3 Large	224	1.66667	3	Rotation	650	0	2500	0	115	0	0	115	0	Tak	PiecewiseConstantDecay	Adam	1e-05	decay_steps=100000, decay_rate=0.96,	Tak	1.10062	8.57933	55.448	2.22488	1.38329	9.3575	64.8113	3.45619	1.25912	8.3476	58.4728	2.84931	1.07632	8.4315	56.0863	2.12678	1.40655	9.43901	62.9955	3.36119	1.26731	8.24248	60.2719	2.79418
0.5	Rendering 1	dataset09.01.2023	sieć mobilna B	MobileNet V3 Large	224	1.66667	3	Rotation	650	0	0	0	115	0	0	115	0	Tak	PiecewiseConstantDecay	Adam	1e-05	decay_steps=100000, decay_rate=0.96,	Tak	1.36536	7.15358	86.7303	2.91998	1.45336	9.4605	76.5275	3.755	1.51825	9.51173	86.215	3.93605	1.35357	7.59939	90.8427	3.0557	1.37674	9.23447	75.5656	3.33425	1.46233	9.11456	85.1481	3.37044
0.5	Rendering 1	dataset09.01.2023	sieć mobilna B	MobileNet V3 Large	224	1.66667	3	Rotation	650	0	5000	0	115	0	0	115	0	Tak	PiecewiseConstantDecay	Adam	1e-05	decay_steps=100000, decay_rate=0.96,	Nie	0.974653	7.83474	50.7319	1.78926	1.16544	8.33186	61.3812	2.43559	1.1467	8.06913	61.1893	2.36268	0.967309	7.75809	48.9837	1.74723	1.12957	8.26007	57.5664	2.31202	1.14516	7.90385	66.6624	2.24553
0.5	Rendering 1	dataset09.01.2023	sieć mobilna B	MobileNet V3 Large	224	1.66667	3	Rotation	650	0	2500	0	115	0	0	115	0	Tak	PiecewiseConstantDecay	Adam	1e-05	decay_steps=100000, decay_rate=0.96,	Nie	1.10062	8.57933	55.448	2.22488	1.38329	9.3575	64.8113	3.45619	1.25912	8.3476	58.4728	2.84931	1.07632	8.4315	56.0863	2.12678	1.40655	9.43901	62.9955	3.36119	1.26731	8.24248	60.2719	2.79418
0.5	Rendering 1	dataset09.01.2023	sieć mobilna B	MobileNet V3 Large	224	1.66667	3	Rotation	650	0	0	0	115	0	0	115	0	Tak	PiecewiseConstantDecay	Adam	1e-05	decay_steps=100000, decay_rate=0.96,	Nie	1.36536	7.15358	86.7303	2.91998	1.45336	9.4605	76.5275	3.755	1.51825	9.51173	86.215	3.93605	1.35357	7.59939	90.8427	3.0557	1.37674	9.23447	75.5656	3.33425	1.46233	9.11456	85.1481	3.37044
0.5	Rendering 1	dataset09.01.2023	sieć mobilna B	MobileNet V3 Large	224	1.66667	3	Rotation	650	0	5000	0	115	0	0	115	0	Tak	PiecewiseConstantDecay	Adam	0.001	decay_steps=100000, decay_rate=0.96,	Tak	0.382816	3.49048	19.2582	0.310453	1.02914	7.31044	49.6293	1.83353	1.03023	7.01103	51.0332	1.73612	0.380772	3.50392	18.9441	0.313717	0.990197	7.14359	45.4205	1.69233	0.975132	6.568	51.4081	1.56667
0.5	Rendering 1	dataset09.01.2023	sieć mobilna B	MobileNet V3 Large	224	1.66667	3	Rotation	650	0	2500	0	115	0	0	115	0	Tak	PiecewiseConstantDecay	Adam	0.001	decay_steps=100000, decay_rate=0.96,	Tak	0.51488	4.49635	25.223	0.546655	0.752722	5.77126	55.8691	1.0461	0.708125	5.27398	52.9444	0.970687	0.513355	4.52167	25.8988	0.542182	0.770186	5.8435	54.1185	1.0515	0.705626	5.12407	55.8716	0.944301
0.5	Rendering 1	dataset09.01.2023	sieć mobilna B	MobileNet V3 Large	224	1.66667	3	Rotation	650	0	0	0	115	0	0	115	0	Tak	PiecewiseConstantDecay	Adam	0.001	decay_steps=100000, decay_rate=0.96,	Tak	0.697432	4.35687	41.2485	0.93494	1.12871	8.15209	47.7301	2.39407	1.058	7.50657	44.2335	2.10089	0.708338	4.55497	41.428	0.986268	1.10188	8.07787	43.9813	2.37841	1.0304	7.23405	44.8159	1.85485
0.5	Rendering 1	dataset09.01.2023	sieć mobilna B	MobileNet V3 Large	224	1.66667	3	Rotation	650	0	5000	0	115	0	0	115	0	Tak	PiecewiseConstantDecay	Adam	0.001	decay_steps=100000, decay_rate=0.96,	Nie	0.382816	3.49048	19.2582	0.310453	1.02914	7.31044	49.6293	1.83353	1.03023	7.01103	51.0332	1.73612	0.380772	3.50392	18.9441	0.313717	0.990197	7.14359	45.4205	1.69233	0.975132	6.568	51.4081	1.56667
0.5	Rendering 1	dataset09.01.2023	sieć mobilna B	MobileNet V3 Large	224	1.66667	3	Rotation	650	0	2500	0	115	0	0	115	0	Tak	PiecewiseConstantDecay	Adam	0.001	decay_steps=100000, decay_rate=0.96,	Nie	0.51488	4.49635	25.223	0.546655	0.752722	5.77126	55.8691	1.0461	0.708125	5.27398	52.9444	0.970687	0.513355	4.52167	25.8988	0.542182	0.770186	5.8435	54.1185	1.0515	0.705626	5.12407	55.8716	0.944301
0.5	Rendering 1	dataset09.01.2023	sieć mobilna B	MobileNet V3 Large	224	1.66667	3	Rotation	650	0	0	0	115	0	0	115	0	Tak	PiecewiseConstantDecay	Adam	0.001	decay_steps=100000, decay_rate=0.96,	Nie	0.697432	4.35687	41.2485	0.93494	1.12871	8.15209	47.7301	2.39407	1.058	7.50657	44.2335	2.10089	0.708338	4.55497	41.428	0.986268	1.10188	8.07787	43.9813	2.37841	1.0304	7.23405	44.8159	1.85485
0.5	Rendering 1	dataset09.01.2023	sieć mobilna B	MobileNet V3 Large	224	2	3	Rotation	650	0	5000	0	115	0	0	115	0	Tak	ExponentialDecay	Adam	1e-05	decay_steps=100000, decay_rate=0.96,	Tak	0.559576	4.94891	28.5149	0.622707	0.954256	6.95871	47.9391	1.7514	0.88623	6.13751	48.136	1.53407	0.429883	3.90112	21.9759	0.378391	0.9294	6.87192	44.4719	1.53766	0.909658	6.44049	44.7576	1.41693
0.5	Rendering 1	dataset09.01.2023	sieć mobilna B	MobileNet V3 Large	224	2	3	Rotation	650	0	2500	0	115	0	0	115	0	Tak	ExponentialDecay	Adam	1e-05	decay_steps=100000, decay_rate=0.96,	Tak	0.702422	5.9036	36.0844	0.962558	0.932952	6.80531	46.9694	1.60028	0.961515	6.99313	45.9545	1.70213	0.523688	4.52646	27.5288	0.541722	1.03134	7.78785	48.9942	1.84948	0.910906	7.03151	44.0587	1.61861
0.5	Rendering 1	dataset09.01.2023	sieć mobilna B	MobileNet V3 Large	224	2	3	Rotation	650	0	0	0	115	0	0	115	0	Tak	ExponentialDecay	Adam	1e-05	decay_steps=100000, decay_rate=0.96,	Tak	0.815322	4.88136	52.5313	1.14844	1.21143	8.30975	56.762	2.69894	1.24098	8.52108	54.2237	2.77856	0.740841	4.64262	48.7465	0.975463	1.30413	9.15382	50.8215	3.17626	1.21375	8.72463	51.2286	2.94113
0.5	Rendering 1	dataset09.01.2023	sieć mobilna B	MobileNet V3 Large	224	2	3	Rotation	650	0	5000	0	115	0	0	115	0	Tak	ExponentialDecay	Adam	0.001	decay_steps=100000, decay_rate=0.96,	Tak	0.295309	2.7432	14.8283	0.190646	0.773148	5.93101	44.4917	1.18129	0.937643	7.64684	41.9747	1.601	0.303701	2.86311	14.8157	0.208113	0.781304	5.6797	58.0386	1.0757	0.883254	6.7087	60.1356	1.45282
0.5	Rendering 1	dataset09.01.2023	sieć mobilna B	MobileNet V3 Large	224	2	3	Rotation	650	0	2500	0	115	0	0	115	0	Tak	ExponentialDecay	Adam	0.001	decay_steps=100000, decay_rate=0.96,	Tak	0.381768	3.3884	19.092	0.363245	0.826225	6.21455	47.3676	1.25883	0.809682	6.22102	44.1385	1.27038	0.373539	3.374	18.7067	0.337323	1.38085	9.4713	60.1387	2.88961	1.27895	8.98108	55.6161	2.64839
0.5	Rendering 1	dataset09.01.2023	sieć mobilna B	MobileNet V3 Large	224	2	3	Rotation	650	0	0	0	115	0	0	115	0	Tak	ExponentialDecay	Adam	0.001	decay_steps=100000, decay_rate=0.96,	Tak	0.366745	2.42013	24.6077	0.233664	1.02063	7.37654	47.973	1.86219	0.994036	7.29837	44.0577	1.73839	0.352382	2.43722	23.1414	0.224302	1.15314	8.43773	46.1016	2.30583	1.1001	8.12557	44.747	2.2104
0.5	Rendering 1	dataset09.01.2023	sieć mobilna B	MobileNet V3 Large	224	1.66667	3	Rotation	650	0	5000	0	115	0	0	115	0	Tak	PiecewiseConstantDecay	RMSprop	1e-05	decay_steps=100000, decay_rate=0.96,	Tak	0.762777	6.4777	39.5397	1.14064	0.977526	7.2198	73.105	1.61392	0.845678	6.17489	61.1321	1.2803	0.768829	6.54906	40.0014	1.1356	0.975027	7.173	68.6908	1.55954	0.869262	6.24675	68.8257	1.2677
0.5	Rendering 1	dataset09.01.2023	sieć mobilna B	MobileNet V3 Large	224	1.66667	3	Rotation	650	0	2500	0	115	0	0	115	0	Tak	PiecewiseConstantDecay	RMSprop	1e-05	decay_steps=100000, decay_rate=0.96,	Tak	0.969473	7.60092	51.5881	1.73323	0.965228	7.02101	65.326	1.72859	0.904168	6.39843	56.8861	1.52289	0.945726	7.47777	50.4144	1.70392	0.940466	6.90184	55.8918	1.64401	0.906928	6.44915	58.8895	1.49157
0.5	Rendering 1	dataset09.01.2023	sieć mobilna B	MobileNet V3 Large	224	1.66667	3	Rotation	650	0	0	0	115	0	0	115	0	Tak	PiecewiseConstantDecay	RMSprop	1e-05	decay_steps=100000, decay_rate=0.96,	Tak	1.29901	7.15602	89.7703	2.66293	1.22153	8.53962	81.2476	2.66462	1.2706	8.59564	97.1	2.57405	1.23995	6.84245	85.3765	2.53867	1.2385	8.67968	83.174	2.58993	1.17697	7.8874	76.7651	2.33106
0.5	Rendering 1	dataset09.01.2023	sieć mobilna B	MobileNet V3 Large	224	1.66667	3	Rotation	650	0	5000	0	115	0	0	115	0	Tak	PiecewiseConstantDecay	RMSprop	1e-05	decay_steps=100000, decay_rate=0.96,	Nie	0.762777	6.4777	39.5397	1.14064	0.977526	7.2198	73.105	1.61392	0.845678	6.17489	61.1321	1.2803	0.768829	6.54906	40.0014	1.1356	0.975027	7.173	68.6908	1.55954	0.869262	6.24675	68.8257	1.2677
0.5	Rendering 1	dataset09.01.2023	sieć mobilna B	MobileNet V3 Large	224	1.66667	3	Rotation	650	0	2500	0	115	0	0	115	0	Tak	PiecewiseConstantDecay	RMSprop	1e-05	decay_steps=100000, decay_rate=0.96,	Nie	0.969473	7.60092	51.5881	1.73323	0.965228	7.02101	65.326	1.72859	0.904168	6.39843	56.8861	1.52289	0.945726	7.47777	50.4144	1.70392	0.940466	6.90184	55.8918	1.64401	0.906928	6.44915	58.8895	1.49157
0.5	Rendering 1	dataset09.01.2023	sieć mobilna B	MobileNet V3 Large	224	1.66667	3	Rotation	650	0	0	0	115	0	0	115	0	Tak	PiecewiseConstantDecay	RMSprop	1e-05	decay_steps=100000, decay_rate=0.96,	Nie	1.29901	7.15602	89.7703	2.66293	1.22153	8.53962	81.2476	2.66462	1.2706	8.59564	97.1	2.57405	1.23995	6.84245	85.3765	2.53867	1.2385	8.67968	83.174	2.58993	1.17697	7.8874	76.7651	2.33106
0.5	Rendering 1	dataset09.01.2023	sieć mobilna B	MobileNet V3 Large	224	1.66667	3	Rotation	650	0	5000	0	115	0	0	115	0	Tak	PiecewiseConstantDecay	RMSprop	0.001	decay_steps=100000, decay_rate=0.96,	Tak	0.296199	2.72016	14.6281	0.183447	0.933953	6.75678	52.8878	1.43557	0.878254	6.34856	54.5588	1.3149	0.281359	2.61589	14.1296	0.169499	0.942813	6.92933	51.7368	1.45163	0.816902	5.6967	50.9142	1.09859
0.5	Rendering 1	dataset09.01.2023	sieć mobilna B	MobileNet V3 Large	224	1.66667	3	Rotation	650	0	2500	0	115	0	0	115	0	Tak	PiecewiseConstantDecay	RMSprop	0.001	decay_steps=100000, decay_rate=0.96,	Tak	0.329942	2.99502	17.3091	0.236835	0.954841	7.10669	52.5227	1.63145	0.894119	6.5486	52.3096	1.36719	0.309289	2.80769	15.9321	0.206164	0.903416	6.80786	46.565	1.42697	0.79712	5.78005	48.7328	1.13083
0.5	Rendering 1	dataset09.01.2023	sieć mobilna B	MobileNet V3 Large	224	1.66667	3	Rotation	650	0	0	0	115	0	0	115	0	Tak	PiecewiseConstantDecay	RMSprop	0.001	decay_steps=100000, decay_rate=0.96,	Tak	0.52382	3.51939	32.9131	0.550507	0.93439	6.92347	42.0769	1.6338	0.948366	6.76839	42.6732	1.60022	0.552185	3.61134	33.9278	0.609252	0.996139	7.31237	43.1404	1.78807	0.921363	6.44338	42.0422	1.53046
0.5	Rendering 1	dataset09.01.2023	sieć mobilna B	MobileNet V3 Large	224	1.66667	3	Rotation	650	0	5000	0	115	0	0	115	0	Tak	PiecewiseConstantDecay	RMSprop	0.001	decay_steps=100000, decay_rate=0.96,	Nie	0.296199	2.72016	14.6281	0.183447	0.933953	6.75678	52.8878	1.43557	0.878254	6.34856	54.5588	1.3149	0.281359	2.61589	14.1296	0.169499	0.942813	6.92933	51.7368	1.45163	0.816902	5.6967	50.9142	1.09859
0.5	Rendering 1	dataset09.01.2023	sieć mobilna B	MobileNet V3 Large	224	1.66667	3	Rotation	650	0	2500	0	115	0	0	115	0	Tak	PiecewiseConstantDecay	RMSprop	0.001	decay_steps=100000, decay_rate=0.96,	Nie	0.329942	2.99502	17.3091	0.236835	0.954841	7.10669	52.5227	1.63145	0.894119	6.5486	52.3096	1.36719	0.309289	2.80769	15.9321	0.206164	0.903416	6.80786	46.565	1.42697	0.79712	5.78005	48.7328	1.13083
0.5	Rendering 1	dataset09.01.2023	sieć mobilna B	MobileNet V3 Large	224	1.66667	3	Rotation	650	0	0	0	115	0	0	115	0	Tak	PiecewiseConstantDecay	RMSprop	0.001	decay_steps=100000, decay_rate=0.96,	Nie	0.52382	3.51939	32.9131	0.550507	0.93439	6.92347	42.0769	1.6338	0.948366	6.76839	42.6732	1.60022	0.552185	3.61134	33.9278	0.609252	0.996139	7.31237	43.1404	1.78807	0.921363	6.44338	42.0422	1.53046
0.5	Rendering 1	dataset09.01.2023	sieć mobilna B	MobileNet V3 Large	224	2	3	Rotation	650	0	5000	0	115	0	0	115	0	Tak	ExponentialDecay	RMSprop	1e-05	decay_steps=100000, decay_rate=0.96,	Tak	0.482169	4.34818	24.9407	0.476712	1.2455	9.1528	156.699	2.25732	1.17441	8.67449	138.945	1.99784	0.389902	3.57704	19.7636	0.323778	0.997911	7.71386	104.404	1.54624	0.948812	7.30916	97.253	1.40695
0.5	Rendering 1	dataset09.01.2023	sieć mobilna B	MobileNet V3 Large	224	2	3	Rotation	650	0	2500	0	115	0	0	115	0	Tak	ExponentialDecay	RMSprop	1e-05	decay_steps=100000, decay_rate=0.96,	Tak	0.598281	5.14678	31.6491	0.709747	0.983101	7.26531	109.044	1.47265	0.932831	7.17952	90.4815	1.29453	0.46524	4.08744	24.5232	0.440122	1.11699	9.2035	112.476	1.97762	1.23484	10.123	138.571	2.33727
0.5	Rendering 1	dataset09.01.2023	sieć mobilna B	MobileNet V3 Large	224	2	3	Rotation	650	0	0	0	115	0	0	115	0	Tak	ExponentialDecay	RMSprop	1e-05	decay_steps=100000, decay_rate=0.96,	Tak	0.804929	5.01685	51.1423	1.15553	0.968578	7.01353	77.9825	1.68256	0.872903	6.46467	61.019	1.35136	0.665739	4.3311	43.0595	0.85272	0.963764	7.34455	59.4237	1.61584	0.946677	6.94266	73.9818	1.48878
0.5	Rendering 1	dataset09.01.2023	sieć mobilna B	MobileNet V3 Large	224	2	3	Rotation	650	0	5000	0	115	0	0	115	0	Tak	ExponentialDecay	RMSprop	0.001	decay_steps=100000, decay_rate=0.96,	Tak	0.312594	2.93838	15.2133	0.217605	0.865078	6.04296	57.7477	1.15804	0.750642	5.1601	49.9695	1.00918	0.256085	2.43756	12.4371	0.144809	0.891223	6.68941	63.7408	1.4158	0.850296	6.15795	67.0104	1.29002
0.5	Rendering 1	dataset09.01.2023	sieć mobilna B	MobileNet V3 Large	224	2	3	Rotation	650	0	2500	0	115	0	0	115	0	Tak	ExponentialDecay	RMSprop	0.001	decay_steps=100000, decay_rate=0.96,	Tak	0.333734	3.01838	17.1247	0.244607	1.06627	7.58356	62.6916	1.70044	1.09266	7.83742	59.0983	1.78933	0.264846	2.44472	13.2282	0.163249	1.13456	8.08951	53.9821	1.88277	1.07006	7.84579	50.5517	1.75832
0.5	Rendering 1	dataset09.01.2023	sieć mobilna B	MobileNet V3 Large	224	2	3	Rotation	650	0	0	0	115	0	0	115	0	Tak	ExponentialDecay	RMSprop	0.001	decay_steps=100000, decay_rate=0.96,	Tak	0.484391	3.21744	31.9174	0.429777	1.72982	10.4979	70.974	4.29083	1.83295	11.0175	73.3424	4.5653	0.393917	2.61292	26.5095	0.288689	1.33791	9.30774	54.8318	2.8099	1.25459	8.87228	52.0724	2.58471
0.5	Rendering 1	dataset09.01.2023	sieć mobilna B	MobileNet V3 Large	224	1.66667	2	Rotation 90° x	650	0	5000	0	115	0	0	115	0	Tak	PiecewiseConstantDecay	Adam	1e-05	decay_steps=100000, decay_rate=0.96,	Tak	0.738242	6.44312	37.7146	1.05979	1.16703	8.66129	55.6074	2.43228	1.09901	8.24899	58.5961	2.29698	0.732705	6.37384	37.8842	1.05911	1.14948	8.65726	55.6694	2.5545	1.04833	7.70091	53.9112	2.02044
0.5	Rendering 1	dataset09.01.2023	sieć mobilna B	MobileNet V3 Large	224	1.66667	2	Rotation 90° x	650	0	2500	0	115	0	0	115	0	Tak	PiecewiseConstantDecay	Adam	1e-05	decay_steps=100000, decay_rate=0.96,	Tak	1.02641	8.12805	56.4382	1.90907	1.56229	10.4981	61.6452	4.15917	1.42557	9.65689	58.8827	3.76514	1.0392	8.21574	56.751	1.9792	1.54376	10.3133	61.6221	4.37108	1.49648	9.84619	59.0039	3.91576
0.5	Rendering 1	dataset09.01.2023	sieć mobilna B	MobileNet V3 Large	224	1.66667	2	Rotation 90° x	650	0	0	0	115	0	0	115	0	Tak	PiecewiseConstantDecay	Adam	1e-05	decay_steps=100000, decay_rate=0.96,	Tak	1.11914	6.34812	73.1541	2.07391	1.51545	10.2566	66.528	3.74204	1.36893	9.54929	58.2673	3.49827	1.12697	6.47531	77.0547	2.08441	1.48908	10.0942	67.3154	3.74263	1.35384	9.25324	59.226	3.31783
0.5	Rendering 1	dataset09.01.2023	sieć mobilna B	MobileNet V3 Large	224	1.66667	2	Rotation 90° x	650	0	5000	0	115	0	0	115	0	Tak	PiecewiseConstantDecay	Adam	1e-05	decay_steps=100000, decay_rate=0.96,	Nie	0.738242	6.44312	37.7146	1.05979	1.16703	8.66129	55.6074	2.43228	1.09901	8.24899	58.5961	2.29698	0.732705	6.37384	37.8842	1.05911	1.14948	8.65726	55.6694	2.5545	1.04833	7.70091	53.9112	2.02044
0.5	Rendering 1	dataset09.01.2023	sieć mobilna B	MobileNet V3 Large	224	1.66667	2	Rotation 90° x	650	0	2500	0	115	0	0	115	0	Tak	PiecewiseConstantDecay	Adam	1e-05	decay_steps=100000, decay_rate=0.96,	Nie	1.02641	8.12805	56.4382	1.90907	1.56229	10.4981	61.6452	4.15917	1.42557	9.65689	58.8827	3.76514	1.0392	8.21574	56.751	1.9792	1.54376	10.3133	61.6221	4.37108	1.49648	9.84619	59.0039	3.91576
0.5	Rendering 1	dataset09.01.2023	sieć mobilna B	MobileNet V3 Large	224	1.66667	2	Rotation 90° x	650	0	0	0	115	0	0	115	0	Tak	PiecewiseConstantDecay	Adam	1e-05	decay_steps=100000, decay_rate=0.96,	Nie	1.11914	6.34812	73.1541	2.07391	1.51545	10.2566	66.528	3.74204	1.36893	9.54929	58.2673	3.49827	1.12697	6.47531	77.0547	2.08441	1.48908	10.0942	67.3154	3.74263	1.35384	9.25324	59.226	3.31783
0.5	Rendering 1	dataset09.01.2023	sieć mobilna B	MobileNet V3 Large	224	1.66667	2	Rotation 90° x	650	0	5000	0	115	0	0	115	0	Tak	PiecewiseConstantDecay	Adam	0.001	decay_steps=100000, decay_rate=0.96,	Tak	0.299496	2.75644	15.4391	0.185299	0.915812	6.82971	71.5854	1.39344	0.796997	5.67509	70.6898	1.06583	0.29405	2.72768	14.8323	0.180542	0.905889	6.77452	68.0234	1.30408	0.817811	5.86878	68.383	1.13416
0.5	Rendering 1	dataset09.01.2023	sieć mobilna B	MobileNet V3 Large	224	1.66667	2	Rotation 90° x	650	0	2500	0	115	0	0	115	0	Tak	PiecewiseConstantDecay	Adam	0.001	decay_steps=100000, decay_rate=0.96,	Tak	0.313921	2.84389	16.3319	0.20465	0.732113	5.91008	45.79	0.991488	0.707033	5.14732	59.3659	0.862846	0.297347	2.70418	15.4246	0.184254	0.724203	5.76558	46.5884	0.958921	0.678015	5.14927	51.7339	0.802614
0.5	Rendering 1	dataset09.01.2023	sieć mobilna B	MobileNet V3 Large	224	1.66667	2	Rotation 90° x	650	0	0	0	115	0	0	115	0	Tak	PiecewiseConstantDecay	Adam	0.001	decay_steps=100000, decay_rate=0.96,	Tak	0.409006	2.71122	25.8237	0.299487	0.927546	7.26931	40.6015	1.72198	0.699003	5.38512	35.4178	1.1292	0.389102	2.60603	25.3422	0.274984	0.804609	6.40679	37.8807	1.23565	0.779451	6.03188	38.9286	1.22525
0.5	Rendering 1	dataset09.01.2023	sieć mobilna B	MobileNet V3 Large	224	1.66667	2	Rotation 90° x	650	0	5000	0	115	0	0	115	0	Tak	PiecewiseConstantDecay	Adam	0.001	decay_steps=100000, decay_rate=0.96,	Nie	0.299496	2.75644	15.4391	0.185299	0.915812	6.82971	71.5854	1.39344	0.796997	5.67509	70.6898	1.06583	0.29405	2.72768	14.8323	0.180542	0.905889	6.77452	68.0234	1.30408	0.817811	5.86878	68.383	1.13416
0.5	Rendering 1	dataset09.01.2023	sieć mobilna B	MobileNet V3 Large	224	1.66667	2	Rotation 90° x	650	0	2500	0	115	0	0	115	0	Tak	PiecewiseConstantDecay	Adam	0.001	decay_steps=100000, decay_rate=0.96,	Nie	0.313921	2.84389	16.3319	0.20465	0.732113	5.91008	45.79	0.991488	0.707033	5.14732	59.3659	0.862846	0.297347	2.70418	15.4246	0.184254	0.724203	5.76558	46.5884	0.958921	0.678015	5.14927	51.7339	0.802614
0.5	Rendering 1	dataset09.01.2023	sieć mobilna B	MobileNet V3 Large	224	1.66667	2	Rotation 90° x	650	0	0	0	115	0	0	115	0	Tak	PiecewiseConstantDecay	Adam	0.001	decay_steps=100000, decay_rate=0.96,	Nie	0.409006	2.71122	25.8237	0.299487	0.927546	7.26931	40.6015	1.72198	0.699003	5.38512	35.4178	1.1292	0.389102	2.60603	25.3422	0.274984	0.804609	6.40679	37.8807	1.23565	0.779451	6.03188	38.9286	1.22525
0.5	Rendering 1	dataset09.01.2023	sieć mobilna B	MobileNet V3 Large	224	2	2	Rotation 90° x	650	0	5000	0	115	0	0	115	0	Tak	ExponentialDecay	Adam	1e-05	decay_steps=100000, decay_rate=0.96,	Tak	0.445209	3.96749	23.7545	0.392184	0.874198	6.47266	55.3369	1.43109	0.803062	5.74659	54.056	1.28717	0.322688	2.93352	16.8902	0.211003	0.8523	6.43247	56.6832	1.28984	0.835503	6.12085	52.6758	1.28518
0.5	Rendering 1	dataset09.01.2023	sieć mobilna B	MobileNet V3 Large	224	2	2	Rotation 90° x	650	0	2500	0	115	0	0	115	0	Tak	ExponentialDecay	Adam	1e-05	decay_steps=100000, decay_rate=0.96,	Tak	0.636477	5.4047	34.1521	0.786596	0.990906	7.23257	53.6082	1.96314	1.1477	8.91763	46.0614	2.52763	0.466714	4.06033	25.0675	0.416156	0.894975	6.28743	54.0661	1.43725	1.01757	7.63266	48.6282	1.93838
0.5	Rendering 1	dataset09.01.2023	sieć mobilna B	MobileNet V3 Large	224	2	2	Rotation 90° x	650	0	0	0	115	0	0	115	0	Tak	ExponentialDecay	Adam	1e-05	decay_steps=100000, decay_rate=0.96,	Tak	0.602208	3.77493	40.8026	0.622186	1.08754	7.7895	49.3485	2.21981	1.29517	9.63344	51.7426	2.85772	0.467246	3.02342	31.439	0.361801	0.935466	6.51848	45.8872	1.51031	1.1181	8.15544	46.9555	2.31939
0.5	Rendering 1	dataset09.01.2023	sieć mobilna B	MobileNet V3 Large	224	2	2	Rotation 90° x	650	0	5000	0	115	0	0	115	0	Tak	ExponentialDecay	Adam	0.001	decay_steps=100000, decay_rate=0.96,	Tak	0.211718	1.985	10.5612	0.0943481	0.491404	3.99975	31.1744	0.531898	0.445614	3.42698	30.7349	0.447592	0.15798	1.50685	7.74257	0.0580204	0.663425	5.38629	35.8835	0.897824	0.612282	4.85053	32.6725	0.789735
0.5	Rendering 1	dataset09.01.2023	sieć mobilna B	MobileNet V3 Large	224	2	2	Rotation 90° x	650	0	2500	0	115	0	0	115	0	Tak	ExponentialDecay	Adam	0.001	decay_steps=100000, decay_rate=0.96,	Tak	0.248796	2.27636	13.0451	0.131581	1.17796	8.381	48.5869	2.49744	1.24235	8.76576	49.9974	2.62855	0.202947	1.87762	10.4584	0.0921066	1.04559	8.03301	41.5208	2.07883	1.02564	7.90824	42.5085	2.06461
0.5	Rendering 1	dataset09.01.2023	sieć mobilna B	MobileNet V3 Large	224	2	2	Rotation 90° x	650	0	0	0	115	0	0	115	0	Tak	ExponentialDecay	Adam	0.001	decay_steps=100000, decay_rate=0.96,	Tak	0.325059	2.20821	20.7366	0.196646	0.86688	6.58103	39.519	1.54863	0.910059	6.90438	40.0994	1.67069	0.288059	1.94989	19.1521	0.147652	1.05094	8.01838	41.5319	2.13658	1.01986	7.83139	40.6171	2.10114
0.5	Rendering 1	dataset09.01.2023	sieć mobilna B	MobileNet V3 Large	224	1.66667	2	Rotation 90° x	650	0	5000	0	115	0	0	115	0	Tak	PiecewiseConstantDecay	RMSprop	1e-05	decay_steps=100000, decay_rate=0.96,	Tak	0.690826	5.95213	36.5879	0.91044	1.07656	8.11446	69.5736	1.86891	0.952488	7.33045	60.4881	1.58366	0.673142	5.81913	35.916	0.862872	1.04532	7.97676	68.417	1.84252	0.922861	6.86795	62.7872	1.47717
0.5	Rendering 1	dataset09.01.2023	sieć mobilna B	MobileNet V3 Large	224	1.66667	2	Rotation 90° x	650	0	2500	0	115	0	0	115	0	Tak	PiecewiseConstantDecay	RMSprop	1e-05	decay_steps=100000, decay_rate=0.96,	Tak	0.847666	6.70159	48.6363	1.29785	1.29344	9.32861	62.6228	2.91725	1.2037	8.70345	59.6507	2.78107	0.850801	6.73614	49.8956	1.29011	1.22487	8.94214	63.9654	2.72896	1.17137	8.22875	57.7871	2.49673
0.5	Rendering 1	dataset09.01.2023	sieć mobilna B	MobileNet V3 Large	224	1.66667	2	Rotation 90° x	650	0	0	0	115	0	0	115	0	Tak	PiecewiseConstantDecay	RMSprop	1e-05	decay_steps=100000, decay_rate=0.96,	Tak	1.02957	5.81546	69.3939	1.70943	1.3685	9.59229	71.001	3.03887	1.26576	9.03281	65.5929	2.86075	0.962985	5.54687	69.4474	1.57244	1.3379	9.34366	72.0353	2.94643	1.30867	8.8903	71.3589	2.82221
0.5	Rendering 1	dataset09.01.2023	sieć mobilna B	MobileNet V3 Large	224	1.66667	2	Rotation 90° x	650	0	5000	0	115	0	0	115	0	Tak	PiecewiseConstantDecay	RMSprop	1e-05	decay_steps=100000, decay_rate=0.96,	Nie	0.690826	5.95213	36.5879	0.91044	1.07656	8.11446	69.5736	1.86891	0.952488	7.33045	60.4881	1.58366	0.673142	5.81913	35.916	0.862872	1.04532	7.97676	68.417	1.84252	0.922861	6.86795	62.7872	1.47717
0.5	Rendering 1	dataset09.01.2023	sieć mobilna B	MobileNet V3 Large	224	1.66667	2	Rotation 90° x	650	0	2500	0	115	0	0	115	0	Tak	PiecewiseConstantDecay	RMSprop	1e-05	decay_steps=100000, decay_rate=0.96,	Nie	0.847666	6.70159	48.6363	1.29785	1.29344	9.32861	62.6228	2.91725	1.2037	8.70345	59.6507	2.78107	0.850801	6.73614	49.8956	1.29011	1.22487	8.94214	63.9654	2.72896	1.17137	8.22875	57.7871	2.49673
0.5	Rendering 1	dataset09.01.2023	sieć mobilna B	MobileNet V3 Large	224	1.66667	2	Rotation 90° x	650	0	0	0	115	0	0	115	0	Tak	PiecewiseConstantDecay	RMSprop	1e-05	decay_steps=100000, decay_rate=0.96,	Nie	1.02957	5.81546	69.3939	1.70943	1.3685	9.59229	71.001	3.03887	1.26576	9.03281	65.5929	2.86075	0.962985	5.54687	69.4474	1.57244	1.3379	9.34366	72.0353	2.94643	1.30867	8.8903	71.3589	2.82221
0.5	Rendering 1	dataset09.01.2023	sieć mobilna B	MobileNet V3 Large	224	1.66667	2	Rotation 90° x	650	0	5000	0	115	0	0	115	0	Tak	PiecewiseConstantDecay	RMSprop	0.001	decay_steps=100000, decay_rate=0.96,	Tak	0.234749	2.19796	11.8222	0.116075	1.07444	8.0541	46.0438	1.78222	0.969098	7.39936	42.9888	1.66524	0.225965	2.13258	11.1595	0.108203	1.0462	7.85337	48.5668	1.73152	0.991051	7.27317	45.2614	1.5496
0.5	Rendering 1	dataset09.01.2023	sieć mobilna B	MobileNet V3 Large	224	1.66667	2	Rotation 90° x	650	0	2500	0	115	0	0	115	0	Tak	PiecewiseConstantDecay	RMSprop	0.001	decay_steps=100000, decay_rate=0.96,	Tak	0.274808	2.48123	14.3257	0.155395	0.889858	7.13145	38.6625	1.4329	0.776618	6.48195	34.3476	1.427	0.25696	2.35996	13.073	0.141005	0.838724	6.83205	38.728	1.42092	0.779391	6.27433	35.4005	1.26241
0.5	Rendering 1	dataset09.01.2023	sieć mobilna B	MobileNet V3 Large	224	1.66667	2	Rotation 90° x	650	0	0	0	115	0	0	115	0	Tak	PiecewiseConstantDecay	RMSprop	0.001	decay_steps=100000, decay_rate=0.96,	Tak	0.380734	2.46567	23.9787	0.247519	0.918267	7.2112	38.6805	1.60515	0.82342	6.65787	35.4951	1.57402	0.322701	2.12708	21.1661	0.181959	0.881251	6.91136	39.5081	1.59663	0.825176	6.42668	35.3826	1.44307
0.5	Rendering 1	dataset09.01.2023	sieć mobilna B	MobileNet V3 Large	224	1.66667	2	Rotation 90° x	650	0	5000	0	115	0	0	115	0	Tak	PiecewiseConstantDecay	RMSprop	0.001	decay_steps=100000, decay_rate=0.96,	Nie	0.234749	2.19796	11.8222	0.116075	1.07444	8.0541	46.0438	1.78222	0.969098	7.39936	42.9888	1.66524	0.225965	2.13258	11.1595	0.108203	1.0462	7.85337	48.5668	1.73152	0.991051	7.27317	45.2614	1.5496
0.5	Rendering 1	dataset09.01.2023	sieć mobilna B	MobileNet V3 Large	224	1.66667	2	Rotation 90° x	650	0	2500	0	115	0	0	115	0	Tak	PiecewiseConstantDecay	RMSprop	0.001	decay_steps=100000, decay_rate=0.96,	Nie	0.274808	2.48123	14.3257	0.155395	0.889858	7.13145	38.6625	1.4329	0.776618	6.48195	34.3476	1.427	0.25696	2.35996	13.073	0.141005	0.838724	6.83205	38.728	1.42092	0.779391	6.27433	35.4005	1.26241
0.5	Rendering 1	dataset09.01.2023	sieć mobilna B	MobileNet V3 Large	224	1.66667	2	Rotation 90° x	650	0	0	0	115	0	0	115	0	Tak	PiecewiseConstantDecay	RMSprop	0.001	decay_steps=100000, decay_rate=0.96,	Nie	0.380734	2.46567	23.9787	0.247519	0.918267	7.2112	38.6805	1.60515	0.82342	6.65787	35.4951	1.57402	0.322701	2.12708	21.1661	0.181959	0.881251	6.91136	39.5081	1.59663	0.825176	6.42668	35.3826	1.44307
0.5	Rendering 1	dataset09.01.2023	sieć mobilna B	MobileNet V3 Large	224	2	2	Rotation 90° x	650	0	5000	0	115	0	0	115	0	Tak	ExponentialDecay	RMSprop	1e-05	decay_steps=100000, decay_rate=0.96,	Tak	0.381336	3.46751	19.9287	0.288592	1.49528	11.037	204.54	3.03079	1.33301	9.34584	177.461	2.40617	0.29621	2.70752	15.5143	0.175198	1.49191	11.4612	196.449	2.946	1.34276	9.66007	185.46	2.47524
0.5	Rendering 1	dataset09.01.2023	sieć mobilna B	MobileNet V3 Large	224	2	2	Rotation 90° x	650	0	2500	0	115	0	0	115	0	Tak	ExponentialDecay	RMSprop	1e-05	decay_steps=100000, decay_rate=0.96,	Tak	0.45805	4.03061	24.5455	0.42683	0.990281	7.1896	120.654	1.58606	0.994685	7.86382	88.2726	1.38007	0.358934	3.23592	18.8248	0.260392	1.35443	9.95014	182.054	2.49532	1.17494	8.74382	138.193	1.88305
0.5	Rendering 1	dataset09.01.2023	sieć mobilna B	MobileNet V3 Large	224	2	2	Rotation 90° x	650	0	0	0	115	0	0	115	0	Tak	ExponentialDecay	RMSprop	1e-05	decay_steps=100000, decay_rate=0.96,	Tak	0.585292	3.75677	41.3137	0.576236	1.15458	8.14608	52.0196	2.43194	1.46966	10.5649	57.3098	3.55843	0.460802	3.07897	30.6535	0.384601	0.978802	6.74706	46.8262	1.71195	1.19168	8.57544	50.0361	2.62128
0.5	Rendering 1	dataset09.01.2023	sieć mobilna B	MobileNet V3 Large	224	2	2	Rotation 90° x	650	0	5000	0	115	0	0	115	0	Tak	ExponentialDecay	RMSprop	0.001	decay_steps=100000, decay_rate=0.96,	Tak	0.236164	2.24658	11.4274	0.123241	0.742692	5.67918	38.0015	1.01954	0.683745	5.10813	38.236	0.931552	0.197	1.89608	9.43362	0.087585	0.764179	5.94878	45.1496	1.05126	0.671629	5.12401	39.1188	0.795403
0.5	Rendering 1	dataset09.01.2023	sieć mobilna B	MobileNet V3 Large	224	2	2	Rotation 90° x	650	0	2500	0	115	0	0	115	0	Tak	ExponentialDecay	RMSprop	0.001	decay_steps=100000, decay_rate=0.96,	Tak	0.262665	2.40894	13.2748	0.149927	0.898754	6.57492	46.7892	1.35421	1.10657	8.41571	47.1719	1.90428	0.205534	1.93533	10.1012	0.102704	0.825988	5.88972	39.0051	1.11771	0.985177	7.34736	44.7177	1.59287
0.5	Rendering 1	dataset09.01.2023	sieć mobilna B	MobileNet V3 Large	224	2	2	Rotation 90° x	650	0	0	0	115	0	0	115	0	Tak	ExponentialDecay	RMSprop	0.001	decay_steps=100000, decay_rate=0.96,	Tak	0.417028	2.77864	26.4093	0.321495	0.610749	4.97366	28.9465	0.862784	0.857693	7.1821	32.9729	1.5204	0.351708	2.33403	22.85	0.214383	0.840282	6.02123	37.8956	1.22514	1.00872	7.55196	42.5483	1.83426
0.5	Rendering 1	dataset09.01.2023	sieć mobilna B	MobileNet V3 Large	224	2	2	Saturation	650	0	5000	0	115	0	0	115	0	Tak	CosineDecay	Adam	1e-05			0.685914	5.89513	35.9747	0.909899	0.983602	7.4318	54.4535	1.76824	0.918866	6.47194	58.932	1.50856	0.667068	5.71232	35.7007	0.841347	1.0054	7.60882	58.9587	2.05385	0.914453	6.51467	52.9858	1.62517
0.5	Rendering 1	dataset09.01.2023	sieć mobilna B	MobileNet V3 Large	224	2	2	Saturation	650	0	2500	0	115	0	0	115	0	Tak	CosineDecay	Adam	1e-05			0.804253	6.50617	45.169	1.21233	0.98525	7.14276	63.0545	1.92538	1.02229	7.01071	66.0482	1.92012	0.801838	6.56237	44.4596	1.19321	1.05894	7.67038	62.6202	2.08416	1.02889	7.17379	59.1393	1.9502
0.5	Rendering 1	dataset09.01.2023	sieć mobilna B	MobileNet V3 Large	224	2	2	Saturation	650	0	0	0	115	0	0	115	0	Tak	CosineDecay	Adam	1e-05			1.08133	6.07894	75.3945	1.90729	1.14641	7.64726	74.2507	2.284	1.15006	7.57504	82.3158	2.32721	1.09462	6.48929	77.6566	1.97635	1.21254	8.20444	74.219	2.42301	1.09302	7.41871	65.6084	1.97127
0.5	Rendering 1	dataset09.01.2023	sieć mobilna B	MobileNet V3 Large	224	2	2	Saturation	650	0	5000	0	115	0	0	115	0	Tak	CosineDecay	Adam	0.001			0.262522	2.44051	13.3502	0.140428	1.01636	7.59674	57.3444	1.95638	0.886609	6.34223	54.8118	1.54482	0.233563	2.16502	11.8887	0.11269	0.998735	7.54794	58.0011	1.96348	0.849323	6.15649	51.1746	1.47583
0.5	Rendering 1	dataset09.01.2023	sieć mobilna B	MobileNet V3 Large	224	2	2	Saturation	650	0	2500	0	115	0	0	115	0	Tak	CosineDecay	Adam	0.001			0.336995	3.04905	17.3478	0.227973	0.958006	7.26651	55.7986	1.61531	0.943606	7.02795	60.8177	1.55385	0.297547	2.68684	15.5965	0.177893	0.890827	6.79293	51.7341	1.44336	0.898088	6.51289	59.6421	1.39132
0.5	Rendering 1	dataset09.01.2023	sieć mobilna B	MobileNet V3 Large	224	2	2	Saturation	650	0	0	0	115	0	0	115	0	Tak	CosineDecay	Adam	0.001			0.328966	2.23433	21.3931	0.204608	1.30866	9.51824	50.4289	2.95201	1.17555	8.80179	45.5057	2.87828	0.317722	2.15193	20.8773	0.183289	1.23171	9.06216	50.6737	2.7326	1.13266	8.29717	45.4816	2.46923
0.5	Rendering 1	dataset09.01.2023	sieć mobilna B	MobileNet V3 Large	224	2	2	Saturation	650	0	5000	0	115	0	0	115	0	Tak	PiecewiseConstantDecay	Adam		decay_steps=100000, decay_rate=0.96,	Tak	0.717191	6.1413	37.4685	0.976326	1.11021	8.0794	61.041	2.15794	1.06247	7.73617	58.8926	2.14288	0.704246	6.05416	37.3107	0.940886	1.18348	8.66431	61.1617	2.53878	1.10962	8.25354	55.0198	2.3664
0.5	Rendering 1	dataset09.01.2023	sieć mobilna B	MobileNet V3 Large	224	2	2	Saturation	650	0	2500	0	115	0	0	115	0	Tak	PiecewiseConstantDecay	Adam		decay_steps=100000, decay_rate=0.96,	Tak	0.799252	6.42457	43.4779	1.18461	1.12969	8.28978	50.2446	2.46645	1.10484	7.95093	51.327	2.42758	0.789964	6.40764	43.2683	1.17757	1.24592	9.07383	54.8706	2.88085	1.11065	8.27746	50.8529	2.42381
0.5	Rendering 1	dataset09.01.2023	sieć mobilna B	MobileNet V3 Large	224	2	2	Saturation	650	0	0	0	115	0	0	115	0	Tak	PiecewiseConstantDecay	Adam		decay_steps=100000, decay_rate=0.96,	Tak	1.05453	6.3644	78.6425	1.71828	1.52905	9.82707	68.227	3.72193	1.45344	9.29469	64.4453	3.67077	1.01747	6.00351	67.3064	1.75622	1.62757	10.5203	68.6497	4.56293	1.56415	10.2605	66.3334	4.25043
0.5	Rendering 1	dataset09.01.2023	sieć mobilna B	MobileNet V3 Large	224	2	2	Saturation	650	0	5000	0	115	0	0	115	0	Tak	PiecewiseConstantDecay	Adam		decay_steps=100000, decay_rate=0.96,	Nie	0.242287	2.25079	12.2543	0.12269	1.13098	8.29914	49.9526	2.2214	1.05078	7.76734	45.2231	2.12957	0.22156	2.07914	11.0974	0.106743	1.16274	8.72501	48.0569	2.54682	1.17322	8.69382	51.3559	2.38288
0.5	Rendering 1	dataset09.01.2023	sieć mobilna B	MobileNet V3 Large	224	2	2	Saturation	650	0	2500	0	115	0	0	115	0	Tak	PiecewiseConstantDecay	Adam		decay_steps=100000, decay_rate=0.96,	Nie	0.298736	2.66972	15.933	0.177992	0.88383	6.47979	57.8263	1.29818	0.940251	7.05741	69.007	1.42218	0.287132	2.57559	15.1777	0.165511	0.880499	6.55411	60.8938	1.31602	0.744509	5.21313	54.4454	0.989917
0.5	Rendering 1	dataset09.01.2023	sieć mobilna B	MobileNet V3 Large	224	2	2	Saturation	650	0	0	0	115	0	0	115	0	Tak	PiecewiseConstantDecay	Adam		decay_steps=100000, decay_rate=0.96,	Nie	0.343525	2.26867	22.5711	0.207685	0.927516	7.25674	41.4509	1.82487	0.866593	6.50193	41.7629	1.62662	0.334275	2.22404	21.7099	0.20327	0.958016	7.69959	44.0536	1.80009	0.935574	7.17335	41.8167	1.77504
0.5	Rendering 1	dataset09.01.2023	sieć mobilna B	MobileNet V3 Large	224	2	2	Saturation	650	0	5000	0	115	0	0	115	0	Nie	PiecewiseConstantDecay	Adam		decay_steps=100000, decay_rate=0.96,	Tak	0.177	1.598	9.505	0.061	0.896	6.376	87.221	1.203	0.977	7.442	88.504	1.432	0.169	1.532	8.989	0.057	0.879	6.412	74.413	1.17	0.892	5.914	104.141	1.155
0.5	Rendering 1	dataset09.01.2023	sieć mobilna B	MobileNet V3 Large	224	2	2	Saturation	650	0	2500	0	115	0	0	115	0	Nie	PiecewiseConstantDecay	Adam		decay_steps=100000, decay_rate=0.96,	Tak	0.222	1.921	12.651	0.095	1.022	7.292	86.615	1.673	1.033	7.949	81.369	1.785	0.227	1.944	12.906	0.097	0.868	6.379	74.475	1.253	0.908	6.217	88.539	1.364
0.5	Rendering 1	dataset09.01.2023	sieć mobilna B	MobileNet V3 Large	224	2	2	Saturation	650	0	0	0	115	0	0	115	0	Nie	PiecewiseConstantDecay	Adam		decay_steps=100000, decay_rate=0.96,	Tak	0.245	1.501	18.312	0.096	1.16	8.059	70.721	2.446	1.254	9.106	77.423	2.549	0.238	1.481	17.859	0.095	1.206	8.238	74.574	2.551	1.098	7.185	90.774	1.965
0.5	Rendering 1	dataset09.01.2023	sieć mobilna B	MobileNet V3 Large	224	2	2	Saturation	650	0	5000	0	115	0	0	115	0	Nie	PiecewiseConstantDecay	Adam		decay_steps=100000, decay_rate=0.96,	Nie	0.049	0.461	2.479	0.005	0.481	3.562	38.502	0.411	0.513	3.995	38.241	0.472	0.038	0.363	1.849	0.003	0.439	3.269	33.679	0.347	0.505	3.391	48.551	0.409
0.5	Rendering 1	dataset09.01.2023	sieć mobilna B	MobileNet V3 Large	224	2	2	Saturation	650	0	2500	0	115	0	0	115	0	Nie	PiecewiseConstantDecay	Adam		decay_steps=100000, decay_rate=0.96,	Nie	0.058	0.53	3.038	0.007	0.575	4.171	50.522	0.573	0.572	4.507	44.037	0.583	0.04	0.357	2.106	0.003	0.563	4.185	49.885	0.562	0.634	4.23	67.094	0.655
0.5	Rendering 1	dataset09.01.2023	sieć mobilna B	MobileNet V3 Large	224	2	2	Saturation	650	0	0	0	115	0	0	115	0	Nie	PiecewiseConstantDecay	Adam		decay_steps=100000, decay_rate=0.96,	Nie	0.088	0.592	6.053	0.015	0.923	7.044	40.14	1.798	1.055	8.187	44.457	2.193	0.066	0.442	4.408	0.007	0.934	7.046	40.889	1.723	0.73	5.271	40.63	1.148
0.5	Rendering 1	dataset09.01.2023	sieć mobilna B	MobileNet V3 Large	224	2	2	Saturation	650	0	5000	0	115	0	0	115	0	Tak	CosineDecay	RMSprop	1e-05			0.53431	4.76978	28.0052	0.557517	0.933607	6.8058	92.6668	1.2971	0.861924	6.04163	91.1244	1.20227	0.526902	4.68925	27.89	0.550336	0.93553	6.74829	101.539	1.43276	0.901341	6.40307	92.7452	1.31754
0.5	Rendering 1	dataset09.01.2023	sieć mobilna B	MobileNet V3 Large	224	2	2	Saturation	650	0	2500	0	115	0	0	115	0	Tak	CosineDecay	RMSprop	1e-05			0.692131	5.75219	39.1861	0.899146	0.99127	7.09658	75.6685	1.50101	0.992941	7.87299	52.2933	1.7039	0.670495	5.50806	37.6977	0.855532	0.923384	6.39894	73.3453	1.29094	0.862883	6.52431	52.3979	1.34815
0.5	Rendering 1	dataset09.01.2023	sieć mobilna B	MobileNet V3 Large	224	2	2	Saturation	650	0	0	0	115	0	0	115	0	Tak	CosineDecay	RMSprop	1e-05			0.965977	5.97298	72.1856	1.45407	1.35265	8.9439	68.1286	2.97486	1.69044	11.4868	71.947	4.42143	0.895913	5.44618	65.3388	1.29314	1.27645	8.10935	71.0597	2.48645	1.52413	10.0605	73.9682	3.71554
0.5	Rendering 1	dataset09.01.2023	sieć mobilna B	MobileNet V3 Large	224	2	2	Saturation	650	0	5000	0	115	0	0	115	0	Tak	CosineDecay	RMSprop	0.001			0.206238	1.95264	10.1523	0.0941401	0.993732	7.46678	44.6594	1.67186	0.849684	6.08881	41.5245	1.26154	0.195079	1.85046	9.65812	0.0806775	0.938358	7.17904	42.9514	1.62845	0.861007	6.13366	41.1139	1.28648
0.5	Rendering 1	dataset09.01.2023	sieć mobilna B	MobileNet V3 Large	224	2	2	Saturation	650	0	2500	0	115	0	0	115	0	Tak	CosineDecay	RMSprop	0.001			0.229049	2.09536	11.7567	0.111899	0.675023	5.38398	31.5369	1.08762	0.635502	4.8655	32.229	0.910706	0.215494	1.99971	10.9966	0.099371	0.686367	5.54611	31.318	1.04341	0.662877	5.1597	33.6387	0.905448
0.5	Rendering 1	dataset09.01.2023	sieć mobilna B	MobileNet V3 Large	224	2	2	Saturation	650	0	0	0	115	0	0	115	0	Tak	CosineDecay	RMSprop	0.001			0.284886	1.8953	18.8129	0.147202	0.877571	6.62758	38.108	1.71856	0.839034	6.13712	38.7836	1.55646	0.287365	1.94193	18.7869	0.150267	0.975179	7.38729	40.1388	1.99439	0.896286	6.63768	39.0235	1.72946
0.5	Rendering 1	dataset09.01.2023	sieć mobilna B	MobileNet V3 Large	224	2	2	Saturation	650	0	5000	0	115	0	0	115	0	Tak	PiecewiseConstantDecay	RMSprop		decay_steps=100000, decay_rate=0.96,	Tak	0.587506	5.21378	30.9506	0.66514	0.988246	7.43715	72.4097	1.48961	0.963544	7.11314	78.358	1.48958	0.584198	5.12904	30.9384	0.640684	0.856418	5.98302	78.6835	1.13652	0.993268	7.45525	73.6939	1.54595
0.5	Rendering 1	dataset09.01.2023	sieć mobilna B	MobileNet V3 Large	224	2	2	Saturation	650	0	2500	0	115	0	0	115	0	Tak	PiecewiseConstantDecay	RMSprop		decay_steps=100000, decay_rate=0.96,	Tak	0.664338	5.54757	37.0373	0.819243	0.873915	6.09121	73.1464	1.23961	0.936738	7.03245	63.958	1.59024	0.671312	5.66085	37.0874	0.848685	0.867312	6.23744	67.4413	1.2909	0.901423	6.51227	68.2451	1.37099
0.5	Rendering 1	dataset09.01.2023	sieć mobilna B	MobileNet V3 Large	224	2	2	Saturation	650	0	0	0	115	0	0	115	0	Tak	PiecewiseConstantDecay	RMSprop		decay_steps=100000, decay_rate=0.96,	Tak	0.761783	4.69522	54.3606	0.950646	1.30804	8.31567	63.841	2.84143	1.21669	7.56495	58.3958	2.43249	0.77871	4.74567	54.9533	0.988085	1.38735	9.26484	64.3092	3.18735	1.45151	9.5194	64.3958	3.37523
0.5	Rendering 1	dataset09.01.2023	sieć mobilna B	MobileNet V3 Large	224	2	2	Saturation	650	0	5000	0	115	0	0	115	0	Tak	PiecewiseConstantDecay	RMSprop		decay_steps=100000, decay_rate=0.96,	Nie	0.217564	2.05644	10.7655	0.100904	0.785936	5.80173	38.0477	1.1407	0.722502	5.2695	34.7305	0.976342	0.203979	1.92499	10.1175	0.0899763	0.880021	6.68227	39.924	1.37814	0.914197	6.86475	40.8428	1.43901
0.5	Rendering 1	dataset09.01.2023	sieć mobilna B	MobileNet V3 Large	224	2	2	Saturation	650	0	2500	0	115	0	0	115	0	Tak	PiecewiseConstantDecay	RMSprop		decay_steps=100000, decay_rate=0.96,	Nie	0.242529	2.24976	12.2123	0.126478	0.829217	6.51169	37.7871	1.18146	0.727375	5.737	34.3882	1.07068	0.221043	2.0204	11.2723	0.103625	0.79394	5.80611	43.3326	1.08091	0.765067	5.98629	35.4441	1.07739
0.5	Rendering 1	dataset09.01.2023	sieć mobilna B	MobileNet V3 Large	224	2	2	Saturation	650	0	0	0	115	0	0	115	0	Tak	PiecewiseConstantDecay	RMSprop		decay_steps=100000, decay_rate=0.96,	Nie	0.298558	2.01671	19.4842	0.159114	1.21107	8.84381	49.1963	2.50459	1.03575	7.67145	43.6266	2.17794	0.266736	1.74373	17.5596	0.120723	1.05079	7.48656	43.7122	2.09056	1.1134	8.16656	46.6732	2.257
0.5	Rendering 1	dataset09.01.2023	sieć mobilna B	MobileNet V3 Large	224	2	2	Saturation	650	0	5000	0	115	0	0	115	0	Nie	PiecewiseConstantDecay	RMSprop		decay_steps=100000, decay_rate=0.96,	Tak	0.25	2.216	13.873	0.119	1.056	7.52	81.428	1.86	1.078	8.042	76.288	2.064	0.242	2.149	13.3	0.114	1.022	7.379	68.278	1.843	0.978	6.52	96.3	1.502
0.5	Rendering 1	dataset09.01.2023	sieć mobilna B	MobileNet V3 Large	224	2	2	Saturation	650	0	2500	0	115	0	0	115	0	Nie	PiecewiseConstantDecay	RMSprop		decay_steps=100000, decay_rate=0.96,	Tak	0.3	2.583	17.434	0.17	0.981	7.136	71.641	1.735	0.998	7.703	63.276	1.885	0.305	2.628	17.42	0.176	1.049	7.661	72.36	1.976	0.896	6.188	76.332	1.371
0.5	Rendering 1	dataset09.01.2023	sieć mobilna B	MobileNet V3 Large	224	2	2	Saturation	650	0	0	0	115	0	0	115	0	Nie	PiecewiseConstantDecay	RMSprop		decay_steps=100000, decay_rate=0.96,	Tak	0.263	1.645	19.348	0.113	1.153	7.932	68.595	2.443	1.255	9.159	64.299	2.988	0.281	1.756	20.39	0.133	1.085	7.565	59.379	2.157	1.062	6.74	75.816	2.288
0.5	Rendering 1	dataset09.01.2023	sieć mobilna B	MobileNet V3 Large	224	2	2	Saturation	650	0	5000	0	115	0	0	115	0	Nie	PiecewiseConstantDecay	RMSprop		decay_steps=100000, decay_rate=0.96,	Nie	0.097	0.888	5.106	0.019	1.122	8.023	49.717	2.577	1.237	9.141	52.486	2.987	0.072	0.668	3.815	0.011	1.174	8.245	51.73	2.622	0.914	6.231	51.949	1.731
0.5	Rendering 1	dataset09.01.2023	sieć mobilna B	MobileNet V3 Large	224	2	2	Saturation	650	0	2500	0	115	0	0	115	0	Nie	PiecewiseConstantDecay	RMSprop		decay_steps=100000, decay_rate=0.96,	Nie	0.128	1.115	7.123	0.032	0.974	7.151	55.76	1.776	1.072	8.225	53.796	2.275	0.099	0.868	5.512	0.02	1.007	7.368	53.426	1.891	0.838	5.742	56.32	1.364
0.5	Rendering 1	dataset09.01.2023	sieć mobilna B	MobileNet V3 Large	224	2	2	Saturation	650	0	0	0	115	0	0	115	0	Nie	PiecewiseConstantDecay	RMSprop		decay_steps=100000, decay_rate=0.96,	Nie	0.132	0.877	9.056	0.03	0.84	6.432	40.471	1.441	0.912	7.253	40.77	1.718	0.113	0.761	7.584	0.025	0.853	6.477	39.841	1.419	0.688	4.954	37.7	1.001
0.5	Rendering 1	dataset09.01.2023	sieć mobilna A	MobileNet V3 Small	224	2	1	Brightness, contrast	650	0	5000	0	115	0	0	115	0	Tak	CosineDecay	Adam	1e-05			0.690347	5.96149	36.1178	0.924615	1.08322	7.20049	55.7547	2.12003	1.2366	8.75707	56.2333	2.66575	0.697243	5.98654	35.955	0.961106	1.1458	7.95013	55.299	2.35425	1.11073	7.58711	54.7994	2.22875
0.5	Rendering 1	dataset09.01.2023	sieć mobilna A	MobileNet V3 Small	224	2	1	Brightness, contrast	650	0	2500	0	115	0	0	115	0	Tak	CosineDecay	Adam	1e-05			0.871948	7.15867	47.3679	1.42761	0.95972	6.52591	60.4284	1.67855	1.04922	7.73738	52.1877	2.06774	0.85975	6.97376	45.357	1.39593	1.11761	7.7439	67.2351	2.09613	1.03509	7.22688	56.6917	1.96771
0.5	Rendering 1	dataset09.01.2023	sieć mobilna A	MobileNet V3 Small	224	2	1	Brightness, contrast	650	0	0	0	115	0	0	115	0	Tak	CosineDecay	Adam	1e-05			1.10918	6.50234	76.2265	1.95782	1.43081	8.49677	65.5959	3.65362	1.61874	10.2872	60.7152	4.61399	1.03472	5.99027	69.01	1.80075	1.6007	9.64248	65.9455	4.28024	1.5375	9.41494	64.3246	4.04561
0.5	Rendering 1	dataset09.01.2023	sieć mobilna A	MobileNet V3 Small	224	2	1	Brightness, contrast	650	0	5000	0	115	0	0	115	0	Tak	CosineDecay	Adam	0.001			0.300553	2.76945	15.4925	0.181185	0.885436	6.22822	47.2329	1.52143	0.993245	7.55312	44.0656	1.91732	0.273258	2.52538	13.9956	0.153589	1.00706	7.26496	49.4879	1.87485	0.996634	7.13007	50.3521	1.77477
0.5	Rendering 1	dataset09.01.2023	sieć mobilna A	MobileNet V3 Small	224	2	1	Brightness, contrast	650	0	2500	0	115	0	0	115	0	Tak	CosineDecay	Adam	0.001			0.303785	2.72494	15.8422	0.192733	0.821991	5.89035	44.9175	1.32936	0.936419	7.18709	43.0882	1.76682	0.29212	2.6369	15.1503	0.183791	0.967361	7.07444	46.337	1.80908	0.967174	6.99703	49.5	1.75703
0.5	Rendering 1	dataset09.01.2023	sieć mobilna A	MobileNet V3 Small	224	2	1	Brightness, contrast	650	0	0	0	115	0	0	115	0	Tak	CosineDecay	Adam	0.001			0.54744	3.54102	34.9037	0.558165	1.13553	8.45776	55.6326	2.45846	0.998147	7.17701	61.4298	1.89187	0.495067	3.22618	32.4225	0.437612	1.28379	8.72475	55.2814	2.9604	1.28416	8.72987	55.4244	2.96737
0.5	Rendering 1	dataset09.01.2023	sieć mobilna A	MobileNet V3 Small	224	2	1	Brightness, contrast	650	0	5000	0	115	0	0	115	0	Tak	PiecewiseConstantDecay	Adam		decay_steps=100000, decay_rate=0.96,	Tak	0.755662	6.43066	39.3871	1.08572	1.3211	9.19966	67.8138	2.84372	1.20156	8.36063	60.0439	2.52476	0.742923	6.36142	38.3236	1.07429	1.23326	8.8983	60.0765	2.63543	1.22558	8.83179	59.9667	2.7409
0.5	Rendering 1	dataset09.01.2023	sieć mobilna A	MobileNet V3 Small	224	2	1	Brightness, contrast	650	0	2500	0	115	0	0	115	0	Tak	PiecewiseConstantDecay	Adam		decay_steps=100000, decay_rate=0.96,	Tak	0.859248	6.99143	44.7273	1.40475	1.23219	8.71687	70.3981	2.55041	1.18417	8.38884	66.0407	2.59046	0.808871	6.58882	42.4916	1.28325	1.24314	9.07169	63.4825	2.80497	1.23163	8.95477	63.0509	2.8022
0.5	Rendering 1	dataset09.01.2023	sieć mobilna A	MobileNet V3 Small	224	2	1	Brightness, contrast	650	0	0	0	115	0	0	115	0	Tak	PiecewiseConstantDecay	Adam		decay_steps=100000, decay_rate=0.96,	Tak	0.922061	5.56383	61.0524	1.47975	1.54248	10.2412	61.6426	3.80934	1.44377	9.56652	58.3062	3.60738	0.940608	5.59892	61.3208	1.49109	1.47522	10.1552	58.9991	3.79638	1.49116	10.0728	60.6609	3.79813
0.5	Rendering 1	dataset09.01.2023	sieć mobilna A	MobileNet V3 Small	224	2	1	Brightness, contrast	650	0	5000	0	115	0	0	115	0	Tak	PiecewiseConstantDecay	Adam		decay_steps=100000, decay_rate=0.96,	Nie	0.268294	2.47938	13.782	0.151837	0.8949	6.93001	41.3653	1.52132	0.829245	6.43189	41.1221	1.47591	0.256634	2.38788	13.0949	0.13853	0.92143	7.17659	45.3952	1.6405	0.952217	7.35783	44.6072	1.74665
0.5	Rendering 1	dataset09.01.2023	sieć mobilna A	MobileNet V3 Small	224	2	1	Brightness, contrast	650	0	2500	0	115	0	0	115	0	Tak	PiecewiseConstantDecay	Adam		decay_steps=100000, decay_rate=0.96,	Nie	0.305967	2.77299	15.9462	0.191109	0.934932	7.00824	61.1303	1.5319	0.856187	6.51423	55.8833	1.36644	0.303289	2.75746	15.6885	0.192913	0.907805	7.11911	47.8001	1.55814	0.833116	6.60327	44.3616	1.40734
0.5	Rendering 1	dataset09.01.2023	sieć mobilna A	MobileNet V3 Small	224	2	1	Brightness, contrast	650	0	0	0	115	0	0	115	0	Tak	PiecewiseConstantDecay	Adam		decay_steps=100000, decay_rate=0.96,	Nie	0.403345	2.70139	25.7413	0.305703	0.902778	6.82636	50.5705	1.71497	1.00257	7.84891	45.9412	1.99711	0.378005	2.50884	25.0197	0.26072	0.991084	7.32382	45.4664	1.94291	1.03179	7.47579	47.2385	1.88879
0.5	Rendering 1	dataset09.01.2023	sieć mobilna A	MobileNet V3 Small	224	2	1	Brightness, contrast	650	0	5000	0	115	0	0	115	0	Nie	PiecewiseConstantDecay	Adam		decay_steps=100000, decay_rate=0.96,	Tak	0.099	0.65	7.003	0.018	1.313	9.008	51.749	3.307	1.451	10.223	52.949	3.876	0.056	0.378	3.823	0.005	1.282	8.849	50.869	2.986	1.048	6.969	47.526	2.197
0.5	Rendering 1	dataset09.01.2023	sieć mobilna A	MobileNet V3 Small	224	2	1	Brightness, contrast	650	0	2500	0	115	0	0	115	0	Nie	PiecewiseConstantDecay	Adam		decay_steps=100000, decay_rate=0.96,	Tak	0.259	2.37	13.73	0.137	0.985	6.96	76.929	1.692	1.07	7.908	81.38	2.014	0.255	2.311	13.547	0.135	0.921	6.652	69.809	1.441	0.962	6.234	93.099	1.632
0.5	Rendering 1	dataset09.01.2023	sieć mobilna A	MobileNet V3 Small	224	2	1	Brightness, contrast	650	0	0	0	115	0	0	115	0	Nie	PiecewiseConstantDecay	Adam		decay_steps=100000, decay_rate=0.96,	Tak	0.358	3.215	18.843	0.276	1.052	7.471	102.564	1.754	1.001	7.559	84.683	1.655	0.347	3.135	18.04	0.261	1.013	7.235	90.447	1.654	0.965	6.396	109.865	1.555
0.5	Rendering 1	dataset09.01.2023	sieć mobilna A	MobileNet V3 Small	224	2	1	Brightness, contrast	650	0	5000	0	115	0	0	115	0	Nie	PiecewiseConstantDecay	Adam		decay_steps=100000, decay_rate=0.96,	Nie	0.367	3.21	19.785	0.278	1.119	7.848	77.269	2.143	1.17	8.668	76.552	2.268	0.354	3.126	19.233	0.26	1.079	7.897	73.063	2.014	1.077	7.253	95.194	2.002
0.5	Rendering 1	dataset09.01.2023	sieć mobilna A	MobileNet V3 Small	224	2	1	Brightness, contrast	650	0	2500	0	115	0	0	115	0	Nie	PiecewiseConstantDecay	Adam		decay_steps=100000, decay_rate=0.96,	Nie	0.412	2.696	27.882	0.324	1.267	8.085	63.688	2.633	1.361	9.196	66.611	3.11	0.342	2.287	22.071	0.236	1.298	8.443	73.791	2.537	1.117	6.782	76.824	2.09
0.5	Rendering 1	dataset09.01.2023	sieć mobilna A	MobileNet V3 Small	224	2	1	Brightness, contrast	650	0	0	0	115	0	0	115	0	Nie	PiecewiseConstantDecay	Adam		decay_steps=100000, decay_rate=0.96,	Nie	0.112	1.022	5.947	0.026	1.109	7.839	70.411	2.195	1.215	8.979	64.692	2.563	0.087	0.813	4.502	0.017	1.081	7.635	65.82	2.006	0.994	6.528	74.216	1.75
0.5	Rendering 1	dataset09.01.2023	sieć mobilna A	MobileNet V3 Small	224	2	1	Brightness, contrast	650	0	5000	0	115	0	0	115	0	Tak	CosineDecay	RMSprop	1e-05			0.612647	5.31315	32.5214	0.722607	0.946349	6.45354	79.2478	1.53871	0.991165	7.41073	68.632	1.77258	0.608266	5.33109	32.0618	0.717957	1.02306	7.18701	82.7727	1.69362	1.03656	7.20665	87.4684	1.73406
0.5	Rendering 1	dataset09.01.2023	sieć mobilna A	MobileNet V3 Small	224	2	1	Brightness, contrast	650	0	2500	0	115	0	0	115	0	Tak	CosineDecay	RMSprop	1e-05			0.755581	6.10316	41.7854	1.05973	0.9742	6.67265	76.2176	1.53371	1.06259	7.83889	68.3008	1.87504	0.748454	6.07503	41.87	1.03155	1.01284	7.16676	73.0675	1.73331	1.05809	7.41798	75.5003	1.91279
0.5	Rendering 1	dataset09.01.2023	sieć mobilna A	MobileNet V3 Small	224	2	1	Brightness, contrast	650	0	0	0	115	0	0	115	0	Tak	CosineDecay	RMSprop	1e-05			0.877787	5.20358	61.6641	1.25766	1.44675	8.72901	66.0932	3.35428	1.60726	10.3267	60.4541	4.39819	0.863065	5.22861	61.2685	1.23772	1.55381	9.63584	65.6588	3.84216	1.5586	9.4907	68.0121	3.77938
0.5	Rendering 1	dataset09.01.2023	sieć mobilna A	MobileNet V3 Small	224	2	1	Brightness, contrast	650	0	5000	0	115	0	0	115	0	Tak	CosineDecay	RMSprop	0.001			0.216251	2.04642	10.7158	0.0987504	0.647332	4.80563	34.6148	0.834588	0.73791	5.86733	35.5732	1.05082	0.200075	1.89529	9.86568	0.0862434	0.77306	5.86304	38.2622	1.13266	0.731574	5.56333	36.5453	1.05977
0.5	Rendering 1	dataset09.01.2023	sieć mobilna A	MobileNet V3 Small	224	2	1	Brightness, contrast	650	0	2500	0	115	0	0	115	0	Tak	CosineDecay	RMSprop	0.001			0.244003	2.2286	12.5209	0.125805	0.842069	5.92766	42.0802	1.28642	0.981776	7.36481	43.29	1.74789	0.219582	2.009	11.1596	0.107867	0.998464	7.11855	45.3735	1.7699	0.983394	6.93066	46.4113	1.65276
0.5	Rendering 1	dataset09.01.2023	sieć mobilna A	MobileNet V3 Small	224	2	1	Brightness, contrast	650	0	0	0	115	0	0	115	0	Tak	CosineDecay	RMSprop	0.001			0.296146	1.97499	19.2795	0.155679	0.806896	5.79807	46.8662	1.28386	0.946661	7.31418	43.4525	1.90382	0.264062	1.74645	17.5816	0.122164	1.11518	7.89231	46.6883	2.44136	1.09384	7.71614	44.7526	2.39487
0.5	Rendering 1	dataset09.01.2023	sieć mobilna A	MobileNet V3 Small	224	2	1	Brightness, contrast	650	0	5000	0	115	0	0	115	0	Tak	PiecewiseConstantDecay	RMSprop		decay_steps=100000, decay_rate=0.96,	Tak	0.632738	5.49055	33.4017	0.7833	1.05389	7.58813	77.1699	1.87964	1.01365	7.36773	68.4376	1.88327	0.628091	5.43715	33.4619	0.763725	1.04097	7.76547	69.4252	1.92592	1.03301	7.69124	63.9707	1.93595
0.5	Rendering 1	dataset09.01.2023	sieć mobilna A	MobileNet V3 Small	224	2	1	Brightness, contrast	650	0	2500	0	115	0	0	115	0	Tak	PiecewiseConstantDecay	RMSprop		decay_steps=100000, decay_rate=0.96,	Tak	0.721991	5.95263	39.5984	0.972314	1.04257	7.46339	86.7099	1.83963	1.09082	7.89816	83.3962	2.01195	0.705789	5.84638	37.648	0.941272	1.06695	7.93457	78.4224	2.00366	1.08115	8.01857	78.4067	1.95967
0.5	Rendering 1	dataset09.01.2023	sieć mobilna A	MobileNet V3 Small	224	2	1	Brightness, contrast	650	0	0	0	115	0	0	115	0	Tak	PiecewiseConstantDecay	RMSprop		decay_steps=100000, decay_rate=0.96,	Tak	0.913899	5.70775	64.3267	1.40752	1.55524	10.1279	62.3016	4.01573	1.51679	9.71635	61.525	3.82399	0.863034	5.31962	60.4393	1.26681	1.72573	11.0043	64.7963	4.80597	1.70232	10.8804	62.6273	4.7298
0.5	Rendering 1	dataset09.01.2023	sieć mobilna A	MobileNet V3 Small	224	2	1	Brightness, contrast	650	0	5000	0	115	0	0	115	0	Tak	PiecewiseConstantDecay	RMSprop		decay_steps=100000, decay_rate=0.96,	Nie	0.212819	2.01824	10.4858	0.0979008	0.713692	5.53682	44.1743	0.953251	0.714717	5.53894	43.3483	0.976951	0.199201	1.885	9.86813	0.0866965	0.830753	6.4716	46.6685	1.24641	0.828623	6.43079	47.8981	1.24514
0.5	Rendering 1	dataset09.01.2023	sieć mobilna A	MobileNet V3 Small	224	2	1	Brightness, contrast	650	0	2500	0	115	0	0	115	0	Tak	PiecewiseConstantDecay	RMSprop		decay_steps=100000, decay_rate=0.96,	Nie	0.237538	2.18674	12.1277	0.119103	0.843227	6.43297	40.6077	1.25886	0.840637	6.30248	40.9399	1.30056	0.221826	2.03044	11.4714	0.102177	0.865379	6.55447	43.3399	1.31991	0.914585	6.85683	46.2164	1.41418
0.5	Rendering 1	dataset09.01.2023	sieć mobilna A	MobileNet V3 Small	224	2	1	Brightness, contrast	650	0	0	0	115	0	0	115	0	Tak	PiecewiseConstantDecay	RMSprop		decay_steps=100000, decay_rate=0.96,	Nie	0.338335	2.26245	22.1806	0.202808	1.34717	9.23145	52.9196	3.3459	1.47545	10.4818	54.2749	3.70234	0.312913	2.107	20.2849	0.17301	1.36519	9.34938	52.4048	3.42528	1.47335	9.90966	56.8416	3.56537
0.5	Rendering 1	dataset09.01.2023	sieć mobilna A	MobileNet V3 Small	224	2	1	Brightness, contrast	650	0	5000	0	115	0	0	115	0	Nie	PiecewiseConstantDecay	RMSprop		decay_steps=100000, decay_rate=0.96,	Tak	0.2	1.784	10.945	0.081	0.93	6.658	78.535	1.498	1.009	7.626	75.02	1.808	0.198	1.782	10.57	0.081	0.854	6.21	71.685	1.265	0.913	5.957	105.393	1.512
0.5	Rendering 1	dataset09.01.2023	sieć mobilna A	MobileNet V3 Small	224	2	1	Brightness, contrast	650	0	2500	0	115	0	0	115	0	Nie	PiecewiseConstantDecay	RMSprop		decay_steps=100000, decay_rate=0.96,	Tak	0.257	2.234	14.287	0.131	1.045	7.382	99.983	1.827	1.072	8.053	87.976	1.93	0.253	2.203	14.163	0.122	0.982	7.087	79.92	1.614	0.956	6.397	97.53	1.526
0.5	Rendering 1	dataset09.01.2023	sieć mobilna A	MobileNet V3 Small	224	2	1	Brightness, contrast	650	0	0	0	115	0	0	115	0	Nie	PiecewiseConstantDecay	RMSprop		decay_steps=100000, decay_rate=0.96,	Tak	0.242	1.58	16.883	0.1	1.205	8.291	61.717	2.68	1.331	9.404	60.401	3.085	0.236	1.529	16.575	0.094	1.248	8.391	64.942	2.6	1.086	6.865	72.489	2.086
0.5	Rendering 1	dataset09.01.2023	sieć mobilna A	MobileNet V3 Small	224	2	1	Brightness, contrast	650	0	5000	0	115	0	0	115	0	Nie	PiecewiseConstantDecay	RMSprop		decay_steps=100000, decay_rate=0.96,	Nie	0.052	0.492	2.61	0.006	0.675	5.085	60.149	0.859	0.795	6.158	69.972	1.08	0.039	0.363	1.965	0.003	0.652	4.943	55.882	0.801	0.655	4.517	68.161	0.812
0.5	Rendering 1	dataset09.01.2023	sieć mobilna A	MobileNet V3 Small	224	2	1	Brightness, contrast	650	0	2500	0	115	0	0	115	0	Nie	PiecewiseConstantDecay	RMSprop		decay_steps=100000, decay_rate=0.96,	Nie	0.059	0.533	3.152	0.008	0.863	6.24	81.103	1.207	0.914	7.047	75.667	1.342	0.042	0.374	2.212	0.004	0.756	5.727	59.446	1.027	0.705	4.857	68.605	0.878
0.5	Rendering 1	dataset09.01.2023	sieć mobilna A	MobileNet V3 Small	224	2	1	Brightness, contrast	650	0	0	0	115	0	0	115	0	Nie	PiecewiseConstantDecay	RMSprop		decay_steps=100000, decay_rate=0.96,	Nie	0.106	0.714	7.233	0.019	1.17	8.301	55.887	2.669	1.293	9.448	55.157	3.19	0.074	0.514	4.871	0.01	1.141	8.133	49.417	2.462	0.959	6.448	52.97	1.825
0.5	Rendering 1	dataset09.01.2023	sieć mobilna A	MobileNet V3 Small	224	2	4	Brightness, contrast, hue, saturation	650	0	5000	0	115	0	0	115	0	Tak	CosineDecay	Adam	1e-05			0.753971	6.41215	38.82	1.07354	1.27002	8.97932	60.9829	3.0154	1.11036	7.45521	58.357	2.18753	0.742576	6.35524	38.2779	1.05874	1.24156	8.74105	65.3689	2.81062	1.08077	7.31667	59.7983	2.14346
0.5	Rendering 1	dataset09.01.2023	sieć mobilna A	MobileNet V3 Small	224	2	4	Brightness, contrast, hue, saturation	650	0	2500	0	115	0	0	115	0	Tak	CosineDecay	Adam	1e-05			0.906541	7.26431	48.2421	1.50357	1.19395	8.27711	66.3029	2.58447	1.36946	10.1432	61.7085	3.17249	0.908687	7.28632	48.4341	1.53482	1.10992	7.46833	63.3407	2.06733	1.2644	8.89189	63.4611	2.79908
0.5	Rendering 1	dataset09.01.2023	sieć mobilna A	MobileNet V3 Small	224	2	4	Brightness, contrast, hue, saturation	650	0	0	0	115	0	0	115	0	Tak	CosineDecay	Adam	1e-05			0.955042	5.58696	62.61	1.53926	1.18575	8.21113	61.6982	2.60466	1.3834	10.144	56.7073	3.37235	0.987953	5.83235	68.7469	1.63473	1.0802	7.26636	66.5569	1.96608	1.2403	8.7673	58.4608	2.93596
0.5	Rendering 1	dataset09.01.2023	sieć mobilna A	MobileNet V3 Small	224	2	4	Brightness, contrast, hue, saturation	650	0	5000	0	115	0	0	115	0	Tak	CosineDecay	Adam	0.001			0.294924	2.75357	14.6895	0.181959	0.984498	7.43919	45.2374	1.89092	0.790691	5.71387	44.505	1.20967	0.265404	2.48317	13.4525	0.150803	0.948882	7.26068	45.2341	1.8978	0.816835	5.92729	42.4614	1.38824
0.5	Rendering 1	dataset09.01.2023	sieć mobilna A	MobileNet V3 Small	224	2	4	Brightness, contrast, hue, saturation	650	0	2500	0	115	0	0	115	0	Tak	CosineDecay	Adam	0.001			0.29164	2.6081	15.3602	0.179434	0.832195	6.29957	43.1575	1.36559	0.976381	7.83516	41.5418	1.73743	0.279199	2.48009	14.8665	0.157464	0.826279	5.83813	44.3652	1.15681	0.88722	6.84557	40.5868	1.52193
0.5	Rendering 1	dataset09.01.2023	sieć mobilna A	MobileNet V3 Small	224	2	4	Brightness, contrast, hue, saturation	650	0	0	0	115	0	0	115	0	Tak	CosineDecay	Adam	0.001			0.448393	2.94083	28.7412	0.349142	0.905238	6.76352	50.6762	1.52832	1.097	8.63997	50.22	2.10137	0.398563	2.70532	26.2892	0.287043	0.991606	6.84615	50.0062	1.66951	1.10302	8.17812	46.7227	2.37346
0.5	Rendering 1	dataset09.01.2023	sieć mobilna A	MobileNet V3 Small	224	2	4	Brightness, contrast, hue, saturation	650	0	5000	0	115	0	0	115	0	Tak	PiecewiseConstantDecay	Adam		decay_steps=100000, decay_rate=0.96,	Tak	0.782734	6.6392	40.5772	1.16093	1.34274	9.68197	64.4997	3.22634	1.27439	8.80773	62.26	2.89453	0.754378	6.43281	39.3346	1.07366	1.13718	7.63869	61.4408	2.31328	1.27009	8.99073	61.9168	2.96756
0.5	Rendering 1	dataset09.01.2023	sieć mobilna A	MobileNet V3 Small	224	2	4	Brightness, contrast, hue, saturation	650	0	2500	0	115	0	0	115	0	Tak	PiecewiseConstantDecay	Adam		decay_steps=100000, decay_rate=0.96,	Tak	0.954872	7.63793	51.0706	1.68856	1.42476	10.026	56.6502	3.75832	1.36285	9.08876	58.1616	3.25383	0.940976	7.4636	50.7802	1.62021	1.28659	8.26294	60.365	3.0062	1.46844	9.88073	63.0849	3.6757
0.5	Rendering 1	dataset09.01.2023	sieć mobilna A	MobileNet V3 Small	224	2	4	Brightness, contrast, hue, saturation	650	0	0	0	115	0	0	115	0	Tak	PiecewiseConstantDecay	Adam		decay_steps=100000, decay_rate=0.96,	Tak	1.06599	6.1115	68.1448	1.85847	1.80438	11.5061	68.8042	5.30844	1.69816	10.4706	69.5314	4.79786	1.17944	6.79196	77.3272	2.25224	1.57788	9.309	68.0675	4.01877	1.73874	10.9043	74.0174	4.83272
0.5	Rendering 1	dataset09.01.2023	sieć mobilna A	MobileNet V3 Small	224	2	4	Brightness, contrast, hue, saturation	650	0	5000	0	115	0	0	115	0	Tak	PiecewiseConstantDecay	Adam		decay_steps=100000, decay_rate=0.96,	Nie	0.266018	2.46892	13.5496	0.15062	1.3367	9.73766	52.8545	3.12601	1.24563	8.74698	52.8651	2.73766	0.241446	2.28546	12.0666	0.125658	1.21284	8.10919	52.9446	2.49898	1.36768	9.6582	54.6364	3.2708
0.5	Rendering 1	dataset09.01.2023	sieć mobilna A	MobileNet V3 Small	224	2	4	Brightness, contrast, hue, saturation	650	0	2500	0	115	0	0	115	0	Tak	PiecewiseConstantDecay	Adam		decay_steps=100000, decay_rate=0.96,	Nie	0.345136	3.06689	18.2258	0.235755	1.27338	9.43695	55.5481	3.04659	1.13756	8.21403	52.2876	2.56054	0.336016	3.02559	17.385	0.233329	1.04433	7.20569	51.303	2.0639	1.22273	8.93082	51.9853	2.90503
0.5	Rendering 1	dataset09.01.2023	sieć mobilna A	MobileNet V3 Small	224	2	4	Brightness, contrast, hue, saturation	650	0	0	0	115	0	0	115	0	Tak	PiecewiseConstantDecay	Adam		decay_steps=100000, decay_rate=0.96,	Nie	0.446215	2.94934	28.9792	0.382468	0.876568	6.76165	58.2453	1.20661	0.813284	6.1145	55.1873	1.13913	0.449917	2.98182	28.1283	0.373576	0.857001	6.07233	42.3067	1.35379	0.980352	7.4515	42.2465	1.88717
0.5	Rendering 1	dataset09.01.2023	sieć mobilna A	MobileNet V3 Small	224	2	4	Brightness, contrast, hue, saturation	650	0	5000	0	115	0	0	115	0	Nie	PiecewiseConstantDecay	Adam		decay_steps=100000, decay_rate=0.96,	Tak	0.335	2.939	18.456	0.23	1.051	7.529	103.639	1.618	1.021	7.748	83.059	1.644	0.333	2.88	18.6	0.221	0.888	6.467	76.12	1.377	0.932	6.163	102.98	1.471
0.5	Rendering 1	dataset09.01.2023	sieć mobilna A	MobileNet V3 Small	224	2	4	Brightness, contrast, hue, saturation	650	0	2500	0	115	0	0	115	0	Nie	PiecewiseConstantDecay	Adam		decay_steps=100000, decay_rate=0.96,	Tak	0.286	1.846	20.103	0.145	1.131	7.735	63.969	2.296	1.201	8.765	58.67	2.516	0.28	1.804	20.673	0.134	1.097	7.492	57.605	2.016	0.961	6.188	65.422	1.65
0.5	Rendering 1	dataset09.01.2023	sieć mobilna A	MobileNet V3 Small	224	2	4	Brightness, contrast, hue, saturation	650	0	0	0	115	0	0	115	0	Nie	PiecewiseConstantDecay	Adam		decay_steps=100000, decay_rate=0.96,	Tak	0.06	0.569	3.06	0.008	0.573	4.446	40.74	0.646	0.653	5.301	44.194	0.826	0.05	0.477	2.533	0.006	0.579	4.483	42.294	0.666	0.523	3.755	44.329	0.538
0.5	Rendering 1	dataset09.01.2023	sieć mobilna A	MobileNet V3 Small	224	2	4	Brightness, contrast, hue, saturation	650	0	5000	0	115	0	0	115	0	Nie	PiecewiseConstantDecay	Adam		decay_steps=100000, decay_rate=0.96,	Nie	0.071	0.663	3.684	0.012	0.749	5.453	75.141	0.997	0.837	6.472	78.801	1.199	0.06	0.574	3.01	0.009	0.685	5.103	62.893	0.864	0.607	4.305	61.714	0.764
0.5	Rendering 1	dataset09.01.2023	sieć mobilna A	MobileNet V3 Small	224	2	4	Brightness, contrast, hue, saturation	650	0	2500	0	115	0	0	115	0	Nie	PiecewiseConstantDecay	Adam		decay_steps=100000, decay_rate=0.96,	Nie	0.118	0.806	8.076	0.025	1.137	8.119	50.911	2.501	1.244	9.207	51.29	2.952	0.073	0.499	4.847	0.011	1.227	8.505	52.061	2.568	1.01	6.682	48.997	1.989
0.5	Rendering 1	dataset09.01.2023	sieć mobilna A	MobileNet V3 Small	224	2	4	Brightness, contrast, hue, saturation	650	0	0	0	115	0	0	115	0	Nie	PiecewiseConstantDecay	Adam		decay_steps=100000, decay_rate=0.96,	Nie	0.367	3.33	19.053	0.286	1.009	7.132	72.388	1.802	1.037	7.808	65.042	1.997	0.368	3.349	19.241	0.28	0.929	6.79	56.093	1.631	0.922	6.167	79.939	1.486
0.5	Rendering 1	dataset09.01.2023	sieć mobilna A	MobileNet V3 Small	224	2	4	Brightness, contrast, hue, saturation	650	0	5000	0	115	0	0	115	0	Tak	CosineDecay	RMSprop	1e-05			0.647042	5.68655	33.4719	0.824906	1.08828	7.94255	66.98	2.24317	0.95977	6.62413	65.3833	1.6601	0.615215	5.36733	32.354	0.738808	1.08583	7.97205	67.9995	2.33545	0.904506	6.31134	60.8189	1.68085
0.5	Rendering 1	dataset09.01.2023	sieć mobilna A	MobileNet V3 Small	224	2	4	Brightness, contrast, hue, saturation	650	0	2500	0	115	0	0	115	0	Tak	CosineDecay	RMSprop	1e-05			0.75414	6.22647	40.9779	1.06477	1.02062	7.42351	65.8968	1.95418	1.1675	8.99744	60.3263	2.43051	0.743728	6.20255	40.3915	1.04546	0.970926	6.64439	62.8304	1.68932	1.05688	7.8644	57.3632	2.21628
0.5	Rendering 1	dataset09.01.2023	sieć mobilna A	MobileNet V3 Small	224	2	4	Brightness, contrast, hue, saturation	650	0	0	0	115	0	0	115	0	Tak	CosineDecay	RMSprop	1e-05			0.881382	5.20057	60.0399	1.30066	1.39119	9.2044	60.5394	3.39026	1.70917	11.6002	64.5474	4.61361	0.919425	5.35437	63.9398	1.36745	1.37155	8.62322	66.5399	3.08957	1.52945	10.0286	68.4764	3.92937
0.5	Rendering 1	dataset09.01.2023	sieć mobilna A	MobileNet V3 Small	224	2	4	Brightness, contrast, hue, saturation	650	0	5000	0	115	0	0	115	0	Tak	CosineDecay	RMSprop	0.001			0.218436	2.07198	10.8039	0.102337	0.698686	5.49302	39.2624	0.901151	0.527833	3.85484	33.3377	0.51945	0.206345	1.96826	10.1257	0.0915195	0.714238	5.44289	42.1198	0.884735	0.590769	4.42675	32.9024	0.678302
0.5	Rendering 1	dataset09.01.2023	sieć mobilna A	MobileNet V3 Small	224	2	4	Brightness, contrast, hue, saturation	650	0	2500	0	115	0	0	115	0	Tak	CosineDecay	RMSprop	0.001			0.229915	2.10077	11.929	0.112401	0.686469	5.35331	37.4059	0.964358	0.8462	6.94771	38.1947	1.39987	0.212596	1.93723	11.0397	0.0959047	0.623755	4.50556	34.7987	0.692836	0.735182	5.74467	37.9028	1.08374
0.5	Rendering 1	dataset09.01.2023	sieć mobilna A	MobileNet V3 Small	224	2	4	Brightness, contrast, hue, saturation	650	0	0	0	115	0	0	115	0	Tak	CosineDecay	RMSprop	0.001			0.294221	1.93797	19.6249	0.159526	0.81326	6.21057	48.0002	1.30897	0.991708	7.99624	47.8997	1.82034	0.294307	1.93435	19.5392	0.148983	0.944041	6.59369	49.7834	1.53244	1.06631	7.98538	49.8871	2.18367
0.5	Rendering 1	dataset09.01.2023	sieć mobilna A	MobileNet V3 Small	224	2	4	Brightness, contrast, hue, saturation	650	0	5000	0	115	0	0	115	0	Tak	PiecewiseConstantDecay	RMSprop		decay_steps=100000, decay_rate=0.96,	Tak	0.648139	5.62953	34.6744	0.812943	1.18634	8.84859	67.535	2.55153	1.08254	7.84757	61.9637	2.25697	0.639177	5.55555	33.9133	0.785997	1.00501	6.86171	65.9524	1.88407	1.12631	8.24206	59.4175	2.33921
0.5	Rendering 1	dataset09.01.2023	sieć mobilna A	MobileNet V3 Small	224	2	4	Brightness, contrast, hue, saturation	650	0	2500	0	115	0	0	115	0	Tak	PiecewiseConstantDecay	RMSprop		decay_steps=100000, decay_rate=0.96,	Tak	0.807492	6.66263	43.9578	1.21511	1.27133	9.30266	68.6858	2.945	1.14424	8.13389	62.102	2.47791	0.777062	6.53056	41.7398	1.13332	1.13908	7.55934	68.6732	2.41567	1.2981	9.18448	67.5044	2.98292
0.5	Rendering 1	dataset09.01.2023	sieć mobilna A	MobileNet V3 Small	224	2	4	Brightness, contrast, hue, saturation	650	0	0	0	115	0	0	115	0	Tak	PiecewiseConstantDecay	RMSprop		decay_steps=100000, decay_rate=0.96,	Tak	0.875519	5.20448	59.7641	1.2947	1.62951	10.9001	63.2405	4.33053	1.6278	10.2571	66.0992	4.32071	0.891773	5.48236	59.1865	1.30589	1.45241	8.98123	64.2984	3.39374	1.59934	10.5201	67.7197	4.18824
0.5	Rendering 1	dataset09.01.2023	sieć mobilna A	MobileNet V3 Small	224	2	4	Brightness, contrast, hue, saturation	650	0	5000	0	115	0	0	115	0	Tak	PiecewiseConstantDecay	RMSprop		decay_steps=100000, decay_rate=0.96,	Nie	0.215121	2.03866	10.699	0.100953	0.629809	5.02432	46.5676	0.661529	0.603376	4.78416	42.9751	0.602894	0.199829	1.88512	9.91239	0.0852188	0.53139	3.93834	39.3867	0.513821	0.611338	4.85032	44.1991	0.678857
0.5	Rendering 1	dataset09.01.2023	sieć mobilna A	MobileNet V3 Small	224	2	4	Brightness, contrast, hue, saturation	650	0	2500	0	115	0	0	115	0	Tak	PiecewiseConstantDecay	RMSprop		decay_steps=100000, decay_rate=0.96,	Nie	0.242158	2.20505	12.6293	0.12186	0.775289	6.30046	42.0984	1.14668	0.67111	5.39254	36.1151	0.966161	0.228346	2.09987	11.5872	0.110603	0.614313	4.62831	34.7054	0.784189	0.75745	6.06152	40.1463	1.14305
0.5	Rendering 1	dataset09.01.2023	sieć mobilna A	MobileNet V3 Small	224	2	4	Brightness, contrast, hue, saturation	650	0	0	0	115	0	0	115	0	Tak	PiecewiseConstantDecay	RMSprop		decay_steps=100000, decay_rate=0.96,	Nie	0.287506	1.92756	19.2391	0.149463	1.08141	8.45832	44.0542	2.38927	0.989443	7.50794	43.1095	2.0478	0.274913	1.83932	18.4134	0.133869	1.02195	7.1888	44.6236	2.01142	1.21018	8.90312	47.4239	2.82947
0.5	Rendering 1	dataset09.01.2023	sieć mobilna A	MobileNet V3 Small	224	2	4	Brightness, contrast, hue, saturation	650	0	5000	0	115	0	0	115	0	Nie	PiecewiseConstantDecay	RMSprop		decay_steps=100000, decay_rate=0.96,	Tak	0.318	2.086	21.432	0.186	1.139	7.713	58.662	2.437	1.278	9.087	58.07	2.815	0.306	2.056	20.939	0.173	1.188	8.037	55.221	2.449	1.147	7.118	69.48	2.366
0.5	Rendering 1	dataset09.01.2023	sieć mobilna A	MobileNet V3 Small	224	2	4	Brightness, contrast, hue, saturation	650	0	2500	0	115	0	0	115	0	Nie	PiecewiseConstantDecay	RMSprop		decay_steps=100000, decay_rate=0.96,	Tak	0.404	2.614	29.539	0.285	1.257	8.52	80.591	2.515	1.263	8.992	67.086	2.564	0.384	2.505	27.24	0.262	1.244	8.289	69.518	2.512	1.163	7.356	83.839	2.325
0.5	Rendering 1	dataset09.01.2023	sieć mobilna A	MobileNet V3 Small	224	2	4	Brightness, contrast, hue, saturation	650	0	0	0	115	0	0	115	0	Nie	PiecewiseConstantDecay	RMSprop		decay_steps=100000, decay_rate=0.96,	Tak	0.097	0.913	4.99	0.021	0.971	7.128	48.621	2.004	1.114	8.466	48.96	2.5	0.075	0.707	3.8	0.013	0.966	7.081	49.791	1.872	0.816	5.588	53.766	1.402
0.5	Rendering 1	dataset09.01.2023	sieć mobilna A	MobileNet V3 Small	224	2	4	Brightness, contrast, hue, saturation	650	0	5000	0	115	0	0	115	0	Nie	PiecewiseConstantDecay	RMSprop		decay_steps=100000, decay_rate=0.96,	Nie	0.152	1.373	8.135	0.047	1.005	7.307	56.246	1.891	1.034	7.98	50.198	2.104	0.126	1.154	6.673	0.034	0.963	7.017	53.618	1.73	0.874	5.936	60.001	1.381
0.5	Rendering 1	dataset09.01.2023	sieć mobilna A	MobileNet V3 Small	224	2	4	Brightness, contrast, hue, saturation	650	0	2500	0	115	0	0	115	0	Nie	PiecewiseConstantDecay	RMSprop		decay_steps=100000, decay_rate=0.96,	Nie	0.157	1.049	10.498	0.045	1.145	8.157	50.248	2.523	1.293	9.391	53.809	2.982	0.156	1.069	10.166	0.044	1.107	7.82	50.278	2.209	0.96	6.405	51.313	1.727
0.5	Rendering 1	dataset09.01.2023	sieć mobilna A	MobileNet V3 Small	224	2	4	Brightness, contrast, hue, saturation	650	0	0	0	115	0	0	115	0	Nie	PiecewiseConstantDecay	RMSprop		decay_steps=100000, decay_rate=0.96,	Nie	0.25	2.291	13.01	0.128	0.892	6.46	76.155	1.347	0.979	7.394	77.994	1.667	0.235	2.146	12.276	0.113	0.827	5.988	64.915	1.221	0.842	5.552	87.25	1.248
0.5	Rendering 1	dataset09.01.2023	sieć mobilna A	MobileNet V3 Small	224	1.66667	1	Flip	650	0	5000	0	115	0	0	115	0	Tak	PiecewiseConstantDecay	Adam	1e-05	decay_steps=100000, decay_rate=0.96,	Tak	0.781456	6.60829	40.7868	1.18086	1.20729	8.91063	57.699	2.65419	1.06949	7.5441	53.1646	2.16402	0.776193	6.56067	40.3819	1.15095	1.24291	9.00085	55.4263	2.82746	1.1741	8.29974	56.6942	2.48485
0.5	Rendering 1	dataset09.01.2023	sieć mobilna A	MobileNet V3 Small	224	1.66667	1	Flip	650	0	2500	0	115	0	0	115	0	Tak	PiecewiseConstantDecay	Adam	1e-05	decay_steps=100000, decay_rate=0.96,	Tak	1.01182	7.90978	53.9372	1.84889	1.34529	9.72685	64.5506	3.10951	1.17322	8.1313	59.4059	2.57953	1.04078	8.23773	55.8831	1.94298	1.31588	9.42032	56.5713	3.06855	1.27764	8.77958	64.1005	2.66455
0.5	Rendering 1	dataset09.01.2023	sieć mobilna A	MobileNet V3 Small	224	1.66667	1	Flip	650	0	0	0	115	0	0	115	0	Tak	PiecewiseConstantDecay	Adam	1e-05	decay_steps=100000, decay_rate=0.96,	Tak	1.11014	6.51494	75.9144	2.05759	1.46229	10.2023	60.2978	3.73329	1.32837	8.66225	60.0458	3.187	1.16499	6.76385	83.6369	2.20658	1.45656	9.90619	60.506	3.8252	1.44569	9.44125	64.1135	3.47512
0.5	Rendering 1	dataset09.01.2023	sieć mobilna A	MobileNet V3 Small	224	1.66667	1	Flip	650	0	5000	0	115	0	0	115	0	Tak	PiecewiseConstantDecay	Adam	1e-05	decay_steps=100000, decay_rate=0.96,	Nie	0.781456	6.60829	40.7868	1.18086	1.20729	8.91063	57.699	2.65419	1.06949	7.5441	53.1646	2.16402	0.776193	6.56067	40.3819	1.15095	1.24291	9.00085	55.4263	2.82746	1.1741	8.29974	56.6942	2.48485
0.5	Rendering 1	dataset09.01.2023	sieć mobilna A	MobileNet V3 Small	224	1.66667	1	Flip	650	0	2500	0	115	0	0	115	0	Tak	PiecewiseConstantDecay	Adam	1e-05	decay_steps=100000, decay_rate=0.96,	Nie	1.01182	7.90978	53.9372	1.84889	1.34529	9.72685	64.5506	3.10951	1.17322	8.1313	59.4059	2.57953	1.04078	8.23773	55.8831	1.94298	1.31588	9.42032	56.5713	3.06855	1.27764	8.77958	64.1005	2.66455
0.5	Rendering 1	dataset09.01.2023	sieć mobilna A	MobileNet V3 Small	224	1.66667	1	Flip	650	0	0	0	115	0	0	115	0	Tak	PiecewiseConstantDecay	Adam	1e-05	decay_steps=100000, decay_rate=0.96,	Nie	1.11014	6.51494	75.9144	2.05759	1.46229	10.2023	60.2978	3.73329	1.32837	8.66225	60.0458	3.187	1.16499	6.76385	83.6369	2.20658	1.45656	9.90619	60.506	3.8252	1.44569	9.44125	64.1135	3.47512
0.5	Rendering 1	dataset09.01.2023	sieć mobilna A	MobileNet V3 Small	224	1.66667	1	Flip	650	0	5000	0	115	0	0	115	0	Tak	PiecewiseConstantDecay	Adam	0.001	decay_steps=100000, decay_rate=0.96,	Tak	0.335778	3.11383	16.9403	0.234771	1.29331	9.34732	51.6474	2.92562	1.11169	7.63634	48.8475	2.22155	0.311033	2.88986	15.7682	0.198006	1.15595	8.56208	47.0763	2.49002	1.07157	7.78788	46.8174	2.12253
0.5	Rendering 1	dataset09.01.2023	sieć mobilna A	MobileNet V3 Small	224	1.66667	1	Flip	650	0	2500	0	115	0	0	115	0	Tak	PiecewiseConstantDecay	Adam	0.001	decay_steps=100000, decay_rate=0.96,	Tak	0.422618	3.73625	21.6594	0.384258	0.880622	6.57004	82.46	1.11648	0.869723	5.924	94.2433	1.07018	0.408184	3.63158	20.965	0.358562	0.896536	7.07176	43.531	1.56189	0.841326	6.40432	47.3577	1.30492
0.5	Rendering 1	dataset09.01.2023	sieć mobilna A	MobileNet V3 Small	224	1.66667	1	Flip	650	0	0	0	115	0	0	115	0	Tak	PiecewiseConstantDecay	Adam	0.001	decay_steps=100000, decay_rate=0.96,	Tak	0.731615	4.65619	44.2355	1.03881	1.24912	9.12613	103.552	2.27216	1.24245	8.483	123.272	2.23304	0.715472	4.52813	42.9673	1.03196	1.26801	9.28042	72.5909	2.66808	1.23267	8.69124	84.2382	2.40176
0.5	Rendering 1	dataset09.01.2023	sieć mobilna A	MobileNet V3 Small	224	1.66667	1	Flip	650	0	5000	0	115	0	0	115	0	Tak	PiecewiseConstantDecay	Adam	0.001	decay_steps=100000, decay_rate=0.96,	Nie	0.335778	3.11383	16.9403	0.234771	1.29331	9.34732	51.6474	2.92562	1.11169	7.63634	48.8475	2.22155	0.311033	2.88986	15.7682	0.198006	1.15595	8.56208	47.0763	2.49002	1.07157	7.78788	46.8174	2.12253
0.5	Rendering 1	dataset09.01.2023	sieć mobilna A	MobileNet V3 Small	224	1.66667	1	Flip	650	0	2500	0	115	0	0	115	0	Tak	PiecewiseConstantDecay	Adam	0.001	decay_steps=100000, decay_rate=0.96,	Nie	0.422618	3.73625	21.6594	0.384258	0.880622	6.57004	82.46	1.11648	0.869723	5.924	94.2433	1.07018	0.408184	3.63158	20.965	0.358562	0.896536	7.07176	43.531	1.56189	0.841326	6.40432	47.3577	1.30492
0.5	Rendering 1	dataset09.01.2023	sieć mobilna A	MobileNet V3 Small	224	1.66667	1	Flip	650	0	0	0	115	0	0	115	0	Tak	PiecewiseConstantDecay	Adam	0.001	decay_steps=100000, decay_rate=0.96,	Nie	0.731615	4.65619	44.2355	1.03881	1.24912	9.12613	103.552	2.27216	1.24245	8.483	123.272	2.23304	0.715472	4.52813	42.9673	1.03196	1.26801	9.28042	72.5909	2.66808	1.23267	8.69124	84.2382	2.40176
0.5	Rendering 1	dataset09.01.2023	sieć mobilna A	MobileNet V3 Small	224	2	1	Flip	650	0	5000	0	115	0	0	115	0	Tak	ExponentialDecay	Adam	1e-05	decay_steps=100000, decay_rate=0.96,	Tak	0.507167	4.56908	26.1934	0.519157	1.03326	7.48545	50.0101	2.03959	1.02504	7.47881	47.3664	1.92307	0.367413	3.35045	19.0604	0.267122	0.994982	7.52893	50.845	1.86871	0.989618	7.53017	46.0246	1.97801
0.5	Rendering 1	dataset09.01.2023	sieć mobilna A	MobileNet V3 Small	224	2	1	Flip	650	0	2500	0	115	0	0	115	0	Tak	ExponentialDecay	Adam	1e-05	decay_steps=100000, decay_rate=0.96,	Tak	0.625549	5.40802	33.0052	0.764049	0.910038	6.6455	54.3573	1.49818	0.884771	6.67127	45.5574	1.59748	0.462002	4.10048	24.0831	0.428418	0.854692	6.6185	51.3392	1.42638	0.860332	6.6611	49.6042	1.4525
0.5	Rendering 1	dataset09.01.2023	sieć mobilna A	MobileNet V3 Small	224	2	1	Flip	650	0	0	0	115	0	0	115	0	Tak	ExponentialDecay	Adam	1e-05	decay_steps=100000, decay_rate=0.96,	Tak	0.763435	4.65498	49.2724	0.979898	1.07374	7.58846	51.3303	2.17892	1.10912	7.92856	48.4552	2.30499	0.616925	3.88842	40.1579	0.64328	1.25607	8.8879	54.9238	2.76307	1.23874	8.79654	54.9293	2.75394
0.5	Rendering 1	dataset09.01.2023	sieć mobilna A	MobileNet V3 Small	224	2	1	Flip	650	0	5000	0	115	0	0	115	0	Tak	ExponentialDecay	Adam	0.001	decay_steps=100000, decay_rate=0.96,	Tak	0.232022	2.16851	11.6933	0.115444	1.03772	7.41967	46.4916	1.8728	1.06548	7.63736	46.1647	1.97757	0.187296	1.74098	9.54868	0.0780114	0.894416	6.83311	49.5183	1.39153	0.851336	6.52619	46.2166	1.31704
0.5	Rendering 1	dataset09.01.2023	sieć mobilna A	MobileNet V3 Small	224	2	1	Flip	650	0	2500	0	115	0	0	115	0	Tak	ExponentialDecay	Adam	0.001	decay_steps=100000, decay_rate=0.96,	Tak	0.281104	2.64973	13.9122	0.168489	0.701846	5.41453	35.8625	0.984397	0.743094	5.71764	36.9034	1.08576	0.200707	1.87955	10.0554	0.0886609	1.07916	8.06936	47.176	1.95338	1.06554	7.90044	47.8148	1.91727
0.5	Rendering 1	dataset09.01.2023	sieć mobilna A	MobileNet V3 Small	224	2	1	Flip	650	0	0	0	115	0	0	115	0	Tak	ExponentialDecay	Adam	0.001	decay_steps=100000, decay_rate=0.96,	Tak	0.370244	2.52674	24.2964	0.249841	0.917619	6.81442	53.0855	1.59222	0.896623	6.81972	47.3664	1.6208	0.333475	2.28793	21.5022	0.211966	1.08546	8.23631	45.2527	2.25405	1.09639	8.23246	46.6728	2.34111
0.5	Rendering 1	dataset09.01.2023	sieć mobilna A	MobileNet V3 Small	224	1.66667	1	Flip	650	0	5000	0	115	0	0	115	0	Tak	PiecewiseConstantDecay	RMSprop	1e-05	decay_steps=100000, decay_rate=0.96,	Tak	0.548513	4.88311	28.8055	0.591243	1.04856	7.57507	55.8294	2.09634	1.08109	7.99765	52.8752	2.1446	0.543349	4.83178	28.2744	0.591099	0.92401	6.6005	50.9797	1.64963	1.08325	8.01083	53.1753	2.20402
0.5	Rendering 1	dataset09.01.2023	sieć mobilna A	MobileNet V3 Small	224	1.66667	1	Flip	650	0	2500	0	115	0	0	115	0	Tak	PiecewiseConstantDecay	RMSprop	1e-05	decay_steps=100000, decay_rate=0.96,	Tak	0.548513	4.88311	28.8055	0.591243	1.04856	7.57507	55.8294	2.09634	1.08109	7.99765	52.8752	2.1446	0.543349	4.83178	28.2744	0.591099	0.92401	6.6005	50.9797	1.64963	1.08325	8.01083	53.1753	2.20402
0.5	Rendering 1	dataset09.01.2023	sieć mobilna A	MobileNet V3 Small	224	1.66667	1	Flip	650	0	0	0	115	0	0	115	0	Tak	PiecewiseConstantDecay	RMSprop	1e-05	decay_steps=100000, decay_rate=0.96,	Tak	1.08552	6.32091	76.9703	1.8963	1.54877	10.441	64.0477	3.79667	1.4159	8.95759	68.8993	3.149	1.12497	6.47609	75.8896	2.02118	1.5526	10.2826	61.3969	3.77623	1.51051	9.74451	65.9189	3.44646
0.5	Rendering 1	dataset09.01.2023	sieć mobilna A	MobileNet V3 Small	224	1.66667	1	Flip	650	0	5000	0	115	0	0	115	0	Tak	PiecewiseConstantDecay	RMSprop	1e-05	decay_steps=100000, decay_rate=0.96,	Nie	0.802561	6.71242	43.1903	1.20679	1.08298	8.35708	57.93	2.39779	1.02068	7.35392	65.2447	2.01757	0.809152	6.77282	43.1149	1.24731	1.161	8.73914	57.8678	2.61523	1.07566	7.86967	63.942	2.23744
0.5	Rendering 1	dataset09.01.2023	sieć mobilna A	MobileNet V3 Small	224	1.66667	1	Flip	650	0	2500	0	115	0	0	115	0	Tak	PiecewiseConstantDecay	RMSprop	1e-05	decay_steps=100000, decay_rate=0.96,	Nie	0.802561	6.71242	43.1903	1.20679	1.08298	8.35708	57.93	2.39779	1.02068	7.35392	65.2447	2.01757	0.809152	6.77282	43.1149	1.24731	1.161	8.73914	57.8678	2.61523	1.07566	7.86967	63.942	2.23744
0.5	Rendering 1	dataset09.01.2023	sieć mobilna A	MobileNet V3 Small	224	1.66667	1	Flip	650	0	0	0	115	0	0	115	0	Tak	PiecewiseConstantDecay	RMSprop	1e-05	decay_steps=100000, decay_rate=0.96,	Nie	1.08552	6.32091	76.9703	1.8963	1.54877	10.441	64.0477	3.79667	1.4159	8.95759	68.8993	3.149	1.12497	6.47609	75.8896	2.02118	1.5526	10.2826	61.3969	3.77623	1.51051	9.74451	65.9189	3.44646
0.5	Rendering 1	dataset09.01.2023	sieć mobilna A	MobileNet V3 Small	224	1.66667	1	Flip	650	0	5000	0	115	0	0	115	0	Tak	PiecewiseConstantDecay	RMSprop	0.001	decay_steps=100000, decay_rate=0.96,	Tak	0.229505	2.17291	11.3404	0.11482	0.791245	6.23601	36.4839	1.19178	0.682011	5.04102	38.2325	0.856693	0.220316	2.08309	10.8757	0.106243	0.830083	6.31698	40.6193	1.17362	0.760462	5.68136	38.0103	1.02902
0.5	Rendering 1	dataset09.01.2023	sieć mobilna A	MobileNet V3 Small	224	1.66667	1	Flip	650	0	2500	0	115	0	0	115	0	Tak	PiecewiseConstantDecay	RMSprop	0.001	decay_steps=100000, decay_rate=0.96,	Tak	0.256049	2.33277	13.4012	0.136488	0.706221	5.73514	33.9703	0.990116	0.637716	4.87169	38.2047	0.796545	0.240424	2.17503	12.6223	0.119359	0.881191	6.78357	42.1303	1.33863	0.802535	6.04602	39.2502	1.14516
0.5	Rendering 1	dataset09.01.2023	sieć mobilna A	MobileNet V3 Small	224	1.66667	1	Flip	650	0	0	0	115	0	0	115	0	Tak	PiecewiseConstantDecay	RMSprop	0.001	decay_steps=100000, decay_rate=0.96,	Tak	0.312108	2.07036	20.6784	0.172281	0.978396	7.56793	60.8238	1.63583	0.844974	6.13357	62.9301	1.23245	0.31773	2.12831	20.5015	0.182166	0.939882	7.45158	44.9042	1.81708	0.861814	6.66063	45.3569	1.52386
0.5	Rendering 1	dataset09.01.2023	sieć mobilna A	MobileNet V3 Small	224	1.66667	1	Flip	650	0	5000	0	115	0	0	115	0	Tak	PiecewiseConstantDecay	RMSprop	0.001	decay_steps=100000, decay_rate=0.96,	Nie	0.229505	2.17291	11.3404	0.11482	0.791245	6.23601	36.4839	1.19178	0.682011	5.04102	38.2325	0.856693	0.220316	2.08309	10.8757	0.106243	0.830083	6.31698	40.6193	1.17362	0.760462	5.68136	38.0103	1.02902
0.5	Rendering 1	dataset09.01.2023	sieć mobilna A	MobileNet V3 Small	224	1.66667	1	Flip	650	0	2500	0	115	0	0	115	0	Tak	PiecewiseConstantDecay	RMSprop	0.001	decay_steps=100000, decay_rate=0.96,	Nie	0.256049	2.33277	13.4012	0.136488	0.706221	5.73514	33.9703	0.990116	0.637716	4.87169	38.2047	0.796545	0.240424	2.17503	12.6223	0.119359	0.881191	6.78357	42.1303	1.33863	0.802535	6.04602	39.2502	1.14516
0.5	Rendering 1	dataset09.01.2023	sieć mobilna A	MobileNet V3 Small	224	1.66667	1	Flip	650	0	0	0	115	0	0	115	0	Tak	PiecewiseConstantDecay	RMSprop	0.001	decay_steps=100000, decay_rate=0.96,	Nie	0.312108	2.07036	20.6784	0.172281	0.978396	7.56793	60.8238	1.63583	0.844974	6.13357	62.9301	1.23245	0.31773	2.12831	20.5015	0.182166	0.939882	7.45158	44.9042	1.81708	0.861814	6.66063	45.3569	1.52386
0.5	Rendering 1	dataset09.01.2023	sieć mobilna A	MobileNet V3 Small	224	2	1	Flip	650	0	5000	0	115	0	0	115	0	Tak	ExponentialDecay	RMSprop	1e-05	decay_steps=100000, decay_rate=0.96,	Tak	0.445442	4.02404	23.1535	0.403137	0.808162	5.66431	62.6162	1.19464	0.855841	6.51488	56.0884	1.40004	0.346787	3.20346	17.742	0.240597	0.834105	6.05119	62.6478	1.14476	0.806793	5.69687	59.2218	1.15237
0.5	Rendering 1	dataset09.01.2023	sieć mobilna A	MobileNet V3 Small	224	2	1	Flip	650	0	2500	0	115	0	0	115	0	Tak	ExponentialDecay	RMSprop	1e-05	decay_steps=100000, decay_rate=0.96,	Tak	0.490279	4.25318	26.5822	0.498878	0.84425	6.13943	73.0771	1.20482	0.849174	6.24738	70.1957	1.19033	0.380883	3.3669	20.218	0.297071	0.925269	7.00797	73.3001	1.41549	0.861366	6.51409	65.076	1.3396
0.5	Rendering 1	dataset09.01.2023	sieć mobilna A	MobileNet V3 Small	224	2	1	Flip	650	0	0	0	115	0	0	115	0	Tak	ExponentialDecay	RMSprop	1e-05	decay_steps=100000, decay_rate=0.96,	Tak	0.658402	4.14066	44.6799	0.747399	1.15077	8.0749	52.5958	2.37711	1.12293	7.97478	50.6314	2.18431	0.532097	3.44492	36.2091	0.497985	1.20213	8.69027	51.6627	2.68886	1.17994	8.54363	50.9706	2.61556
0.5	Rendering 1	dataset09.01.2023	sieć mobilna A	MobileNet V3 Small	224	2	1	Flip	650	0	5000	0	115	0	0	115	0	Tak	ExponentialDecay	RMSprop	0.001	decay_steps=100000, decay_rate=0.96,	Tak	0.258995	2.47203	12.438	0.151141	0.712471	5.17482	51.6771	0.868091	0.6727	5.21569	44.3187	0.882626	0.217657	2.0798	10.6486	0.108721	0.759386	5.9664	56.7607	1.00752	0.68379	5.38447	49.1412	0.847472
0.5	Rendering 1	dataset09.01.2023	sieć mobilna A	MobileNet V3 Small	224	2	1	Flip	650	0	2500	0	115	0	0	115	0	Tak	ExponentialDecay	RMSprop	0.001	decay_steps=100000, decay_rate=0.96,	Tak	0.275309	2.50417	14.1537	0.161834	1.01886	7.39984	71.569	1.71771	0.92901	7.08975	49.7024	1.62307	0.20206	1.85992	10.2499	0.0871674	1.33298	9.28467	56.3909	2.74736	1.28625	8.95945	56.2905	2.58263
0.5	Rendering 1	dataset09.01.2023	sieć mobilna A	MobileNet V3 Small	224	2	1	Flip	650	0	0	0	115	0	0	115	0	Tak	ExponentialDecay	RMSprop	0.001	decay_steps=100000, decay_rate=0.96,	Tak	0.563973	3.66493	36.1052	0.518131	1.20368	10.547	90.0297	3.03694	1.02569	8.6538	68.1145	2.20732	0.319603	2.19386	20.3171	0.220117	0.876043	7.98618	71.2426	1.41575	0.909657	8.77543	78.0096	1.86466
0.5	Rendering 1	dataset09.01.2023	sieć mobilna A	MobileNet V3 Small	224	1.66667	4	Flip, rotation	650	0	5000	0	115	0	0	115	0	Tak	PiecewiseConstantDecay	Adam	1e-05	decay_steps=100000, decay_rate=0.96,	Tak	1.16546	9.22698	54.1726	2.5968	2.09395	11.7874	76.8989	6.68373	2.09544	11.3742	77.9448	6.43258	1.08735	8.75986	52.1587	2.26338	2.32654	12.571	83.1449	7.65613	2.19768	11.4789	81.0737	6.8582
0.5	Rendering 1	dataset09.01.2023	sieć mobilna A	MobileNet V3 Small	224	1.66667	4	Flip, rotation	650	0	2500	0	115	0	0	115	0	Tak	PiecewiseConstantDecay	Adam	1e-05	decay_steps=100000, decay_rate=0.96,	Tak	1.35642	10.0129	66.9521	3.32293	1.55874	10.1856	62.8087	4.27444	1.55564	9.75201	68.2129	3.92665	1.27607	9.54729	63.6622	2.9867	1.90636	11.4767	71.3415	5.71828	1.80001	10.4111	71.0075	5.04008
0.5	Rendering 1	dataset09.01.2023	sieć mobilna A	MobileNet V3 Small	224	1.66667	4	Flip, rotation	650	0	0	0	115	0	0	115	0	Tak	PiecewiseConstantDecay	Adam	1e-05	decay_steps=100000, decay_rate=0.96,	Tak	1.34329	7.17017	85.613	2.82974	1.68424	10.3143	67.1077	5.15421	1.80326	10.3565	74.6419	5.24807	1.38193	7.6005	98.2735	3.00046	1.84347	11.0552	75.5464	5.51807	1.65706	9.63433	69.8193	4.61954
0.5	Rendering 1	dataset09.01.2023	sieć mobilna A	MobileNet V3 Small	224	1.66667	4	Flip, rotation	650	0	5000	0	115	0	0	115	0	Tak	PiecewiseConstantDecay	Adam	1e-05	decay_steps=100000, decay_rate=0.96,	Nie	1.16546	9.22698	54.1726	2.5968	2.09395	11.7874	76.8989	6.68373	2.09544	11.3742	77.9448	6.43258	1.08735	8.75986	52.1587	2.26338	2.32654	12.571	83.1449	7.65613	2.19768	11.4789	81.0737	6.8582
0.5	Rendering 1	dataset09.01.2023	sieć mobilna A	MobileNet V3 Small	224	1.66667	4	Flip, rotation	650	0	2500	0	115	0	0	115	0	Tak	PiecewiseConstantDecay	Adam	1e-05	decay_steps=100000, decay_rate=0.96,	Nie	1.35642	10.0129	66.9521	3.32293	1.55874	10.1856	62.8087	4.27444	1.55564	9.75201	68.2129	3.92665	1.27607	9.54729	63.6622	2.9867	1.90636	11.4767	71.3415	5.71828	1.80001	10.4111	71.0075	5.04008
0.5	Rendering 1	dataset09.01.2023	sieć mobilna A	MobileNet V3 Small	224	1.66667	4	Flip, rotation	650	0	0	0	115	0	0	115	0	Tak	PiecewiseConstantDecay	Adam	1e-05	decay_steps=100000, decay_rate=0.96,	Nie	1.34329	7.17017	85.613	2.82974	1.68424	10.3143	67.1077	5.15421	1.80326	10.3565	74.6419	5.24807	1.38193	7.6005	98.2735	3.00046	1.84347	11.0552	75.5464	5.51807	1.65706	9.63433	69.8193	4.61954
0.5	Rendering 1	dataset09.01.2023	sieć mobilna A	MobileNet V3 Small	224	1.66667	4	Flip, rotation	650	0	5000	0	115	0	0	115	0	Tak	PiecewiseConstantDecay	Adam	0.001	decay_steps=100000, decay_rate=0.96,	Tak	0.499235	4.5529	25.3536	0.527343	1.58365	10.3515	60.0246	4.42493	1.5569	9.84729	60.6762	4.09123	0.494856	4.50569	24.5686	0.527934	1.71472	10.8757	64.4532	4.65569	1.67038	10.0179	65.4344	4.26168
0.5	Rendering 1	dataset09.01.2023	sieć mobilna A	MobileNet V3 Small	224	1.66667	4	Flip, rotation	650	0	2500	0	115	0	0	115	0	Tak	PiecewiseConstantDecay	Adam	0.001	decay_steps=100000, decay_rate=0.96,	Tak	0.72127	6.07098	33.5944	1.09217	1.96341	11.445	76.8233	5.69047	1.9153	10.8576	76.1798	5.17403	0.694286	5.95613	34.1197	0.991497	2.15314	12.1384	80.9593	6.62996	2.07327	11.1661	80.0805	6.07297
0.5	Rendering 1	dataset09.01.2023	sieć mobilna A	MobileNet V3 Small	224	1.66667	4	Flip, rotation	650	0	0	0	115	0	0	115	0	Tak	PiecewiseConstantDecay	Adam	0.001	decay_steps=100000, decay_rate=0.96,	Tak	0.828557	5.06787	49.0948	1.22243	2.11268	11.9615	78.2111	6.59277	2.07093	11.419	78.4407	6.11237	0.771733	4.73684	45.8144	1.08371	2.35764	12.6937	85.6139	7.67053	2.26682	11.6839	84.3093	6.98129
0.5	Rendering 1	dataset09.01.2023	sieć mobilna A	MobileNet V3 Small	224	1.66667	4	Flip, rotation	650	0	5000	0	115	0	0	115	0	Tak	PiecewiseConstantDecay	Adam	0.001	decay_steps=100000, decay_rate=0.96,	Nie	0.499235	4.5529	25.3536	0.527343	1.58365	10.3515	60.0246	4.42493	1.5569	9.84729	60.6762	4.09123	0.494856	4.50569	24.5686	0.527934	1.71472	10.8757	64.4532	4.65569	1.67038	10.0179	65.4344	4.26168
0.5	Rendering 1	dataset09.01.2023	sieć mobilna A	MobileNet V3 Small	224	1.66667	4	Flip, rotation	650	0	2500	0	115	0	0	115	0	Tak	PiecewiseConstantDecay	Adam	0.001	decay_steps=100000, decay_rate=0.96,	Nie	0.72127	6.07098	33.5944	1.09217	1.96341	11.445	76.8233	5.69047	1.9153	10.8576	76.1798	5.17403	0.694286	5.95613	34.1197	0.991497	2.15314	12.1384	80.9593	6.62996	2.07327	11.1661	80.0805	6.07297
0.5	Rendering 1	dataset09.01.2023	sieć mobilna A	MobileNet V3 Small	224	1.66667	4	Flip, rotation	650	0	0	0	115	0	0	115	0	Tak	PiecewiseConstantDecay	Adam	0.001	decay_steps=100000, decay_rate=0.96,	Nie	0.828557	5.06787	49.0948	1.22243	2.11268	11.9615	78.2111	6.59277	2.07093	11.419	78.4407	6.11237	0.771733	4.73684	45.8144	1.08371	2.35764	12.6937	85.6139	7.67053	2.26682	11.6839	84.3093	6.98129
0.5	Rendering 1	dataset09.01.2023	sieć mobilna A	MobileNet V3 Small	224	2	4	Flip, rotation	650	0	5000	0	115	0	0	115	0	Tak	ExponentialDecay	Adam	1e-05	decay_steps=100000, decay_rate=0.96,	Tak	0.661954	5.77181	33.3127	0.88785	2.08871	13.1833	71.4049	6.70198	1.88188	11.0438	72.0025	5.38466	0.514244	4.64729	25.8455	0.55192	1.90212	11.3406	71.706	5.52913	1.90963	11.3827	71.291	5.6274
0.5	Rendering 1	dataset09.01.2023	sieć mobilna A	MobileNet V3 Small	224	2	4	Flip, rotation	650	0	2500	0	115	0	0	115	0	Tak	ExponentialDecay	Adam	1e-05	decay_steps=100000, decay_rate=0.96,	Tak	0.781225	6.48889	39.6415	1.18093	1.82252	10.8394	68.9126	5.35406	2.14714	13.2719	74.344	6.76415	0.61479	5.24615	31.6925	0.776103	1.75803	10.0545	69.107	4.77044	1.94974	11.6184	72.3687	5.77502
0.5	Rendering 1	dataset09.01.2023	sieć mobilna A	MobileNet V3 Small	224	2	4	Flip, rotation	650	0	0	0	115	0	0	115	0	Tak	ExponentialDecay	Adam	1e-05	decay_steps=100000, decay_rate=0.96,	Tak	0.857337	5.1816	53.6106	1.26096	1.50442	9.68864	60.576	3.98841	1.86721	12.2358	67.319	5.46633	0.736848	4.62624	47.1246	0.95065	1.55808	9.31662	65.278	3.8828	1.74995	10.8522	68.3032	4.77177
0.5	Rendering 1	dataset09.01.2023	sieć mobilna A	MobileNet V3 Small	224	2	4	Flip, rotation	650	0	5000	0	115	0	0	115	0	Tak	ExponentialDecay	Adam	0.001	decay_steps=100000, decay_rate=0.96,	Tak	0.374207	3.49133	18.5651	0.31054	1.8716	12.3961	69.3278	5.1129	1.64099	10.2167	67.3107	3.95688	0.354173	3.26274	17.9142	0.276464	1.18713	9.19661	51.6149	2.81376	1.14936	8.21046	49.4706	2.71596
0.5	Rendering 1	dataset09.01.2023	sieć mobilna A	MobileNet V3 Small	224	2	4	Flip, rotation	650	0	2500	0	115	0	0	115	0	Tak	ExponentialDecay	Adam	0.001	decay_steps=100000, decay_rate=0.96,	Tak	0.452193	4.02744	22.8366	0.448999	1.7797	10.8003	66.6419	5.17166	2.08505	13.1535	72.0944	6.48935	0.347529	3.12197	17.8903	0.257335	1.69239	9.93726	66.2329	4.41201	1.87157	11.4571	68.9488	5.45628
0.5	Rendering 1	dataset09.01.2023	sieć mobilna A	MobileNet V3 Small	224	2	4	Flip, rotation	650	0	0	0	115	0	0	115	0	Tak	ExponentialDecay	Adam	0.001	decay_steps=100000, decay_rate=0.96,	Tak	0.461526	3.08154	29.9641	0.396653	1.7202	10.5566	65.5201	4.82347	2.02969	12.9312	70.5691	6.1554	0.396902	2.6375	25.2691	0.309072	1.7243	10.0041	67.647	4.55829	1.9004	11.5235	70.3823	5.60806
0.5	Rendering 1	dataset09.01.2023	sieć mobilna A	MobileNet V3 Small	224	1.66667	4	Flip, rotation	650	0	5000	0	115	0	0	115	0	Tak	PiecewiseConstantDecay	RMSprop	1e-05	decay_steps=100000, decay_rate=0.96,	Tak	1.00136	8.08458	50.8518	1.91015	1.49834	9.87068	58.2606	3.94343	1.47987	9.38246	64.9222	3.5081	0.993241	8.05833	50.6084	1.9027	1.70379	10.7407	64.0844	4.80666	1.61593	9.73687	65.7515	4.1311
0.5	Rendering 1	dataset09.01.2023	sieć mobilna A	MobileNet V3 Small	224	1.66667	4	Flip, rotation	650	0	2500	0	115	0	0	115	0	Tak	PiecewiseConstantDecay	RMSprop	1e-05	decay_steps=100000, decay_rate=0.96,	Tak	1.21092	9.26438	60.4955	2.68977	1.68307	10.6181	63.8668	4.79095	1.67278	10.1133	66.6178	4.52891	1.17219	9.04761	59.5539	2.53954	2.02853	11.7903	72.9538	6.37298	1.88521	10.6317	70.8015	5.44894
0.5	Rendering 1	dataset09.01.2023	sieć mobilna A	MobileNet V3 Small	224	1.66667	4	Flip, rotation	650	0	0	0	115	0	0	115	0	Tak	PiecewiseConstantDecay	RMSprop	1e-05	decay_steps=100000, decay_rate=0.96,	Tak	1.13441	6.51307	79.2552	2.07213	1.65791	10.5709	69.8656	4.7411	1.61306	9.96259	69.9556	4.26835	1.23914	6.7727	74.2714	2.48191	1.737	10.9527	74.4819	5.11369	1.6891	10.0547	76.6283	4.56323
0.5	Rendering 1	dataset09.01.2023	sieć mobilna A	MobileNet V3 Small	224	1.66667	4	Flip, rotation	650	0	5000	0	115	0	0	115	0	Tak	PiecewiseConstantDecay	RMSprop	1e-05	decay_steps=100000, decay_rate=0.96,	Nie	1.00136	8.08458	50.8518	1.91015	1.49834	9.87068	58.2606	3.94343	1.47987	9.38246	64.9222	3.5081	0.993241	8.05833	50.6084	1.9027	1.70379	10.7407	64.0844	4.80666	1.61593	9.73687	65.7515	4.1311
0.5	Rendering 1	dataset09.01.2023	sieć mobilna A	MobileNet V3 Small	224	1.66667	4	Flip, rotation	650	0	2500	0	115	0	0	115	0	Tak	PiecewiseConstantDecay	RMSprop	1e-05	decay_steps=100000, decay_rate=0.96,	Nie	1.21092	9.26438	60.4955	2.68977	1.68307	10.6181	63.8668	4.79095	1.67278	10.1133	66.6178	4.52891	1.17219	9.04761	59.5539	2.53954	2.02853	11.7903	72.9538	6.37298	1.88521	10.6317	70.8015	5.44894
0.5	Rendering 1	dataset09.01.2023	sieć mobilna A	MobileNet V3 Small	224	1.66667	4	Flip, rotation	650	0	0	0	115	0	0	115	0	Tak	PiecewiseConstantDecay	RMSprop	1e-05	decay_steps=100000, decay_rate=0.96,	Nie	1.13441	6.51307	79.2552	2.07213	1.65791	10.5709	69.8656	4.7411	1.61306	9.96259	69.9556	4.26835	1.23914	6.7727	74.2714	2.48191	1.737	10.9527	74.4819	5.11369	1.6891	10.0547	76.6283	4.56323
0.5	Rendering 1	dataset09.01.2023	sieć mobilna A	MobileNet V3 Small	224	1.66667	4	Flip, rotation	650	0	5000	0	115	0	0	115	0	Tak	PiecewiseConstantDecay	RMSprop	0.001	decay_steps=100000, decay_rate=0.96,	Tak	0.341232	3.14204	17.2033	0.255361	1.36933	9.46721	55.6988	3.30673	1.35843	9.02295	58.7258	3.0652	0.343067	3.18575	17.0126	0.261237	1.38504	9.57213	55.7379	3.23659	1.32391	8.69231	56.1392	2.7622
0.5	Rendering 1	dataset09.01.2023	sieć mobilna A	MobileNet V3 Small	224	1.66667	4	Flip, rotation	650	0	2500	0	115	0	0	115	0	Tak	PiecewiseConstantDecay	RMSprop	0.001	decay_steps=100000, decay_rate=0.96,	Tak	0.406204	3.65587	20.4012	0.345135	1.47514	9.76723	62.8914	3.40331	1.43191	9.18716	63.2347	3.14527	0.392491	3.57121	19.4934	0.324491	1.69589	10.7314	63.9856	4.47926	1.6495	9.9264	64.9723	4.06538
0.5	Rendering 1	dataset09.01.2023	sieć mobilna A	MobileNet V3 Small	224	1.66667	4	Flip, rotation	650	0	0	0	115	0	0	115	0	Tak	PiecewiseConstantDecay	RMSprop	0.001	decay_steps=100000, decay_rate=0.96,	Tak	0.621358	4.06474	38.6297	0.714069	1.13735	8.30433	57.5404	2.35257	1.102	7.72174	55.5955	2.07309	0.657775	4.26357	41.5143	0.805963	1.2178	8.78203	48.7262	2.72545	1.15885	7.89947	52.8709	2.27976
0.5	Rendering 1	dataset09.01.2023	sieć mobilna A	MobileNet V3 Small	224	1.66667	4	Flip, rotation	650	0	5000	0	115	0	0	115	0	Tak	PiecewiseConstantDecay	RMSprop	0.001	decay_steps=100000, decay_rate=0.96,	Nie	0.341232	3.14204	17.2033	0.255361	1.36933	9.46721	55.6988	3.30673	1.35843	9.02295	58.7258	3.0652	0.343067	3.18575	17.0126	0.261237	1.38504	9.57213	55.7379	3.23659	1.32391	8.69231	56.1392	2.7622
0.5	Rendering 1	dataset09.01.2023	sieć mobilna A	MobileNet V3 Small	224	1.66667	4	Flip, rotation	650	0	2500	0	115	0	0	115	0	Tak	PiecewiseConstantDecay	RMSprop	0.001	decay_steps=100000, decay_rate=0.96,	Nie	0.406204	3.65587	20.4012	0.345135	1.47514	9.76723	62.8914	3.40331	1.43191	9.18716	63.2347	3.14527	0.392491	3.57121	19.4934	0.324491	1.69589	10.7314	63.9856	4.47926	1.6495	9.9264	64.9723	4.06538
0.5	Rendering 1	dataset09.01.2023	sieć mobilna A	MobileNet V3 Small	224	1.66667	4	Flip, rotation	650	0	0	0	115	0	0	115	0	Tak	PiecewiseConstantDecay	RMSprop	0.001	decay_steps=100000, decay_rate=0.96,	Nie	0.621358	4.06474	38.6297	0.714069	1.13735	8.30433	57.5404	2.35257	1.102	7.72174	55.5955	2.07309	0.657775	4.26357	41.5143	0.805963	1.2178	8.78203	48.7262	2.72545	1.15885	7.89947	52.8709	2.27976
0.5	Rendering 1	dataset09.01.2023	sieć mobilna A	MobileNet V3 Small	224	2	4	Flip, rotation	650	0	5000	0	115	0	0	115	0	Tak	ExponentialDecay	RMSprop	1e-05	decay_steps=100000, decay_rate=0.96,	Tak	0.610832	5.36102	31.2487	0.765084	1.34306	8.85879	65.8501	3.22223	1.29329	8.20497	70.0027	2.92694	0.491018	4.42064	24.8249	0.50981	1.48808	9.78611	60.1973	3.79985	1.43701	9.19229	64.4389	3.50031
0.5	Rendering 1	dataset09.01.2023	sieć mobilna A	MobileNet V3 Small	224	2	4	Flip, rotation	650	0	2500	0	115	0	0	115	0	Tak	ExponentialDecay	RMSprop	1e-05	decay_steps=100000, decay_rate=0.96,	Tak	0.719881	6.09953	37.8041	1.00214	1.48003	9.62846	63.053	3.9966	1.70523	11.7242	61.4543	4.93904	0.579607	5.01042	30.3589	0.690849	1.32299	8.51343	61.9293	3.04089	1.45541	9.86382	60.3715	3.71628
0.5	Rendering 1	dataset09.01.2023	sieć mobilna A	MobileNet V3 Small	224	2	4	Flip, rotation	650	0	0	0	115	0	0	115	0	Tak	ExponentialDecay	RMSprop	1e-05	decay_steps=100000, decay_rate=0.96,	Tak	0.83837	5.12777	56.4022	1.19074	1.34224	9.03426	63.9544	3.32057	1.59134	11.2381	60.2147	4.23081	0.724542	4.47511	47.4592	0.931654	1.53457	9.25612	64.5667	3.7436	1.67416	10.6371	64.2257	4.5385
0.5	Rendering 1	dataset09.01.2023	sieć mobilna A	MobileNet V3 Small	224	2	4	Flip, rotation	650	0	5000	0	115	0	0	115	0	Tak	ExponentialDecay	RMSprop	0.001	decay_steps=100000, decay_rate=0.96,	Tak	0.37532	3.54551	17.8685	0.324846	1.32436	9.3598	212.587	2.77766	1.34038	9.2614	205.922	2.81703	0.299097	2.81314	14.639	0.198767	0.875218	6.36951	45.2803	1.32494	0.84344	5.99182	44.6592	1.22165
0.5	Rendering 1	dataset09.01.2023	sieć mobilna A	MobileNet V3 Small	224	2	4	Flip, rotation	650	0	2500	0	115	0	0	115	0	Tak	ExponentialDecay	RMSprop	0.001	decay_steps=100000, decay_rate=0.96,	Tak	0.412654	3.70535	21.0726	0.37414	1.71128	10.4532	68.5924	4.59189	2.04176	12.895	72.5628	6.16065	0.329443	2.98879	16.3488	0.259432	1.56111	11.416	320.019	4.16768	1.65935	12.8522	260.619	4.5815
0.5	Rendering 1	dataset09.01.2023	sieć mobilna A	MobileNet V3 Small	224	2	4	Flip, rotation	650	0	0	0	115	0	0	115	0	Tak	ExponentialDecay	RMSprop	0.001	decay_steps=100000, decay_rate=0.96,	Tak	0.476519	3.14723	31.2665	0.421133	1.97746	17.3949	326.837	5.98274	1.6514	14.5521	212.202	4.23022	0.414786	2.71274	27.2362	0.318157	1.23821	7.86046	71.3387	2.38627	1.31465	8.99746	65.0409	2.92374
0.5	Rendering 1	dataset09.01.2023	sieć mobilna A	MobileNet V3 Small	224	#NAME?	1	Gaussian noise (strength 0.05)	650	0	5000	0	115	0	0	115	0	Tak	PiecewiseConstantDecay	Adam	1e-05	decay_steps=100000, decay_rate=0.96,	Nie	0.873919	7.37598	46.1186	1.4268	1.80423	11.2569	73.3524	5.01198	1.63526	10.341	63.9831	4.53304	0.853781	7.20942	44.268	1.39063	1.77411	11.3057	68.1062	5.11396	1.74782	11.1685	68.8903	5.01887
0.5	Rendering 1	dataset09.01.2023	sieć mobilna A	MobileNet V3 Small	224	#NAME?	1	Gaussian noise (strength 0.05)	650	0	2500	0	115	0	0	115	0	Tak	PiecewiseConstantDecay	Adam	1e-05	decay_steps=100000, decay_rate=0.96,	Nie	0.816966	6.76615	41.1139	1.29216	1.49262	10.1122	65.0027	3.66624	1.38514	9.43468	58.5722	3.49052	0.788907	6.61484	40.2212	1.18919	1.47216	10.229	58.7603	3.81118	1.48655	10.2192	59.8317	3.85297
0.5	Rendering 1	dataset09.01.2023	sieć mobilna A	MobileNet V3 Small	224	#NAME?	1	Gaussian noise (strength 0.05)	650	0	0	0	115	0	0	115	0	Tak	PiecewiseConstantDecay	Adam	1e-05	decay_steps=100000, decay_rate=0.96,	Nie	1.06074	6.02705	65.293	1.8448	1.71957	10.7132	68.0802	4.63481	1.62391	10.0591	64.9228	4.28515	1.03472	5.97751	67.8693	1.76259	1.73744	10.9361	67.0593	4.77259	1.81135	11.137	68.6973	5.19425
0.5	Rendering 1	dataset09.01.2023	sieć mobilna A	MobileNet V3 Small	224	#NAME?	1	Gaussian noise (strength 0.05)	650	0	5000	0	115	0	0	115	0	Tak	PiecewiseConstantDecay	Adam	0.001	decay_steps=100000, decay_rate=0.96,	Nie	0.309087	2.84154	15.6584	0.197153	1.50833	10.1978	59.241	3.76023	1.41256	9.52919	56.9754	3.48857	0.290394	2.71109	14.5314	0.181134	1.38663	9.86762	54.0728	3.43076	1.42248	9.92914	56.7796	3.51366
0.5	Rendering 1	dataset09.01.2023	sieć mobilna A	MobileNet V3 Small	224	#NAME?	1	Gaussian noise (strength 0.05)	650	0	2500	0	115	0	0	115	0	Tak	PiecewiseConstantDecay	Adam	0.001	decay_steps=100000, decay_rate=0.96,	Nie	0.362029	3.28082	18.5544	0.273647	1.42831	9.88134	55.4119	3.74117	1.32927	9.22879	53.2098	3.45201	0.343248	3.11166	17.5232	0.245803	1.45755	10.1995	56.9536	3.89333	1.4313	10.03	54.4523	3.8755
0.5	Rendering 1	dataset09.01.2023	sieć mobilna A	MobileNet V3 Small	224	#NAME?	1	Gaussian noise (strength 0.05)	650	0	0	0	115	0	0	115	0	Tak	PiecewiseConstantDecay	Adam	0.001	decay_steps=100000, decay_rate=0.96,	Nie	0.36534	2.46581	23.4497	0.248079	1.44047	9.9093	62.2443	3.58941	1.34533	9.25274	59.4966	3.3551	0.360882	2.38821	23.7478	0.234646	1.61812	10.8778	60.4371	4.56832	1.64086	10.8743	63.5732	4.54562
0.5	Rendering 1	dataset09.01.2023	sieć mobilna A	MobileNet V3 Small	224		1	Gaussian noise (strength 0.05)	650	0	5000	0	115	0	0	115	0	Nie	PiecewiseConstantDecay	Adam		decay_steps=100000, decay_rate=0.96,	Tak	0.407602	3.70103	21.1105	0.348283	1.01246	6.719	62.4367	1.95677	1.33127	9.64002	63.5558	3.03438	0.394715	3.5786	20.2792	0.333245	1.17713	8.13731	63.0905	2.47347	1.18716	8.27066	65.4301	2.67603
0.5	Rendering 1	dataset09.01.2023	sieć mobilna A	MobileNet V3 Small	224		1	Gaussian noise (strength 0.05)	650	0	2500	0	115	0	0	115	0	Nie	PiecewiseConstantDecay	Adam		decay_steps=100000, decay_rate=0.96,	Tak	0.49355	4.32327	25.9801	0.500631	1.07483	6.88511	66.9579	2.17171	1.41962	9.98884	72.9516	3.24164	0.452838	3.96061	24.3485	0.425116	1.2272	8.34086	68.2305	2.64845	1.27725	8.59943	80.1274	2.70424
0.5	Rendering 1	dataset09.01.2023	sieć mobilna A	MobileNet V3 Small	224		1	Gaussian noise (strength 0.05)	650	0	0	0	115	0	0	115	0	Nie	PiecewiseConstantDecay	Adam		decay_steps=100000, decay_rate=0.96,	Tak	0.476216	3.07066	32.5741	0.400709	1.2276	7.20371	60.3148	2.47178	1.60463	10.5102	66.6051	3.78071	0.482825	3.09661	33.09	0.418821	1.26812	8.08851	61.7367	2.63817	1.32827	8.37724	68.8254	2.90981
0.5	Rendering 1	dataset09.01.2023	sieć mobilna A	MobileNet V3 Small	224		1	Gaussian noise (strength 0.05)	650	0	5000	0	115	0	0	115	0	Nie	PiecewiseConstantDecay	Adam		decay_steps=100000, decay_rate=0.96,	Tak	0.117105	1.08751	6.02196	0.0297587	1.01588	6.71875	53.2006	2.05322	1.28572	9.38925	52.8285	2.96852	0.0874527	0.827365	4.39508	0.0183637	1.0316	7.36664	48.3855	2.03892	1.02905	7.4564	51.537	2.09718
0.5	Rendering 1	dataset09.01.2023	sieć mobilna A	MobileNet V3 Small	224		1	Gaussian noise (strength 0.05)	650	0	2500	0	115	0	0	115	0	Nie	PiecewiseConstantDecay	Adam		decay_steps=100000, decay_rate=0.96,	Tak	0.203219	1.85477	10.6995	0.0910244	1.13627	7.30762	51.9074	2.58034	1.57341	10.8168	59.842	4.2478	0.1767	1.62693	9.16167	0.0669506	1.36996	9.02112	54.2448	3.45035	1.33186	8.93402	55.0298	3.51033
0.5	Rendering 1	dataset09.01.2023	sieć mobilna A	MobileNet V3 Small	224		1	Gaussian noise (strength 0.05)	650	0	0	0	115	0	0	115	0	Nie	PiecewiseConstantDecay	Adam		decay_steps=100000, decay_rate=0.96,	Tak	0.183177	1.24912	11.9188	0.0664647	1.03024	6.81442	57.4866	2.05948	1.42334	10.1568	63.2185	3.41994	0.198985	1.33936	13.1947	0.0715168	1.11033	7.91802	47.6809	2.45892	1.1538	8.16158	55.8319	2.75542
0.5	Rendering 1	dataset09.01.2023	sieć mobilna A	MobileNet V3 Small	224		1	Gaussian noise (strength 0.05)	650	0	5000	0	115	0	0	115	0	Tak	CosineDecay	Adam	1		Tak	0.865	7.329	43.11	1.478	1.901	11.563	70.409	5.616	1.87	11.35	70.942	5.442	0.87	7.377	42.631	1.487	1.821	10.647	69.8	5.164	1.839	10.906	71.007	5.609
0.5	Rendering 1	dataset09.01.2023	sieć mobilna A	MobileNet V3 Small	224		1	Gaussian noise (strength 0.05)	650	0	2500	0	115	0	0	115	0	Tak	CosineDecay	Adam	1		Tak	0.787	6.575	39.83	1.239	1.126	8.03	55.598	2.332	1.173	8.258	61.771	2.426	0.798	6.712	40.371	1.246	1.431	9.438	62.432	3.614	1.357	9.087	57.012	3.397
0.5	Rendering 1	dataset09.01.2023	sieć mobilna A	MobileNet V3 Small	224		1	Gaussian noise (strength 0.05)	650	0	0	0	115	0	0	115	0	Tak	CosineDecay	Adam	1		Tak	0.646	4.144	39.868	0.785	1.197	8.447	55.584	2.751	1.19	8.444	56.224	2.674	0.637	4.138	37.482	0.787	1.263	8.758	54.149	2.984	1.203	8.431	54.649	2.824
0.5	Rendering 1	dataset09.01.2023	sieć mobilna A	MobileNet V3 Small	224		1	Gaussian noise (strength 0.05)	650	0	5000	0	115	0	0	115	0	Tak	CosineDecay	Adam	1		Nie	0.287	2.678	14.475	0.172	0.996	7.242	108.689	1.457	1.085	7.8	121.009	1.664	0.291	2.715	14.687	0.176	0.695	5.138	48.045	0.864	0.701	5.22	49.147	0.928
0.5	Rendering 1	dataset09.01.2023	sieć mobilna A	MobileNet V3 Small	224		1	Gaussian noise (strength 0.05)	650	0	2500	0	115	0	0	115	0	Tak	CosineDecay	Adam	1		Nie	0.243	2.203	12.726	0.121	0.85	6.182	62.577	1.22	0.814	5.917	64.233	1.127	0.247	2.251	12.864	0.13	0.834	6.168	51.458	1.253	0.829	6.083	54.112	1.262
0.5	Rendering 1	dataset09.01.2023	sieć mobilna A	MobileNet V3 Small	224		1	Gaussian noise (strength 0.05)	650	0	0	0	115	0	0	115	0	Tak	CosineDecay	Adam	1		Nie	0.246	1.67	16.207	0.111	0.923	6.902	51.281	1.674	0.916	6.871	53.486	1.625	0.215	1.453	14.296	0.087	0.916	6.84	50.635	1.647	0.877	6.631	45.42	1.546
0.5	Rendering 1	dataset09.01.2023	sieć mobilna A	MobileNet V3 Small	224	2	1	Gaussian noise (strength 0.05)	650	0	5000	0	115	0	0	115	0	Tak	ExponentialDecay	Adam				0.456253	4.10614	23.5315	0.42599	0.940278	6.94517	48.7187	1.66445	0.926181	6.7898	50.6724	1.54492	0.383032	3.46111	19.5965	0.295095	1.13214	8.18787	46.6477	2.35703	1.12733	8.14127	46.3054	2.47192
0.5	Rendering 1	dataset09.01.2023	sieć mobilna A	MobileNet V3 Small	224	2	1	Gaussian noise (strength 0.05)	650	0	2500	0	115	0	0	115	0	Tak	ExponentialDecay	Adam				0.506889	4.39903	27.2961	0.512685	0.82455	6.1173	56.7899	1.19389	0.818181	5.98396	61.1117	1.14898	0.422622	3.79144	22.9793	0.358732	1.04167	7.64706	49.5147	1.93537	1.02834	7.53372	50.781	1.99243
0.5	Rendering 1	dataset09.01.2023	sieć mobilna A	MobileNet V3 Small	224	2	1	Gaussian noise (strength 0.05)	650	0	0	0	115	0	0	115	0	Tak	ExponentialDecay	Adam				0.611263	3.83399	41.0684	0.656617	1.09076	7.82628	54.9719	2.09916	1.03123	7.39524	54.9443	1.89425	0.471363	3.01906	31.2068	0.381897	1.07477	7.87734	46.9084	2.12024	1.0749	7.81763	48.9374	2.21031
0.5	Rendering 1	dataset09.01.2023	sieć mobilna A	MobileNet V3 Small	224	2	1	Gaussian noise (strength 0.05)	650	0	5000	0	115	0	0	115	0	Tak	ExponentialDecay	Adam				0.615853	5.55849	29.7568	0.841357	12.9145	261.395	4642.24	177.843	13.1088	269.082	5115.02	187.543	0.504625	4.62196	24.8515	0.555419	1.49769	9.92075	56.9969	4.04852	1.45018	9.6131	56.524	4.02366
0.5	Rendering 1	dataset09.01.2023	sieć mobilna A	MobileNet V3 Small	224	2	1	Gaussian noise (strength 0.05)	650	0	2500	0	115	0	0	115	0	Tak	ExponentialDecay	Adam				0.662529	5.57521	34.089	0.905661	8.21027	198.269	3774.91	147.852	7.20187	144.31	2671.04	99.0172	0.52263	4.5923	26.5739	0.589477	3.43345	51.9172	524.798	50.2366	3.85038	57.9552	608.866	55.8176
0.5	Rendering 1	dataset09.01.2023	sieć mobilna A	MobileNet V3 Small	224	2	1	Gaussian noise (strength 0.05)	650	0	0	0	115	0	0	115	0	Tak	ExponentialDecay	Adam				1.42064	7.35289	73.0152	3.11929	43.9296	2237.69	39273.8	1949.5	44.4486	2289.15	42587.4	2003.88	0.892338	5.3494	58.2285	1.44437	4.00116	183.888	3754.17	162.603	3.97487	179.69	3907.9	159.342
0.5	Rendering 1	dataset09.01.2023	sieć mobilna A	MobileNet V3 Small	224	#NAME?	1	Gaussian noise (strength 0.05)	650	0	0	0	115	0	0	115	0	Tak	PiecewiseConstantDecay	RMSprop	1e-05	decay_steps=100000, decay_rate=0.96,	Tak	0.897337	5.38676	61.5192	1.36732	1.43582	9.65807	56.3626	3.57006	1.43802	9.47088	63.2594	3.42226	0.922413	5.59273	66.7923	1.38252	1.44162	9.91712	62.3109	3.3732	1.39165	9.68272	60.1081	3.30386
0.5	Rendering 1	dataset09.01.2023	sieć mobilna A	MobileNet V3 Small	224	#NAME?	1	Gaussian noise (strength 0.05)	650	0	2500	0	115	0	0	115	0	Tak	PiecewiseConstantDecay	RMSprop	1e-05	decay_steps=100000, decay_rate=0.96,	Tak	0.792323	6.61118	41.7999	1.21543	1.48544	10.0454	76.5369	3.55562	1.36136	9.27239	66.4087	3.22848	0.779574	6.48812	41.1461	1.15072	1.46624	10.1855	63.7561	3.74174	1.41831	9.89265	62.1235	3.56941
0.5	Rendering 1	dataset09.01.2023	sieć mobilna A	MobileNet V3 Small	224	#NAME?	1	Gaussian noise (strength 0.05)	650	0	5000	0	115	0	0	115	0	Tak	PiecewiseConstantDecay	RMSprop	1e-05	decay_steps=100000, decay_rate=0.96,	Tak	0.690077	5.93093	36.4059	0.901261	1.40327	9.63849	74.5113	3.19154	1.21144	8.55834	61.7687	2.67446	0.672758	5.83434	36.1614	0.858414	1.30335	9.3959	60.7608	3.02317	1.35346	9.5593	64.957	3.12436
0.5	Rendering 1	dataset09.01.2023	sieć mobilna A	MobileNet V3 Small	224	#NAME?	1	Gaussian noise (strength 0.05)	650	0	5000	0	115	0	0	115	0	Tak	PiecewiseConstantDecay	RMSprop	0.001	decay_steps=100000, decay_rate=0.96,	Nie	0.222431	2.08933	11.0864	0.105703	1.03855	7.65213	98.1754	1.82975	0.885844	6.72476	65.0262	1.56763	0.213326	2.02716	10.4477	0.0971154	0.975225	7.45403	62.0959	1.6852	1.01576	7.64125	70.3868	1.78302
0.5	Rendering 1	dataset09.01.2023	sieć mobilna A	MobileNet V3 Small	224	#NAME?	1	Gaussian noise (strength 0.05)	650	0	2500	0	115	0	0	115	0	Tak	PiecewiseConstantDecay	RMSprop	0.001	decay_steps=100000, decay_rate=0.96,	Nie	0.264669	2.43072	13.6615	0.146106	1.05851	7.78885	70.2028	1.84591	0.96777	7.2069	62.5115	1.74488	0.243728	2.21759	12.631	0.127018	1.02932	7.88184	58.4743	1.92749	1.06165	7.9753	65.7371	1.97325
0.5	Rendering 1	dataset09.01.2023	sieć mobilna A	MobileNet V3 Small	224	#NAME?	1	Gaussian noise (strength 0.05)	650	0	0	0	115	0	0	115	0	Tak	PiecewiseConstantDecay	RMSprop	0.001	decay_steps=100000, decay_rate=0.96,	Nie	0.339593	2.2641	21.7705	0.20531	1.02842	7.55916	45.7158	1.94318	0.979908	7.22562	44.5876	1.8239	0.302637	2.0205	19.9224	0.175286	1.5108	10.4664	54.1586	4.17882	1.51584	10.3933	56.3864	4.02509
0.5	Rendering 1	dataset09.01.2023	sieć mobilna A	MobileNet V3 Small	224		1	Gaussian noise (strength 0.05)	650	0	5000	0	115	0	0	115	0	Nie	PiecewiseConstantDecay	RMSprop		decay_steps=100000, decay_rate=0.96,	Tak	0.28768	2.63479	14.9842	0.174181	0.98845	6.61331	81.8835	1.86619	1.21624	8.99029	70.7012	2.60127	0.279405	2.5866	14.4015	0.169677	1.11681	7.89559	68.3417	2.31851	1.16525	8.18561	89.7616	2.41828
0.5	Rendering 1	dataset09.01.2023	sieć mobilna A	MobileNet V3 Small	224		1	Gaussian noise (strength 0.05)	650	0	2500	0	115	0	0	115	0	Nie	PiecewiseConstantDecay	RMSprop		decay_steps=100000, decay_rate=0.96,	Tak	0.38919	3.41181	21.2757	0.315357	0.923554	6.13712	71.0844	1.55107	1.23379	9.11403	75.208	2.50978	0.373834	3.34122	20.2407	0.295145	1.13998	7.89313	63.3432	2.24974	1.19018	8.25056	82.1533	2.56555
0.5	Rendering 1	dataset09.01.2023	sieć mobilna A	MobileNet V3 Small	224		1	Gaussian noise (strength 0.05)	650	0	0	0	115	0	0	115	0	Nie	PiecewiseConstantDecay	RMSprop		decay_steps=100000, decay_rate=0.96,	Tak	0.38569	2.42459	26.1751	0.252591	0.904732	6.08581	60.8406	1.54311	1.1549	8.7145	59.7244	2.41689	0.371691	2.41669	26.2931	0.237841	1.08947	7.65635	60.5765	2.07399	1.07788	7.56253	69.0353	2.1085
0.5	Rendering 1	dataset09.01.2023	sieć mobilna A	MobileNet V3 Small	224		1	Gaussian noise (strength 0.05)	650	0	5000	0	115	0	0	115	0	Nie	PiecewiseConstantDecay	RMSprop		decay_steps=100000, decay_rate=0.96,	Tak	0.0631604	0.607754	3.11579	0.00924813	0.755138	5.32038	76.3781	0.977612	0.731899	5.81128	54.9715	0.951917	0.0493389	0.479618	2.40435	0.00626087	0.728769	5.3998	63.9782	0.92539	0.689156	5.13653	59.3593	0.826031
0.5	Rendering 1	dataset09.01.2023	sieć mobilna A	MobileNet V3 Small	224		1	Gaussian noise (strength 0.05)	650	0	2500	0	115	0	0	115	0	Nie	PiecewiseConstantDecay	RMSprop		decay_steps=100000, decay_rate=0.96,	Tak	0.0778847	0.735241	3.93374	0.0143717	0.748335	5.01567	78.9303	1.05137	0.860109	6.74464	58.5779	1.32165	0.061284	0.585428	3.06716	0.00902408	0.682543	5.06043	55.1912	0.91298	0.704047	5.21324	58.4895	0.896831
0.5	Rendering 1	dataset09.01.2023	sieć mobilna A	MobileNet V3 Small	224		1	Gaussian noise (strength 0.05)	650	0	0	0	115	0	0	115	0	Nie	PiecewiseConstantDecay	RMSprop		decay_steps=100000, decay_rate=0.96,	Tak	0.135502	0.890924	9.502	0.0301414	1.11032	7.24422	53.5169	2.41798	1.53238	10.7364	58.6466	4.03385	0.097871	0.646938	6.80301	0.0166831	1.30026	8.79537	53.2108	3.0305	1.28932	8.81679	54.8191	3.19154
0.5	Rendering 1	dataset09.01.2023	sieć mobilna A	MobileNet V3 Small	224		1	Gaussian noise (strength 0.05)	650	0	5000	0	115	0	0	115	0	Tak	CosineDecay	RMSprop	1		Tak	0.79	6.879	38.458	1.257	1.275	9.065	61.264	2.788	1.273	8.989	63.438	2.868	0.783	6.775	39.208	1.228	1.211	8.332	55.251	2.686	1.24	8.648	60.618	2.92
0.5	Rendering 1	dataset09.01.2023	sieć mobilna A	MobileNet V3 Small	224		1	Gaussian noise (strength 0.05)	650	0	2500	0	115	0	0	115	0	Tak	CosineDecay	RMSprop	1		Tak	0.753	6.448	38.004	1.14	1.067	7.705	60.821	1.984	1.124	7.944	69.582	2.1	0.761	6.5	38.591	1.179	1.344	9.061	71.746	3.052	1.285	8.749	67.478	2.91
0.5	Rendering 1	dataset09.01.2023	sieć mobilna A	MobileNet V3 Small	224		1	Gaussian noise (strength 0.05)	650	0	0	0	115	0	0	115	0	Tak	CosineDecay	RMSprop	1		Tak	0.603	3.904	38.276	0.668	1.083	7.789	60.411	2.276	1.094	7.833	68.186	2.195	0.591	3.835	38.064	0.653	1.174	8.269	62.833	2.532	1.107	7.835	64.852	2.262
0.5	Rendering 1	dataset09.01.2023	sieć mobilna A	MobileNet V3 Small	224		1	Gaussian noise (strength 0.05)	650	0	5000	0	115	0	0	115	0	Tak	CosineDecay	RMSprop	1		Nie	0.26	2.445	13.147	0.142	0.804	6.252	46.191	1.35	0.841	6.52	43.258	1.51	0.262	2.461	13.15	0.142	0.813	6.119	37.053	1.401	0.765	5.925	36.501	1.313
0.5	Rendering 1	dataset09.01.2023	sieć mobilna A	MobileNet V3 Small	224		1	Gaussian noise (strength 0.05)	650	0	2500	0	115	0	0	115	0	Tak	CosineDecay	RMSprop	1		Nie	0.249	2.246	13.095	0.127	1.193	8.463	153.15	2.103	1.167	8.207	151.353	2.032	0.251	2.255	13.244	0.128	0.765	5.82	56.044	1.128	0.755	5.784	49.71	1.128
0.5	Rendering 1	dataset09.01.2023	sieć mobilna A	MobileNet V3 Small	224		1	Gaussian noise (strength 0.05)	650	0	0	0	115	0	0	115	0	Tak	CosineDecay	RMSprop	1		Nie	0.247	1.66	16.272	0.109	0.884	6.503	71.653	1.407	0.871	6.389	73.463	1.331	0.206	1.365	13.821	0.075	0.999	7.365	50.449	1.819	0.974	7.168	47.646	1.691
0.5	Rendering 1	dataset09.01.2023	sieć mobilna A	MobileNet V3 Small	224		2	Gaussian noise (strength 0.05)	650	0	5000	0	115	0	0	115	0	Tak	CosineDecay	RMSprop	1		Tak	0.801	6.991	39.411	1.299	1.658	10.829	78.316	4.476	1.613	10.545	74.966	4.365	0.797	6.904	39.396	1.267	1.478	9.53	66.151	3.895	1.554	10.027	78.871	4.347
0.5	Rendering 1	dataset09.01.2023	sieć mobilna A	MobileNet V3 Small	224	2	1	Gaussian noise (strength 0.05)	650	0	5000	0	115	0	0	115	0	Tak	ExponentialDecay	RMSprop				0.398464	3.62587	20.5537	0.317157	0.795041	6.04083	45.0689	1.22695	0.789532	5.88463	49.3187	1.1794	0.326276	2.98599	16.8108	0.213851	0.969712	7.27254	44.8259	1.67132	0.958985	7.13782	44.8398	1.67351
0.5	Rendering 1	dataset09.01.2023	sieć mobilna A	MobileNet V3 Small	224	2	1	Gaussian noise (strength 0.05)	650	0	2500	0	115	0	0	115	0	Tak	ExponentialDecay	RMSprop				0.478682	4.25267	24.867	0.452317	0.921486	6.79273	53.8918	1.44744	0.895463	6.56561	54.8815	1.38477	0.349963	3.114	18.6964	0.236318	1.15434	8.31467	51.583	2.37872	1.1384	8.19386	50.3814	2.44601
0.5	Rendering 1	dataset09.01.2023	sieć mobilna A	MobileNet V3 Small	224	2	1	Gaussian noise (strength 0.05)	650	0	0	0	115	0	0	115	0	Tak	ExponentialDecay	RMSprop				0.686624	4.53398	43.9547	0.828093	1.17084	8.30404	57.3208	2.39731	1.12834	7.99452	57.6461	2.31307	0.431903	2.82804	28.7415	0.331434	1.2915	8.98947	52.5943	2.89732	1.26651	8.82359	52.1915	2.9533
0.5	Rendering 1	dataset09.01.2023	sieć mobilna A	MobileNet V3 Small	224	2	1	Gaussian noise (strength 0.05)	650	0	5000	0	115	0	0	115	0	Tak	ExponentialDecay	RMSprop				0.844838	7.14822	40.9845	1.4871	2.47511	12.6823	86.3774	8.35159	2.42324	12.3337	86.0872	8.09347	0.632786	5.58134	30.8529	0.853581	2.60555	12.9864	89.9517	9.10617	2.52366	12.6164	88.0898	8.85812
0.5	Rendering 1	dataset09.01.2023	sieć mobilna A	MobileNet V3 Small	224	2	1	Gaussian noise (strength 0.05)	650	0	2500	0	115	0	0	115	0	Tak	ExponentialDecay	RMSprop				1.11728	8.72478	53.8815	2.34375	5.2574	111.659	969.603	84.4024	5.52247	118.89	965.134	86.2713	2.29326	14.4034	90.102	7.92837	1.92755	11.5008	70.5881	5.88635	1.87304	11.199	70.0276	5.75563
0.5	Rendering 1	dataset09.01.2023	sieć mobilna A	MobileNet V3 Small	224	2	1	Gaussian noise (strength 0.05)	650	0	0	0	115	0	0	115	0	Tak	ExponentialDecay	RMSprop				1.50807	7.70702	71.5059	3.40758	33.702	5400.22	81406	5183.06	35.6363	4839.1	79278.8	4610.13	0.697731	4.374	44.3589	0.893582	17.2276	437.216	8277.23	327.277	17.9493	463.093	9832.36	351.501
0.5	Rendering 1	dataset09.01.2023	sieć mobilna A	MobileNet V3 Small	224	#NAME?	2	Gaussian noise (strength 0.1)	650	0	5000	0	115	0	0	115	0	Tak	PiecewiseConstantDecay	Adam	1e-05	decay_steps=100000, decay_rate=0.96,	Nie	0.8023	6.90266	40.7487	1.25424	1.94359	11.7909	71.7979	5.8308	1.76916	10.85	66.2861	5.15205	0.796556	6.78315	40.1735	1.24625	1.89247	11.8189	67.6978	5.80871	1.89828	11.7529	69.4423	5.7644
0.5	Rendering 1	dataset09.01.2023	sieć mobilna A	MobileNet V3 Small	224	#NAME?	2	Gaussian noise (strength 0.1)	650	0	2500	0	115	0	0	115	0	Tak	PiecewiseConstantDecay	Adam	1e-05	decay_steps=100000, decay_rate=0.96,	Nie	0.936721	7.59359	48.9534	1.5966	1.81913	11.348	73.3432	5.10615	1.66613	10.4447	65.1269	4.6667	0.936497	7.48099	49.2851	1.61851	1.77884	11.3502	68.1603	5.10104	1.73474	11.1593	65.9595	5.00006
0.5	Rendering 1	dataset09.01.2023	sieć mobilna A	MobileNet V3 Small	224	#NAME?	2	Gaussian noise (strength 0.1)	650	0	0	0	115	0	0	115	0	Tak	PiecewiseConstantDecay	Adam	1e-05	decay_steps=100000, decay_rate=0.96,	Nie	1.0785	6.22204	70.9851	1.97911	1.99907	11.7566	75.7288	5.84893	1.9528	11.2438	74.3935	5.85518	1.08635	6.20651	75.6611	1.81397	2.06347	12.2494	77.1865	6.40015	1.99548	11.88	76.2099	6.03141
0.5	Rendering 1	dataset09.01.2023	sieć mobilna A	MobileNet V3 Small	224	#NAME?	2	Gaussian noise (strength 0.1)	650	0	5000	0	115	0	0	115	0	Tak	PiecewiseConstantDecay	Adam	0.001	decay_steps=100000, decay_rate=0.96,	Nie	0.292837	2.77742	14.3572	0.188201	1.60578	10.6343	61.2692	4.3904	1.47116	9.83287	56.403	4.04118	0.265214	2.51674	13.0634	0.150989	1.51452	10.4591	56.0782	4.28093	1.50873	10.3437	57.3383	4.19822
0.5	Rendering 1	dataset09.01.2023	sieć mobilna A	MobileNet V3 Small	224	#NAME?	2	Gaussian noise (strength 0.1)	650	0	2500	0	115	0	0	115	0	Tak	PiecewiseConstantDecay	Adam	0.001	decay_steps=100000, decay_rate=0.96,	Nie	0.355869	3.22312	18.2887	0.276378	1.45486	10.0146	58.2538	3.78315	1.33618	9.27634	52.3283	3.54776	0.347105	3.14272	17.5616	0.262349	1.47004	10.2866	54.6146	4.08847	1.46942	10.2082	54.7823	4.02003
0.5	Rendering 1	dataset09.01.2023	sieć mobilna A	MobileNet V3 Small	224	#NAME?	2	Gaussian noise (strength 0.1)	650	0	0	0	115	0	0	115	0	Tak	PiecewiseConstantDecay	Adam	0.001	decay_steps=100000, decay_rate=0.96,	Nie	0.412015	2.7073	27.2954	0.303915	1.44055	9.88882	64.3595	3.3609	1.3148	9.1174	57.6183	3.01625	0.436569	2.89982	27.5676	0.359601	1.42681	10.0844	58.4608	3.51565	1.51436	10.3578	64.2266	3.71092
0.5	Rendering 1	dataset09.01.2023	sieć mobilna A	MobileNet V3 Small	224		2	Gaussian noise (strength 0.1)	650	0	5000	0	115	0	0	115	0	Nie	PiecewiseConstantDecay	Adam		decay_steps=100000, decay_rate=0.96,	Tak	0.495397	4.45758	25.1807	0.522287	1.22231	7.57149	62.3619	2.74266	1.58481	10.8125	66.1616	4.10682	0.496673	4.52143	25.1888	0.531591	1.33998	8.83917	57.9196	3.22667	1.45429	9.44328	70.5097	3.82658
0.5	Rendering 1	dataset09.01.2023	sieć mobilna A	MobileNet V3 Small	224		2	Gaussian noise (strength 0.1)	650	0	2500	0	115	0	0	115	0	Nie	PiecewiseConstantDecay	Adam		decay_steps=100000, decay_rate=0.96,	Tak	0.544043	4.74966	28.8414	0.613394	1.22663	7.6237	59.8081	2.77615	1.60047	10.9199	66.3496	4.20391	0.552685	4.84531	28.7838	0.637513	1.44464	9.2976	61.9182	3.41902	1.43786	9.39703	71.8757	3.68763
0.5	Rendering 1	dataset09.01.2023	sieć mobilna A	MobileNet V3 Small	224		2	Gaussian noise (strength 0.1)	650	0	0	0	115	0	0	115	0	Nie	PiecewiseConstantDecay	Adam		decay_steps=100000, decay_rate=0.96,	Tak	0.562743	3.50433	37.1581	0.547447	1.21896	7.41786	67.2583	2.48383	1.44738	9.98648	64.5346	3.29905	0.535038	3.40075	36.2482	0.501763	1.39894	8.85628	66.2932	3.14462	1.44227	9.13801	71.0762	3.51115
0.5	Rendering 1	dataset09.01.2023	sieć mobilna A	MobileNet V3 Small	224		2	Gaussian noise (strength 0.1)	650	0	5000	0	115	0	0	115	0	Nie	PiecewiseConstantDecay	Adam		decay_steps=100000, decay_rate=0.96,	Tak	0.185942	1.79194	8.97382	0.0865144	0.968664	6.45209	84.338	1.62672	1.13202	8.56218	65.8785	2.21279	0.160165	1.55962	7.62622	0.0651505	0.974747	7.03943	71.0268	1.69919	1.05467	7.51736	79.5672	1.93928
0.5	Rendering 1	dataset09.01.2023	sieć mobilna A	MobileNet V3 Small	224		2	Gaussian noise (strength 0.1)	650	0	2500	0	115	0	0	115	0	Nie	PiecewiseConstantDecay	Adam		decay_steps=100000, decay_rate=0.96,	Tak	0.216713	2.02169	10.947	0.112162	1.10376	7.22554	50.937	2.44947	1.52739	10.6846	60.286	4.03551	0.203974	1.91699	10.1673	0.107629	1.27916	8.71178	51.1515	3.05848	1.27458	8.77147	53.9273	3.28982
0.5	Rendering 1	dataset09.01.2023	sieć mobilna A	MobileNet V3 Small	224		2	Gaussian noise (strength 0.1)	650	0	0	0	115	0	0	115	0	Nie	PiecewiseConstantDecay	Adam		decay_steps=100000, decay_rate=0.96,	Tak	0.192761	1.30981	12.8394	0.076309	1.1248	7.23983	56.3752	2.37282	1.47052	10.3844	59.7519	3.65805	0.210295	1.42574	13.6858	0.0850768	1.22892	8.41921	54.3177	2.72226	1.2579	8.66147	59.3248	3.0045
0.5	Rendering 1	dataset09.01.2023	sieć mobilna A	MobileNet V3 Small	224		2	Gaussian noise (strength 0.1)	650	0	5000	0	115	0	0	115	0	Tak	CosineDecay	Adam	1		Tak	0.836	7.106	41.378	1.397	1.716	11.011	81.539	4.723	1.7	10.874	80.517	4.784	0.857	7.294	41.179	1.449	1.56	9.851	73.942	4.102	1.608	10.21	86.219	4.453
0.5	Rendering 1	dataset09.01.2023	sieć mobilna A	MobileNet V3 Small	224		2	Gaussian noise (strength 0.1)	650	0	2500	0	115	0	0	115	0	Tak	CosineDecay	Adam	1		Tak	0.881	7.32	44.449	1.528	1.44	9.474	70.09	3.579	1.435	9.507	70.05	3.525	0.885	7.328	43.875	1.528	1.706	10.513	78.024	4.817	1.64	10.182	75.533	4.728
0.5	Rendering 1	dataset09.01.2023	sieć mobilna A	MobileNet V3 Small	224		2	Gaussian noise (strength 0.1)	650	0	0	0	115	0	0	115	0	Tak	CosineDecay	Adam	1		Tak	0.667	4.26	40.965	0.808	1.206	8.47	59.035	2.785	1.171	8.321	59.099	2.686	0.639	4.095	39.581	0.764	1.274	8.779	56.988	3.037	1.218	8.444	60.332	2.766
0.5	Rendering 1	dataset09.01.2023	sieć mobilna A	MobileNet V3 Small	224		2	Gaussian noise (strength 0.1)	650	0	5000	0	115	0	0	115	0	Tak	CosineDecay	Adam	1		Nie	0.313	2.899	15.873	0.203	1.127	8.031	117.203	2.033	1.244	8.706	120.044	2.279	0.314	2.935	15.707	0.215	0.964	6.85	63.736	1.787	0.977	6.928	75.383	1.848
0.5	Rendering 1	dataset09.01.2023	sieć mobilna A	MobileNet V3 Small	224		2	Gaussian noise (strength 0.1)	650	0	2500	0	115	0	0	115	0	Tak	CosineDecay	Adam	1		Nie	0.278	2.557	14.071	0.168	0.761	5.924	45.291	1.132	0.765	5.919	45.731	1.053	0.265	2.433	13.549	0.15	0.867	6.538	42.056	1.47	0.843	6.328	41.445	1.409
0.5	Rendering 1	dataset09.01.2023	sieć mobilna A	MobileNet V3 Small	224		2	Gaussian noise (strength 0.1)	650	0	0	0	115	0	0	115	0	Tak	CosineDecay	Adam	1		Nie	0.255	1.73	16.917	0.12	1.297	8.89	53.058	2.933	1.319	9.049	53.281	3.047	0.228	1.554	14.729	0.094	1.355	9.08	54.544	3.173	1.302	8.753	54.114	2.888
0.5	Rendering 1	dataset09.01.2023	sieć mobilna A	MobileNet V3 Small	224	2	2	Gaussian noise (strength 0.1)	650	0	5000	0	115	0	0	115	0	Tak	ExponentialDecay	Adam				0.474706	4.3051	24.9241	0.460875	1.18801	8.43769	51.3379	2.47477	1.15181	8.15599	52.1336	2.39613	0.409585	3.761	20.5907	0.358356	1.36112	9.34627	53.7515	3.25455	1.32127	9.09537	52.9896	3.19919
0.5	Rendering 1	dataset09.01.2023	sieć mobilna A	MobileNet V3 Small	224	2	2	Gaussian noise (strength 0.1)	650	0	2500	0	115	0	0	115	0	Tak	ExponentialDecay	Adam				0.535887	4.71918	27.9863	0.57395	0.935069	6.94211	48.2526	1.66392	0.906406	6.71141	49.6754	1.57041	0.459086	4.15205	23.9201	0.42438	1.08273	7.94311	47.0264	2.2241	1.02553	7.61058	43.1596	2.1925
0.5	Rendering 1	dataset09.01.2023	sieć mobilna A	MobileNet V3 Small	224	2	2	Gaussian noise (strength 0.1)	650	0	0	0	115	0	0	115	0	Tak	ExponentialDecay	Adam				0.572174	3.6352	37.2725	0.582961	1.07151	7.68615	62.5556	2.04569	0.994048	7.18723	59.8351	1.82585	0.495179	3.20656	32.8646	0.440035	1.08024	7.90466	53.2328	2.1939	1.09654	7.89183	59.7093	2.27894
0.5	Rendering 1	dataset09.01.2023	sieć mobilna A	MobileNet V3 Small	224	2	2	Gaussian noise (strength 0.1)	650	0	5000	0	115	0	0	115	0	Tak	ExponentialDecay	Adam				0.568388	5.17463	27.537	0.70659	1.7136	10.4081	69.9645	4.39427	1.65976	10.0987	69.7708	4.19541	0.483563	4.43987	23.4407	0.525446	1.68351	10.389	65.5378	4.69227	1.69293	10.3938	66.0997	4.7664
0.5	Rendering 1	dataset09.01.2023	sieć mobilna A	MobileNet V3 Small	224	2	2	Gaussian noise (strength 0.1)	650	0	2500	0	115	0	0	115	0	Tak	ExponentialDecay	Adam				0.553501	4.81475	27.9945	0.655432	3.27285	13.5775	107.12	12.9419	3.21416	13.2223	107.169	12.585	0.485757	4.31224	25.0079	0.506862	1.65369	10.6005	92.7227	4.55916	1.58956	10.2122	112.437	4.26125
0.5	Rendering 1	dataset09.01.2023	sieć mobilna A	MobileNet V3 Small	224	2	2	Gaussian noise (strength 0.1)	650	0	0	0	115	0	0	115	0	Tak	ExponentialDecay	Adam				1.38111	7.73598	76.993	3.55836	278.94	84217.3	1541217	82355.5	282.735	86730.6	1.62357e+06	84866.5	0.799177	4.95622	50.5131	1.19267	132.623	30288.8	438031	29386.5	135.214	30253.8	466587	29328.2
0.5	Rendering 1	dataset09.01.2023	sieć mobilna A	MobileNet V3 Small	224	#NAME?	2	Gaussian noise (strength 0.1)	650	0	5000	0	115	0	0	115	0	Tak	PiecewiseConstantDecay	RMSprop	1e-05	decay_steps=100000, decay_rate=0.96,	Nie	0.72024	6.26678	37.6551	1.02465	1.7113	11.0045	70.8468	4.73518	1.60358	10.29	66.8958	4.36816	0.694114	6.03905	35.8572	0.952837	1.73493	11.2843	70.8605	4.88756	1.69865	11.0712	65.4274	4.88419
0.5	Rendering 1	dataset09.01.2023	sieć mobilna A	MobileNet V3 Small	224	#NAME?	2	Gaussian noise (strength 0.1)	650	0	2500	0	115	0	0	115	0	Tak	PiecewiseConstantDecay	RMSprop	1e-05	decay_steps=100000, decay_rate=0.96,	Nie	0.909766	7.25695	50.8314	1.55498	1.65468	10.7581	71.4588	4.36354	1.51147	9.90767	67.0479	3.91547	0.883225	7.03506	48.3939	1.42804	1.63957	10.8707	64.5883	4.61427	1.60863	10.6692	65.6098	4.49871
0.5	Rendering 1	dataset09.01.2023	sieć mobilna A	MobileNet V3 Small	224	#NAME?	2	Gaussian noise (strength 0.1)	650	0	0	0	115	0	0	115	0	Tak	PiecewiseConstantDecay	RMSprop	1e-05	decay_steps=100000, decay_rate=0.96,	Nie	0.92691	5.37342	59.5292	1.48203	1.67363	10.74	69.3174	4.46722	1.53591	9.87829	62.6738	3.94824	0.886326	5.3308	58.57	1.30282	1.63546	10.7492	62.0398	4.55514	1.61666	10.621	63.6038	4.34521
0.5	Rendering 1	dataset09.01.2023	sieć mobilna A	MobileNet V3 Small	224	#NAME?	2	Gaussian noise (strength 0.1)	650	0	5000	0	115	0	0	115	0	Tak	PiecewiseConstantDecay	RMSprop	0.001	decay_steps=100000, decay_rate=0.96,	Nie	0.196121	1.86502	9.74385	0.0902217	1.13536	8.27325	58.454	2.11523	1.04071	7.64809	49.2745	1.95207	0.180265	1.7193	8.9273	0.0778318	1.22488	8.9764	51.9121	2.56308	1.24587	8.98951	56.6505	2.54414
0.5	Rendering 1	dataset09.01.2023	sieć mobilna A	MobileNet V3 Small	224	#NAME?	2	Gaussian noise (strength 0.1)	650	0	2500	0	115	0	0	115	0	Tak	PiecewiseConstantDecay	RMSprop	0.001	decay_steps=100000, decay_rate=0.96,	Nie	0.269573	2.46409	13.7991	0.153336	0.998764	7.34213	75.9909	1.60683	0.948096	6.99665	73.2938	1.57869	0.247653	2.28825	12.6178	0.131095	1.00793	7.66611	63.4685	1.7244	1.01664	7.61881	70.8004	1.77609
0.5	Rendering 1	dataset09.01.2023	sieć mobilna A	MobileNet V3 Small	224	#NAME?	2	Gaussian noise (strength 0.1)	650	0	0	0	115	0	0	115	0	Tak	PiecewiseConstantDecay	RMSprop	0.001	decay_steps=100000, decay_rate=0.96,	Nie	0.34054	2.21264	22.8514	0.210741	1.26459	9.01917	57.7708	2.74853	1.21641	8.57681	56.0226	2.70131	0.332549	2.23509	22.307	0.207977	1.33982	9.64714	54.5057	3.28546	1.37009	9.72166	55.4387	3.33671
0.5	Rendering 1	dataset09.01.2023	sieć mobilna A	MobileNet V3 Small	224		2	Gaussian noise (strength 0.1)	650	0	5000	0	115	0	0	115	0	Nie	PiecewiseConstantDecay	RMSprop		decay_steps=100000, decay_rate=0.96,	Tak	0.382697	3.52176	19.3422	0.328127	1.23063	7.73477	78.7627	2.69611	1.58846	10.8927	81.7097	4.1712	0.369492	3.41799	18.6027	0.307768	1.41928	9.2925	73.9365	3.47045	1.46172	9.57313	94.386	3.72205
0.5	Rendering 1	dataset09.01.2023	sieć mobilna A	MobileNet V3 Small	224		2	Gaussian noise (strength 0.1)	650	0	2500	0	115	0	0	115	0	Nie	PiecewiseConstantDecay	RMSprop		decay_steps=100000, decay_rate=0.96,	Tak	0.450132	3.98528	23.9049	0.425559	0.975531	6.55542	60.1297	1.83038	1.31971	9.62125	63.5236	2.97405	0.436354	3.88732	23.1348	0.405002	1.14784	8.01459	56.9217	2.38404	1.26596	8.65569	70.7342	3.02575
0.5	Rendering 1	dataset09.01.2023	sieć mobilna A	MobileNet V3 Small	224		2	Gaussian noise (strength 0.1)	650	0	0	0	115	0	0	115	0	Nie	PiecewiseConstantDecay	RMSprop		decay_steps=100000, decay_rate=0.96,	Tak	0.476863	3.05004	32.2915	0.395697	1.07524	6.98806	68.1117	2.03349	1.27229	9.1801	69.4513	2.8158	0.493984	3.12831	33.3408	0.439809	1.14865	7.92213	58.63	2.34329	1.18679	8.17531	64.0074	2.64589
0.5	Rendering 1	dataset09.01.2023	sieć mobilna A	MobileNet V3 Small	224		2	Gaussian noise (strength 0.1)	650	0	5000	0	115	0	0	115	0	Nie	PiecewiseConstantDecay	RMSprop		decay_steps=100000, decay_rate=0.96,	Tak	0.0809958	0.770997	4.05348	0.0157522	0.749914	5.31287	54.1992	1.11932	0.933245	7.36787	50.0921	1.59762	0.0669809	0.641909	3.30501	0.011633	0.818226	6.15803	48.957	1.30846	0.831115	6.32203	46.647	1.38787
0.5	Rendering 1	dataset09.01.2023	sieć mobilna A	MobileNet V3 Small	224		2	Gaussian noise (strength 0.1)	650	0	2500	0	115	0	0	115	0	Nie	PiecewiseConstantDecay	RMSprop		decay_steps=100000, decay_rate=0.96,	Tak	0.10428	0.978986	5.29266	0.0264022	0.935693	6.23324	82.005	1.5282	1.10285	8.38071	64.5769	2.11398	0.0801639	0.756262	4.03412	0.0180342	0.93156	6.85943	49.3431	1.71424	0.998363	7.25112	60.8679	1.94932
0.5	Rendering 1	dataset09.01.2023	sieć mobilna A	MobileNet V3 Small	224		2	Gaussian noise (strength 0.1)	650	0	0	0	115	0	0	115	0	Nie	PiecewiseConstantDecay	RMSprop		decay_steps=100000, decay_rate=0.96,	Tak	0.115551	0.755542	8.00116	0.0229443	1.20779	7.64387	52.0142	2.83954	1.64351	11.2047	60.0809	4.49906	0.106611	0.725454	7.07714	0.020373	1.28638	8.75587	51.9183	3.0452	1.25369	8.7067	51.582	3.18872
0.5	Rendering 1	dataset09.01.2023	sieć mobilna A	MobileNet V3 Small	224		2	Gaussian noise (strength 0.1)	650	0	2500	0	115	0	0	115	0	Tak	CosineDecay	RMSprop	1		Tak	0.815	6.917	40.6	1.343	1.319	8.972	69.18	2.955	1.286	8.824	67.476	2.94	0.809	6.826	40.688	1.325	1.474	9.574	68.853	3.899	1.408	9.274	66.472	3.705
0.5	Rendering 1	dataset09.01.2023	sieć mobilna A	MobileNet V3 Small	224		2	Gaussian noise (strength 0.1)	650	0	0	0	115	0	0	115	0	Tak	CosineDecay	RMSprop	1		Tak	0.625	4.013	39.222	0.741	1.288	8.801	63.307	3.074	1.279	8.793	63.898	2.975	0.609	3.919	38.518	0.681	1.369	9.165	60.347	3.422	1.307	8.876	58.108	3.258
0.5	Rendering 1	dataset09.01.2023	sieć mobilna A	MobileNet V3 Small	224		2	Gaussian noise (strength 0.1)	650	0	5000	0	115	0	0	115	0	Tak	CosineDecay	RMSprop	1		Nie	0.276	2.591	13.853	0.16	0.752	5.885	50.471	1.091	0.745	5.829	45.547	1.105	0.277	2.603	13.926	0.164	0.749	5.636	44.318	1.076	0.727	5.591	44.4	1.024
0.5	Rendering 1	dataset09.01.2023	sieć mobilna A	MobileNet V3 Small	224		2	Gaussian noise (strength 0.1)	650	0	2500	0	115	0	0	115	0	Tak	CosineDecay	RMSprop	1		Nie	0.261	2.41	13.261	0.148	1.042	7.467	87.291	1.847	0.979	7.063	86.666	1.679	0.259	2.376	13.099	0.151	1.218	8.486	55.09	2.691	1.197	8.338	52.541	2.655
0.5	Rendering 1	dataset09.01.2023	sieć mobilna A	MobileNet V3 Small	224		2	Gaussian noise (strength 0.1)	650	0	0	0	115	0	0	115	0	Tak	CosineDecay	RMSprop	1		Nie	0.285	1.956	18.588	0.149	1.162	8.323	50.864	2.635	1.134	8.227	49.576	2.575	0.233	1.603	15.184	0.101	1.188	8.379	49.379	2.571	1.158	8.154	49.499	2.426
0.5	Rendering 1	dataset09.01.2023	sieć mobilna A	MobileNet V3 Small	224	2	2	Gaussian noise (strength 0.1)	650	0	5000	0	115	0	0	115	0	Tak	ExponentialDecay	RMSprop				0.457329	4.19888	23.3943	0.428481	0.800962	5.86344	62.2531	1.04722	0.827401	5.90159	72.0063	1.04901	0.343582	3.17689	17.7537	0.241588	0.806087	6.0852	50.7158	1.25207	0.813868	6.06578	52.5556	1.19705
0.5	Rendering 1	dataset09.01.2023	sieć mobilna A	MobileNet V3 Small	224	2	2	Gaussian noise (strength 0.1)	650	0	2500	0	115	0	0	115	0	Tak	ExponentialDecay	RMSprop				0.519016	4.70954	26.9981	0.55659	1.09713	7.93668	46.6075	2.1722	1.07123	7.71322	47.3963	2.08306	0.403545	3.66037	20.543	0.344978	0.821981	6.23983	53.5289	1.18372	0.909612	6.72832	62.634	1.42518
0.5	Rendering 1	dataset09.01.2023	sieć mobilna A	MobileNet V3 Small	224	2	2	Gaussian noise (strength 0.1)	650	0	0	0	115	0	0	115	0	Tak	ExponentialDecay	RMSprop				0.68049	4.39197	46.3698	0.816973	1.05378	7.5844	63.8761	1.91113	1.02115	7.32905	66.1732	1.83727	0.398483	2.5847	26.8303	0.278829	1.12306	8.1266	50.1434	2.36555	1.11777	8.04249	53.032	2.40391
0.5	Rendering 1	dataset09.01.2023	sieć mobilna A	MobileNet V3 Small	224	2	2	Gaussian noise (strength 0.1)	650	0	5000	0	115	0	0	115	0	Tak	ExponentialDecay	RMSprop				2.38296	15.0873	91.14	8.45625	1.95187	11.4801	70.8567	5.91301	1.90334	11.1434	70.3417	5.70964	2.39146	15.1109	90.6164	8.51467	1.94116	11.5403	70.9301	5.9463	1.88499	11.2338	70.1625	5.81299
0.5	Rendering 1	dataset09.01.2023	sieć mobilna A	MobileNet V3 Small	224	2	2	Gaussian noise (strength 0.1)	650	0	2500	0	115	0	0	115	0	Tak	ExponentialDecay	RMSprop				2.29371	14.5447	90.0762	7.9566	1.90173	11.3337	69.6336	5.68952	1.85422	10.9999	69.2719	5.49198	2.29492	14.5482	90.041	7.96423	1.91576	11.4662	70.2887	5.83481	1.86268	11.1686	69.9096	5.70634
0.5	Rendering 1	dataset09.01.2023	sieć mobilna A	MobileNet V3 Small	224	2	2	Gaussian noise (strength 0.1)	650	0	0	0	115	0	0	115	0	Tak	ExponentialDecay	RMSprop				2.29519	9.62626	96.4825	6.59707	1628.84	2732665	38941184	2721474	1654.1	2.81001e+06	43597460	2.79891e+06	2.13413	9.48097	86.2474	5.78999	2.47227	12.7699	86.4899	8.41782	2.39063	12.4003	84.0272	8.19198
0.5	Rendering 1	dataset09.01.2023	sieć mobilna A	MobileNet V3 Small	224	2	3	hue	650	0	5000	0	115	0	0	115	0	Tak	CosineDecay	Adam	1e-05			0.797364	6.79929	41.3233	1.20072	1.29423	9.01047	72.5792	2.87763	1.12249	7.52917	58.1304	2.30337	0.799161	6.86934	40.8581	1.24498	1.21195	8.58329	64.4287	2.88209	1.11503	7.50866	66.7742	2.30779
0.5	Rendering 1	dataset09.01.2023	sieć mobilna A	MobileNet V3 Small	224	2	3	hue	650	0	2500	0	115	0	0	115	0	Tak	CosineDecay	Adam	1e-05			0.917509	7.25115	48.5429	1.59673	1.17105	8.13163	58.077	2.35484	1.17653	8.28881	55.5367	2.40467	0.899294	7.15685	48.341	1.50774	1.23125	8.82553	57.7887	2.63849	1.23465	8.83229	58.5355	2.78451
0.5	Rendering 1	dataset09.01.2023	sieć mobilna A	MobileNet V3 Small	224	2	3	hue	650	0	0	0	115	0	0	115	0	Tak	CosineDecay	Adam	1e-05			1.01182	6.0104	65.2854	1.72141	1.56689	9.63815	64.0743	4.13324	1.64637	10.0866	65.6442	4.28626	0.989359	5.86957	63.4592	1.60843	1.68951	10.5793	70.0677	4.65928	1.56528	10.1704	61.6265	4.46625
0.5	Rendering 1	dataset09.01.2023	sieć mobilna A	MobileNet V3 Small	224	2	3	hue	650	0	5000	0	115	0	0	115	0	Tak	CosineDecay	Adam	0.001			0.285316	2.65764	14.4293	0.166151	0.984713	7.3754	48.1811	1.7835	0.826747	5.81115	47.4135	1.15952	0.26248	2.44782	13.3148	0.144991	0.957164	7.21486	49.6482	1.73147	0.807079	5.81031	45.2778	1.25959
0.5	Rendering 1	dataset09.01.2023	sieć mobilna A	MobileNet V3 Small	224	2	3	hue	650	0	2500	0	115	0	0	115	0	Tak	CosineDecay	Adam	0.001			0.314161	2.79083	16.6014	0.204533	0.944552	6.94272	41.8173	1.71219	0.962711	7.08342	43.6253	1.69729	0.306716	2.74803	15.9755	0.195646	1.02806	7.69158	44.9396	1.91987	1.05819	7.77896	45.7786	2.02927
0.5	Rendering 1	dataset09.01.2023	sieć mobilna A	MobileNet V3 Small	224	2	3	hue	650	0	0	0	115	0	0	115	0	Tak	CosineDecay	Adam	0.001			0.472909	3.07349	30.9402	0.401052	0.81312	6.13025	49.6007	1.21466	0.794706	6.12651	46.7663	1.16622	0.41964	2.75616	27.6347	0.320705	1.07414	8.03804	43.5999	2.22878	1.0974	8.10245	46.442	2.36659
0.5	Rendering 1	dataset09.01.2023	sieć mobilna A	MobileNet V3 Small	224	2	3	hue	650	0	5000	0	115	0	0	115	0	Tak	PiecewiseConstantDecay	Adam		decay_steps=100000, decay_rate=0.96,	Tak	0.738118	6.34535	38.275	1.05133	1.44278	9.7887	63.7396	3.41854	1.33143	9.09659	56.4761	3.26475	0.709336	6.08546	36.5925	0.985548	1.36142	9.63577	57.5873	3.26031	1.41898	9.81756	57.6439	3.56466
0.5	Rendering 1	dataset09.01.2023	sieć mobilna A	MobileNet V3 Small	224	2	3	hue	650	0	2500	0	115	0	0	115	0	Tak	PiecewiseConstantDecay	Adam		decay_steps=100000, decay_rate=0.96,	Tak	0.896659	7.11142	47.9862	1.52807	1.43221	9.72843	73.5365	3.21505	1.35396	9.21205	68.6309	3.22983	0.903397	7.19902	48.8178	1.51808	1.36353	9.66351	63.9223	3.16481	1.40772	9.72747	64.77	3.36555
0.5	Rendering 1	dataset09.01.2023	sieć mobilna A	MobileNet V3 Small	224	2	3	hue	650	0	0	0	115	0	0	115	0	Tak	PiecewiseConstantDecay	Adam		decay_steps=100000, decay_rate=0.96,	Tak	0.937829	5.5775	62.154	1.50511	1.60261	10.423	64.8427	4.23049	1.48845	9.62451	60.9016	3.86581	0.925489	5.53455	60.6827	1.41447	1.66284	10.8726	61.9452	4.69547	1.57492	10.4347	61.2015	4.24669
0.5	Rendering 1	dataset09.01.2023	sieć mobilna A	MobileNet V3 Small	224	2	3	hue	650	0	5000	0	115	0	0	115	0	Tak	PiecewiseConstantDecay	Adam		decay_steps=100000, decay_rate=0.96,	Nie	0.304076	2.80743	15.4713	0.193989	1.22659	8.7814	50.4143	2.61826	1.14095	8.14712	49.6426	2.46099	0.281822	2.62457	14.123	0.169988	1.22052	8.91215	50.6021	2.64933	1.22972	8.85732	50.9325	2.68145
0.5	Rendering 1	dataset09.01.2023	sieć mobilna A	MobileNet V3 Small	224	2	3	hue	650	0	2500	0	115	0	0	115	0	Tak	PiecewiseConstantDecay	Adam		decay_steps=100000, decay_rate=0.96,	Nie	0.314193	2.83926	16.1866	0.201857	1.12699	8.19746	47.4649	2.23083	1.02618	7.45758	44.5585	1.98345	0.29383	2.64982	15.2681	0.178733	1.13265	8.33086	47.9941	2.27898	1.11895	8.13078	48.2728	2.14184
0.5	Rendering 1	dataset09.01.2023	sieć mobilna A	MobileNet V3 Small	224	2	3	hue	650	0	0	0	115	0	0	115	0	Tak	PiecewiseConstantDecay	Adam		decay_steps=100000, decay_rate=0.96,	Nie	0.408961	2.76309	26.1364	0.326369	0.820134	6.30572	38.9689	1.48713	0.956813	7.58673	42.0489	1.76062	0.406274	2.66677	27.0792	0.293563	1.11671	8.02833	46.2381	2.34709	1.17348	8.3213	49.7573	2.23024
0.5	Rendering 1	dataset09.01.2023	sieć mobilna A	MobileNet V3 Small	224	2	3	hue	650	0	5000	0	115	0	0	115	0	Nie	PiecewiseConstantDecay	Adam		decay_steps=100000, decay_rate=0.96,	Tak	0.292	1.875	21.504	0.145	1.158	8.13	91.929	2.073	1.162	8.674	79.277	2.293	0.263	1.679	19.156	0.122	1.243	8.611	87.184	2.355	1.116	7.216	94.805	2.027
0.5	Rendering 1	dataset09.01.2023	sieć mobilna A	MobileNet V3 Small	224	2	3	hue	650	0	2500	0	115	0	0	115	0	Nie	PiecewiseConstantDecay	Adam		decay_steps=100000, decay_rate=0.96,	Tak	0.057	0.554	2.838	0.007	0.655	4.903	55.031	0.774	0.775	5.992	63.158	0.996	0.042	0.399	2.085	0.004	0.662	5.034	53.074	0.806	0.623	4.356	61.397	0.751
0.5	Rendering 1	dataset09.01.2023	sieć mobilna A	MobileNet V3 Small	224	2	3	hue	650	0	0	0	115	0	0	115	0	Nie	PiecewiseConstantDecay	Adam		decay_steps=100000, decay_rate=0.96,	Tak	0.072	0.659	3.837	0.011	0.568	4.42	38.539	0.658	0.696	5.632	44.666	0.935	0.052	0.475	2.761	0.006	0.56	4.378	37.692	0.641	0.518	3.71	43.444	0.525
0.5	Rendering 1	dataset09.01.2023	sieć mobilna A	MobileNet V3 Small	224	2	3	hue	650	0	5000	0	115	0	0	115	0	Nie	PiecewiseConstantDecay	Adam		decay_steps=100000, decay_rate=0.96,	Nie	0.091	0.624	6.204	0.015	1.131	8.13	47.006	2.49	1.261	9.305	48.835	3.004	0.068	0.467	4.548	0.008	1.117	8.015	48.225	2.264	0.945	6.43	47.785	1.761
0.5	Rendering 1	dataset09.01.2023	sieć mobilna A	MobileNet V3 Small	224	2	3	hue	650	0	2500	0	115	0	0	115	0	Nie	PiecewiseConstantDecay	Adam		decay_steps=100000, decay_rate=0.96,	Nie	0.295	2.7	15.379	0.181	0.946	6.755	70.966	1.561	1.084	8.038	71.855	1.96	0.293	2.701	15.284	0.186	0.985	7.107	69.876	1.695	0.95	6.187	92.222	1.501
0.5	Rendering 1	dataset09.01.2023	sieć mobilna A	MobileNet V3 Small	224	2	3	hue	650	0	0	0	115	0	0	115	0	Nie	PiecewiseConstantDecay	Adam		decay_steps=100000, decay_rate=0.96,	Nie	0.481	4.171	25.721	0.476	0.971	6.926	78.201	1.656	1.051	7.807	70.035	1.913	0.437	3.801	24.016	0.384	1.042	7.4	75.596	1.993	0.929	6.217	90.5	1.539
0.5	Rendering 1	dataset09.01.2023	sieć mobilna A	MobileNet V3 Small	224	2	3	hue	650	0	5000	0	115	0	0	115	0	Tak	CosineDecay	RMSprop	1e-05			0.661297	5.69608	35.7067	0.832603	0.922964	6.36421	81.068	1.51747	1.00863	7.53967	71.5197	1.79279	0.657439	5.71273	34.4817	0.837855	1.02844	7.31644	80.9231	1.70321	0.964179	6.69144	81.7348	1.57216
0.5	Rendering 1	dataset09.01.2023	sieć mobilna A	MobileNet V3 Small	224	2	3	hue	650	0	2500	0	115	0	0	115	0	Tak	CosineDecay	RMSprop	1e-05			0.771617	6.44732	41.6814	1.11581	0.996709	6.7466	59.4253	1.94866	1.13463	8.24118	54.2044	2.40096	0.765305	6.38885	41.5554	1.08715	1.12809	7.8213	65.963	2.25025	1.10536	7.59472	57.2982	2.23768
0.5	Rendering 1	dataset09.01.2023	sieć mobilna A	MobileNet V3 Small	224	2	3	hue	650	0	0	0	115	0	0	115	0	Tak	CosineDecay	RMSprop	1e-05			0.873254	5.31581	57.7992	1.25833	1.30351	8.08146	60.359	2.92654	1.49214	9.80217	62.7341	3.59224	0.782794	4.72815	54.4901	1.04983	1.4145	8.89592	62.5028	3.19934	1.49233	9.19979	64.2281	3.61301
0.5	Rendering 1	dataset09.01.2023	sieć mobilna A	MobileNet V3 Small	224	2	3	hue	650	0	5000	0	115	0	0	115	0	Tak	CosineDecay	RMSprop	0.001			0.209618	1.98054	10.4002	0.0951269	0.542871	3.97679	39.5084	0.512729	0.574896	4.46023	38.6411	0.574223	0.196638	1.84905	9.87076	0.08197	0.564414	4.35185	35.9188	0.590377	0.521504	3.9094	36.8608	0.53189
0.5	Rendering 1	dataset09.01.2023	sieć mobilna A	MobileNet V3 Small	224	2	3	hue	650	0	2500	0	115	0	0	115	0	Tak	CosineDecay	RMSprop	0.001			0.241194	2.20124	12.5838	0.117923	0.651948	4.64911	55.3223	0.713596	0.674653	5.20366	49.585	0.740267	0.222428	2.0299	11.5138	0.102523	0.633274	4.69031	47.7763	0.644927	0.601035	4.42943	47.3123	0.632522
0.5	Rendering 1	dataset09.01.2023	sieć mobilna A	MobileNet V3 Small	224	2	3	hue	650	0	0	0	115	0	0	115	0	Tak	CosineDecay	RMSprop	0.001			0.31178	2.05776	20.6155	0.166953	0.88003	6.19732	51.7386	1.52714	1.00977	7.63018	49.0993	2.02689	0.302672	2.01342	19.8928	0.166928	1.08649	7.75564	47.5307	2.26961	1.10407	7.76441	47.203	2.38676
0.5	Rendering 1	dataset09.01.2023	sieć mobilna A	MobileNet V3 Small	224	2	3	hue	650	0	5000	0	115	0	0	115	0	Tak	PiecewiseConstantDecay	RMSprop		decay_steps=100000, decay_rate=0.96,	Tak	0.679774	5.90586	35.7195	0.892778	1.24075	8.78821	67.1448	2.73652	1.17462	8.36463	63.7453	2.53897	0.647654	5.61493	34.6434	0.806321	1.20918	8.87046	58.7867	2.79262	1.2227	8.87233	62.8201	2.75412
0.5	Rendering 1	dataset09.01.2023	sieć mobilna A	MobileNet V3 Small	224	2	3	hue	650	0	2500	0	115	0	0	115	0	Tak	PiecewiseConstantDecay	RMSprop		decay_steps=100000, decay_rate=0.96,	Tak	0.81777	6.73214	44.0361	1.25132	1.11988	8.04797	72.488	2.19661	1.08365	7.85495	70.6256	2.2135	0.790739	6.54986	43.0173	1.19091	1.143	8.5174	55.9191	2.45072	1.10781	8.25756	56.8656	2.36192
0.5	Rendering 1	dataset09.01.2023	sieć mobilna A	MobileNet V3 Small	224	2	3	hue	650	0	0	0	115	0	0	115	0	Tak	PiecewiseConstantDecay	RMSprop		decay_steps=100000, decay_rate=0.96,	Tak	0.947389	5.46474	63.4111	1.39714	1.78753	10.9487	71.8921	4.77761	1.69328	10.237	67.868	4.4529	1.02615	6.16788	74.0195	1.70535	1.79793	11.2172	68.0558	5.05745	1.74716	10.9526	67.2728	5.01103
0.5	Rendering 1	dataset09.01.2023	sieć mobilna A	MobileNet V3 Small	224	2	3	hue	650	0	5000	0	115	0	0	115	0	Tak	PiecewiseConstantDecay	RMSprop		decay_steps=100000, decay_rate=0.96,	Nie	0.218466	2.06965	10.7834	0.105078	0.596662	4.54635	46.4963	0.632141	0.610388	4.68907	44.749	0.708279	0.205133	1.9445	10.2003	0.0917893	0.670194	5.28657	43.5839	0.807759	0.67685	5.30356	47.9708	0.853878
0.5	Rendering 1	dataset09.01.2023	sieć mobilna A	MobileNet V3 Small	224	2	3	hue	650	0	2500	0	115	0	0	115	0	Tak	PiecewiseConstantDecay	RMSprop		decay_steps=100000, decay_rate=0.96,	Nie	0.23849	2.15851	12.4197	0.116879	0.673759	5.33648	41.7301	0.813061	0.656463	5.19336	40.027	0.850301	0.220197	2.03109	11.3377	0.103786	0.656881	5.272	37.6836	0.846387	0.689473	5.55235	39.1206	0.903169
0.5	Rendering 1	dataset09.01.2023	sieć mobilna A	MobileNet V3 Small	224	2	3	hue	650	0	0	0	115	0	0	115	0	Tak	PiecewiseConstantDecay	RMSprop		decay_steps=100000, decay_rate=0.96,	Nie	0.318158	2.16967	20.6027	0.185197	1.03516	7.62215	54.5473	2.12856	1.13945	8.76328	50.967	2.35895	0.281984	1.93206	18.3428	0.147554	1.11541	8.15055	47.673	2.46939	1.19244	8.58235	50.7496	2.52605
0.5	Rendering 1	dataset09.01.2023	sieć mobilna A	MobileNet V3 Small	224	2	3	hue	650	0	5000	0	115	0	0	115	0	Nie	PiecewiseConstantDecay	RMSprop		decay_steps=100000, decay_rate=0.96,	Tak	0.3	1.967	20.404	0.157	1.213	8.165	59.796	2.708	1.382	9.559	65.038	3.233	0.289	1.879	20.26	0.149	1.143	7.832	56.537	2.202	1.162	7.226	75.912	2.242
0.5	Rendering 1	dataset09.01.2023	sieć mobilna A	MobileNet V3 Small	224	2	3	hue	650	0	2500	0	115	0	0	115	0	Nie	PiecewiseConstantDecay	RMSprop		decay_steps=100000, decay_rate=0.96,	Tak	0.099	0.907	5.184	0.02	0.875	6.385	68.93	1.387	0.971	7.414	64.949	1.626	0.085	0.788	4.41	0.016	0.864	6.336	67.286	1.362	0.826	5.607	79.632	1.188
0.5	Rendering 1	dataset09.01.2023	sieć mobilna A	MobileNet V3 Small	224	2	3	hue	650	0	0	0	115	0	0	115	0	Nie	PiecewiseConstantDecay	RMSprop		decay_steps=100000, decay_rate=0.96,	Tak	0.123	1.107	6.563	0.033	0.867	6.425	57.193	1.398	0.903	7.107	52.065	1.565	0.099	0.916	5.173	0.021	0.823	6.145	51.234	1.257	0.74	5.121	58.15	1.016
0.5	Rendering 1	dataset09.01.2023	sieć mobilna A	MobileNet V3 Small	224	2	3	hue	650	0	5000	0	115	0	0	115	0	Nie	PiecewiseConstantDecay	RMSprop		decay_steps=100000, decay_rate=0.96,	Nie	0.145	0.973	9.664	0.041	1.032	7.501	48.81	2.134	1.151	8.564	53.56	2.479	0.132	0.897	8.74	0.033	1.029	7.39	49.051	1.864	0.901	6.087	50.946	1.57
0.5	Rendering 1	dataset09.01.2023	sieć mobilna A	MobileNet V3 Small	224	2	3	hue	650	0	2500	0	115	0	0	115	0	Nie	PiecewiseConstantDecay	RMSprop		decay_steps=100000, decay_rate=0.96,	Nie	0.235	2.156	12.22	0.117	1.02	7.288	87.564	1.639	1.017	7.739	75.657	1.677	0.229	2.1	11.917	0.113	0.955	7.07	79.613	1.475	0.953	6.403	100.959	1.514
0.5	Rendering 1	dataset09.01.2023	sieć mobilna A	MobileNet V3 Small	224	2	3	hue	650	0	0	0	115	0	0	115	0	Nie	PiecewiseConstantDecay	RMSprop		decay_steps=100000, decay_rate=0.96,	Nie	0.269	2.426	14.379	0.149	0.943	6.821	89.799	1.574	1.043	7.806	95.674	1.797	0.275	2.444	14.911	0.151	0.875	6.323	75.368	1.335	0.909	6.052	102.906	1.383
0.5	Rendering 1	dataset09.01.2023	sieć mobilna A	MobileNet V3 Small	224	3		Rotation	650	0	5000	0	115	0	0	115	0	Nie	PiecewiseConstantDecay	Adam	1e-05			0.629873	5.49468	31.3348	0.828939	1.49272	8.93188	60.1783	3.81971	1.71424	10.7742	64.5099	4.74716	0.662066	5.76632	32.3292	0.942537	1.60236	9.88667	61.4524	4.34842	1.58817	9.69829	62.1425	4.32264
0.5	Rendering 1	dataset09.01.2023	sieć mobilna A	MobileNet V3 Small	224	3		Rotation	650	0	2500	0	115	0	0	115	0	Nie	PiecewiseConstantDecay	Adam	1e-05			0.815141	6.80341	40.0635	1.34183	1.55555	9.17459	62.9137	4.19835	1.74574	10.8202	66.793	4.9815	0.824081	6.84672	39.8916	1.37386	1.71853	10.2767	69.3339	4.7954	1.71024	10.0823	68.9681	4.84983
0.5	Rendering 1	dataset09.01.2023	sieć mobilna A	MobileNet V3 Small	224	3		Rotation	650	0	0	0	115	0	0	115	0	Nie	PiecewiseConstantDecay	Adam	1e-05			1.37476	7.15986	82.5347	2.98683	1.36572	9.21013	59.3987	3.37832	1.29382	8.85056	58.1989	3.104	1.25421	6.72528	82.2466	2.55866	1.5724	10.2665	68.8268	4.1059	1.28703	8.03456	65.0389	2.89377
0.5	Rendering 1	dataset09.01.2023	sieć mobilna A	MobileNet V3 Small	224	3		Rotation	650	0	5000	0	115	0	0	115	0	Nie	PiecewiseConstantDecay	Adam	0.001			0.290443	2.72182	14.3162	0.199092	1.74525	10.9201	66.7411	4.65195	1.82395	11.2697	69.4851	4.77331	0.257423	2.42232	12.7622	0.1565	1.6506	10.2086	65.9126	4.0383	1.58582	9.75964	63.2406	4.08831
0.5	Rendering 1	dataset09.01.2023	sieć mobilna A	MobileNet V3 Small	224	3		Rotation	650	0	2500	0	115	0	0	115	0	Nie	PiecewiseConstantDecay	Adam	0.001			0.382156	3.47385	18.7747	0.339179	1.62278	10.3766	64.0439	4.13099	1.43548	8.77177	62.7013	3.22355	0.348536	3.16499	17.4608	0.276767	1.51142	9.82062	61.495	3.80176	1.43639	8.7417	62.6006	3.24092
0.5	Rendering 1	dataset09.01.2023	sieć mobilna A	MobileNet V3 Small	224	3		Rotation	650	0	0	0	115	0	0	115	0	Nie	PiecewiseConstantDecay	Adam	0.001			0.453388	3.03572	28.5414	0.440306	1.53539	10.2247	58.4527	3.87328	1.34474	8.57211	55.6767	3.00853	0.463326	3.10701	28.8115	0.436958	1.48483	9.94111	60.3604	3.88238	1.34601	8.59916	56.3864	3.10135
0.5	Rendering 1	dataset09.01.2023	sieć mobilna A	MobileNet V3 Small	224	3		Rotation	650	0	5000	0	115	0	0	115	0	Nie	PiecewiseConstantDecay	RMSprop	1e-05			0.588949	5.21143	29.6047	0.749462	1.33322	8.36313	60.7402	3.22277	1.44343	9.67237	61.1532	3.71508	0.582735	5.16811	29.3511	0.726778	1.37707	9.0465	59.5859	3.37227	1.3178	8.6175	58.5144	3.20194
0.5	Rendering 1	dataset09.01.2023	sieć mobilna A	MobileNet V3 Small	224	3		Rotation	650	0	2500	0	115	0	0	115	0	Nie	PiecewiseConstantDecay	RMSprop	1e-05			0.697209	5.8625	36.0548	0.997093	1.39496	8.49637	59.5122	3.60985	1.54813	9.91697	61.9496	4.12678	0.718864	6.05266	37.1958	1.05239	1.46765	9.23959	60.8298	3.73262	1.45764	9.06446	61.2115	3.72352
0.5	Rendering 1	dataset09.01.2023	sieć mobilna A	MobileNet V3 Small	224	3		Rotation	650	0	0	0	115	0	0	115	0	Nie	PiecewiseConstantDecay	RMSprop	1e-05			0.754878	4.74926	48.4642	0.988398	1.09772	7.36155	76.321	2.15071	1.12571	8.22414	59.2622	2.29341	0.712038	4.4662	46.9487	0.877248	1.28929	8.60501	71.0099	2.85578	1.35761	8.92799	79.4307	3.08057
0.5	Rendering 1	dataset09.01.2023	sieć mobilna A	MobileNet V3 Small	224	3		Rotation	650	0	5000	0	115	0	0	115	0	Nie	PiecewiseConstantDecay	RMSprop	0.001			0.210581	2.00834	10.2304	0.119975	0.667607	4.78901	41.6625	0.794696	0.743027	5.68696	39.1838	1.08595	0.193172	1.83679	9.42972	0.0957752	0.658625	4.96692	39.8093	0.919916	0.581039	4.2792	38.0034	0.634593
0.5	Rendering 1	dataset09.01.2023	sieć mobilna A	MobileNet V3 Small	224	3		Rotation	650	0	2500	0	115	0	0	115	0	Nie	PiecewiseConstantDecay	RMSprop	0.001			0.241657	2.22016	12.2732	0.148905	0.869288	6.20495	41.6264	1.51112	0.979704	7.34366	42.5229	1.92822	0.215931	1.99734	10.7789	0.116074	0.879902	6.50754	40.24	1.59634	0.820981	6.03533	39.3634	1.30874
0.5	Rendering 1	dataset09.01.2023	sieć mobilna A	MobileNet V3 Small	224	3		Rotation	650	0	0	0	115	0	0	115	0	Nie	PiecewiseConstantDecay	RMSprop	0.001			0.291477	1.96311	18.4581	0.18666	0.976603	6.62196	75.0021	1.51274	0.985629	7.23917	65.1262	1.59714	0.286338	1.98723	17.6674	0.206508	1.26057	8.48289	56.7927	2.71773	1.21764	8.21159	53.1591	2.64587
0.5	Rendering 1	dataset09.01.2023	sieć mobilna A	MobileNet V3 Small	224	2		Rotation 90° x	650	0	5000	0	115	0	0	115	0	Nie	PiecewiseConstantDecay	Adam	1e-05			0.428883	3.88625	22.2072	0.385561	0.920226	6.15567	78.7125	1.29404	0.9153	6.64718	67.2574	1.33951	0.416977	3.80609	21.3867	0.366834	0.907166	6.3911	79.8501	1.34397	0.877931	6.02048	74.3144	1.23375
0.5	Rendering 1	dataset09.01.2023	sieć mobilna A	MobileNet V3 Small	224	2		Rotation 90° x	650	0	2500	0	115	0	0	115	0	Nie	PiecewiseConstantDecay	Adam	1e-05			0.470423	4.229	24.1853	0.471561	0.955677	6.62912	92.1094	1.38492	1.04652	7.73676	83.5552	1.64283	0.452168	4.05399	22.7984	0.441993	1.02133	7.24357	84.1137	1.61131	0.979421	6.81984	76.0789	1.51615
0.5	Rendering 1	dataset09.01.2023	sieć mobilna A	MobileNet V3 Small	224	2		Rotation 90° x	650	0	0	0	115	0	0	115	0	Nie	PiecewiseConstantDecay	Adam	1e-05			0.439165	2.9784	27.1922	0.372457	0.996966	6.57504	55.0181	1.83869	1.18124	8.21109	58.4325	2.54396	0.441761	3.03871	28.8641	0.400768	1.07715	7.27275	59.9372	1.89855	1.1371	7.48252	61.9699	2.10362
0.5	Rendering 1	dataset09.01.2023	sieć mobilna A	MobileNet V3 Small	224	2		Rotation 90° x	650	0	5000	0	115	0	0	115	0	Nie	PiecewiseConstantDecay	Adam	0.001			0.107934	1.0157	5.49479	0.0262102	0.615185	4.42971	46.489	0.699543	0.67198	5.22276	46.0802	0.775749	0.0846281	0.800364	4.27606	0.0159847	0.651875	4.77535	49.719	0.747764	0.645866	4.76529	47.3034	0.801674
0.5	Rendering 1	dataset09.01.2023	sieć mobilna A	MobileNet V3 Small	224	2		Rotation 90° x	650	0	2500	0	115	0	0	115	0	Nie	PiecewiseConstantDecay	Adam	0.001			0.175684	1.5909	9.33959	0.0652671	0.709629	4.99391	51.7605	0.916684	0.787395	6.05997	45.5237	1.18526	0.135889	1.26159	7.03088	0.0425892	0.774282	5.70051	55.3548	1.05254	0.777585	5.65341	55.9698	1.11168
0.5	Rendering 1	dataset09.01.2023	sieć mobilna A	MobileNet V3 Small	224	2		Rotation 90° x	650	0	0	0	115	0	0	115	0	Nie	PiecewiseConstantDecay	Adam	0.001			0.178141	1.22202	11.4696	0.0624487	0.931691	6.51433	45.6328	1.75845	1.13864	8.28771	48.5359	2.41932	0.180656	1.25286	11.493	0.0684142	0.967551	7.02983	46.1686	1.87428	1.0038	7.11561	47.2068	1.97108
0.5	Rendering 1	dataset09.01.2023	sieć mobilna A	MobileNet V3 Small	224	2		Rotation 90° x	650	0	5000	0	115	0	0	115	0	Nie	PiecewiseConstantDecay	RMSprop	1e-05			0.291438	2.70372	14.8203	0.186922	0.820714	5.48575	83.8556	1.17686	0.925265	6.84872	72.8521	1.48482	0.276643	2.56404	14.0159	0.170958	0.87204	6.06671	83.3343	1.29028	0.861878	5.90702	82.9546	1.3367
0.5	Rendering 1	dataset09.01.2023	sieć mobilna A	MobileNet V3 Small	224	2		Rotation 90° x	650	0	2500	0	115	0	0	115	0	Nie	PiecewiseConstantDecay	RMSprop	1e-05			0.330692	2.99213	17.1986	0.243254	0.841678	5.77649	93.9373	1.25172	1.02251	7.54827	88.2172	1.78992	0.339085	3.06183	17.8662	0.252748	0.911719	6.54735	83.6647	1.45856	0.951174	6.70654	90.2999	1.51568
0.5	Rendering 1	dataset09.01.2023	sieć mobilna A	MobileNet V3 Small	224	2		Rotation 90° x	650	0	0	0	115	0	0	115	0	Nie	PiecewiseConstantDecay	RMSprop	1e-05			0.364264	2.45182	24.48	0.258241	1.01209	6.50669	60.2032	1.73725	1.17714	8.07727	56.4261	2.48847	0.361806	2.37703	24.2154	0.249719	1.07973	6.91601	57.3155	2.03269	1.06456	6.75242	55.4957	1.95277
0.5	Rendering 1	dataset09.01.2023	sieć mobilna A	MobileNet V3 Small	224	2		Rotation 90° x	650	0	5000	0	115	0	0	115	0	Nie	PiecewiseConstantDecay	RMSprop	0.001			0.0729397	0.682767	3.71187	0.0122734	0.459839	3.38829	35.3135	0.453442	0.467101	3.66411	34.7179	0.429533	0.0578786	0.545809	2.9011	0.00770742	0.456751	3.38704	33.2387	0.412844	0.455166	3.47623	36.3715	0.448768
0.5	Rendering 1	dataset09.01.2023	sieć mobilna A	MobileNet V3 Small	224	2		Rotation 90° x	650	0	2500	0	115	0	0	115	0	Nie	PiecewiseConstantDecay	RMSprop	0.001			0.0916423	0.863842	4.64936	0.0196187	0.70097	4.86035	73.4618	0.888211	0.714437	5.27397	67.6482	0.894687	0.0636435	0.587055	3.31424	0.00876886	0.593686	4.26067	53.6186	0.637134	0.664272	4.77739	63.9343	0.81759
0.5	Rendering 1	dataset09.01.2023	sieć mobilna A	MobileNet V3 Small	224	2		Rotation 90° x	650	0	0	0	115	0	0	115	0	Nie	PiecewiseConstantDecay	RMSprop	0.001			0.15213	0.989901	10.682	0.0400187	0.690078	5.09499	42.9632	0.949997	0.808508	6.35213	44.2479	1.31748	0.104031	0.702408	6.89795	0.0190654	0.804108	6.12162	41.5349	1.33782	0.843714	6.27719	42.9378	1.50459
0.5	Rendering 1	dataset09.01.2023	sieć mobilna A	MobileNet V3 Small	224	1		Flip	650	0	5000	0	115	0	0	115	0	Nie	PiecewiseConstantDecay	Adam	1e-05			0.353704	3.23966	18.1337	0.271406	0.885297	6.19545	63.9003	1.35399	0.992707	7.36642	59.6961	1.70783	0.342592	3.149	17.4076	0.249323	0.914393	6.59072	66.5108	1.36568	0.896006	6.37112	64.5925	1.40046
0.5	Rendering 1	dataset09.01.2023	sieć mobilna A	MobileNet V3 Small	224	1		Flip	650	0	2500	0	115	0	0	115	0	Nie	PiecewiseConstantDecay	Adam	1e-05			0.505387	4.45446	26.22	0.537034	0.958943	6.55617	89.0318	1.50062	1.01635	7.51697	78.2726	1.76348	0.494921	4.32773	26.0128	0.502576	0.938909	6.69615	83.6043	1.538	0.977535	6.81804	85.3129	1.64028
0.5	Rendering 1	dataset09.01.2023	sieć mobilna A	MobileNet V3 Small	224	1		Flip	650	0	0	0	115	0	0	115	0	Nie	PiecewiseConstantDecay	Adam	1e-05			0.416306	2.80488	25.6512	0.349496	0.973187	6.50946	55.2866	1.6699	1.06428	7.66998	49.6237	2.16913	0.380638	2.61061	24.3305	0.288629	1.10439	7.38955	52.1558	2.11206	1.11671	7.38712	61.4861	2.16964
0.5	Rendering 1	dataset09.01.2023	sieć mobilna A	MobileNet V3 Small	224	1		Flip	650	0	5000	0	115	0	0	115	0	Nie	PiecewiseConstantDecay	Adam	0.001			0.144735	1.3765	7.23047	0.0461908	0.737229	5.16908	46.5999	1.04472	0.779073	5.96756	42.2781	1.23912	0.119578	1.15424	5.87334	0.0320418	0.804457	5.83421	51.8141	1.25471	0.79711	5.824	48.2881	1.23733
0.5	Rendering 1	dataset09.01.2023	sieć mobilna A	MobileNet V3 Small	224	1		Flip	650	0	2500	0	115	0	0	115	0	Nie	PiecewiseConstantDecay	Adam	0.001			0.161968	1.46662	8.56063	0.0555832	0.771625	5.38442	56.8208	1.10756	0.866626	6.59597	51.6813	1.41418	0.137438	1.28074	7.02673	0.0420842	0.787745	5.73588	52.3138	1.1521	0.792728	5.68016	53.7401	1.20573
0.5	Rendering 1	dataset09.01.2023	sieć mobilna A	MobileNet V3 Small	224	1		Flip	650	0	0	0	115	0	0	115	0	Nie	PiecewiseConstantDecay	Adam	0.001			0.201759	1.39497	13.0742	0.080876	0.864918	6.01026	48.4539	1.36267	0.99633	7.38749	48.3328	1.80577	0.178152	1.24967	11.3103	0.0691466	0.860755	6.20393	46.6106	1.3044	0.897442	6.38784	46.9538	1.50324
0.5	Rendering 1	dataset09.01.2023	sieć mobilna A	MobileNet V3 Small	224	1		Flip	650	0	5000	0	115	0	0	115	0	Nie	PiecewiseConstantDecay	RMSprop	1e-05			0.3076	2.83636	15.7174	0.200861	0.875889	6.07253	87.7128	1.41032	0.915091	6.89214	80.6967	1.50401	0.30118	2.77011	15.4585	0.188512	0.933697	6.68083	81.4531	1.39686	0.870381	6.13717	86.5379	1.39183
0.5	Rendering 1	dataset09.01.2023	sieć mobilna A	MobileNet V3 Small	224	1		Flip	650	0	2500	0	115	0	0	115	0	Nie	PiecewiseConstantDecay	RMSprop	1e-05			0.381437	3.40034	20.3846	0.299466	0.947802	6.52121	95.8542	1.39786	0.997643	7.44899	80.8172	1.56821	0.398354	3.52451	20.9259	0.326432	0.971726	6.94237	89.8435	1.52362	0.902436	6.35321	81.3159	1.34568
0.5	Rendering 1	dataset09.01.2023	sieć mobilna A	MobileNet V3 Small	224	1		Flip	650	0	0	0	115	0	0	115	0	Nie	PiecewiseConstantDecay	RMSprop	1e-05			0.374259	2.46641	24.661	0.282554	0.992212	6.54759	64.5201	1.73061	1.08497	7.88138	57.148	2.18198	0.350761	2.32638	23.1298	0.23516	1.10933	7.54173	64.113	2.11527	1.04957	7.15648	58.526	2.02746
0.5	Rendering 1	dataset09.01.2023	sieć mobilna A	MobileNet V3 Small	224	1		Flip	650	0	5000	0	115	0	0	115	0	Nie	PiecewiseConstantDecay	RMSprop	0.001			0.0759278	0.722273	3.78953	0.0131251	0.539714	3.98959	46.3724	0.541376	0.591621	4.72733	45.5561	0.61824	0.0590137	0.563669	2.92361	0.00797653	0.554597	4.30678	43.3154	0.556847	0.587634	4.56014	46.7017	0.591365
0.5	Rendering 1	dataset09.01.2023	sieć mobilna A	MobileNet V3 Small	224	1		Flip	650	0	2500	0	115	0	0	115	0	Nie	PiecewiseConstantDecay	RMSprop	0.001			0.0811093	0.739137	4.28932	0.0145603	0.611296	4.623	50.7707	0.66965	0.740662	5.81068	57.8789	0.887095	0.0654083	0.604339	3.38504	0.00963857	0.655136	5.05193	51.4888	0.700759	0.67715	5.26833	55.8903	0.827743
0.5	Rendering 1	dataset09.01.2023	sieć mobilna A	MobileNet V3 Small	224	1		Flip	650	0	0	0	115	0	0	115	0	Nie	PiecewiseConstantDecay	RMSprop	0.001			0.137595	0.91661	9.44625	0.0338355	1.07499	7.29939	50.6826	2.17278	1.26345	9.00945	50.6239	3.00463	0.106228	0.715702	6.96151	0.0201118	1.14621	8.02791	50.3079	2.41698	1.13695	7.89486	48.8333	2.47263
0.5	Rendering 1	dataset09.01.2023	sieć mobilna A	MobileNet V3 Small	224	4		Flip, rotation	650	0	5000	0	115	0	0	115	0	Nie	PiecewiseConstantDecay	Adam	1e-05			0.637295	5.55126	31.5763	0.847089	1.82091	11.2072	68.3977	5.29756	1.96358	11.747	70.6157	5.77433	0.630494	5.47641	31.524	0.826353	1.8176	10.7803	69.1792	5.15255	1.67818	10.0417	65.4871	4.73006
0.5	Rendering 1	dataset09.01.2023	sieć mobilna A	MobileNet V3 Small	224	4		Flip, rotation	650	0	2500	0	115	0	0	115	0	Nie	PiecewiseConstantDecay	Adam	1e-05			1.05496	8.25931	51.6485	2.08853	2.03901	11.9166	73.6071	6.48861	1.85572	10.2762	73.5467	5.33567	1.06084	8.36205	51.5082	2.13483	1.91656	11.423	71.709	6.08001	1.80639	10.1204	71.6489	5.17084
0.5	Rendering 1	dataset09.01.2023	sieć mobilna A	MobileNet V3 Small	224	4		Flip, rotation	650	0	0	0	115	0	0	115	0	Nie	PiecewiseConstantDecay	Adam	1e-05			0.813604	5.01774	49.7795	1.1815	1.73233	10.6478	66.3233	4.76225	1.55063	8.96441	66.1485	3.69411	0.763133	4.69358	49.4774	0.986907	1.61773	10.1216	66.3205	4.23177	1.55882	9.07583	66.6714	3.88797
0.5	Rendering 1	dataset09.01.2023	sieć mobilna A	MobileNet V3 Small	224	4		Flip, rotation	650	0	5000	0	115	0	0	115	0	Nie	PiecewiseConstantDecay	Adam	0.001			0.286857	2.71098	13.8205	0.201917	1.9287	11.5759	72.2941	5.4897	2.01319	11.938	74.9803	5.62482	0.266548	2.50528	12.8085	0.181707	1.87315	10.9759	73.9073	4.97595	1.74867	10.3044	69.8539	4.68259
0.5	Rendering 1	dataset09.01.2023	sieć mobilna A	MobileNet V3 Small	224	4		Flip, rotation	650	0	2500	0	115	0	0	115	0	Nie	PiecewiseConstantDecay	Adam	0.001			0.436049	3.87516	21.961	0.408797	1.63256	10.5259	65.18	4.0333	1.46692	8.98135	63.1394	3.24277	0.368832	3.29449	18.6431	0.297616	1.48346	9.86794	59.5688	3.67286	1.41778	8.83626	60.9803	3.16111
0.5	Rendering 1	dataset09.01.2023	sieć mobilna A	MobileNet V3 Small	224	4		Flip, rotation	650	0	0	0	115	0	0	115	0	Nie	PiecewiseConstantDecay	Adam	0.001			0.394761	2.61629	25.0681	0.331224	1.57422	10.3059	60.7933	4.00325	1.39186	8.73966	58.0795	3.20665	0.396524	2.68669	24.518	0.336537	1.55657	10.2027	60.8682	4.19378	1.47089	8.99663	62.5848	3.46915
0.5	Rendering 1	dataset09.01.2023	sieć mobilna A	MobileNet V3 Small	224	4		Flip, rotation	650	0	5000	0	115	0	0	115	0	Nie	PiecewiseConstantDecay	RMSprop	1e-05			0.572304	5.04638	29.0171	0.703717	1.37746	9.45249	57.9118	3.338	1.43685	9.72498	55.7186	3.56835	0.576628	5.09625	30.0269	0.694867	1.27224	8.62945	55.3298	2.94542	1.27169	8.40723	56.1587	3.06466
0.5	Rendering 1	dataset09.01.2023	sieć mobilna A	MobileNet V3 Small	224	4		Flip, rotation	650	0	2500	0	115	0	0	115	0	Nie	PiecewiseConstantDecay	RMSprop	1e-05			0.689782	5.89135	35.193	0.975952	1.52187	10.0397	60.6646	4.0015	1.40995	8.64542	60.0486	3.53774	0.684251	5.87041	34.9485	0.943207	1.52799	10.022	62.0207	4.19232	1.38249	8.6176	59.3897	3.33667
0.5	Rendering 1	dataset09.01.2023	sieć mobilna A	MobileNet V3 Small	224	4		Flip, rotation	650	0	0	0	115	0	0	115	0	Nie	PiecewiseConstantDecay	RMSprop	1e-05			0.708543	4.43774	44.1912	0.884904	1.25662	8.7892	66.4859	2.87852	1.08518	7.26993	57.176	2.17941	0.691963	4.38079	44.047	0.857723	1.23759	8.78181	58.3429	3.05534	1.17491	7.70461	57.4075	2.62778
0.5	Rendering 1	dataset09.01.2023	sieć mobilna A	MobileNet V3 Small	224	4		Flip, rotation	650	0	2500	0	115	0	0	115	0	Nie	PiecewiseConstantDecay	RMSprop	0.001			0.3779	3.46091	18.7904	0.319064	1.23694	8.68805	51.7313	2.43249	1.0631	7.18369	47.3191	1.87154	0.33105	3.04639	16.3718	0.249295	1.09686	7.81002	48.0152	2.09128	1.01733	6.76342	47.6258	1.68307
0.5	Rendering 1	dataset09.01.2023	sieć mobilna A	MobileNet V3 Small	224	4		Flip, rotation	650	0	5000	0	115	0	0	115	0	Nie	PiecewiseConstantDecay	RMSprop	0.001			0.215276	2.01188	10.6843	0.119708	0.800809	5.86506	50.5529	1.14774	0.827856	6.11589	53.2985	1.26569	0.198358	1.87522	9.77245	0.103192	0.739955	5.55313	40.2576	1.0629	0.695855	5.02291	44.0058	0.914735
0.5	Rendering 1	dataset09.01.2023	sieć mobilna A	MobileNet V3 Small	224	4		Flip, rotation	650	0	0	0	115	0	0	115	0	Nie	PiecewiseConstantDecay	RMSprop	0.001			0.689782	5.89135	35.193	0.975952	1.52187	10.0397	60.6646	4.0015	1.40995	8.64542	60.0486	3.53774	0.684251	5.87041	34.9485	0.943207	1.52799	10.022	62.0207	4.19232	1.38249	8.6176	59.3897	3.33667
0.5	Rendering 1	dataset09.01.2023	sieć mobilna A	MobileNet V3 Small	224	#NAME?	3	Poisson noise (strength 0.05)	650	0	5000	0	115	0	0	115	0	Tak	PiecewiseConstantDecay	Adam	1e-05	decay_steps=100000, decay_rate=0.96,	Nie	0.825542	6.94706	42.6699	1.28598	1.34321	9.35438	73.5883	2.81331	1.20701	8.57738	59.8889	2.72389	0.819612	6.88758	42.0524	1.27166	1.25952	9.15027	62.395	2.73313	1.27061	9.16749	62.8538	2.7511
0.5	Rendering 1	dataset09.01.2023	sieć mobilna A	MobileNet V3 Small	224	#NAME?	3	Poisson noise (strength 0.05)	650	0	2500	0	115	0	0	115	0	Tak	PiecewiseConstantDecay	Adam	1e-05	decay_steps=100000, decay_rate=0.96,	Nie	0.971839	7.69309	51.9629	1.77557	1.32255	9.2574	88.5888	2.92645	1.31398	9.14178	89.135	2.99067	0.967788	7.6605	52.4834	1.7105	1.35166	9.6604	76.0054	3.07031	1.33386	9.47475	71.596	3.13706
0.5	Rendering 1	dataset09.01.2023	sieć mobilna A	MobileNet V3 Small	224	#NAME?	3	Poisson noise (strength 0.05)	650	0	0	0	115	0	0	115	0	Tak	PiecewiseConstantDecay	Adam	1e-05	decay_steps=100000, decay_rate=0.96,	Nie	1.00187	5.98086	66.3049	1.63315	1.30907	8.90581	62.8486	2.7228	1.35621	8.94059	60.7949	3.02388	0.933069	5.4946	62.5553	1.46603	1.42912	9.66392	63.4277	3.28559	1.35367	9.25953	61.3667	2.98525
0.5	Rendering 1	dataset09.01.2023	sieć mobilna A	MobileNet V3 Small	224	#NAME?	3	Poisson noise (strength 0.05)	650	0	5000	0	115	0	0	115	0	Tak	PiecewiseConstantDecay	Adam	0.001	decay_steps=100000, decay_rate=0.96,	Nie	0.27471	2.56024	13.8246	0.157845	0.942635	7.04478	59.8694	1.56213	0.903893	6.86963	50.7017	1.57532	0.250465	2.33068	12.6954	0.132206	0.96359	7.37179	59.1546	1.60925	0.950205	7.24076	63.4409	1.60405
0.5	Rendering 1	dataset09.01.2023	sieć mobilna A	MobileNet V3 Small	224	#NAME?	3	Poisson noise (strength 0.05)	650	0	2500	0	115	0	0	115	0	Tak	PiecewiseConstantDecay	Adam	0.001	decay_steps=100000, decay_rate=0.96,	Nie	0.345412	3.09288	17.8228	0.242684	1.38468	9.64963	54.84	3.32995	1.3292	9.20033	53.7417	3.29083	0.357197	3.24246	18.0461	0.273134	1.377	9.80186	53.435	3.4096	1.37924	9.74066	52.861	3.36818
0.5	Rendering 1	dataset09.01.2023	sieć mobilna A	MobileNet V3 Small	224	#NAME?	3	Poisson noise (strength 0.05)	650	0	0	0	115	0	0	115	0	Tak	PiecewiseConstantDecay	Adam	0.001	decay_steps=100000, decay_rate=0.96,	Nie	0.390969	2.62205	25.2619	0.267737	1.08945	7.8533	87.7714	1.77337	1.05528	7.58613	84.773	1.80075	0.38768	2.53916	25.5191	0.26075	1.06313	8.0899	54.5851	2.21635	1.09083	8.18431	56.8372	2.28401
0.5	Rendering 1	dataset09.01.2023	sieć mobilna A	MobileNet V3 Small	224		3	Poisson noise (strength 0.05)	650	0	5000	0	115	0	0	115	0	Nie	PiecewiseConstantDecay	Adam		decay_steps=100000, decay_rate=0.96,	Tak	0.395799	3.64136	20.1393	0.33329	1.14517	7.37069	74.9967	2.19907	1.45931	10.2693	79.2035	3.28209	0.371128	3.40272	19.091	0.28747	1.26648	8.65724	72.0884	2.6614	1.28091	8.73072	81.617	2.79727
0.5	Rendering 1	dataset09.01.2023	sieć mobilna A	MobileNet V3 Small	224		3	Poisson noise (strength 0.05)	650	0	2500	0	115	0	0	115	0	Nie	PiecewiseConstantDecay	Adam		decay_steps=100000, decay_rate=0.96,	Tak	0.451665	3.9779	23.9363	0.424816	0.923106	6.17688	69.6559	1.58236	1.1551	8.63251	60.9333	2.38811	0.436777	3.83543	23.1761	0.39022	1.09776	7.56697	67.119	2.00453	1.08307	7.6428	70.7615	2.16034
0.5	Rendering 1	dataset09.01.2023	sieć mobilna A	MobileNet V3 Small	224		3	Poisson noise (strength 0.05)	650	0	0	0	115	0	0	115	0	Nie	PiecewiseConstantDecay	Adam		decay_steps=100000, decay_rate=0.96,	Tak	0.514092	3.17629	35.8044	0.462863	0.994896	6.46023	56.4787	1.93783	1.29962	9.29658	62.9749	2.83945	0.445974	2.82261	29.8037	0.372655	1.13743	7.68316	59.9604	2.24967	1.15782	7.97938	62.4391	2.58742
0.5	Rendering 1	dataset09.01.2023	sieć mobilna A	MobileNet V3 Small	224		3	Poisson noise (strength 0.05)	650	0	5000	0	115	0	0	115	0	Nie	PiecewiseConstantDecay	Adam		decay_steps=100000, decay_rate=0.96,	Tak	0.163255	1.52694	8.3182	0.0588856	1.23405	7.69007	55.7573	2.87312	1.64706	11.11	62.6164	4.55043	0.140993	1.32794	7.06839	0.0473997	1.41571	9.1896	56.4982	3.51642	1.37405	9.12677	57.4479	3.58677
0.5	Rendering 1	dataset09.01.2023	sieć mobilna A	MobileNet V3 Small	224		3	Poisson noise (strength 0.05)	650	0	2500	0	115	0	0	115	0	Nie	PiecewiseConstantDecay	Adam		decay_steps=100000, decay_rate=0.96,	Tak	0.155934	1.44134	8.02939	0.0530421	1.03594	6.79186	57.3806	2.1967	1.33463	9.69234	55.9409	3.34618	0.13884	1.29992	7.03436	0.0437426	1.10074	7.76415	50.0968	2.43223	1.10671	7.84814	57.5311	2.48335
0.5	Rendering 1	dataset09.01.2023	sieć mobilna A	MobileNet V3 Small	224		3	Poisson noise (strength 0.05)	650	0	0	0	115	0	0	115	0	Nie	PiecewiseConstantDecay	Adam		decay_steps=100000, decay_rate=0.96,	Tak	0.158632	1.02843	11.1881	0.0480816	1.15129	7.36107	51.0946	2.57022	1.52302	10.6153	55.5246	4.00834	0.167698	1.10149	11.3645	0.0515131	1.09876	7.77573	51.4939	2.23376	1.17979	8.26212	57.5303	2.74473
0.5	Rendering 1	dataset09.01.2023	sieć mobilna A	MobileNet V3 Small	224		3	Poisson noise (strength 0.05)	650	0	5000	0	115	0	0	115	0	Tak	CosineDecay	Adam	1		Tak	1.067	8.794	47.319	2.23	1.501	10.151	60.792	3.862	1.517	10.12	64.82	3.997	1.073	8.881	47.908	2.248	1.46	9.42	62.721	3.682	1.409	9.407	64.806	3.705
0.5	Rendering 1	dataset09.01.2023	sieć mobilna A	MobileNet V3 Small	224		3	Poisson noise (strength 0.05)	650	0	2500	0	115	0	0	115	0	Tak	CosineDecay	Adam	1		Tak	0.799	6.721	40.326	1.261	1.353	9.117	62.302	3.146	1.397	9.317	66.835	3.271	0.812	6.806	41.25	1.323	1.518	9.8	65.542	3.909	1.485	9.595	62.467	4.005
0.5	Rendering 1	dataset09.01.2023	sieć mobilna A	MobileNet V3 Small	224		3	Poisson noise (strength 0.05)	650	0	0	0	115	0	0	115	0	Tak	CosineDecay	Adam	1		Tak	0.639	4.11	40.012	0.747	1.188	8.342	62.669	2.564	1.144	8.153	61.907	2.407	0.644	4.146	39.087	0.78	1.253	8.653	58.081	2.871	1.213	8.401	60.911	2.682
0.5	Rendering 1	dataset09.01.2023	sieć mobilna A	MobileNet V3 Small	224		3	Poisson noise (strength 0.05)	650	0	5000	0	115	0	0	115	0	Tak	CosineDecay	Adam	1		Nie	0.3	2.801	15.035	0.194	1.054	7.627	62.729	2.054	1.118	8.03	62.027	2.352	0.284	2.614	14.534	0.169	1.034	7.192	49.683	2.156	1.043	7.435	53.277	2.263
0.5	Rendering 1	dataset09.01.2023	sieć mobilna A	MobileNet V3 Small	224		3	Poisson noise (strength 0.05)	650	0	2500	0	115	0	0	115	0	Tak	CosineDecay	Adam	1		Nie	0.271	2.478	14.144	0.159	0.854	6.369	57.868	1.315	0.857	6.339	59.856	1.302	0.251	2.285	13.028	0.136	0.935	6.964	46.608	1.604	0.93	6.912	44.587	1.666
0.5	Rendering 1	dataset09.01.2023	sieć mobilna A	MobileNet V3 Small	224		3	Poisson noise (strength 0.05)	650	0	0	0	115	0	0	115	0	Tak	CosineDecay	Adam	1		Nie	0.237	1.596	15.761	0.098	1.067	7.783	53.243	2.181	1.066	7.791	54.136	2.203	0.226	1.545	14.822	0.093	1.109	8.007	48.07	2.403	1.081	7.813	48.72	2.297
0.5	Rendering 1	dataset09.01.2023	sieć mobilna A	MobileNet V3 Small	224	2	3	Poisson noise (strength 0.05)	650	0	5000	0	115	0	0	115	0	Tak	ExponentialDecay	Adam				0.514925	4.60406	25.6344	0.523566	0.89377	6.66197	51.0302	1.44385	0.904189	6.64707	55.3818	1.44367	0.388929	3.56805	19.8377	0.308793	1.06679	7.84948	46.7489	2.09597	1.03933	7.6652	45.9873	2.14923
0.5	Rendering 1	dataset09.01.2023	sieć mobilna A	MobileNet V3 Small	224	2	3	Poisson noise (strength 0.05)	650	0	2500	0	115	0	0	115	0	Tak	ExponentialDecay	Adam				0.550691	4.72329	28.6168	0.608649	0.930237	6.87896	53.1019	1.53753	0.930845	6.82487	57.9012	1.5128	0.437324	3.85633	23.3943	0.381295	1.03048	7.58276	51.0357	1.90519	1.01247	7.45982	49.3714	2.01562
0.5	Rendering 1	dataset09.01.2023	sieć mobilna A	MobileNet V3 Small	224	2	3	Poisson noise (strength 0.05)	650	0	0	0	115	0	0	115	0	Tak	ExponentialDecay	Adam				0.732448	4.61277	46.8174	0.922599	1.03438	7.55632	45.8699	2.02569	1.00731	7.34471	46.0375	1.96819	0.589028	3.72385	39.089	0.641698	1.06461	7.83143	47.2474	2.06367	1.03782	7.63962	46.7968	2.12354
0.5	Rendering 1	dataset09.01.2023	sieć mobilna A	MobileNet V3 Small	224	2	3	Poisson noise (strength 0.05)	650	0	5000	0	115	0	0	115	0	Tak	ExponentialDecay	Adam				0.444305	4.05351	21.6691	0.423988	19.6473	580.009	8456.44	446.853	19.4471	560.154	9442.29	432.633	0.387187	3.53147	19.3182	0.315156	1.25096	8.95239	87.2819	2.83666	1.14072	8.05138	85.0621	2.40868
0.5	Rendering 1	dataset09.01.2023	sieć mobilna A	MobileNet V3 Small	224	2	3	Poisson noise (strength 0.05)	650	0	2500	0	115	0	0	115	0	Tak	ExponentialDecay	Adam				0.759302	6.3778	37.3412	1.17849	15.1643	381.528	7279.8	283.583	15.3289	404.269	9068.69	306.915	0.629476	5.47041	31.1902	0.814666	7.37711	138.232	2506.2	93.2215	7.56872	144.085	2990.82	98.3849
0.5	Rendering 1	dataset09.01.2023	sieć mobilna A	MobileNet V3 Small	224	2	3	Poisson noise (strength 0.05)	650	0	0	0	115	0	0	115	0	Tak	ExponentialDecay	Adam				0.823362	5.07229	51.486	1.22019	756.915	646789	11233476	641801	758.535	653752	10430722	648620	0.696104	4.49105	46.2273	0.902815	25.7705	978.975	17765	808.586	26.5014	1059.65	21320.4	887.924
0.5	Rendering 1	dataset09.01.2023	sieć mobilna A	MobileNet V3 Small	224	#NAME?	3	Poisson noise (strength 0.05)	650	0	5000	0	115	0	0	115	0	Tak	PiecewiseConstantDecay	RMSprop	1e-05	decay_steps=100000, decay_rate=0.96,	Nie	0.639853	5.58722	33.5005	0.800884	1.32434	9.24828	79.8291	2.77497	1.17949	8.39361	65.4775	2.50088	0.633105	5.50147	33.0815	0.778144	1.30314	9.37389	73.059	2.79082	1.25045	9.06457	64.3337	2.72958
0.5	Rendering 1	dataset09.01.2023	sieć mobilna A	MobileNet V3 Small	224	#NAME?	3	Poisson noise (strength 0.05)	650	0	2500	0	115	0	0	115	0	Tak	PiecewiseConstantDecay	RMSprop	1e-05	decay_steps=100000, decay_rate=0.96,	Nie	0.765785	6.3637	40.837	1.11051	1.28276	9.02965	77.8745	2.71955	1.11036	7.98239	68.1851	2.25998	0.740119	6.1359	40.6883	1.03283	1.28318	9.26525	71.9375	2.82772	1.24071	8.98827	66.6414	2.73938
0.5	Rendering 1	dataset09.01.2023	sieć mobilna A	MobileNet V3 Small	224	#NAME?	3	Poisson noise (strength 0.05)	650	0	0	0	115	0	0	115	0	Tak	PiecewiseConstantDecay	RMSprop	1e-05	decay_steps=100000, decay_rate=0.96,	Nie	0.939317	5.65705	65.6802	1.4392	1.58723	10.1955	67.2347	3.94632	1.45294	9.42084	64.4255	3.41415	0.973505	5.86797	65.9407	1.51175	1.53006	10.2035	62.427	3.76053	1.43086	9.67079	59.81	3.38967
0.5	Rendering 1	dataset09.01.2023	sieć mobilna A	MobileNet V3 Small	224	#NAME?	3	Poisson noise (strength 0.05)	650	0	5000	0	115	0	0	115	0	Tak	PiecewiseConstantDecay	RMSprop	0.001	decay_steps=100000, decay_rate=0.96,	Nie	0.204807	1.93445	10.1705	0.0902124	1.02815	7.50892	54.7789	1.7018	0.959592	7.04377	49.7011	1.64776	0.188185	1.78268	9.31518	0.0766798	1.06155	7.92616	48.6515	1.92843	1.09192	7.98339	55.5116	1.95429
0.5	Rendering 1	dataset09.01.2023	sieć mobilna A	MobileNet V3 Small	224	#NAME?	3	Poisson noise (strength 0.05)	650	0	2500	0	115	0	0	115	0	Tak	PiecewiseConstantDecay	RMSprop	0.001	decay_steps=100000, decay_rate=0.96,	Nie	0.213568	1.99184	10.7727	0.0970989	0.784294	5.948	48.222	1.12224	0.843129	6.57407	47.0732	1.29005	0.205001	1.90556	10.3202	0.0924986	0.769938	5.73008	48.1924	1.11646	0.826997	6.27388	48.2759	1.24708
0.5	Rendering 1	dataset09.01.2023	sieć mobilna A	MobileNet V3 Small	224	#NAME?	3	Poisson noise (strength 0.05)	650	0	0	0	115	0	0	115	0	Tak	PiecewiseConstantDecay	RMSprop	0.001	decay_steps=100000, decay_rate=0.96,	Nie	0.358634	2.43513	23.9427	0.236894	1.208	8.69565	62.4719	2.48817	1.16168	8.31451	64.0451	2.38325	0.307856	2.0333	20.3841	0.169772	1.39993	9.88938	55.3398	3.47495	1.40613	9.84175	56.6916	3.42858
0.5	Rendering 1	dataset09.01.2023	sieć mobilna A	MobileNet V3 Small	224		3	Poisson noise (strength 0.05)	650	0	5000	0	115	0	0	115	0	Nie	PiecewiseConstantDecay	RMSprop		decay_steps=100000, decay_rate=0.96,	Tak	0.319318	2.91444	16.7427	0.21706	0.950114	6.27151	77.3487	1.48203	1.17015	8.62995	68.7653	2.29706	0.311768	2.82989	16.3764	0.204647	1.11091	7.70234	69.6102	2.11668	1.16549	8.08945	85.0586	2.2081
0.5	Rendering 1	dataset09.01.2023	sieć mobilna A	MobileNet V3 Small	224		3	Poisson noise (strength 0.05)	650	0	2500	0	115	0	0	115	0	Nie	PiecewiseConstantDecay	RMSprop		decay_steps=100000, decay_rate=0.96,	Tak	0.369043	3.31663	19.0953	0.285415	0.861075	5.80582	70.0304	1.37114	1.17312	8.81802	64.4318	2.38054	0.368434	3.2774	19.7451	0.282662	1.05462	7.46674	67.2281	1.96108	1.04868	7.40487	76.9771	2.06785
0.5	Rendering 1	dataset09.01.2023	sieć mobilna A	MobileNet V3 Small	224		3	Poisson noise (strength 0.05)	650	0	0	0	115	0	0	115	0	Nie	PiecewiseConstantDecay	RMSprop		decay_steps=100000, decay_rate=0.96,	Tak	0.437046	2.79832	31.2416	0.336563	1.0503	6.61399	67.4029	1.88639	1.26326	8.94572	60.2512	2.54656	0.449987	2.84747	30.7472	0.340563	1.14529	7.51287	63.9352	2.09952	1.11799	7.36218	74.9669	2.07883
0.5	Rendering 1	dataset09.01.2023	sieć mobilna A	MobileNet V3 Small	224		3	Poisson noise (strength 0.05)	650	0	5000	0	115	0	0	115	0	Nie	PiecewiseConstantDecay	RMSprop		decay_steps=100000, decay_rate=0.96,	Tak	0.0616839	0.59147	3.07702	0.00887669	0.952987	6.86605	137.931	1.89977	0.870953	6.79314	95.7528	1.48723	0.0503231	0.482331	2.49342	0.00607765	0.79394	5.97996	80.8225	1.25992	0.742185	5.65838	73.7934	1.16571
0.5	Rendering 1	dataset09.01.2023	sieć mobilna A	MobileNet V3 Small	224		3	Poisson noise (strength 0.05)	650	0	2500	0	115	0	0	115	0	Nie	PiecewiseConstantDecay	RMSprop		decay_steps=100000, decay_rate=0.96,	Tak	0.0753752	0.699607	3.86316	0.0128481	0.557958	3.96246	42.6225	0.650573	0.696873	5.72683	36.1733	0.996123	0.061231	0.577537	3.0951	0.00942404	0.555988	4.30596	34.4649	0.662377	0.61426	4.73488	41.6122	0.786993
0.5	Rendering 1	dataset09.01.2023	sieć mobilna A	MobileNet V3 Small	224		3	Poisson noise (strength 0.05)	650	0	0	0	115	0	0	115	0	Nie	PiecewiseConstantDecay	RMSprop		decay_steps=100000, decay_rate=0.96,	Tak	0.113211	0.747727	7.84903	0.0225266	1.03301	6.90365	43.5431	2.17235	1.41727	10.1806	52.4525	3.40019	0.0983321	0.67207	6.64076	0.0165904	1.25169	8.53523	51.2579	2.71083	1.20627	8.4378	49.3547	2.77195
0.5	Rendering 1	dataset09.01.2023	sieć mobilna A	MobileNet V3 Small	224		3	Poisson noise (strength 0.05)	650	0	5000	0	115	0	0	115	0	Tak	CosineDecay	RMSprop	1		Tak	0.774	6.706	38.781	1.201	1.33	9.316	65.705	3.002	1.342	9.324	64.91	3.147	0.772	6.673	38.551	1.184	1.349	8.976	57.61	3.285	1.339	9.091	64.449	3.43
0.5	Rendering 1	dataset09.01.2023	sieć mobilna A	MobileNet V3 Small	224		3	Poisson noise (strength 0.05)	650	0	2500	0	115	0	0	115	0	Tak	CosineDecay	RMSprop	1		Tak	0.749	6.248	37.921	1.157	1.233	8.598	54.75	2.68	1.211	8.511	53.53	2.648	0.765	6.397	39.059	1.177	1.505	9.707	60.452	3.832	1.433	9.379	56.686	3.701
0.5	Rendering 1	dataset09.01.2023	sieć mobilna A	MobileNet V3 Small	224		3	Poisson noise (strength 0.05)	650	0	0	0	115	0	0	115	0	Tak	CosineDecay	RMSprop	1		Tak	0.605	3.823	38.652	0.669	1.102	7.91	62.265	2.26	1.013	7.439	53.817	2.023	0.595	3.845	37.597	0.671	1.175	8.266	57.209	2.521	1.133	8.024	56.19	2.403
0.5	Rendering 1	dataset09.01.2023	sieć mobilna A	MobileNet V3 Small	224		3	Poisson noise (strength 0.05)	650	0	5000	0	115	0	0	115	0	Tak	CosineDecay	RMSprop	1		Nie	0.271	2.54	13.591	0.153	0.999	7.49	42.927	1.828	0.975	7.385	40.489	1.863	0.267	2.506	13.315	0.147	0.915	6.604	40.271	1.523	0.888	6.595	40.138	1.526
0.5	Rendering 1	dataset09.01.2023	sieć mobilna A	MobileNet V3 Small	224		3	Poisson noise (strength 0.05)	650	0	2500	0	115	0	0	115	0	Tak	CosineDecay	RMSprop	1		Nie	0.25	2.291	12.928	0.13	1.035	7.302	120.716	1.478	1.021	7.234	119.936	1.439	0.264	2.424	13.577	0.144	0.631	4.672	52.039	0.656	0.588	4.363	47.046	0.647
0.5	Rendering 1	dataset09.01.2023	sieć mobilna A	MobileNet V3 Small	224		3	Poisson noise (strength 0.05)	650	0	0	0	115	0	0	115	0	Tak	CosineDecay	RMSprop	1		Nie	0.265	1.836	17.278	0.131	0.695	5.305	40.393	1.007	0.703	5.279	44.279	0.97	0.224	1.515	14.782	0.089	0.837	6.123	44.775	1.282	0.787	5.707	43.431	1.107
0.5	Rendering 1	dataset09.01.2023	sieć mobilna A	MobileNet V3 Small	224	2	3	Poisson noise (strength 0.05)	650	0	5000	0	115	0	0	115	0	Tak	ExponentialDecay	RMSprop				0.392447	3.62152	20.0084	0.314824	0.819867	6.09534	54.4399	1.15862	0.843237	6.15366	61.5345	1.13954	0.339403	3.11401	17.345	0.234859	0.972649	7.25328	46.0751	1.77168	0.983913	7.26525	48.1011	1.79972
0.5	Rendering 1	dataset09.01.2023	sieć mobilna A	MobileNet V3 Small	224	2	3	Poisson noise (strength 0.05)	650	0	2500	0	115	0	0	115	0	Tak	ExponentialDecay	RMSprop				0.452687	4.05458	23.3792	0.422385	0.760128	5.61011	53.872	0.972705	0.766283	5.57661	58.0471	0.936944	0.420289	3.8235	21.5948	0.353967	0.844637	6.39625	47.0664	1.25925	0.839714	6.3416	48.25	1.34069
0.5	Rendering 1	dataset09.01.2023	sieć mobilna A	MobileNet V3 Small	224	2	3	Poisson noise (strength 0.05)	650	0	0	0	115	0	0	115	0	Tak	ExponentialDecay	RMSprop				0.589035	3.90821	39.6742	0.60539	1.22437	8.56621	54.0644	2.74315	1.18997	8.29271	54.7606	2.58442	0.517254	3.36982	32.9188	0.452315	1.49366	9.8812	58.6086	3.65726	1.44321	9.61963	56.9162	3.60381
0.5	Rendering 1	dataset09.01.2023	sieć mobilna A	MobileNet V3 Small	224	2	3	Poisson noise (strength 0.05)	650	0	5000	0	115	0	0	115	0	Tak	ExponentialDecay	RMSprop				2.41471	15.3661	91.3987	8.6418	1.97175	11.5365	71.3715	6.00176	1.92286	11.1988	70.8057	5.79612	2.41557	15.3685	91.3691	8.64754	1.94893	11.5627	71.1238	5.98077	1.89182	11.2534	70.2388	5.84598
0.5	Rendering 1	dataset09.01.2023	sieć mobilna A	MobileNet V3 Small	224	2	3	Poisson noise (strength 0.05)	650	0	2500	0	115	0	0	115	0	Tak	ExponentialDecay	RMSprop				2.26182	14.3417	89.7002	7.74523	1.8944	11.3118	69.4568	5.65723	1.84702	10.9784	69.1152	5.46055	2.25688	14.3247	89.8922	7.71497	1.8993	11.4173	69.8659	5.76346	1.84821	11.1257	69.7429	5.63812
0.5	Rendering 1	dataset09.01.2023	sieć mobilna A	MobileNet V3 Small	224	2	3	Poisson noise (strength 0.05)	650	0	0	0	115	0	0	115	0	Tak	ExponentialDecay	RMSprop				1.27808	7.13242	67.9257	2.54692	3.04156	30.1467	533.238	17.4848	3.30829	38.0057	523.774	22.7124	1.12121	6.24265	71.0893	2.0885	3.93454	12.5609	90.9044	19.0233	3.91907	11.9644	89.6953	19.5266
0.5	Rendering 1	dataset09.01.2023	sieć mobilna A	MobileNet V3 Small	224	#NAME?	4	Poisson noise (strength 0.1)	650	0	5000	0	115	0	0	115	0	Tak	PiecewiseConstantDecay	Adam	1e-05	decay_steps=100000, decay_rate=0.96,	Nie	0.836254	7.09322	43.3082	1.34847	1.50334	9.76343	61.6543	4.03023	1.55826	10.3469	62.0798	4.39038	0.836154	7.09314	43.1754	1.33277	1.54869	10.1745	62.1056	4.23358	1.47486	9.06637	61.6505	3.76552
0.5	Rendering 1	dataset09.01.2023	sieć mobilna A	MobileNet V3 Small	224	#NAME?	4	Poisson noise (strength 0.1)	650	0	2500	0	115	0	0	115	0	Tak	PiecewiseConstantDecay	Adam	1e-05	decay_steps=100000, decay_rate=0.96,	Nie	0.990228	7.95939	50.8298	1.83085	1.44878	9.52421	57.381	3.81899	1.49926	10.1327	58.8364	4.15595	1.00581	8.16829	52.1254	1.87831	1.59543	10.3477	61.3736	4.47206	1.43263	8.8707	59.4831	3.59574
0.5	Rendering 1	dataset09.01.2023	sieć mobilna A	MobileNet V3 Small	224	#NAME?	4	Poisson noise (strength 0.1)	650	0	0	0	115	0	0	115	0	Tak	PiecewiseConstantDecay	Adam	1e-05	decay_steps=100000, decay_rate=0.96,	Nie	1.12492	6.36667	71.376	2.03474	1.28275	8.68125	67.0663	2.84718	1.31398	9.10729	79.9525	3.05825	1.06609	5.99754	72.4689	1.85004	1.34003	8.97864	73.2487	3.13342	1.26193	7.97975	76.0558	2.38128
0.5	Rendering 1	dataset09.01.2023	sieć mobilna A	MobileNet V3 Small	224	#NAME?	4	Poisson noise (strength 0.1)	650	0	5000	0	115	0	0	115	0	Tak	PiecewiseConstantDecay	Adam	0.001	decay_steps=100000, decay_rate=0.96,	Nie	0.291653	2.738	14.7057	0.188145	1.45733	10.119	59.3965	3.59796	1.36146	9.59586	55.0988	3.39244	0.257461	2.41019	12.8363	0.145515	1.40835	9.90038	55.8155	3.49743	1.36825	9.39942	56.0109	3.36124
0.5	Rendering 1	dataset09.01.2023	sieć mobilna A	MobileNet V3 Small	224	#NAME?	4	Poisson noise (strength 0.1)	650	0	2500	0	115	0	0	115	0	Tak	PiecewiseConstantDecay	Adam	0.001	decay_steps=100000, decay_rate=0.96,	Nie	0.382784	3.52673	19.6348	0.318653	1.06932	7.77838	53.0841	2.31927	1.14364	8.47757	56.7604	2.6005	0.365235	3.35833	18.6794	0.283302	1.18368	8.53785	57.0512	2.68417	1.01249	6.99517	50.7772	1.92128
0.5	Rendering 1	dataset09.01.2023	sieć mobilna A	MobileNet V3 Small	224	#NAME?	4	Poisson noise (strength 0.1)	650	0	0	0	115	0	0	115	0	Tak	PiecewiseConstantDecay	Adam	0.001	decay_steps=100000, decay_rate=0.96,	Nie	0.402146	2.728	26.1431	0.30984	1.01893	7.36042	66.6968	1.7465	1.08475	7.98406	74.6785	1.96623	0.370113	2.44147	24.3462	0.245872	1.09863	8.1001	53.7521	2.26568	0.938528	6.62086	48.1472	1.57944
0.5	Rendering 1	dataset09.01.2023	sieć mobilna A	MobileNet V3 Small	224		4	Poisson noise (strength 0.1)	650	0	5000	0	115	0	0	115	0	Tak	CosineDecay	Adam	1		Tak	0.868	7.413	41.526	1.501	1.955	11.783	72.695	6.084	1.912	11.514	68.735	6.052	0.864	7.369	42.3	1.459	1.822	10.655	68.81	5.356	1.804	10.797	69.497	5.577
0.5	Rendering 1	dataset09.01.2023	sieć mobilna A	MobileNet V3 Small	224		4	Poisson noise (strength 0.1)	650	0	2500	0	115	0	0	115	0	Tak	CosineDecay	Adam	1		Tak	0.848	7.005	41.589	1.432	1.37	9.213	68.791	3.279	1.43	9.518	76.694	3.373	0.84	7	41.455	1.43	1.57	10.016	70.527	4.215	1.553	9.864	74.034	4.235
0.5	Rendering 1	dataset09.01.2023	sieć mobilna A	MobileNet V3 Small	224		4	Poisson noise (strength 0.1)	650	0	0	0	115	0	0	115	0	Tak	CosineDecay	Adam	1		Tak	0.674	4.237	43.224	0.798	1.315	8.982	56.967	3.239	1.329	9.103	58.99	3.293	0.641	4.132	39.884	0.738	1.382	9.22	60.337	3.427	1.297	8.846	54.246	3.279
0.5	Rendering 1	dataset09.01.2023	sieć mobilna A	MobileNet V3 Small	224		4	Poisson noise (strength 0.1)	650	0	5000	0	115	0	0	115	0	Tak	CosineDecay	Adam	1		Nie	0.312	2.92	15.73	0.21	1.003	7.467	61.944	1.817	1.038	7.638	62.84	1.953	0.309	2.884	15.578	0.204	1.042	7.405	50.47	1.992	1.078	7.762	54.498	2.18
0.5	Rendering 1	dataset09.01.2023	sieć mobilna A	MobileNet V3 Small	224		4	Poisson noise (strength 0.1)	650	0	2500	0	115	0	0	115	0	Tak	CosineDecay	Adam	1		Nie	0.269	2.481	13.675	0.153	0.804	6.034	58.771	1.203	0.811	6.095	59.59	1.223	0.261	2.389	13.362	0.146	0.836	6.391	44.302	1.394	0.813	6.24	42.75	1.387
0.5	Rendering 1	dataset09.01.2023	sieć mobilna A	MobileNet V3 Small	224		4	Poisson noise (strength 0.1)	650	0	0	0	115	0	0	115	0	Tak	CosineDecay	Adam	1		Nie	0.249	1.715	16.097	0.11	0.926	6.918	44.802	1.727	0.965	7.152	47.663	1.811	0.235	1.601	15.401	0.102	1.014	7.419	44.868	2.093	0.95	7.009	43.336	1.815
0.5	Rendering 1	dataset09.01.2023	sieć mobilna A	MobileNet V3 Small	224	2	4	Poisson noise (strength 0.1)	650	0	5000	0	115	0	0	115	0	Tak	ExponentialDecay	Adam				0.500419	4.53475	25.4993	0.523103	0.940166	6.90951	52.3656	1.53108	0.924664	6.7759	53.8048	1.46284	0.407935	3.74491	20.9356	0.349743	1.051	7.7326	51.4899	2.03435	1.03	7.62245	50.2271	2.0716
0.5	Rendering 1	dataset09.01.2023	sieć mobilna A	MobileNet V3 Small	224	2	4	Poisson noise (strength 0.1)	650	0	2500	0	115	0	0	115	0	Tak	ExponentialDecay	Adam				0.550639	4.79206	28.5202	0.618383	0.885774	6.50861	61.6741	1.38626	0.910901	6.6	68.5035	1.42422	0.461987	4.15674	24.5574	0.437407	0.995053	7.41353	48.5755	1.83141	0.991838	7.33885	49.5231	1.95221
0.5	Rendering 1	dataset09.01.2023	sieć mobilna A	MobileNet V3 Small	224	2	4	Poisson noise (strength 0.1)	650	0	0	0	115	0	0	115	0	Tak	ExponentialDecay	Adam				0.641518	4.02739	40.0221	0.718322	1.29976	8.92861	54.2884	2.94038	1.26412	8.65108	55.0297	2.80471	0.514817	3.31144	31.7273	0.488801	1.24374	8.75349	53.5243	2.7319	1.22075	8.57114	54.7068	2.76053
0.5	Rendering 1	dataset09.01.2023	sieć mobilna A	MobileNet V3 Small	224	2	4	Poisson noise (strength 0.1)	650	0	5000	0	115	0	0	115	0	Tak	ExponentialDecay	Adam				0.761715	6.50639	36.9536	1.20602	88.3983	11738.6	259066	11201.8	91.2812	12467.6	285186	11933.5	0.656858	5.75455	32.9082	0.900964	2.91818	76.9602	419.915	56.1094	3.05063	80.7605	502.422	60.8788
0.5	Rendering 1	dataset09.01.2023	sieć mobilna A	MobileNet V3 Small	224	2	4	Poisson noise (strength 0.1)	650	0	2500	0	115	0	0	115	0	Tak	ExponentialDecay	Adam				0.800819	6.60047	40.1198	1.2918	14.8354	362.354	6487.57	266.45	15.0515	368.876	7762	274.271	0.795237	6.63937	39.626	1.3149	1.39311	9.76422	140.492	2.92727	1.49048	10.1694	199.033	3.24262
0.5	Rendering 1	dataset09.01.2023	sieć mobilna A	MobileNet V3 Small	224	2	4	Poisson noise (strength 0.1)	650	0	0	0	115	0	0	115	0	Tak	ExponentialDecay	Adam				1.25013	6.91785	65.0854	2.50434	5206.68	29123080	434442144	29087256	5280.15	30029700	436028608	29993330	0.893411	5.46961	53.5757	1.45336	530.357	294348	4481414	290672	545.666	315133	5.27205e+06	311440
0.5	Rendering 1	dataset09.01.2023	sieć mobilna A	MobileNet V3 Small	224	#NAME?	4	Poisson noise (strength 0.1)	650	0	5000	0	115	0	0	115	0	Tak	PiecewiseConstantDecay	RMSprop	1e-05	decay_steps=100000, decay_rate=0.96,	Nie	0.70172	6.03715	37.5449	0.953227	1.59099	10.4893	69.4873	4.11205	1.43131	9.52705	59.6345	3.66311	0.700485	6.05686	37.3936	0.952087	1.53654	10.4454	63.1932	4.07151	1.55966	10.4752	63.9097	4.15975
0.5	Rendering 1	dataset09.01.2023	sieć mobilna A	MobileNet V3 Small	224	#NAME?	4	Poisson noise (strength 0.1)	650	0	2500	0	115	0	0	115	0	Tak	PiecewiseConstantDecay	RMSprop	1e-05	decay_steps=100000, decay_rate=0.96,	Nie	0.842221	6.88253	44.1449	1.36155	1.6208	10.6337	67.8426	4.29429	1.46732	9.75758	59.9913	3.9332	0.819589	6.77533	43.6161	1.28448	1.62854	10.8439	62.288	4.53248	1.56281	10.5033	60.9724	4.36536
0.5	Rendering 1	dataset09.01.2023	sieć mobilna A	MobileNet V3 Small	224	#NAME?	4	Poisson noise (strength 0.1)	650	0	0	0	115	0	0	115	0	Tak	PiecewiseConstantDecay	RMSprop	1e-05	decay_steps=100000, decay_rate=0.96,	Nie	1.08173	6.30149	69.9351	1.87755	1.59691	10.2057	67.1899	4.10962	1.52141	9.70783	65.5993	3.82684	1.04484	5.79907	68.6155	1.84415	1.64819	10.6396	71.2813	4.31225	1.60428	10.4418	65.5404	4.29844
0.5	Rendering 1	dataset09.01.2023	sieć mobilna A	MobileNet V3 Small	224	#NAME?	4	Poisson noise (strength 0.1)	650	0	5000	0	115	0	0	115	0	Tak	PiecewiseConstantDecay	RMSprop	0.001	decay_steps=100000, decay_rate=0.96,	Nie	0.201651	1.91244	9.97194	0.0954254	1.25056	8.57093	54.3985	2.70594	1.35735	9.43104	56.3079	3.21051	0.184361	1.74022	9.12615	0.0787707	1.33333	9.18447	55.4867	2.99694	1.21351	7.82884	55.8924	2.2697
0.5	Rendering 1	dataset09.01.2023	sieć mobilna A	MobileNet V3 Small	224	#NAME?	4	Poisson noise (strength 0.1)	650	0	2500	0	115	0	0	115	0	Tak	PiecewiseConstantDecay	RMSprop	0.001	decay_steps=100000, decay_rate=0.96,	Nie	0.267004	2.45769	13.6595	0.151561	0.978824	7.39146	54.6842	1.6599	0.884097	6.73694	48.8949	1.52848	0.249897	2.32976	12.6041	0.142744	0.998523	7.71458	50.9004	1.82035	0.972932	7.48161	52.8647	1.7299
0.5	Rendering 1	dataset09.01.2023	sieć mobilna A	MobileNet V3 Small	224	#NAME?	4	Poisson noise (strength 0.1)	650	0	0	0	115	0	0	115	0	Tak	PiecewiseConstantDecay	RMSprop	0.001	decay_steps=100000, decay_rate=0.96,	Nie	0.328066	2.22349	21.9247	0.190786	1.09197	7.84319	52.5661	2.20382	1.11979	8.34608	50.9297	2.42808	0.313575	2.10731	20.6895	0.176254	1.13289	8.31256	48.932	2.43674	1.05458	7.23937	48.2623	1.96731
0.5	Rendering 1	dataset09.01.2023	sieć mobilna A	MobileNet V3 Small	224		4	Poisson noise (strength 0.1)	650	0	5000	0	115	0	0	115	0	Nie	PiecewiseConstantDecay	RMSprop		decay_steps=100000, decay_rate=0.96,	Tak	0.404079	3.73637	20.6924	0.349464	0.944014	6.36038	69.3626	1.72982	1.22679	9.04691	60.4658	2.88269	0.39621	3.62732	20.1966	0.340179	1.07948	7.62874	58.2045	2.28006	1.11419	7.85922	69.7752	2.49829
0.5	Rendering 1	dataset09.01.2023	sieć mobilna A	MobileNet V3 Small	224		4	Poisson noise (strength 0.1)	650	0	2500	0	115	0	0	115	0	Nie	PiecewiseConstantDecay	RMSprop		decay_steps=100000, decay_rate=0.96,	Tak	0.44767	3.96095	23.1206	0.433319	0.951021	6.38511	67.5903	1.77293	1.32778	9.6824	69.058	2.99252	0.4378	3.91155	22.7723	0.410992	1.1568	8.03345	61.5203	2.42228	1.19131	8.30524	76.8504	2.80408
0.5	Rendering 1	dataset09.01.2023	sieć mobilna A	MobileNet V3 Small	224		4	Poisson noise (strength 0.1)	650	0	0	0	115	0	0	115	0	Nie	PiecewiseConstantDecay	RMSprop		decay_steps=100000, decay_rate=0.96,	Tak	0.503324	3.19744	34.7745	0.424434	1.02038	6.52106	75.4057	1.78283	1.13324	8.13266	62.8907	2.21509	0.518363	3.24973	35.9585	0.445787	1.04664	7.2134	62.048	1.83919	1.01614	7.14614	68.0417	1.92094
0.5	Rendering 1	dataset09.01.2023	sieć mobilna A	MobileNet V3 Small	224		4	Poisson noise (strength 0.1)	650	0	5000	0	115	0	0	115	0	Nie	PiecewiseConstantDecay	RMSprop		decay_steps=100000, decay_rate=0.96,	Tak	0.0787087	0.748925	3.93932	0.0149312	0.635482	4.43858	62.4011	0.834771	0.699464	5.64885	44.4538	0.970379	0.065738	0.630264	3.26396	0.0108509	0.665946	5.00064	53.3091	0.897151	0.702709	5.36083	53.9959	1.01606
0.5	Rendering 1	dataset09.01.2023	sieć mobilna A	MobileNet V3 Small	224		4	Poisson noise (strength 0.1)	650	0	2500	0	115	0	0	115	0	Nie	PiecewiseConstantDecay	RMSprop		decay_steps=100000, decay_rate=0.96,	Tak	0.0981438	0.927233	4.95709	0.0234857	1.02525	6.81648	154.535	1.86866	1.0502	7.8972	110.36	1.8668	0.0786475	0.74832	3.9056	0.0170878	0.907261	6.48522	104.491	1.45201	0.992219	6.93181	127.097	1.57384
0.5	Rendering 1	dataset09.01.2023	sieć mobilna A	MobileNet V3 Small	224		4	Poisson noise (strength 0.1)	650	0	0	0	115	0	0	115	0	Nie	PiecewiseConstantDecay	RMSprop		decay_steps=100000, decay_rate=0.96,	Tak	0.13555	0.925767	9.23565	0.0320854	1.11358	7.2337	55.7938	2.42891	1.5166	10.6513	59.4099	3.94759	0.10091	0.690872	6.6605	0.0188495	1.10974	7.91476	48.9572	2.42053	1.10265	7.93354	52.4677	2.43892
0.5	Rendering 1	dataset09.01.2023	sieć mobilna A	MobileNet V3 Small	224		4	Poisson noise (strength 0.1)	650	0	5000	0	115	0	0	115	0	Tak	CosineDecay	RMSprop	1		Tak	0.821	7.109	40.108	1.375	1.443	9.882	81.03	3.3	1.431	9.761	80.633	3.44	0.834	7.198	41.163	1.39	1.309	8.817	70.129	2.948	1.366	9.234	88.349	3.208
0.5	Rendering 1	dataset09.01.2023	sieć mobilna A	MobileNet V3 Small	224		4	Poisson noise (strength 0.1)	650	0	2500	0	115	0	0	115	0	Tak	CosineDecay	RMSprop	1		Tak	0.819	6.858	41.001	1.352	1.223	8.57	61.174	2.648	1.279	8.834	67.81	2.792	0.811	6.827	41.985	1.308	1.467	9.607	69.306	3.787	1.408	9.324	64.175	3.677
0.5	Rendering 1	dataset09.01.2023	sieć mobilna A	MobileNet V3 Small	224		4	Poisson noise (strength 0.1)	650	0	0	0	115	0	0	115	0	Tak	CosineDecay	RMSprop	1		Tak	0.603	3.835	38.964	0.67	1.268	8.719	57.568	3.144	1.328	8.997	63.921	3.304	0.628	4.038	40.179	0.73	1.381	9.221	59.014	3.43	1.34	9.015	62.23	3.26
0.5	Rendering 1	dataset09.01.2023	sieć mobilna A	MobileNet V3 Small	224		4	Poisson noise (strength 0.1)	650	0	5000	0	115	0	0	115	0	Tak	CosineDecay	RMSprop	1		Nie	0.276	2.588	13.859	0.164	0.857	6.507	54.959	1.396	0.893	6.816	54.95	1.503	0.273	2.543	13.845	0.158	0.827	6.152	40.456	1.413	0.809	6.16	41.059	1.411
0.5	Rendering 1	dataset09.01.2023	sieć mobilna A	MobileNet V3 Small	224		4	Poisson noise (strength 0.1)	650	0	2500	0	115	0	0	115	0	Tak	CosineDecay	RMSprop	1		Nie	0.26	2.378	13.388	0.145	0.982	6.848	136.117	1.627	0.934	6.535	121.429	1.404	0.263	2.412	13.511	0.148	0.722	5.277	55.628	0.899	0.719	5.338	49.105	0.961
0.5	Rendering 1	dataset09.01.2023	sieć mobilna A	MobileNet V3 Small	224		4	Poisson noise (strength 0.1)	650	0	0	0	115	0	0	115	0	Tak	CosineDecay	RMSprop	1		Nie	0.261	1.753	16.938	0.122	0.821	6.285	40.738	1.458	0.854	6.513	42.742	1.506	0.225	1.511	14.542	0.092	1.021	7.389	46.417	1.867	0.993	7.16	46.271	1.797
0.5	Rendering 1	dataset09.01.2023	sieć mobilna A	MobileNet V3 Small	224	2	4	Poisson noise (strength 0.1)	650	0	5000	0	115	0	0	115	0	Tak	ExponentialDecay	RMSprop				0.429909	3.91466	21.6275	0.380728	0.831847	6.24201	52.9377	1.30506	0.867292	6.35191	61.8111	1.30879	0.374571	3.5036	18.7402	0.293048	0.946007	7.09347	48.5542	1.72369	0.993231	7.31409	53.3856	1.83132
0.5	Rendering 1	dataset09.01.2023	sieć mobilna A	MobileNet V3 Small	224	2	4	Poisson noise (strength 0.1)	650	0	2500	0	115	0	0	115	0	Tak	ExponentialDecay	RMSprop				0.516365	4.62617	26.3444	0.534626	0.997636	7.35869	48.2674	1.82277	0.960437	7.07024	48.7838	1.71251	0.449612	4.0581	23.1008	0.415432	0.899115	6.83521	44.7225	1.54922	0.913223	6.9108	45.7988	1.62747
0.5	Rendering 1	dataset09.01.2023	sieć mobilna A	MobileNet V3 Small	224	2	4	Poisson noise (strength 0.1)	650	0	0	0	115	0	0	115	0	Tak	ExponentialDecay	RMSprop				0.601515	3.88251	38.394	0.653208	1.23247	8.59544	56.7851	2.62112	1.18122	8.22869	57.4111	2.47328	0.506402	3.27756	32.6076	0.444323	1.43874	9.63595	57.2037	3.44948	1.39131	9.36284	55.8662	3.39348
0.5	Rendering 1	dataset09.01.2023	sieć mobilna A	MobileNet V3 Small	224	2	4	Poisson noise (strength 0.1)	650	0	5000	0	115	0	0	115	0	Tak	ExponentialDecay	RMSprop				2.41922	15.3648	91.0421	8.67599	1.9753	11.5465	71.4694	6.01746	1.92634	11.2085	70.8935	5.81143	2.42023	15.3681	90.9127	8.68557	1.94739	11.5583	71.0857	5.97395	1.89047	11.2496	70.2238	5.83946
0.5	Rendering 1	dataset09.01.2023	sieć mobilna A	MobileNet V3 Small	224	2	4	Poisson noise (strength 0.1)	650	0	2500	0	115	0	0	115	0	Tak	ExponentialDecay	RMSprop				2.43936	14.9265	85.6565	8.90165	2.07976	11.8275	74.6951	6.47568	2.02771	11.4813	73.6849	6.25837	2.30323	14.5573	89.6787	8.0186	1.91089	11.4517	70.164	5.81359	1.85839	11.1559	69.8604	5.68604
0.5	Rendering 1	dataset09.01.2023	sieć mobilna A	MobileNet V3 Small	224	2	4	Poisson noise (strength 0.1)	650	0	0	0	115	0	0	115	0	Tak	ExponentialDecay	RMSprop				0.751443	4.74729	48.4365	1.07909	17922	332147392	5987196928	332027296	18351.8	348219488	6514675712	348099008	1.03249	6.0793	58.1247	1.78114	1527.09	2.4592e+06	37697920	2448671	1537.39	2505783	42350512	2.4953e+06
0.5	Rendering 1	dataset09.01.2023	sieć mobilna A	MobileNet V3 Small	224	1.66667	3	Rotation	650	0	5000	0	115	0	0	115	0	Tak	PiecewiseConstantDecay	Adam	1e-05	decay_steps=100000, decay_rate=0.96,	Tak	1.30496	10.0381	62.2494	3.11833	1.74249	10.8051	63.9035	5.42341	1.69303	10.2342	66.4224	4.68626	1.14353	9.01325	56.3757	2.41674	1.93762	11.5872	71.2807	5.99271	1.78007	10.3506	67.0454	5.10238
0.5	Rendering 1	dataset09.01.2023	sieć mobilna A	MobileNet V3 Small	224	1.66667	3	Rotation	650	0	2500	0	115	0	0	115	0	Tak	PiecewiseConstantDecay	Adam	1e-05	decay_steps=100000, decay_rate=0.96,	Tak	1.33105	9.91329	69.1301	3.19004	1.66217	10.5026	63.1778	4.94503	1.63297	10.0386	66.1242	4.42429	1.33019	9.82351	67.0263	3.1665	2.0307	11.8286	72.858	6.63768	1.92262	10.7775	73.6497	5.81404
0.5	Rendering 1	dataset09.01.2023	sieć mobilna A	MobileNet V3 Small	224	1.66667	3	Rotation	650	0	0	0	115	0	0	115	0	Tak	PiecewiseConstantDecay	Adam	1e-05	decay_steps=100000, decay_rate=0.96,	Tak	1.1118	6.2985	70.1055	1.94055	1.89867	11.9836	71.6092	5.69946	1.77506	11.2757	69.5302	5.59648	1.0371	5.97687	68.2191	1.75886	1.97657	12.0953	76.7422	6.20503	1.82716	11.1344	69.4264	5.48444
0.5	Rendering 1	dataset09.01.2023	sieć mobilna A	MobileNet V3 Small	224	1.66667	3	Rotation	650	0	5000	0	115	0	0	115	0	Tak	PiecewiseConstantDecay	Adam	1e-05	decay_steps=100000, decay_rate=0.96,	Nie	1.30496	10.0381	62.2494	3.11833	1.74249	10.8051	63.9035	5.42341	1.69303	10.2342	66.4224	4.68626	1.14353	9.01325	56.3757	2.41674	1.93762	11.5872	71.2807	5.99271	1.78007	10.3506	67.0454	5.10238
0.5	Rendering 1	dataset09.01.2023	sieć mobilna A	MobileNet V3 Small	224	1.66667	3	Rotation	650	0	2500	0	115	0	0	115	0	Tak	PiecewiseConstantDecay	Adam	1e-05	decay_steps=100000, decay_rate=0.96,	Nie	1.33105	9.91329	69.1301	3.19004	1.66217	10.5026	63.1778	4.94503	1.63297	10.0386	66.1242	4.42429	1.33019	9.82351	67.0263	3.1665	2.0307	11.8286	72.858	6.63768	1.92262	10.7775	73.6497	5.81404
0.5	Rendering 1	dataset09.01.2023	sieć mobilna A	MobileNet V3 Small	224	1.66667	3	Rotation	650	0	0	0	115	0	0	115	0	Tak	PiecewiseConstantDecay	Adam	1e-05	decay_steps=100000, decay_rate=0.96,	Nie	1.1118	6.2985	70.1055	1.94055	1.89867	11.9836	71.6092	5.69946	1.77506	11.2757	69.5302	5.59648	1.0371	5.97687	68.2191	1.75886	1.97657	12.0953	76.7422	6.20503	1.82716	11.1344	69.4264	5.48444
0.5	Rendering 1	dataset09.01.2023	sieć mobilna A	MobileNet V3 Small	224	1.66667	3	Rotation	650	0	5000	0	115	0	0	115	0	Tak	PiecewiseConstantDecay	Adam	0.001	decay_steps=100000, decay_rate=0.96,	Tak	0.474909	4.26933	23.9099	0.481692	2.01804	11.6752	77.1183	5.82693	1.98447	11.6103	75.4622	5.81262	0.464751	4.21552	23.2632	0.466831	2.20855	12.5721	81.3351	6.73179	1.98594	10.4527	80.5134	5.43993
0.5	Rendering 1	dataset09.01.2023	sieć mobilna A	MobileNet V3 Small	224	1.66667	3	Rotation	650	0	2500	0	115	0	0	115	0	Tak	PiecewiseConstantDecay	Adam	0.001	decay_steps=100000, decay_rate=0.96,	Tak	0.519017	4.53037	26.4547	0.567494	1.89417	11.2837	73.0734	5.26497	1.89978	11.3694	72.3524	5.48753	0.49576	4.38036	24.8886	0.514297	2.31281	12.8389	82.0045	7.39252	2.04944	10.6123	81.0383	5.82823
0.5	Rendering 1	dataset09.01.2023	sieć mobilna A	MobileNet V3 Small	224	1.66667	3	Rotation	650	0	0	0	115	0	0	115	0	Tak	PiecewiseConstantDecay	Adam	0.001	decay_steps=100000, decay_rate=0.96,	Tak	0.591955	3.85383	38.3075	0.626778	1.32031	9.18825	62.8584	3.06766	1.32209	9.21629	64.3909	3.13156	0.687435	4.4435	42.064	0.898194	1.57255	10.5537	58.9448	4.1713	1.36079	8.56145	57.4637	3.22689
0.5	Rendering 1	dataset09.01.2023	sieć mobilna A	MobileNet V3 Small	224	1.66667	3	Rotation	650	0	5000	0	115	0	0	115	0	Tak	PiecewiseConstantDecay	Adam	0.001	decay_steps=100000, decay_rate=0.96,	Nie	0.474909	4.26933	23.9099	0.481692	2.01804	11.6752	77.1183	5.82693	1.98447	11.6103	75.4622	5.81262	0.464751	4.21552	23.2632	0.466831	2.20855	12.5721	81.3351	6.73179	1.98594	10.4527	80.5134	5.43993
0.5	Rendering 1	dataset09.01.2023	sieć mobilna A	MobileNet V3 Small	224	1.66667	3	Rotation	650	0	2500	0	115	0	0	115	0	Tak	PiecewiseConstantDecay	Adam	0.001	decay_steps=100000, decay_rate=0.96,	Nie	0.519017	4.53037	26.4547	0.567494	1.89417	11.2837	73.0734	5.26497	1.89978	11.3694	72.3524	5.48753	0.49576	4.38036	24.8886	0.514297	2.31281	12.8389	82.0045	7.39252	2.04944	10.6123	81.0383	5.82823
0.5	Rendering 1	dataset09.01.2023	sieć mobilna A	MobileNet V3 Small	224	1.66667	3	Rotation	650	0	0	0	115	0	0	115	0	Tak	PiecewiseConstantDecay	Adam	0.001	decay_steps=100000, decay_rate=0.96,	Nie	0.591955	3.85383	38.3075	0.626778	1.32031	9.18825	62.8584	3.06766	1.32209	9.21629	64.3909	3.13156	0.687435	4.4435	42.064	0.898194	1.57255	10.5537	58.9448	4.1713	1.36079	8.56145	57.4637	3.22689
0.5	Rendering 1	dataset09.01.2023	sieć mobilna A	MobileNet V3 Small	224	2	3	Rotation	650	0	5000	0	115	0	0	115	0	Tak	ExponentialDecay	Adam	1e-05	decay_steps=100000, decay_rate=0.96,	Tak	0.66339	5.83072	33.0473	0.892707	1.74582	10.6175	66.9595	4.93437	2.03856	12.9442	71.0066	6.26397	0.498574	4.50251	24.9663	0.517601	1.70264	9.90881	67.521	4.47123	1.83776	11.267	69.0773	5.19297
0.5	Rendering 1	dataset09.01.2023	sieć mobilna A	MobileNet V3 Small	224	2	3	Rotation	650	0	2500	0	115	0	0	115	0	Tak	ExponentialDecay	Adam	1e-05	decay_steps=100000, decay_rate=0.96,	Tak	0.888597	7.25196	44.8268	1.53233	1.78359	10.7606	65.9455	5.34777	2.06953	13.0502	70.429	6.56922	0.641667	5.46689	33.4045	0.809602	1.79308	10.1636	69.9822	4.94461	1.94493	11.6104	71.9468	5.8137
0.5	Rendering 1	dataset09.01.2023	sieć mobilna A	MobileNet V3 Small	224	2	3	Rotation	650	0	0	0	115	0	0	115	0	Tak	ExponentialDecay	Adam	1e-05	decay_steps=100000, decay_rate=0.96,	Tak	0.882962	5.27102	58.78	1.3933	1.33132	9.00786	63.3078	3.26681	1.60457	11.3119	63.6909	4.40674	0.757026	4.70629	47.2999	1.01166	1.32618	8.48965	61.2678	3.04497	1.46321	9.85431	59.9784	3.78758
0.5	Rendering 1	dataset09.01.2023	sieć mobilna A	MobileNet V3 Small	224	2	3	Rotation	650	0	5000	0	115	0	0	115	0	Tak	ExponentialDecay	Adam	0.001	decay_steps=100000, decay_rate=0.96,	Tak	0.359729	3.32732	17.6714	0.298723	1.33846	9.07577	51.6694	3.24404	1.59989	11.167	58.0123	4.13975	0.307854	2.85987	15.1502	0.23704	1.56412	9.22215	82.921	4.13104	1.61947	10.2165	80.4284	4.53748
0.5	Rendering 1	dataset09.01.2023	sieć mobilna A	MobileNet V3 Small	224	2	3	Rotation	650	0	2500	0	115	0	0	115	0	Tak	ExponentialDecay	Adam	0.001	decay_steps=100000, decay_rate=0.96,	Tak	0.44359	3.98071	22.514	0.426903	1.53372	9.89863	59.8069	3.88229	1.78111	11.9948	64.8451	4.80608	0.344518	3.13681	17.2731	0.261684	1.61452	9.64871	63.8838	4.08762	1.76274	11.0741	65.8521	4.94053
0.5	Rendering 1	dataset09.01.2023	sieć mobilna A	MobileNet V3 Small	224	2	3	Rotation	650	0	0	0	115	0	0	115	0	Tak	ExponentialDecay	Adam	0.001	decay_steps=100000, decay_rate=0.96,	Tak	0.505332	3.35734	31.2393	0.493054	1.86677	11.0683	68.8225	5.58051	2.21025	13.5486	75.3961	7.06559	0.4235	2.78936	27.0148	0.323753	1.89865	10.5446	72.0944	5.48037	2.07531	12.048	74.8499	6.50877
0.5	Rendering 1	dataset09.01.2023	sieć mobilna A	MobileNet V3 Small	224	1.66667	3	Rotation	650	0	5000	0	115	0	0	115	0	Tak	PiecewiseConstantDecay	RMSprop	1e-05	decay_steps=100000, decay_rate=0.96,	Tak	0.835096	6.98562	42.6602	1.36733	1.78388	11.5813	63.0956	5.18773	1.67937	10.9343	64.1334	4.93394	0.825855	6.96053	42.1365	1.33972	1.72972	11.2711	63.0028	5.07023	1.67359	10.612	64.4304	4.73851
0.5	Rendering 1	dataset09.01.2023	sieć mobilna A	MobileNet V3 Small	224	1.66667	3	Rotation	650	0	2500	0	115	0	0	115	0	Tak	PiecewiseConstantDecay	RMSprop	1e-05	decay_steps=100000, decay_rate=0.96,	Tak	1.08696	8.65125	55.4999	2.19876	1.73222	11.3458	64.7961	4.84368	1.58964	10.5233	61.6614	4.56816	1.05969	8.41699	54.8824	2.07081	1.77697	11.4018	66.2848	5.30818	1.73515	10.8193	65.2498	5.07597
0.5	Rendering 1	dataset09.01.2023	sieć mobilna A	MobileNet V3 Small	224	1.66667	3	Rotation	650	0	0	0	115	0	0	115	0	Tak	PiecewiseConstantDecay	RMSprop	1e-05	decay_steps=100000, decay_rate=0.96,	Tak	1.10064	6.25644	70.3716	1.95826	1.87007	11.7364	67.3165	5.60181	1.68958	10.8313	65.0357	4.92326	1.10868	6.51555	78.0402	2.01519	1.74355	11.1512	68.8892	5.05553	1.68551	10.5437	68.0461	4.66571
0.5	Rendering 1	dataset09.01.2023	sieć mobilna A	MobileNet V3 Small	224	1.66667	3	Rotation	650	0	5000	0	115	0	0	115	0	Tak	PiecewiseConstantDecay	RMSprop	1e-05	decay_steps=100000, decay_rate=0.96,	Nie	0.835096	6.98562	42.6602	1.36733	1.78388	11.5813	63.0956	5.18773	1.67937	10.9343	64.1334	4.93394	0.825855	6.96053	42.1365	1.33972	1.72972	11.2711	63.0028	5.07023	1.67359	10.612	64.4304	4.73851
0.5	Rendering 1	dataset09.01.2023	sieć mobilna A	MobileNet V3 Small	224	1.66667	3	Rotation	650	0	2500	0	115	0	0	115	0	Tak	PiecewiseConstantDecay	RMSprop	1e-05	decay_steps=100000, decay_rate=0.96,	Nie	1.08696	8.65125	55.4999	2.19876	1.73222	11.3458	64.7961	4.84368	1.58964	10.5233	61.6614	4.56816	1.05969	8.41699	54.8824	2.07081	1.77697	11.4018	66.2848	5.30818	1.73515	10.8193	65.2498	5.07597
0.5	Rendering 1	dataset09.01.2023	sieć mobilna A	MobileNet V3 Small	224	1.66667	3	Rotation	650	0	0	0	115	0	0	115	0	Tak	PiecewiseConstantDecay	RMSprop	1e-05	decay_steps=100000, decay_rate=0.96,	Nie	1.10064	6.25644	70.3716	1.95826	1.87007	11.7364	67.3165	5.60181	1.68958	10.8313	65.0357	4.92326	1.10868	6.51555	78.0402	2.01519	1.74355	11.1512	68.8892	5.05553	1.68551	10.5437	68.0461	4.66571
0.5	Rendering 1	dataset09.01.2023	sieć mobilna A	MobileNet V3 Small	224	1.66667	3	Rotation	650	0	5000	0	115	0	0	115	0	Tak	PiecewiseConstantDecay	RMSprop	0.001	decay_steps=100000, decay_rate=0.96,	Tak	0.314248	2.91689	15.6926	0.2158	1.6464	10.681	67.5476	3.56977	1.56956	10.1668	66.564	3.53967	0.29799	2.76594	14.9625	0.193999	1.6465	10.7172	66.8847	3.8868	1.63601	10.2925	67.6617	3.84238
0.5	Rendering 1	dataset09.01.2023	sieć mobilna A	MobileNet V3 Small	224	1.66667	3	Rotation	650	0	2500	0	115	0	0	115	0	Tak	PiecewiseConstantDecay	RMSprop	0.001	decay_steps=100000, decay_rate=0.96,	Tak	0.409136	3.69693	20.9347	0.364231	1.53364	10.4591	62.3479	3.53468	1.38593	9.65777	58.374	3.27434	0.363088	3.28616	18.2437	0.290187	1.48326	10.3197	59.7244	3.67979	1.41791	9.66644	56.6952	3.44002
0.5	Rendering 1	dataset09.01.2023	sieć mobilna A	MobileNet V3 Small	224	1.66667	3	Rotation	650	0	0	0	115	0	0	115	0	Tak	PiecewiseConstantDecay	RMSprop	0.001	decay_steps=100000, decay_rate=0.96,	Tak	0.549159	3.59506	35.6775	0.578776	1.67402	11.1952	62.2514	4.24841	1.52941	10.367	60.7682	3.93023	0.492193	3.26342	31.4541	0.462154	1.86688	11.7668	69.3424	5.31111	1.7714	10.9697	66.1508	4.84803
0.5	Rendering 1	dataset09.01.2023	sieć mobilna A	MobileNet V3 Small	224	1.66667	3	Rotation	650	0	5000	0	115	0	0	115	0	Tak	PiecewiseConstantDecay	RMSprop	0.001	decay_steps=100000, decay_rate=0.96,	Nie	0.314248	2.91689	15.6926	0.2158	1.6464	10.681	67.5476	3.56977	1.56956	10.1668	66.564	3.53967	0.29799	2.76594	14.9625	0.193999	1.6465	10.7172	66.8847	3.8868	1.63601	10.2925	67.6617	3.84238
0.5	Rendering 1	dataset09.01.2023	sieć mobilna A	MobileNet V3 Small	224	1.66667	3	Rotation	650	0	2500	0	115	0	0	115	0	Tak	PiecewiseConstantDecay	RMSprop	0.001	decay_steps=100000, decay_rate=0.96,	Nie	0.409136	3.69693	20.9347	0.364231	1.53364	10.4591	62.3479	3.53468	1.38593	9.65777	58.374	3.27434	0.363088	3.28616	18.2437	0.290187	1.48326	10.3197	59.7244	3.67979	1.41791	9.66644	56.6952	3.44002
0.5	Rendering 1	dataset09.01.2023	sieć mobilna A	MobileNet V3 Small	224	1.66667	3	Rotation	650	0	0	0	115	0	0	115	0	Tak	PiecewiseConstantDecay	RMSprop	0.001	decay_steps=100000, decay_rate=0.96,	Nie	0.549159	3.59506	35.6775	0.578776	1.67402	11.1952	62.2514	4.24841	1.52941	10.367	60.7682	3.93023	0.492193	3.26342	31.4541	0.462154	1.86688	11.7668	69.3424	5.31111	1.7714	10.9697	66.1508	4.84803
0.5	Rendering 1	dataset09.01.2023	sieć mobilna A	MobileNet V3 Small	224	2	3	Rotation	650	0	5000	0	115	0	0	115	0	Tak	ExponentialDecay	RMSprop	1e-05	decay_steps=100000, decay_rate=0.96,	Tak	0.590062	5.22207	29.9602	0.715204	1.3173	8.87532	61.8743	3.23812	1.27926	8.79175	57.8223	3.00221	0.477651	4.33178	24.0895	0.49005	1.57765	10.488	60.9679	4.11455	1.55723	10.3383	63.8883	4.20457
0.5	Rendering 1	dataset09.01.2023	sieć mobilna A	MobileNet V3 Small	224	2	3	Rotation	650	0	2500	0	115	0	0	115	0	Tak	ExponentialDecay	RMSprop	1e-05	decay_steps=100000, decay_rate=0.96,	Tak	0.744203	6.25853	38.4152	1.10325	1.35174	9.0073	61.6847	3.2532	1.31773	8.95551	57.6207	3.14377	0.560451	4.83453	29.6941	0.630341	1.44956	9.87986	57.7892	3.59924	1.44151	9.78974	62.4485	3.72198
0.5	Rendering 1	dataset09.01.2023	sieć mobilna A	MobileNet V3 Small	224	2	3	Rotation	650	0	0	0	115	0	0	115	0	Tak	ExponentialDecay	RMSprop	1e-05	decay_steps=100000, decay_rate=0.96,	Tak	0.809676	5.04453	54.5539	1.12509	1.29488	8.80368	59.0724	2.94648	1.29503	8.79224	56.2003	2.86683	0.66364	4.16122	44.0882	0.764753	1.44371	9.86523	59.1712	3.36637	1.4048	9.656	63.6382	3.43169
0.5	Rendering 1	dataset09.01.2023	sieć mobilna A	MobileNet V3 Small	224	2	3	Rotation	650	0	5000	0	115	0	0	115	0	Tak	ExponentialDecay	RMSprop	0.001	decay_steps=100000, decay_rate=0.96,	Tak	0.378171	3.59394	17.949	0.317896	1.13894	7.59451	54.362	2.14653	1.18024	7.83104	51.8864	2.51133	0.312184	2.9482	15.0501	0.222566	2.70755	25.5525	576.864	10.8925	2.90259	27.95	698.964	12.6315
0.5	Rendering 1	dataset09.01.2023	sieć mobilna A	MobileNet V3 Small	224	2	3	Rotation	650	0	2500	0	115	0	0	115	0	Tak	ExponentialDecay	RMSprop	0.001	decay_steps=100000, decay_rate=0.96,	Tak	0.376158	3.40412	18.9564	0.312988	0.912593	6.16825	54.3561	1.34554	0.973178	7.17605	51.4191	1.58455	0.312617	2.85607	15.628	0.228782	1.16307	7.90808	112.697	2.18466	1.25626	9.12795	88.4168	2.68288
0.5	Rendering 1	dataset09.01.2023	sieć mobilna A	MobileNet V3 Small	224	2	3	Rotation	650	0	0	0	115	0	0	115	0	Tak	ExponentialDecay	RMSprop	0.001	decay_steps=100000, decay_rate=0.96,	Tak	0.581053	3.80086	36.0328	0.596355	2.20989	16.313	286.119	7.92764	2.30049	16.5799	248.249	8.01281	0.403969	2.7051	25.916	0.30453	1.41965	8.89659	59.7021	3.17258	1.56111	10.3266	60.2756	3.96237
0.5	Rendering 1	dataset09.01.2023	sieć mobilna A	MobileNet V3 Small	224	1.66667	2	Rotation 90° x	650	0	5000	0	115	0	0	115	0	Tak	PiecewiseConstantDecay	Adam	1e-05	decay_steps=100000, decay_rate=0.96,	Tak	0.796654	6.70983	41.3069	1.21805	1.16907	8.51748	56.9126	2.4487	1.19039	8.63514	63.4035	2.61138	0.807255	6.78316	41.8324	1.24595	1.21044	8.68045	63.7492	2.66966	1.14867	8.16984	53.7174	2.49835
0.5	Rendering 1	dataset09.01.2023	sieć mobilna A	MobileNet V3 Small	224	1.66667	2	Rotation 90° x	650	0	2500	0	115	0	0	115	0	Tak	PiecewiseConstantDecay	Adam	1e-05	decay_steps=100000, decay_rate=0.96,	Tak	0.910718	7.33437	48.5016	1.53908	1.2988	9.32611	58.629	2.90393	1.23979	8.98366	58.3317	2.90657	0.916116	7.42631	48.3873	1.5464	1.29892	9.29911	60.6917	2.94272	1.24532	8.77249	53.9073	2.91867
0.5	Rendering 1	dataset09.01.2023	sieć mobilna A	MobileNet V3 Small	224	1.66667	2	Rotation 90° x	650	0	0	0	115	0	0	115	0	Tak	PiecewiseConstantDecay	Adam	1e-05	decay_steps=100000, decay_rate=0.96,	Tak	0.919413	5.27535	60.3025	1.38125	1.53395	10.4356	58.0195	3.86428	1.4758	9.97309	58.7445	3.69205	0.985317	5.78181	65.9214	1.64709	1.53752	10.3989	59.2275	3.89251	1.48372	9.78828	58.1298	3.71068
0.5	Rendering 1	dataset09.01.2023	sieć mobilna A	MobileNet V3 Small	224	1.66667	2	Rotation 90° x	650	0	5000	0	115	0	0	115	0	Tak	PiecewiseConstantDecay	Adam	1e-05	decay_steps=100000, decay_rate=0.96,	Nie	0.796654	6.70983	41.3069	1.21805	1.16907	8.51748	56.9126	2.4487	1.19039	8.63514	63.4035	2.61138	0.807255	6.78316	41.8324	1.24595	1.21044	8.68045	63.7492	2.66966	1.14867	8.16984	53.7174	2.49835
0.5	Rendering 1	dataset09.01.2023	sieć mobilna A	MobileNet V3 Small	224	1.66667	2	Rotation 90° x	650	0	2500	0	115	0	0	115	0	Tak	PiecewiseConstantDecay	Adam	1e-05	decay_steps=100000, decay_rate=0.96,	Nie	0.910718	7.33437	48.5016	1.53908	1.2988	9.32611	58.629	2.90393	1.23979	8.98366	58.3317	2.90657	0.916116	7.42631	48.3873	1.5464	1.29892	9.29911	60.6917	2.94272	1.24532	8.77249	53.9073	2.91867
0.5	Rendering 1	dataset09.01.2023	sieć mobilna A	MobileNet V3 Small	224	1.66667	2	Rotation 90° x	650	0	0	0	115	0	0	115	0	Tak	PiecewiseConstantDecay	Adam	1e-05	decay_steps=100000, decay_rate=0.96,	Nie	0.919413	5.27535	60.3025	1.38125	1.53395	10.4356	58.0195	3.86428	1.4758	9.97309	58.7445	3.69205	0.985317	5.78181	65.9214	1.64709	1.53752	10.3989	59.2275	3.89251	1.48372	9.78828	58.1298	3.71068
0.5	Rendering 1	dataset09.01.2023	sieć mobilna A	MobileNet V3 Small	224	1.66667	2	Rotation 90° x	650	0	5000	0	115	0	0	115	0	Tak	PiecewiseConstantDecay	Adam	0.001	decay_steps=100000, decay_rate=0.96,	Tak	0.305349	2.86145	15.4054	0.195489	0.96943	7.41315	46.2075	1.53835	0.88839	6.99606	40.8768	1.55411	0.284915	2.6759	14.2246	0.172524	0.939691	7.24681	42.659	1.5813	0.921624	6.88807	43.582	1.51735
0.5	Rendering 1	dataset09.01.2023	sieć mobilna A	MobileNet V3 Small	224	1.66667	2	Rotation 90° x	650	0	2500	0	115	0	0	115	0	Tak	PiecewiseConstantDecay	Adam	0.001	decay_steps=100000, decay_rate=0.96,	Tak	0.309371	2.82159	15.9285	0.202433	0.959515	7.18849	48.7566	1.56359	0.85295	6.67411	43.3476	1.49384	0.307057	2.81857	15.7112	0.19986	0.877522	6.6973	40.9965	1.50302	0.828545	6.20865	40.2392	1.3424
0.5	Rendering 1	dataset09.01.2023	sieć mobilna A	MobileNet V3 Small	224	1.66667	2	Rotation 90° x	650	0	0	0	115	0	0	115	0	Tak	PiecewiseConstantDecay	Adam	0.001	decay_steps=100000, decay_rate=0.96,	Tak	0.418079	2.68989	27.2145	0.327702	1.13567	8.42421	51.7588	2.19229	1.01297	7.76614	45.7743	2.08581	0.411293	2.83728	26.5943	0.316876	1.42461	9.86723	57.4098	3.33733	1.39797	9.3705	57.4325	3.21791
0.5	Rendering 1	dataset09.01.2023	sieć mobilna A	MobileNet V3 Small	224	1.66667	2	Rotation 90° x	650	0	5000	0	115	0	0	115	0	Tak	PiecewiseConstantDecay	Adam	0.001	decay_steps=100000, decay_rate=0.96,	Nie	0.305349	2.86145	15.4054	0.195489	0.96943	7.41315	46.2075	1.53835	0.88839	6.99606	40.8768	1.55411	0.284915	2.6759	14.2246	0.172524	0.939691	7.24681	42.659	1.5813	0.921624	6.88807	43.582	1.51735
0.5	Rendering 1	dataset09.01.2023	sieć mobilna A	MobileNet V3 Small	224	1.66667	2	Rotation 90° x	650	0	2500	0	115	0	0	115	0	Tak	PiecewiseConstantDecay	Adam	0.001	decay_steps=100000, decay_rate=0.96,	Nie	0.309371	2.82159	15.9285	0.202433	0.959515	7.18849	48.7566	1.56359	0.85295	6.67411	43.3476	1.49384	0.307057	2.81857	15.7112	0.19986	0.877522	6.6973	40.9965	1.50302	0.828545	6.20865	40.2392	1.3424
0.5	Rendering 1	dataset09.01.2023	sieć mobilna A	MobileNet V3 Small	224	1.66667	2	Rotation 90° x	650	0	0	0	115	0	0	115	0	Tak	PiecewiseConstantDecay	Adam	0.001	decay_steps=100000, decay_rate=0.96,	Nie	0.418079	2.68989	27.2145	0.327702	1.13567	8.42421	51.7588	2.19229	1.01297	7.76614	45.7743	2.08581	0.411293	2.83728	26.5943	0.316876	1.42461	9.86723	57.4098	3.33733	1.39797	9.3705	57.4325	3.21791
0.5	Rendering 1	dataset09.01.2023	sieć mobilna A	MobileNet V3 Small	224	2	2	Rotation 90° x	650	0	5000	0	115	0	0	115	0	Tak	ExponentialDecay	Adam	1e-05	decay_steps=100000, decay_rate=0.96,	Tak	0.506451	4.53048	25.9202	0.515725	0.950475	7.02775	46.7496	1.75797	0.992147	7.28589	46.9851	1.79403	0.343946	3.12346	17.8505	0.240754	0.976313	7.43532	46.0462	1.80599	1.01125	7.63733	46.436	1.97927
0.5	Rendering 1	dataset09.01.2023	sieć mobilna A	MobileNet V3 Small	224	2	2	Rotation 90° x	650	0	2500	0	115	0	0	115	0	Tak	ExponentialDecay	Adam	1e-05	decay_steps=100000, decay_rate=0.96,	Tak	0.652832	5.58744	34.2292	0.856464	0.915589	6.68471	56.093	1.48752	0.891527	6.66984	48.6363	1.48961	0.480873	4.22889	25.1917	0.465668	0.903573	6.86642	48.6807	1.58407	0.939107	7.11206	47.6866	1.72148
0.5	Rendering 1	dataset09.01.2023	sieć mobilna A	MobileNet V3 Small	224	2	2	Rotation 90° x	650	0	0	0	115	0	0	115	0	Tak	ExponentialDecay	Adam	1e-05	decay_steps=100000, decay_rate=0.96,	Tak	0.726646	4.50039	47.6076	0.902827	0.996955	7.25422	51.4591	1.81786	0.931806	6.94901	45.2653	1.63196	0.561044	3.63247	36.9731	0.580225	1.06753	7.96049	48.2272	2.1346	1.06095	7.87597	47.9899	2.21107
0.5	Rendering 1	dataset09.01.2023	sieć mobilna A	MobileNet V3 Small	224	2	2	Rotation 90° x	650	0	5000	0	115	0	0	115	0	Tak	ExponentialDecay	Adam	0.001	decay_steps=100000, decay_rate=0.96,	Tak	0.228043	2.14215	11.4641	0.117088	1.04084	7.60521	47.8503	1.91574	1.07216	7.8247	48.2626	1.99817	0.424278	3.84861	21.2	0.421771	2.80807	13.7634	93.5192	10.2724	2.70543	13.3407	91.6824	9.97737
0.5	Rendering 1	dataset09.01.2023	sieć mobilna A	MobileNet V3 Small	224	2	2	Rotation 90° x	650	0	2500	0	115	0	0	115	0	Tak	ExponentialDecay	Adam	0.001	decay_steps=100000, decay_rate=0.96,	Tak	0.256982	2.35561	13.1997	0.136896	0.987921	7.04096	45.392	1.69341	1.00572	7.22178	45.0619	1.80824	0.189341	1.74801	9.79474	0.0756617	0.978209	7.48398	44.386	1.71018	0.960981	7.33649	43.5479	1.64707
0.5	Rendering 1	dataset09.01.2023	sieć mobilna A	MobileNet V3 Small	224	2	2	Rotation 90° x	650	0	0	0	115	0	0	115	0	Tak	ExponentialDecay	Adam	0.001	decay_steps=100000, decay_rate=0.96,	Tak	0.369241	2.41625	24.136	0.244649	0.807476	5.96686	58.1241	1.06868	0.784601	5.95854	53.9991	1.09525	0.315361	2.07472	21.6298	0.173791	1.24413	8.99059	49.7379	2.6752	1.21231	8.74614	49.3528	2.60773
0.5	Rendering 1	dataset09.01.2023	sieć mobilna A	MobileNet V3 Small	224	1.66667	2	Rotation 90° x	650	0	5000	0	115	0	0	115	0	Tak	PiecewiseConstantDecay	RMSprop	1e-05	decay_steps=100000, decay_rate=0.96,	Tak	0.706896	6.14151	37.0179	0.962897	1.16106	8.19748	60.3634	2.32613	1.19324	8.48794	63.6693	2.62897	0.721141	6.28794	37.1002	1.02328	1.19039	8.44921	61.8449	2.54049	1.08328	7.38543	60.5903	2.11966
0.5	Rendering 1	dataset09.01.2023	sieć mobilna A	MobileNet V3 Small	224	1.66667	2	Rotation 90° x	650	0	2500	0	115	0	0	115	0	Tak	PiecewiseConstantDecay	RMSprop	1e-05	decay_steps=100000, decay_rate=0.96,	Tak	0.777149	6.46371	41.7477	1.15761	1.10555	7.92317	59.7117	2.14991	1.16588	8.41743	65.5293	2.40676	0.775404	6.54051	42.3872	1.14609	1.2482	8.824	61.4644	2.8541	1.13389	7.69192	61.043	2.29885
0.5	Rendering 1	dataset09.01.2023	sieć mobilna A	MobileNet V3 Small	224	1.66667	2	Rotation 90° x	650	0	0	0	115	0	0	115	0	Tak	PiecewiseConstantDecay	RMSprop	1e-05	decay_steps=100000, decay_rate=0.96,	Tak	0.915923	5.34199	59.7217	1.38158	1.44833	9.55873	58.8071	3.40579	1.41387	9.45322	59.8717	3.34825	0.92002	5.58004	62.7642	1.36357	1.42449	9.49934	59.5368	3.30291	1.36255	8.62964	60.3489	2.84447
0.5	Rendering 1	dataset09.01.2023	sieć mobilna A	MobileNet V3 Small	224	1.66667	2	Rotation 90° x	650	0	5000	0	115	0	0	115	0	Tak	PiecewiseConstantDecay	RMSprop	1e-05	decay_steps=100000, decay_rate=0.96,	Nie	0.706896	6.14151	37.0179	0.962897	1.16106	8.19748	60.3634	2.32613	1.19324	8.48794	63.6693	2.62897	0.721141	6.28794	37.1002	1.02328	1.19039	8.44921	61.8449	2.54049	1.08328	7.38543	60.5903	2.11966
0.5	Rendering 1	dataset09.01.2023	sieć mobilna A	MobileNet V3 Small	224	1.66667	2	Rotation 90° x	650	0	2500	0	115	0	0	115	0	Tak	PiecewiseConstantDecay	RMSprop	1e-05	decay_steps=100000, decay_rate=0.96,	Nie	0.777149	6.46371	41.7477	1.15761	1.10555	7.92317	59.7117	2.14991	1.16588	8.41743	65.5293	2.40676	0.775404	6.54051	42.3872	1.14609	1.2482	8.824	61.4644	2.8541	1.13389	7.69192	61.043	2.29885
0.5	Rendering 1	dataset09.01.2023	sieć mobilna A	MobileNet V3 Small	224	1.66667	2	Rotation 90° x	650	0	0	0	115	0	0	115	0	Tak	PiecewiseConstantDecay	RMSprop	1e-05	decay_steps=100000, decay_rate=0.96,	Nie	0.915923	5.34199	59.7217	1.38158	1.44833	9.55873	58.8071	3.40579	1.41387	9.45322	59.8717	3.34825	0.92002	5.58004	62.7642	1.36357	1.42449	9.49934	59.5368	3.30291	1.36255	8.62964	60.3489	2.84447
0.5	Rendering 1	dataset09.01.2023	sieć mobilna A	MobileNet V3 Small	224	1.66667	2	Rotation 90° x	650	0	5000	0	115	0	0	115	0	Tak	PiecewiseConstantDecay	RMSprop	0.001	decay_steps=100000, decay_rate=0.96,	Tak	0.253334	2.38414	12.778	0.132692	0.751834	5.90572	35.3875	1.15592	0.784444	6.24376	38.2121	1.24819	0.242524	2.2718	12.1237	0.124977	0.873728	6.67784	39.5981	1.41021	0.802447	5.81905	38.473	1.11455
0.5	Rendering 1	dataset09.01.2023	sieć mobilna A	MobileNet V3 Small	224	1.66667	2	Rotation 90° x	650	0	2500	0	115	0	0	115	0	Tak	PiecewiseConstantDecay	RMSprop	0.001	decay_steps=100000, decay_rate=0.96,	Tak	0.287345	2.57861	14.866	0.175778	0.804801	5.98908	64.2366	1.01795	0.916462	6.53702	83.9565	1.1736	0.279111	2.54531	14.4076	0.161313	0.752225	5.93569	42.5753	1.12169	0.689362	5.14271	41.6201	0.897708
0.5	Rendering 1	dataset09.01.2023	sieć mobilna A	MobileNet V3 Small	224	1.66667	2	Rotation 90° x	650	0	0	0	115	0	0	115	0	Tak	PiecewiseConstantDecay	RMSprop	0.001	decay_steps=100000, decay_rate=0.96,	Tak	0.511262	3.44487	33.1517	0.485369	0.917726	6.83249	76.5295	1.35619	1.07557	7.57254	104.617	1.6139	0.445188	2.94659	27.8127	0.384897	0.834783	6.21837	63.1751	1.27802	0.786564	5.66075	63.149	1.03032
0.5	Rendering 1	dataset09.01.2023	sieć mobilna A	MobileNet V3 Small	224	1.66667	2	Rotation 90° x	650	0	5000	0	115	0	0	115	0	Tak	PiecewiseConstantDecay	RMSprop	0.001	decay_steps=100000, decay_rate=0.96,	Nie	0.253334	2.38414	12.778	0.132692	0.751834	5.90572	35.3875	1.15592	0.784444	6.24376	38.2121	1.24819	0.242524	2.2718	12.1237	0.124977	0.873728	6.67784	39.5981	1.41021	0.802447	5.81905	38.473	1.11455
0.5	Rendering 1	dataset09.01.2023	sieć mobilna A	MobileNet V3 Small	224	1.66667	2	Rotation 90° x	650	0	2500	0	115	0	0	115	0	Tak	PiecewiseConstantDecay	RMSprop	0.001	decay_steps=100000, decay_rate=0.96,	Nie	0.287345	2.57861	14.866	0.175778	0.804801	5.98908	64.2366	1.35619	1.07557	7.57254	104.617	1.6139	0.445188	2.94659	27.8127	0.384897	0.834783	6.21837	63.1751	1.27802	0.786564	5.66075	63.149	1.03032
0.5	Rendering 1	dataset09.01.2023	sieć mobilna A	MobileNet V3 Small	224	1.66667	2	Rotation 90° x	650	0	0	0	115	0	0	115	0	Tak	PiecewiseConstantDecay	RMSprop	0.001	decay_steps=100000, decay_rate=0.96,	Nie	0.511262	3.44487	33.1517	0.485369	0.917726	6.83249	76.5295	1.01795	0.916462	6.53702	83.9565	1.1736	0.279111	2.54531	14.4076	0.161313	0.752225	5.93569	42.5753	1.12169	0.689362	5.14271	41.6201	0.897708
0.5	Rendering 1	dataset09.01.2023	sieć mobilna A	MobileNet V3 Small	224	2	2	Rotation 90° x	650	0	5000	0	115	0	0	115	0	Tak	ExponentialDecay	RMSprop	1e-05	decay_steps=100000, decay_rate=0.96,	Tak	0.44421	4.03341	22.8782	0.402531	0.823084	6.02905	58.6776	1.19201	0.817299	5.97773	54.8317	1.16132	0.332059	3.02049	17.2383	0.222941	0.907507	6.84531	54.0195	1.40109	0.895678	6.77481	50.1835	1.46053
0.5	Rendering 1	dataset09.01.2023	sieć mobilna A	MobileNet V3 Small	224	2	2	Rotation 90° x	650	0	2500	0	115	0	0	115	0	Tak	ExponentialDecay	RMSprop	1e-05	decay_steps=100000, decay_rate=0.96,	Tak	0.541844	4.68978	29.0978	0.562333	0.867938	6.36277	63.2347	1.31235	0.822719	6.08928	59.5572	1.2336	0.410844	3.63939	21.9333	0.337809	0.900695	6.82508	59.5373	1.43615	0.909638	6.84853	58.409	1.59085
0.5	Rendering 1	dataset09.01.2023	sieć mobilna A	MobileNet V3 Small	224	2	2	Rotation 90° x	650	0	0	0	115	0	0	115	0	Tak	ExponentialDecay	RMSprop	1e-05	decay_steps=100000, decay_rate=0.96,	Tak	0.585661	3.7418	38.5315	0.619403	1.46359	9.47872	60.6739	3.51108	1.53126	9.88274	59.5248	3.81557	0.505241	3.34314	33.9384	0.45341	1.53205	10.2155	61.7664	3.76324	1.49405	9.99566	60.4153	3.72877
0.5	Rendering 1	dataset09.01.2023	sieć mobilna A	MobileNet V3 Small	224	2	2	Rotation 90° x	650	0	5000	0	115	0	0	115	0	Tak	ExponentialDecay	RMSprop	0.001	decay_steps=100000, decay_rate=0.96,	Tak	0.272299	2.58359	13.2442	0.16155	0.748972	5.68409	55.8194	0.953942	0.718374	5.71873	49.7106	0.931732	0.201301	1.90396	9.85375	0.0918884	0.818158	6.41754	54.2819	1.21853	0.772898	6.03869	47.1983	1.03612
0.5	Rendering 1	dataset09.01.2023	sieć mobilna A	MobileNet V3 Small	224	2	2	Rotation 90° x	650	0	2500	0	115	0	0	115	0	Tak	ExponentialDecay	RMSprop	0.001	decay_steps=100000, decay_rate=0.96,	Tak	0.330063	2.99464	16.6166	0.22691	1.4081	10.1228	235.868	3.02619	1.3011	9.72165	181.954	2.56886	0.254616	2.35688	12.6331	0.145838	0.644016	4.99263	40.546	0.757571	0.576236	4.4415	34.7343	0.607819
0.5	Rendering 1	dataset09.01.2023	sieć mobilna A	MobileNet V3 Small	224	2	2	Rotation 90° x	650	0	0	0	115	0	0	115	0	Tak	ExponentialDecay	RMSprop	0.001	decay_steps=100000, decay_rate=0.96,	Tak	0.466744	3.06722	29.5366	0.388952	1.25401	11.4199	129.55	3.42797	1.16295	10.6666	114.231	3.29515	0.412131	2.68219	27.1174	0.276679	0.649776	5.15686	50.3502	0.845715	0.603079	4.79704	49.4909	0.702692
0.5	Rendering 1	dataset09.01.2023	sieć mobilna A	MobileNet V3 Small	224	2	2	Saturation	650	0	5000	0	115	0	0	115	0	Tak	CosineDecay	Adam	1e-05			0.731315	6.25368	38.2202	1.02404	1.09782	7.21986	63.4794	2.09274	1.20044	8.50146	59.5377	2.49262	0.73037	6.28499	37.8298	1.01275	1.18651	8.14703	64.7989	2.42057	1.14687	7.76556	63.6084	2.23447
0.5	Rendering 1	dataset09.01.2023	sieć mobilna A	MobileNet V3 Small	224	2	2	Saturation	650	0	2500	0	115	0	0	115	0	Tak	CosineDecay	Adam	1e-05			0.948479	7.41873	51.9367	1.6219	1.04334	6.97243	70.3445	1.89526	1.11676	8.07856	60.319	2.11165	0.928375	7.32611	50.9898	1.56589	1.1584	8.00643	71.2111	2.24897	1.08502	7.49332	60.0492	2.16659
0.5	Rendering 1	dataset09.01.2023	sieć mobilna A	MobileNet V3 Small	224	2	2	Saturation	650	0	0	0	115	0	0	115	0	Tak	CosineDecay	Adam	1e-05			1.04324	6.15903	72.7322	1.75448	1.19819	7.51279	60.4256	2.57602	1.27978	8.65359	52.9474	3.06732	1.01668	5.96695	68.9656	1.65409	1.25678	8.1977	58.7259	2.80528	1.23712	8.02449	66.1707	2.61101
0.5	Rendering 1	dataset09.01.2023	sieć mobilna A	MobileNet V3 Small	224	2	2	Saturation	650	0	5000	0	115	0	0	115	0	Tak	CosineDecay	Adam	0.001			0.282669	2.63512	14.3088	0.162708	0.709195	5.13253	49.699	0.924558	0.796081	6.21555	48.745	1.14855	0.255037	2.38999	12.7955	0.136164	0.775643	5.85675	48.9174	1.1456	0.769966	5.76871	48.6756	1.11697
0.5	Rendering 1	dataset09.01.2023	sieć mobilna A	MobileNet V3 Small	224	2	2	Saturation	650	0	2500	0	115	0	0	115	0	Tak	CosineDecay	Adam	0.001			0.356202	3.16157	18.5532	0.261281	0.923116	6.40957	50.514	1.66656	1.04067	7.75177	48.56	2.09299	0.344202	3.08801	18.1056	0.236416	1.03196	7.38156	49.4218	1.98752	1.01424	7.20013	47.316	1.96682
0.5	Rendering 1	dataset09.01.2023	sieć mobilna A	MobileNet V3 Small	224	2	2	Saturation	650	0	0	0	115	0	0	115	0	Tak	CosineDecay	Adam	0.001			0.470833	3.07755	30.7065	0.393858	1.00944	6.83469	60.6897	1.80443	1.15718	8.37406	53.0201	2.61961	0.4121	2.70633	26.8536	0.297998	1.15398	8.01401	59.1967	2.36019	1.18118	8.01431	61.5744	2.48802
0.5	Rendering 1	dataset09.01.2023	sieć mobilna A	MobileNet V3 Small	224	2	2	Saturation	650	0	5000	0	115	0	0	115	0	Tak	PiecewiseConstantDecay	Adam		decay_steps=100000, decay_rate=0.96,	Tak	0.837675	6.99769	43.6846	1.30883	1.26336	8.85335	66.9077	2.85315	1.1339	8.14382	57.7745	2.59106	0.818391	6.92148	42.8079	1.26293	1.19519	8.72054	60.8863	2.55857	1.17524	8.56928	55.8689	2.64362
0.5	Rendering 1	dataset09.01.2023	sieć mobilna A	MobileNet V3 Small	224	2	2	Saturation	650	0	2500	0	115	0	0	115	0	Tak	PiecewiseConstantDecay	Adam		decay_steps=100000, decay_rate=0.96,	Tak	0.889676	7.12053	48.3089	1.47197	1.30184	9.09085	73.8775	2.77336	1.16951	8.39315	60.2738	2.54797	0.878884	7.05097	45.8272	1.47414	1.25537	9.15244	62.6288	2.74708	1.24322	8.99094	66.283	2.73043
0.5	Rendering 1	dataset09.01.2023	sieć mobilna A	MobileNet V3 Small	224	2	2	Saturation	650	0	0	0	115	0	0	115	0	Tak	PiecewiseConstantDecay	Adam		decay_steps=100000, decay_rate=0.96,	Tak	0.922472	5.67148	64.0003	1.45828	1.46824	9.81681	59.863	3.7293	1.40951	9.28307	57.8208	3.39978	0.867183	5.22855	59.1183	1.23219	1.55792	10.4388	59.4216	4.09769	1.46608	9.9669	57.732	3.59759
0.5	Rendering 1	dataset09.01.2023	sieć mobilna A	MobileNet V3 Small	224	2	2	Saturation	650	0	5000	0	115	0	0	115	0	Tak	PiecewiseConstantDecay	Adam		decay_steps=100000, decay_rate=0.96,	Nie	0.28457	2.64026	14.3791	0.169847	1.21843	8.73161	52.8725	2.52065	1.16682	8.26911	51.9709	2.54638	0.258436	2.40987	13.0062	0.140408	1.18808	8.76598	50.8049	2.56852	1.22336	8.84588	53.2468	2.65624
0.5	Rendering 1	dataset09.01.2023	sieć mobilna A	MobileNet V3 Small	224	2	2	Saturation	650	0	2500	0	115	0	0	115	0	Tak	PiecewiseConstantDecay	Adam		decay_steps=100000, decay_rate=0.96,	Nie	0.293316	2.64739	15.0467	0.180895	0.880367	6.7716	45.8117	1.47075	0.850448	6.56774	42.2287	1.49886	0.260226	2.33675	13.6387	0.139685	0.87681	6.93316	42.409	1.53557	0.860948	6.81619	40.2873	1.48343
0.5	Rendering 1	dataset09.01.2023	sieć mobilna A	MobileNet V3 Small	224	2	2	Saturation	650	0	0	0	115	0	0	115	0	Tak	PiecewiseConstantDecay	Adam		decay_steps=100000, decay_rate=0.96,	Nie	0.417156	2.81874	27.3625	0.325144	1.25467	8.76431	51.7796	3.00139	1.42341	10.2339	52.6728	3.54854	0.403817	2.6916	25.9102	0.309011	1.59548	10.1493	63.1995	4.08943	1.66389	10.5443	64.4852	4.15763
0.5	Rendering 1	dataset09.01.2023	sieć mobilna A	MobileNet V3 Small	224	2	2	Saturation	650	0	5000	0	115	0	0	115	0	Nie	PiecewiseConstantDecay	Adam		decay_steps=100000, decay_rate=0.96,	Tak	0.055	0.521	2.74	0.007	0.699	5.181	58.197	0.897	0.77	6.073	59.966	1.125	0.041	0.388	2.037	0.004	0.671	5.134	51.3	0.887	0.644	4.367	69.473	0.801
0.5	Rendering 1	dataset09.01.2023	sieć mobilna A	MobileNet V3 Small	224	2	2	Saturation	650	0	2500	0	115	0	0	115	0	Nie	PiecewiseConstantDecay	Adam		decay_steps=100000, decay_rate=0.96,	Tak	0.068	0.634	3.517	0.01	0.884	6.438	91.779	1.335	0.912	6.995	82.982	1.386	0.051	0.47	2.651	0.006	0.788	5.886	72.04	1.122	0.789	5.372	88.912	1.1
0.5	Rendering 1	dataset09.01.2023	sieć mobilna A	MobileNet V3 Small	224	2	2	Saturation	650	0	0	0	115	0	0	115	0	Nie	PiecewiseConstantDecay	Adam		decay_steps=100000, decay_rate=0.96,	Tak	0.07	0.642	3.692	0.01	0.689	5.096	59.079	0.815	0.767	5.979	61.726	0.984	0.052	0.478	2.68	0.006	0.614	4.744	45.926	0.695	0.58	4.079	52.113	0.619
0.5	Rendering 1	dataset09.01.2023	sieć mobilna A	MobileNet V3 Small	224	2	2	Saturation	650	0	5000	0	115	0	0	115	0	Nie	PiecewiseConstantDecay	Adam		decay_steps=100000, decay_rate=0.96,	Nie	0.108	0.723	7.363	0.02	1.137	8.171	49.566	2.536	1.26	9.309	50.483	3.006	0.067	0.456	4.456	0.008	1.216	8.478	51.257	2.521	1.01	6.749	47.666	1.965
0.5	Rendering 1	dataset09.01.2023	sieć mobilna A	MobileNet V3 Small	224	2	2	Saturation	650	0	2500	0	115	0	0	115	0	Nie	PiecewiseConstantDecay	Adam		decay_steps=100000, decay_rate=0.96,	Nie	0.3	2.667	16.236	0.178	1.052	7.468	83.184	1.877	1.142	8.481	76.287	2.22	0.289	2.599	15.49	0.169	0.962	6.913	73.093	1.745	0.918	6.036	86.574	1.516
0.5	Rendering 1	dataset09.01.2023	sieć mobilna A	MobileNet V3 Small	224	2	2	Saturation	650	0	0	0	115	0	0	115	0	Nie	PiecewiseConstantDecay	Adam		decay_steps=100000, decay_rate=0.96,	Nie	0.375	3.331	20.036	0.307	0.921	6.522	79.772	1.515	1.011	7.514	78.708	1.763	0.353	3.139	18.981	0.267	1.045	7.291	79.017	1.856	1.004	6.426	99.186	1.801
0.5	Rendering 1	dataset09.01.2023	sieć mobilna A	MobileNet V3 Small	224	2	2	Saturation	650	0	5000	0	115	0	0	115	0	Tak	CosineDecay	RMSprop	1e-05			0.617584	5.41382	32.8441	0.742819	0.941528	6.51727	62.7702	1.65739	1.02673	7.62139	56.3755	1.96306	0.605013	5.31583	31.8917	0.714155	1.02262	7.3352	70.4525	1.80235	0.997119	7.03746	65.6275	1.75258
0.5	Rendering 1	dataset09.01.2023	sieć mobilna A	MobileNet V3 Small	224	2	2	Saturation	650	0	2500	0	115	0	0	115	0	Tak	CosineDecay	RMSprop	1e-05			0.754377	6.28038	41.1259	1.05066	0.910838	6.24612	80.6691	1.38937	0.957221	7.15239	66.544	1.61139	0.731795	6.03758	39.3867	1.00846	0.969825	6.86852	77.5047	1.56067	0.930899	6.58116	72.7335	1.54329
0.5	Rendering 1	dataset09.01.2023	sieć mobilna A	MobileNet V3 Small	224	2	2	Saturation	650	0	0	0	115	0	0	115	0	Tak	CosineDecay	RMSprop	1e-05			0.881202	5.21486	60.9717	1.25668	1.18616	7.49706	57.6388	2.34245	1.23237	8.47462	53.5799	2.74007	0.904039	5.5974	64.4497	1.36827	1.33086	8.5786	64.8735	2.77135	1.39627	8.74829	65.683	3.11414
0.5	Rendering 1	dataset09.01.2023	sieć mobilna A	MobileNet V3 Small	224	2	2	Saturation	650	0	5000	0	115	0	0	115	0	Tak	CosineDecay	RMSprop	0.001			0.218695	2.09073	10.6475	0.105957	0.703264	5.13	39.692	0.960459	0.828199	6.41936	42.0859	1.27947	0.202959	1.9375	9.93821	0.0904752	0.7889	5.88092	40.4973	1.1895	0.764416	5.66533	40.0512	1.06256
0.5	Rendering 1	dataset09.01.2023	sieć mobilna A	MobileNet V3 Small	224	2	2	Saturation	650	0	2500	0	115	0	0	115	0	Tak	CosineDecay	RMSprop	0.001			0.25925	2.40475	13.2376	0.139636	0.694449	5.13707	36.1702	1.02133	0.806578	6.43644	35.4124	1.36312	0.235106	2.17376	11.9763	0.114824	0.847994	6.33614	39.8235	1.4811	0.813579	6.08776	38.132	1.37458
0.5	Rendering 1	dataset09.01.2023	sieć mobilna A	MobileNet V3 Small	224	2	2	Saturation	650	0	0	0	115	0	0	115	0	Tak	CosineDecay	RMSprop	0.001			0.287621	1.92237	18.8091	0.146062	1.2749	9.31005	49.3599	3.12522	1.11458	7.97629	46.4186	2.59338	0.268136	1.82399	17.6858	0.128092	1.19931	8.43361	51.7066	2.68411	1.14202	8.19768	45.765	2.61808
0.5	Rendering 1	dataset09.01.2023	sieć mobilna A	MobileNet V3 Small	224	2	2	Saturation	650	0	5000	0	115	0	0	115	0	Tak	PiecewiseConstantDecay	RMSprop		decay_steps=100000, decay_rate=0.96,	Tak	0.61324	5.37164	32.5729	0.725815	1.25853	8.8356	78.575	2.682	1.1527	8.22375	67.1794	2.36544	0.596366	5.25724	31.5568	0.691972	1.27145	9.20102	73.7707	2.67628	1.18603	8.61477	67.6197	2.48542
0.5	Rendering 1	dataset09.01.2023	sieć mobilna A	MobileNet V3 Small	224	2	2	Saturation	650	0	2500	0	115	0	0	115	0	Tak	PiecewiseConstantDecay	RMSprop		decay_steps=100000, decay_rate=0.96,	Tak	0.755574	6.25552	41.7404	1.03466	1.15233	8.27962	77.0167	2.25619	1.07995	7.84869	66.9108	2.23722	0.735324	6.13733	40.6832	1.00973	1.20063	8.7596	68.7766	2.60716	1.1854	8.70342	66.8825	2.56574
0.5	Rendering 1	dataset09.01.2023	sieć mobilna A	MobileNet V3 Small	224	2	2	Saturation	650	0	0	0	115	0	0	115	0	Tak	PiecewiseConstantDecay	RMSprop		decay_steps=100000, decay_rate=0.96,	Tak	0.918511	5.49856	61.0855	1.36727	1.3309	9.17331	64.8089	2.90878	1.21128	8.30731	63.085	2.41588	0.901816	5.47564	60.3145	1.32346	1.33538	9.33164	57.5131	3.01251	1.35211	9.37964	63.6007	3.07535
0.5	Rendering 1	dataset09.01.2023	sieć mobilna A	MobileNet V3 Small	224	2	2	Saturation	650	0	5000	0	115	0	0	115	0	Tak	PiecewiseConstantDecay	RMSprop		decay_steps=100000, decay_rate=0.96,	Nie	0.226868	2.15206	11.2051	0.109063	0.722208	5.66287	46.8102	0.913442	0.766554	5.9176	51.8408	1.04304	0.210186	2.00138	10.3601	0.0957681	0.773351	6.00787	49.6766	1.04867	0.804306	6.34069	51.355	1.13232
0.5	Rendering 1	dataset09.01.2023	sieć mobilna A	MobileNet V3 Small	224	2	2	Saturation	650	0	2500	0	115	0	0	115	0	Tak	PiecewiseConstantDecay	RMSprop		decay_steps=100000, decay_rate=0.96,	Nie	0.257382	2.36349	13.3053	0.137779	0.706498	5.50773	47.3647	0.892612	0.764632	5.93616	52.5229	1.02964	0.237871	2.17177	12.2961	0.114624	0.78748	6.21009	42.9126	1.17604	0.797658	6.28518	43.7274	1.23263
0.5	Rendering 1	dataset09.01.2023	sieć mobilna A	MobileNet V3 Small	224	2	2	Saturation	650	0	0	0	115	0	0	115	0	Tak	PiecewiseConstantDecay	RMSprop		decay_steps=100000, decay_rate=0.96,	Nie	0.281211	1.84864	18.0364	0.150956	1.21698	8.60781	54.4743	2.84331	1.34158	9.84737	53.3311	3.18439	0.258041	1.73933	16.7593	0.122465	1.20829	8.61993	50.3255	2.82788	1.27074	8.96455	52.4211	2.78929
0.5	Rendering 1	dataset09.01.2023	sieć mobilna A	MobileNet V3 Small	224	2	2	Saturation	650	0	5000	0	115	0	0	115	0	Nie	PiecewiseConstantDecay	RMSprop		decay_steps=100000, decay_rate=0.96,	Tak	0.102	0.907	5.527	0.021	1.027	7.464	53.214	2.017	1.098	8.37	52.043	2.364	0.085	0.75	4.592	0.015	1.028	7.436	54.095	1.901	0.844	5.83	50.368	1.468
0.5	Rendering 1	dataset09.01.2023	sieć mobilna A	MobileNet V3 Small	224	2	2	Saturation	650	0	2500	0	115	0	0	115	0	Nie	PiecewiseConstantDecay	RMSprop		decay_steps=100000, decay_rate=0.96,	Tak	0.107	0.71	7.254	0.022	1.123	8.041	51.715	2.528	1.233	9.149	51.789	2.982	0.118	0.801	8.026	0.027	1.112	7.985	48.387	2.254	0.926	6.308	47.231	1.74
0.5	Rendering 1	dataset09.01.2023	sieć mobilna A	MobileNet V3 Small	224	2	2	Saturation	650	0	0	0	115	0	0	115	0	Nie	PiecewiseConstantDecay	RMSprop		decay_steps=100000, decay_rate=0.96,	Tak	0.234	2.132	12.363	0.111	1.019	7.286	91.462	1.714	1.033	7.715	82.994	1.899	0.22	1.97	11.9	0.098	0.934	6.782	73.281	1.57	0.942	6.247	100.143	1.566
0.5	Rendering 1	dataset09.01.2023	sieć mobilna A	MobileNet V3 Small	224	2	2	Saturation	650	0	5000	0	115	0	0	115	0	Nie	PiecewiseConstantDecay	RMSprop		decay_steps=100000, decay_rate=0.96,	Nie	0.298	2.613	16.784	0.173	1.123	8.003	112.973	1.943	1.118	8.283	114.581	1.995	0.271	2.361	15.634	0.14	0.997	7.086	101.913	1.566	1.006	6.68	124.67	1.6
0.5	Rendering 1	dataset09.01.2023	sieć mobilna A	MobileNet V3 Small	224	2	2	Saturation	650	0	2500	0	115	0	0	115	0	Nie	PiecewiseConstantDecay	RMSprop		decay_steps=100000, decay_rate=0.96,	Nie	0.281	2.433	15.686	0.163	0.986	6.936	101.983	1.478	0.995	7.41	87.562	1.547	0.26	2.224	14.814	0.131	0.95	6.838	81.298	1.437	0.936	6.215	98.418	1.356
0.5	Rendering 1	dataset09.01.2023	sieć mobilna A	MobileNet V3 Small	224	2	2	Saturation	650	0	0	0	115	0	0	115	0	Nie	PiecewiseConstantDecay	RMSprop		decay_steps=100000, decay_rate=0.96,	Nie	0.271	1.749	19.66	0.117	1.187	8.2	71.514	2.43	1.219	8.876	61.302	2.769	0.244	1.55	17.366	0.1	1.123	7.773	56.766	2.267	0.99	6.423	64.43	1.862
0.5	dataset16.02.2023	dataset16.02.2023	sieć mobilna C	JaceknetXD	224	1.66667	4	Flip, rotation 90° x, brightness, contrast, hue, saturation, Poisson noise (strength 0.05)	650	0	2500	0	115	0	0	115	0	Tak	PiecewiseConstantDecay	RMSprop	0.001	decay_steps=100000, decay_rate=0.96,	Tak	1.32974	9.16936	59.547	3.62049	0.721267	5.33441	37.2106	1.18667	0.674639	4.98529	34.1984	0.994483	0.999914	7.54134	46.1733	2.19346	0.740984	5.47154	37.7478	1.20596	0.746032	5.65682	35.3363	1.29625
0.5	dataset16.02.2023	dataset16.02.2023	sieć mobilna C	JaceknetXD	224	1.66667	4	Flip, rotation 90° x, brightness, contrast, hue, saturation, Poisson noise (strength 0.05)	650	0	5000	0	115	0	0	115	0	Tak	PiecewiseConstantDecay	RMSprop	0.001	decay_steps=100000, decay_rate=0.96,	Tak	0.745693	5.73624	36.9505	1.39093	0.91766	5.86969	45.4573	1.22662	0.904922	6.11149	42.8963	1.32657	0.745693	5.73624	36.9505	1.39093	0.91766	5.86969	45.4573	1.22662	0.904922	6.11149	42.8963	1.32657
0.5	dataset16.02.2023	dataset16.02.2023	sieć mobilna C	JaceknetXD	224	1.66667	4	Flip, rotation 90° x, brightness, contrast, hue, saturation, Poisson noise (strength 0.05)	650	0	0	0	115	0	0	115	0	Tak	PiecewiseConstantDecay	RMSprop	1e-05	decay_steps=100000, decay_rate=0.96,	Tak	0.674323	4.74832	38.543	0.879185	0.719178	5.18286	37.1572	0.930039	0.686472	4.76545	34.0557	0.852756	0.478729	3.38615	29.182	0.477783	0.622199	4.5534	31.7724	0.816785	0.594686	3.68855	34.2853	0.68541
0.5	dataset16.02.2023	dataset16.02.2023	sieć mobilna B	MobileNet V3 Large	224	2	4	Flip, rotation 90° x, brightness, contrast, hue, saturation, Poisson noise (strength 0.05)	650	0	5000	0	115	0	0	115	0	Tak	PiecewiseConstantDecay	RMSprop	0.001	decay_steps=100000, decay_rate=0.96,	Tak	0.217659	1.8941	11.5677	0.100409	0.888074	5.80629	46.1232	0.973871	0.931828	6.26061	46.1201	1.07377	0.217659	1.8941	11.5677	0.100409	0.888074	5.80629	46.1232	0.973871	0.931828	6.26061	46.1201	1.07377
0.5	dataset16.02.2023	dataset16.02.2023	sieć mobilna B	MobileNet V3 Large	224	2	4	Flip, rotation 90° x, brightness, contrast, hue, saturation, Poisson noise (strength 0.05)	650	0	2500	0	115	0	0	115	0	Tak	PiecewiseConstantDecay	RMSprop	0.001	decay_steps=100000, decay_rate=0.96,	Tak	0.243762	2.09318	13.0788	0.124246	0.256545	1.77631	16.6223	0.120344	0.279303	2.0603	18.8188	0.157288	0.0836191	0.726368	4.49907	0.0155758	0.244195	1.64088	15.2974	0.0874833	0.198873	1.33544	13.4285	0.0655157
0.5	dataset16.02.2023	dataset16.02.2023	sieć mobilna B	MobileNet V3 Large	224	1.66667	4	Flip, rotation 90° x, brightness, contrast, hue, saturation, Poisson noise (strength 0.05)	650	0	0	0	115	0	0	115	0	Tak	PiecewiseConstantDecay	RMSprop	0.001	decay_steps=100000, decay_rate=0.96,	Tak	0.132008	1.00529	7.96656	0.0389344	0.493544	3.65352	26.4505	0.364303	0.472842	3.37469	25.7178	0.292932	0.106011	0.806261	6.36626	0.0259267	0.483638	3.5369	26.7301	0.312217	0.419738	2.82814	25.5768	0.233724
0.5	dataset23.02.2023	dataset23.02.2023	sieć mobilna B	MobileNet V3 Large	224	2	4	Flip, rotation 90° x, brightness, contrast, hue, saturation, Poisson noise (strength 0.05)	650	0	2500	0	115	0	0	115	0	Tak	PiecewiseConstantDecay	RMSprop	0.001	decay_steps=100000, decay_rate=0.96,	Tak	0.903097	6.85427	50.1568	1.55324	0.866503	5.99173	41.423	1.27637	0.713457	4.76159	38.7688	0.887035	0.2426	2	13.27	0.1186	0.8496	5.45	44.17	0.8898
0.5	dataset23.02.2023	dataset23.02.2023	sieć D	ResNet-50	224	2	4	Flip, rotation 90° x, brightness, contrast, hue, saturation, Poisson noise (strength 0.05)	650	0	2500	0	115	0	0	115	0	Tak	PiecewiseConstantDecay	RMSprop	0.001	decay_steps=100000, decay_rate=0.96,	Tak	0.343055	2.909	18.2691	0.255669	1.34667	8.46925	61.0263	2.3935	1.28848	7.74593	61.8416	2.16626	0.324281	2.72025	17.4409	0.220095	1.39481	8.47799	64.1884	2.37541	1.38662	8.50832	63.7664	2.39755
0.5	dataset23.02.2023 128x128	dataset23.02.2023 128x128	sieć mobilna B	MobileNet V3 Large	224	2	4	Flip, rotation 90° x, brightness, contrast, hue, saturation, Poisson noise (strength 0.05)	650	0	2500	0	115	0	0	115	0	Tak	PiecewiseConstantDecay	RMSprop	0.001	decay_steps=100000, decay_rate=0.96,	Tak													0.259	2.1648	14.1151	0.1377	1.0385	7.221	49.0282	1.4621
0.5	dataset23.02.2023_nn_ag_1	dataset23.02.2023_nn_ag_1	sieć mobilna B	MobileNet V3 Large	224	2	4	Flip, rotation 90° x, brightness, contrast, hue, saturation, Poisson noise (strength 0.05)	650	0	2500	0	115	0	0	115	0	Tak	PiecewiseConstantDecay	RMSprop	0.001	decay_steps=100000, decay_rate=0.96,	Tak	0.254648	2.16865	13.8081	0.134463	0.576333	3.73874	33.7286	0.4371	0.73783	5.5348	36.6703	0.762145	0.237352	2.03393	12.8339	0.118264	0.71503	5.10159	36.624	0.639601	0.649843	4.43628	35.2386	0.528595
0.5	dataset3.03.2023	dataset3.03.2023	sieć mobilna B	MobileNet V3 Large	224	2	4	Flip, rotation 90° x, brightness, contrast, hue, saturation, Poisson noise (strength 0.05)	650	0	2500	0	115	0	0	115	0	Tak	PiecewiseConstantDecay	RMSprop	0.001	decay_steps=100000, decay_rate=0.96,	Tak	0.213091	1.59732	13.3357	0.097254	1.07863	6.68709	54.9616	1.40253	1.14279	7.72583	54.4841	1.68094	0.207337	1.57477	13.0456	0.092655	1.1113	6.86646	55.7808	1.50842	1.18437	7.62279	57.0775	1.62835
0.5	dataset3.03.2023_nn_ag_3	dataset3.03.2023_nn_ag_3	sieć mobilna B	MobileNet V3 Large	224	2	4	Flip, rotation 90° x, brightness, contrast, hue, saturation, Poisson noise (strength 0.05)	650	0	2500	0	115	0	0	115	0	Tak	PiecewiseConstantDecay	RMSprop	0.001	decay_steps=100000, decay_rate=0.96,	Tak	0.20266	1.54893	12.6367	0.0924665	0.816832	5.2377	44.149	0.78769	0.872082	6.16279	43.5252	0.989182	0.193661	1.47893	12.0538	0.0854641	0.817341	5.25166	43.5221	0.839451	0.90026	6.09745	45.329	0.952196
0.5	dataset23.03.2023	dataset16.02.2023	sieć mobilna B	MobileNet V3 Large + % leaf size	224	2	4	Flip, rotation 90° x, brightness, contrast, hue, saturation, Poisson noise (strength 0.05)	650	0	5000	0	115	0	0	115	0	Tak	PiecewiseConstantDecay	RMSprop	0.001	decay_steps=100000, decay_rate=0.96,	Tak													0.13	1.05	7.64	0.0643141	0.04	1.85	12.35	0.13
0.5	dataset23.03.2023	dataset16.02.2023	sieć mobilna B	MobileNet V3 Large + % leaf size (best)	224	2	4	Flip, rotation 90° x, brightness, contrast, hue, saturation, Poisson noise (strength 0.05)	650	0	5000	0	115	0	0	115	0	Tak	PiecewiseConstantDecay	RMSprop	0.001	decay_steps=100000, decay_rate=0.96,	Tak													0.13	1.02	7.48	0.0643141	0.04	0.98	9.71	0.05
0.5	SD_first_real_fbig	SD_first_real_fbig	sieć mobilna B	MobileNet V3 Large + % leaf size	512			None																													0.3	2			0.44	4.4
